# Supplementary material for: Affinity-tagged SMAD1 and SMAD5 mouse lines reveal transcriptional reprogramming mechanisms during early pregnancy
Source: eLife. 2024 Mar 27;12:RP91434. doi: 10.7554/eLife.91434 (PMC10972565; doi:10.7554/eLife.91434)
Supplement: Supplementary file 3. — (a) DNA sequences used in the study. (b) Direct target genes of SMAD1/5. (c) Results of Gene Ontology enrichment analysis of shared direct target genes of SMAD1/5 from the up-targets. (d) Results of Gene Ontology enrichment analysis of shared direct target genes of SMAD1/5 from the down-targets. (e) Results of KEGG pathway enrichment analysis for shared genes bound by SMAD1, SMAD5, and PR. (f) Results of motif analysis results for shared peaks between SMAD1, SMAD5, and PR. (g) Gene overlapping results of SMAD1/5 and SOX17. (h) Gene overlapping results of SMAD1/5 and NR2F2. [file elife-91434-supp3.xlsx]

## Sheet: Supplementary File 3a
	Supplementary File 3a: DNA sequences used in the study. Include primer sequences used for genotype, RT-qPCR. sgRNA sequences targeting Smad1 and Smad5 are included with annotation of sgRNA. HDR templates used for generation of the knock-in mouse lines are also included with usage annotated as HDR template.
	Name	Sequence/Catalog number	Usage	Note
	S1-F1	CAAACCGCAGACCAAGAAGC	For Smad1HA/HA genotyping
	S1-R1	CTTCTCCAGCTCTTCCATGGC
	S5-F1	TGCTTAAGACCTGCATGTGACT	For Smad5PA/PA genotyping
	S5-R1	CATCCACTGCCTTTTCTGCC
	GAPDH-F	ACAACTTTGGTATCGTGGAAGG	GAPDH RT-PCR
	GAPDH-R	GCCATCACGCCACAGTTTC
	ACTB-F	CTGGAACGGTGAAGGTGACA	ACTB RT-PCR
	ACTB-R	AAGGGACTTCCTGTAACAATGCA
	RPL13A-F	CCTGGAGGAGAAGAGGAAAGAGA
	RPL13A-R	TTGAGGACCTCTGTGTATTTGTCAA
	RORB-F	TGTGCCATCCAGATCACTCACG	RORB RT-PCR
	RORB-R	GGTTGAAGGCACGGCACATTCT
	SMAD5-F	CTCGCGAAAAGGAAGCTGTTG	SMAD5 RT-PCR
	SMAD5-R	GGGTCAAGTCAGAGGCAGATT
	SMAD1-F	ATGGTGACACAGTTACTCGGT	SMAD1 RT-PCR
	SMAD1-R	AGAGACTTCTTGGGTGGAAACA
	KLF15-F	GTGAGAAGCCCTTCGCCTGCA	KLF15 RT-PCR
	KLF15-R	ACAGGACACTGGTACGGCTTCA
	IGFBP1	qHsaCID0014281	IGFBP1 RT-PCR	PrimePCR™ SYBR® Green Assay: IGFBP1, Human
	FOXO1	qHsaCED0004488	FOXO1 RT-PCR	PrimePCR™ SYBR® Green Assay: FOXO1, Human
	PRL	qHsaCID0015557	PRL RT-PCR	PrimePCR™ SYBR® Green Assay: PRL, Human
	sgRNA-SMAD1	CTGGTCACATTCATAGCGGC	sgRNA for SMAD1-HA
	sgRNA-SMAD5	TTTGTATCAAATGACGTCAATGG	sgRNA for SMAD5-PA
	HDR templete for SMAD1	GGAGCTGGCACCTCACCCTGTCTGAGGAGCGTGTAGAACTAGACCAGCCGCTATGACCATGTACCCATACGATGTTCCAGATTACGCTGGTGGCGGCAAATTCGGTGGCGGCAAATTCAATGTGACCAGCTTGTTTTCATTCACAAGTCCAGCTGTGAAGAGACTCCTTGGG	HDR templete for generating the knock-in mice	Sequence for generating repair oligo of homology-directed repair
	HDR templete for SMAD5	GGCTGTGTTTGACGTTTGGTATATATGACAAGTCTTATTCTGAGTCGGCTCATCTTAGATGACTCTTTGAACCTCTGCTTTGCCAGTGAACTATTTGGTTCCGAAGAAGGGAGTGTGTAGCTACAGGTGTTTTAGAGACATTTGGTTTTATTGTTTTTGTTTTACTTTGAATGCTTCTCTACTTTTACTCTGATAAAATGGTTTTCACTCGTGCTAACTAGTCTTCTTAGACTGAATCAGGCTCCCTTTGCCCTCTTTCAGGACTTGCACTAAGAAGAAGCCTATGGCACCTGTCAAGTTAAATGTCACTCCCCGCCTCCACTTGGACTTTCTGCTTAAGACCTGCATGTGACTTTTCACCTGCGAGCCACGCTTTTGGTATCTACTGACTTTGATTAC…	HDR templete for generating the knock-in mice	Sequence is inserted into pBluescript II SK (+) vector.

## Sheet: Supplementary File 3b
Combined direct down-targets of SMAD1and SMAD5(523+83+13)	Combined direct up-targets of SMAD1 and SMAD5 (449+187+30)
Rorb	A630001G21Rik
Rbms3	Sult1c2
Jak1	Plch2
Col14a1	Arrdc3
Bmper	Cd47
Edn3	Nrep
Cwc22	Ppp2r2b
Has2	Dio2
Celf2	Ccser2
Vgll3	Asic2
Lrrc3b	Galnt3
Zbtb20	Egfl6
Runx1t1	Pam
Plekhg1	Rgs3
Gnai1	Lypd6b
Lama2	Fermt1
Kcnd2	Pla2g4a
Tenm3	Tspan33
Racgap1	Muc4
Pfn2	Chac2
Tshz2	Ttc9
Map2	Msx2
Tcf4	Deptor
Ect2	Ffar4
Pros1	Atxn1
Vav3	Gpm6b
Stard13	Klf4
Adgra3	Mogat1
Wnt5a	Egln3
Lsamp	Fgd3
Add3	Pfkfb3
Jazf1	4930426D05Rik
Cobl	Smim31
Cthrc1	Scx
Steap4	Rps24
Cyp26a1	Chga
Basp1	Ifne
Nfil3	Grik4
Lamc1	Bcl2l14
Cacna2d1	Six1
Pde1a	Cpne8
Dlg2	Slc16a14
Cdh11	Cdh1
Rbpj	1600027J07Rik
Gm29683	Morrbid
Olfml2b	Ntf3
Elmo1	Cryl1
Rgs5	Msc
Pbx1	Cadm4
Frmd6	Kctd1
Tle4	Plcd3
Nkg7	Ngef
Hopx	Dctn6
Pfkfb3	Ptpru
Sptlc3	Myo1b
Ammecr1	Hmgcll1
Gramd1b	Pkp3
Ccdc141	Dync1i1
Suco	Hmga2
Arid5b	Macc1
Gria4	Dclk3
Fst	Fmr1
Nkain1	Igsf5
Rps24	Iapp
Egfr	Vtcn1
Dab2	Fut9
Gli3	Ezr
Mme	Zeb2
Akap11	Tmem45b
Tiparp	Exoc1
Cd36	Pde7b
Col18a1	Rnf180
Kcnab1	Ddc
Etnk1	Steap1
Nhsl2	Osbpl9
Hgf	Grem2
Ncr1	Car2
4930503L19Rik	Gpr39
Selp	Akr1c14
Ntm	Mall
Tfpi2	Capsl
Clock	Mid1
Antxr2	Cftr
Pdgfd	Frmd4b
Atp10a	Barx2
Ino80d	Map2k6
Ube3a	Unc5cl
Pid1	Sec16b
Gpc6	Hes1
Prex2	Ank3
Creb5	Grb10
Clec4a2	4930523C07Rik
Itgb8	Itga9
Col4a5	Ltbp1
Tgfbr3	Dynlt1b
Penk	Phyhip
Aff3	Dennd1a
Magi1	Slc7a11
Dync1i1	Myo5c
Lpgat1	Plb1
Dclk1	Dlx6os1
Kcnab2	Alcam
Ric1	Mdm4
Cd93	Atp10b
Cyp1b1	Ano4
Ppp2r5c	Pls1
Vit	Dbpht2
Slc25a26	Me1
Zeb2	C1qtnf7
Smc5	Stc2
Fez1	Ncoa7
Rcn1	Arl4c
Nid1	Phactr1
Bbx	Zbtb38
Pard3	Sec11c
Palld	Trpm6
Acot7	Cp
Mid1	Ifi47
Dlc1	L3mbtl3
Spink1	Sdcbp2
Cdc14a	Dlgap4
Ptprg	Nedd9
Klhl13	Krt19
Filip1	Spon2
Col22a1	Dpp6
Eda2r	Bcat1
Ank3	Igfbp2
Grb10	Cbr2
Atp11a	Tnfrsf19
Ppfia2	Fzd10
Dennd1a	Snx7
Add1	Car12
Cdc37l1	2010204K13Rik
Ptn	Micall2
Ralgapa1	Slc27a2
Apcdd1	Sat1
Col11a1	Txnrd2
Lrrn1	Smpd3
Zbtb18	Fam171a1
Lin7a	Akr1c12
Foxn3	Cldn10
Btbd3	Slc40a1
Pde2a	Plet1
Map7d2	Lpin3
Mdm4	Sh2d4b
Fam102b	Lurap1l
Prickle2	Abi2
Abi3bp	1700086L19Rik
Piezo2	Rnf130
Mamdc2	Esrp1
Cenpc1	Sh2d4a
Ndp	Tmem200a
Ktn1	Cldn2
Acaca	Plch1
Nrn1	Ptpn22
Cnn3	Zfp516
Bnc2	Tspan8
Synpo	Serpinb7
Heg1	Cytl1
Adam19	Prss23
Vps13d	F11r
Prdm1	Casp1
Rps6ka5	Kctd4
Ccr2	Sil1
Zbtb38	Aldh1a1
Caprin2	Adgrg1
Cdh10	Jup
Uggt2	Ebag9
Vcan	Terc
Ebf1	Rgs12
Vps39	Arl14
Cp	Tmprss11e
Dlgap4	Cyb5r4
Vim	Slc39a8
Pi15	Ttc39a
Slc43a2	Eva1a
Osr1	Fndc1
Nedd9	Dsc2
Tulp4	Scmh1
Pdzrn3	Grhl2
Hmbox1	Lama3
E130008D07Rik	Mycn
Cd38	Arhgef38
Jam2	Klhl14
Smarca2	Wnt4
Cped1	Inhbb
Macf1	Raly
Lrrc57	Gmds
Arvcf	Wnt7a
Dclk2	Myo10
Tcf12	Immt
Cpne5	Rnf183
Col26a1	Fam184b
Slitrk3	Avpi1
Kbtbd8	Ltf
Arhgap31	Ttc19
Prickle1	Slc15a2
Tmem255a	Cdk18
Tcaf1	Itgb6
Erc1	Ppfibp1
Xcl1	Tec
Egflam	Scml4
9930014A18Rik	Spink12
Rnf150	Ctnnd1
Arrb1	Avil
Tshz1	Adam28
Camk1d	Dapk2
Tshz3	Wwc1
Slit3	Akr1c19
Ablim1	Akr1c13
Rtn4	Shisa2
Abcg2	Rnf43
Ralgps2	Tro
Pygl	Capg
Hif1a	Crispld2
Abi2	Fos
Fgd1	Adar
Lef1	Mal2
Xpo1	Nod1
Kat6a	Myo3b
Colec12	Chrdl2
Cbl	Dcn
Satb1	Ahcyl2
Pkdcc	Dsp
Shroom4	Mgst3
Tmem26	Ly6h
Zeb1	Bhlhe40
B3gnt5	Rph3al
Coch	Epcam
Ddx17	Fibin
Gprc5b	Nrg2
Zfp516	Apod
Elac2	E030030I06Rik
Sned1	Zmym6
Alg10b	Olig3
Epdr1	Epsti1
Mfhas1	Sgcg
Pknox2	Rtp4
Cyyr1	Chst7
Asph	Ckmt1
Slc2a12	Rnf128
Tsc22d3	Prkd3
Spire1	Zbp1
Fbxo10	Mmp7
Ccbe1	Mbp
Slc4a7	Cpm
Wasf3	Myb
Col4a6	Gadd45g
Scara5	Cyb561
Pcsk5	C2cd4a
A330009N23Rik	Trpv6
St8sia4	Slco4a1
Synpo2	Lrig1
Lhfp	Rdh10
Shroom2	Scg2
Acss3	Gch1
Kcnd3	H60c
Atp7a	a
Tbl1x	Aoc1
Scmh1	Srrm2
Adamts15	Apol7a
Rbfox2	Kdm3a
Cyp3a57	Perp
Phc3	Pcsk6
Kbtbd11	Orc2
St3gal1	Pkp2
Dctd	Ppp2r2c
Tex15	Eya2
Myo10	Scgn
Sema5a	Plek2
Stard9	Myo1d
Fzd1	Igf2bp2
Zbtb43	Ifi44
D630045J12Rik	Padi2
Atp11c	Tmem30b
Aqp11	Anxa3
Igf1	Pycard
Ednrb	Slc35c1
Abat	Agr2
Tmem132c	Tmprss11b
Tmtc1	Clint1
Pdgfra	Tmem171
Ppfibp1	Rapgefl1
Ccnd2	Tmem44
Itm2a	Tmcc3
Fbxl3	Larp4b
Ano1	Git2
Atp2b4	Smpdl3a
Apbb1ip	Wnt7b
Msn	Pdgfa
Ddah1	Napepld
Crybg3	Galnt7
Myof	Pcolce2
Osr2	Dok7
Lrrc49	Slc14a1
Evc2	Ces2b
Medag	Vnn1
Tro	Lrrc1
Ptprc	Golm1
Cxcl12	Clu
Gpc3	Slc35g1
Ndufs5-ps	Ap1m2
Pcyt1b	Il20rb
Tcaf2	Slc9a3r1
Gas7	Serpinb5
Adar	Oxtr
Shisa3	Chgb
Tsku	Foxq1
Chst2	Nfkbiz
Lmo1	Prxl2a
Pdpr	Slc34a2
Mrc1	Slc6a13
Cpxm2	Il33
Ccdc170	Dennd2d
Spock2	Sod3
Areg	Edn2
Lrrn2	Topaz1
Apbb2	Adra2c
Prrc2b	Dio1
Ppm1e	Lamb3
Nog	Dcaf11
Prr5l	Mzt2
Cacng4	Adh1
Ilf3	Atp13a4
Extl3	Slk
Brd4	Bmp4
Crispld1	0610040J01Rik
Tnks	Ripk4
Tmem100	Fgfr2
Col15a1	Sh3yl1
Nxpe3	Tmbim1
Npm1	Sel1l3
Ankib1	Rfx5
Rnft2	Uox
Clcn5	Lig3
Kirrel	Fcgbp
Maoa	Lcorl
Heph	Tm2d3
Fzd4	Hsd17b11
Lipa	Il17re
Srrm2	Tmem176b
Pcx	Mpzl1
Fkbp5	Cyp2j6
Zmiz1	Clca1
Adamts1	Kcnk1
Orc2	Vgll4
Sfrp4	Krt8
Zbed3	Trim2
Secisbp2l	Oard1
Sbspon	Serpinb11
Slc2a3	Crtac1
Dzip1	Esyt3
Spon1	Gm13648
Abca5	Rhpn2
Cyp3a59	Hebp2
Cep170	Noxa1
Tram2	Wfs1
Fam111a	Ggt5
Hus1	Hmgxb4
Wrn	Htra1
Ms4a4b	Cdkl1
Ptch1	Timd2
Slc30a4	Eps8l2
Sult1d1	Fam174b
Rdx	Gipc1
Kcnip3	Usp43
Meig1	Fam20c
Gstm1	Chst8
Zc3hav1l	Slc28a3
Calca	Pmepa1
Tmod2	Gbp2b
Clstn1	Llgl2
Scin	Blnk
Zfyve9	Fuca2
Arsb	Plekha6
Sfrp2	Sftpd
Ptx3	Gtf2f2
Wfdc3	Rnpep
Slc19a1	Ampd3
Zfp451	Cxcl17
Abl1	Slc25a13
C2cd5	Lamc2
Fmod	Trim45
Tcf23	Ier3
Snai2	Thap4
Zdhhc2	Fbln1
Il13ra2	Gjb6
B4galt6	Gdpd1
Scara3	Gja3
Kat6b	Dgat2
Masp1	Pla2g7
Gbp3	Dlx5
Nkd2	Arhgap27
Zmpste24	Fer1l4
Maob	Rhbdl2
Cdh5	Bace2
Slk	Arg1
Mef2a	Zc3h11a
Tiam2	Tmem86a
Eng	Zfp445
Myc	Alox12e
Ggps1	Bcl2l15
Zfp423	Elf3
Mark2	Gabrp
Farp2	Krt5
Rfx5	Lrrc8d
Rgs2	Acss1
Ttc28	Rassf7
Itpripl1	Cd82
Znhit6	Srpx2
Pth1r	Faah
Smoc1	Scg5
St6galnac4	Krt14
Tspan11	St6galnac2
Dab2ip	Tex2
Pcbp3	Camk2b
Ago2	Aspa
Fam149a	Dhrs9
Sufu	Atp5g1
Syt15	Ddit4
Xist	Grb7
Sh3pxd2a	Col6a4
Prkd2	Ctsh
Zfp62	Sprr1a
Gamt	Upk3bl
Tgfb2	Cxadr
Klra8	Tmprss4
Fn1	Il18r1
Wnt6	Slc5a9
Col23a1	Dsg2
Fam83a	Card10
Ggta1	Chrnb1
Sntb2	Mib2
Fam43a	Asb4
Cox4i2	Fzd10os
Zhx1	Sdr42e1
Ccl2	Entpd8
Poglut1	Mlph
Rrp8	Tmem266
Cwh43	Tesc
Fut10	Stxbp2
Adcy3	Por
Ppm1f	Pla2g2e
Ntng2	Tacstd2
Srl	F2rl1
Ace	Acot11
Hps3	Gdap1l1
Tnpo1	Calml3
Zfp57	Pepd
Ogdhl	Sectm1b
Samd4	Dgka
Galnt1	Prss22
Hhipl1	Apol9a
Gfpt2	Igf2
Rnf157	Syt8
Ccr5	Ptpn18
Fbf1	Slc45a3
Pogz	Scgb3a1
Mr1	Mapkapk3
Ddi2	Rab17
Abcb1b	1700016K19Rik
Gzmb	Fxyd3
Ly75	Cmtm8
Per1	Arrdc1
Sorcs2	Trpv4
D430019H16Rik	Cxcl14
Zc3h11a	Rnf39
Spag9	Lgals3
Zfp142	Gal
Eif4e3	Als2cl
Slc6a2	Cx3cl1
Eml1	Smim6
Tacc1	Cldn4
Tdo2	Hsh2d
Sorbs3	Lpcat4
Tfpi	D630039A03Rik
Cpne1	Cldn7
Fstl1	Ftl1
Dram1	Ppp1r1b
Mtr	Padi4
Npl	Esrp2
Ciita	Galnt12
Zfp131	Nupr1
Gpr161	Tmem125
Sarnp	Mogat2
Prmt9	Phldb3
Tpx2	Padi1
Mad2l2	Gsr
Efnb3	Arhgef16
Matn2	Hbegf
Synm	Ovol2
Eif3j2	Fgfrl1
Fscn1	Sox7
Slfn3	St14
Igdcc4	Alpl
Mest	Tgif1
Usp2	Sgsm1
Atp1b1	Med24
Tac2	Krt18
Aplnr	Bspry
Aff1	Rgl3
Lif	Dio3os
Kank4	Rarres2
Hdhd2	Pigr
Simc1	Wnk2
Csf2rb2	Msln
Zfp266	Clta
Fads3	Adam9
Cd83	Mansc1
Isg20	Capn5
Ppp1r16b	Sfn
Spast	Gm3336
Notch3	Rab25
Orc6	D730003I15Rik
Inf2	Slc2a6
Acot11	Slc25a45
Shank3	Clec10a
Il15ra	Mmp23
Slc6a6	Ccl28
Amd1	Abca3
Kctd12	Tmprss6
Fkbp9	Gadd45b
Ubap2l	Hpn
Gxylt2	Evpl
Zbtb16	Rap1gap
Stra6	Smim22
Thra	Rorc
Soga1	Tmem40
Adamts7	Tspan1
Cacng7	Bnipl
Nynrin	Hnf1b
Morf4l1	Cfi
Cadm3	Tdrp
Slco2b1	Stard10
Il17rb	Sema3f
Pnkd	Casp6
Enpp4	Celsr2
Pdzd4	Cyp21a1
Bcorl1	Pde4c
Il2rb	Tnfsf13
Asl	Rab11fip4
F2r	Irak2
Sh3bp1	Atp6v0a4
Srgn	Tmem205
Heyl	Rab19
Zmym3	Cd24a
Man2a2	Ptpn6
Bgn	Cib1
Snai1	Zfp14
Klf15	Marveld3
Slc20a1	Uimc1
Lamc3	Serinc2
Camkk2	Kcnn4
Sult1a1	Slc44a4
Mical1	Prss8
Slc41a3	Slc44a2
Parvb	Fam3b
Rasgrp2	Tmc4
Gdf7	Dhx58
Armcx4	Pard6b
Pex11a	1110065P20Rik
Dusp2	Oasl1
Fmo1	Mycl
Smarcc2	Omp
Mst1r	Eif4e2
Gzmc	Osgin1
Rims3	Oas1g
Jag2	Foxj1
Palm	Oas2
Ptch2	Prr13
Pogk	Crabp2
Hdac6	Igsf9
Adamtsl4	Hgfac
Gzma	Tmem184c
Nos3	Cndp2
Ankle1	Myh14
Fasn	Cpt1c
Sall2	Alox5ap
Smim41	Gm13030
Scn2b	Lypd8
Prrg3	Tmem141
Tnfrsf22	Vmac
Tmem184c	Hook2
Obsl1	Gadd45a
Cpt1c	Myl4
Nfic	Prkab1
Scn4b	2010320M18Rik
Ppp1r3e	Ecel1
Serpina3n	Hoxb8
Nsg1	Resp18
Ptpn7	Rxrb
Mmp19	Lzts3
Nlgn3	Pglyrp1
Wfdc1	2810459M11Rik
Gprc5c	Epn3
Gimap4	Aqp5
Zbed6	Nfe2l3
Acp5	Camk2n1
Cyb561a3	Spint1
Id3	Apobec2
Micall1	Ano9
Dgkq	Gng5
Slc51a	Gprc5c
Pbld1	Cnksr1
Ctsw	1700001O22Rik
Pus7	Cox8b
Akna	Slc16a11
Bcl2a1d	Misp
Yod1	Prr15l
Fcgr3	Dkkl1
1810019D21Rik	Tuba4a
Slc7a8	S100a14
Hoxd11	Acp5
Stac2	Aldoc
Cln5	Cyb561a3
Cd248	Lsr
Pla2g10	Gprc5a
Zyx	Trpm4
Nme4	Nrtn
	Noxo1
	BC048679
	Krt7
	Mapk13
	Ifitm1
	Hsf1
	Kcnq1
	Gjb2
	Defb25
	Krt15
	Mdfi
	Kif19a
	Spint2
	Bco2
	Apbb1
	Ccl11
	Fut2
	Ddr1
	Tmem213
	Ormdl2
	Ceacam1
	Ogn
	Cox7a1
	Hspa1b
	Serpina9
	Ugt1a7c
	Slc26a4
	Pgpep1
	Cdkn2a
	Mfap4
	Tmem139
	Erbb3
	Kyat1
	Dhcr24
	Urah
	Rnf186
	Smagp
	Muc20
	Prap1
	Nme3
	Mvd
	Mfsd6l
	Magt1
	Fbxw9
	Ramp3
	Slc39a2
	Zfp467

## Sheet: Supplementary File 3c
Supplementary File 3c: Gene Ontology enrichment analysis of shared direct target genes of SMAD1/5 from the up-targets (Plotted in Figure 3E)
	ONTOLOGY	ID	Description	GeneRatio	BgRatio	pvalue	p.adjust	qvalue	geneID	Count
GO:0098609	BP	GO:0098609	cell-cell adhesion	43/433	878/28943	1.16962e-11	6.29721e-08	4.37806e-08	Cd47/Muc4/Klf4/Cdh1/Cadm4/Ptpru/Pkp3/Igsf5/Vtcn1/Fut9/Hes1/Ank3/Itga9/Slc7a11/Alcam/Igfbp2/Cldn2/Ptpn22/F11r/Jup/Slc39a8/Dsc2/Lama3/Wnt4/Myo10/Ctnnd1/Dsp/Epcam/Mbp/Myb/Perp/Pkp2/Pycard/Wnt7b/Vnn1/Il20rb/Nfkbiz/Bmp4/Sftpd/Arg1/Srpx2/Cxadr/Dsg2	43
GO:0048871	BP	GO:0048871	multicellular organismal homeostasis	34/433	607/28943	5.61031e-11	1.3438e-07	9.34263e-08	Arrdc3/Dio2/Pla2g4a/Muc4/Ffar4/Klf4/Scx/Cdh1/Iapp/Car2/Cftr/Map2k6/Grb10/Slc40a1/Zfp516/Cytl1/Aldh1a1/Slc39a8/Itgb6/Mbp/Gadd45g/Kdm3a/Napepld/Il20rb/Oxtr/Edn2/Wfs1/Slc28a3/Sftpd/Ampd3/Ctsh/Cxadr/Il18r1/Acot11	34
GO:0086042	BP	GO:0086042	cardiac muscle cell-cardiac muscle cell adhesion	6/433	7/28943	7.48777e-11	1.3438e-07	9.34263e-08	Jup/Dsc2/Dsp/Pkp2/Cxadr/Dsg2	6
GO:0060541	BP	GO:0060541	respiratory system development	22/433	267/28943	1.27588e-10	1.71734e-07	1.19396e-07	Atxn1/Six1/Msc/Hmga2/Cftr/Hes1/Slc7a11/Smpd3/Esrp1/Grhl2/Mycn/Itgb6/Rdh10/Agr2/Wnt7b/Pdgfa/Edn2/Bmp4/Fgfr2/Sftpd/Dlx5/Ctsh	22
GO:0030155	BP	GO:0030155	regulation of cell adhesion	39/433	812/28943	1.97239e-10	2.12387e-07	1.47659e-07	Cd47/Egfl6/Fermt1/Muc4/Gpm6b/Klf4/Cdh1/Ptpru/Vtcn1/Fut9/Hes1/Ank3/Nedd9/Igfbp2/Plet1/Ptpn22/F11r/Adgrg1/Jup/Lama3/Wnt4/Myo10/Epcam/Apod/Mbp/Myb/C2cd4a/Pycard/Agr2/Vnn1/Il20rb/Nfkbiz/Slk/Bmp4/Sftpd/Fbln1/Arg1/Tesc/Tacstd2	39
GO:0034330	BP	GO:0034330	cell junction organization	37/433	773/28943	6.47096e-10	5.80661e-07	4.03697e-07	Asic2/Gpm6b/Six1/Cdh1/Ngef/Pkp3/Fmr1/Ank3/Slc7a11/Micall2/Cldn10/Abi2/Cldn2/F11r/Jup/Grhl2/Wnt4/Wnt7a/Ppfibp1/Ctnnd1/Dsp/Nrg2/Apod/Perp/Pkp2/Wnt7b/Dok7/Oxtr/Slk/Fgfr2/Gjb6/Srpx2/Camk2b/Cxadr/Dsg2/Chrnb1/F2rl1	37
GO:0048729	BP	GO:0048729	tissue morphogenesis	34/433	697/28943	2.04304e-09	1.45517e-06	1.01169e-06	Fermt1/Msx2/Klf4/Scx/Six1/Cdh1/Hmga2/Zeb2/Car2/Hes1/Mdm4/Plet1/Esrp1/Aldh1a1/Grhl2/Lama3/Mycn/Wnt4/Wnt7a/Ctnnd1/Dsp/Rdh10/Pkp2/Wnt7b/Pdgfa/Slc9a3r1/Serpinb5/Foxq1/Bmp4/Ripk4/Fgfr2/Llgl2/Ctsh/Tacstd2	34
GO:0002934	BP	GO:0002934	desmosome organization	6/433	10/28943	2.16221e-09	1.45517e-06	1.01169e-06	Pkp3/Jup/Dsp/Perp/Pkp2/Dsg2	6
GO:0030029	BP	GO:0030029	actin filament-based process	37/433	822/28943	3.39792e-09	1.86668e-06	1.29778e-06	Cd47/Pam/Gpm6b/Cdh1/Ntf3/Myo1b/Ezr/Myo5c/Pls1/Phactr1/Nedd9/Krt19/Fzd10/Micall2/Fam171a1/Abi2/F11r/Jup/Dsc2/Wnt4/Avil/Capg/Myo3b/Dsp/Pkp2/Plek2/Myo1d/Pycard/Pdgfa/Slc9a3r1/Krt8/Rhpn2/Llgl2/Cxadr/Dsg2/Tacstd2/F2rl1	37
GO:0030324	BP	GO:0030324	lung development	19/433	236/28943	3.46708e-09	1.86668e-06	1.29778e-06	Atxn1/Hmga2/Cftr/Hes1/Slc7a11/Smpd3/Esrp1/Grhl2/Mycn/Itgb6/Rdh10/Agr2/Wnt7b/Pdgfa/Edn2/Bmp4/Fgfr2/Sftpd/Ctsh	19
GO:0030323	BP	GO:0030323	respiratory tube development	19/433	239/28943	4.27125e-09	1.94758e-06	1.35403e-06	Atxn1/Hmga2/Cftr/Hes1/Slc7a11/Smpd3/Esrp1/Grhl2/Mycn/Itgb6/Rdh10/Agr2/Wnt7b/Pdgfa/Edn2/Bmp4/Fgfr2/Sftpd/Ctsh	19
GO:0086073	BP	GO:0086073	bundle of His cell-Purkinje myocyte adhesion involved in cell communication	5/433	6/28943	4.34082e-09	1.94758e-06	1.35403e-06	Jup/Dsc2/Dsp/Pkp2/Dsg2	5
GO:0030334	BP	GO:0030334	regulation of cell migration	41/433	991/28943	5.27993e-09	2.1867e-06	1.52028e-06	Cd47/Fermt1/Klf4/Cdh1/Ntf3/Ptpru/Fut9/Phactr1/Nedd9/Smpd3/Plet1/Ptpn22/Adgrg1/Jup/Lama3/Wnt4/Wnt7a/Dapk2/Dcn/Apod/Mmp7/Padi2/Anxa3/Pycard/Pdgfa/Slc9a3r1/Il33/Edn2/Slk/Bmp4/Cxcl17/Lamc2/Fbln1/Pla2g7/Srpx2/Camk2b/Grb7/Ctsh/Card10/Tacstd2/F2rl1	41
GO:0002009	BP	GO:0002009	morphogenesis of an epithelium	30/433	588/28943	6.80583e-09	2.61733e-06	1.81966e-06	Fermt1/Msx2/Klf4/Six1/Cdh1/Hmga2/Zeb2/Car2/Hes1/Plet1/Esrp1/Aldh1a1/Grhl2/Lama3/Mycn/Wnt4/Wnt7a/Ctnnd1/Rdh10/Wnt7b/Pdgfa/Slc9a3r1/Serpinb5/Foxq1/Bmp4/Ripk4/Fgfr2/Llgl2/Ctsh/Tacstd2	30
GO:0045216	BP	GO:0045216	cell-cell junction organization	17/433	219/28943	3.97816e-08	1.4279e-05	9.92726e-06	Cdh1/Pkp3/Micall2/Cldn10/Abi2/Cldn2/F11r/Jup/Grhl2/Ctnnd1/Dsp/Perp/Pkp2/Gjb6/Cxadr/Dsg2/F2rl1	17
GO:0008544	BP	GO:0008544	epidermis development	22/433	367/28943	4.54903e-08	1.53075e-05	1.06423e-05	Fermt1/Msx2/Klf4/Ntf3/Barx2/Hes1/Pls1/Tnfrsf19/Esrp1/Grhl2/Mycn/Myo3b/Dsp/Pdgfa/Slc9a3r1/Foxq1/Bmp4/Fgfr2/Krt8/Krt5/Krt14/Sprr1a	22
GO:0000165	BP	GO:0000165	MAPK cascade	34/433	808/28943	7.62935e-08	2.41626e-05	1.67987e-05	Ffar4/Klf4/Ntf3/Iapp/Ezr/Zeb2/Gpr39/Mid1/Map2k6/Unc5cl/Grb10/Dynlt1b/Tnfrsf19/Fzd10/Ptpn22/Wnt7a/Avpi1/Wwc1/Nod1/Mbp/Gadd45g/Scg2/Pycard/Wnt7b/Pdgfa/Slc9a3r1/Oxtr/Adra2c/Bmp4/Fgfr2/Cxcl17/Fbln1/Ctsh/F2rl1	34
GO:0030036	BP	GO:0030036	actin cytoskeleton organization	32/433	737/28943	9.23461e-08	2.76218e-05	1.92037e-05	Cd47/Pam/Gpm6b/Cdh1/Ntf3/Myo1b/Ezr/Myo5c/Pls1/Phactr1/Nedd9/Krt19/Fzd10/Micall2/Fam171a1/Abi2/F11r/Wnt4/Avil/Capg/Myo3b/Plek2/Myo1d/Pycard/Pdgfa/Slc9a3r1/Krt8/Rhpn2/Llgl2/Cxadr/Tacstd2/F2rl1	32
GO:0034113	BP	GO:0034113	heterotypic cell-cell adhesion	9/433	57/28943	1.64707e-07	4.66728e-05	3.24486e-05	Klf4/Jup/Dsc2/Dsp/Mbp/Perp/Pkp2/Cxadr/Dsg2	9
GO:0010942	BP	GO:0010942	positive regulation of cell death	30/433	690/28943	2.2868e-07	6.13133e-05	4.26273e-05	Ppp2r2b/Pla2g4a/Msx2/Bcl2l14/Hmga2/Iapp/Map2k6/Casp1/Aldh1a1/Fndc1/Mycn/Inhbb/Rnf183/Dapk2/Fos/Nod1/Zbp1/Gadd45g/Pycard/Clu/Slc9a3r1/Slc6a13/Slk/Bmp4/Hebp2/Htra1/Camk2b/Atp5g1/Ddit4/Ctsh	30
GO:0030855	BP	GO:0030855	epithelial cell differentiation	31/433	730/28943	2.39149e-07	6.13133e-05	4.26273e-05	Msx2/Klf4/Six1/Cdh1/Ezr/Zeb2/Cftr/Hes1/Pls1/Krt19/Abi2/Esrp1/F11r/Grhl2/Mycn/Wnt4/Ctnnd1/Myo3b/Dsp/Agr2/Slc9a3r1/Bmp4/Fgfr2/Krt8/Fam20c/Dlx5/Elf3/Krt5/Krt14/Sprr1a/F2rl1	31
GO:0007167	BP	GO:0007167	enzyme-linked receptor protein signaling pathway	37/433	987/28943	3.56255e-07	8.71853e-05	6.06145e-05	Nrep/Fermt1/Msx2/Atxn1/Scx/Ntf3/Cadm4/Ngef/Zeb2/Grem2/Hes1/Grb10/Ltbp1/Nedd9/Igfbp2/Smpd3/Wnt4/Inhbb/Itgb6/Shisa2/Fos/Chrdl2/Dcn/Nrg2/Apod/Agr2/Pdgfa/Slc9a3r1/Bmp4/Fgfr2/Htra1/Gipc1/Fam20c/Pmepa1/Blnk/Dlx5/Ddit4	37
GO:0010817	BP	GO:0010817	regulation of hormone levels	27/433	595/28943	4.07499e-07	9.53903e-05	6.63189e-05	Dio2/Ffar4/Chga/Hmga2/Gpr39/Akr1c14/Cftr/Plb1/Stc2/Smpd3/Aldh1a1/Cyb5r4/Wnt4/Inhbb/Rph3al/Trpv6/Slco4a1/Rdh10/Pcsk6/Edn2/Dio1/Adh1/Hsd17b11/Chst8/Scg5/Dhrs9/Por	27
GO:0034109	BP	GO:0034109	homotypic cell-cell adhesion	10/433	84/28943	5.21291e-07	0.00011456	7.96463e-05	Ptpru/Ank3/Slc7a11/F11r/Jup/Dsc2/Dsp/Pkp2/Cxadr/Dsg2	10
GO:0098911	BP	GO:0098911	regulation of ventricular cardiac muscle cell action potential	5/433	12/28943	5.31946e-07	0.00011456	7.96463e-05	Jup/Dsc2/Dsp/Pkp2/Dsg2	5
GO:0048286	BP	GO:0048286	lung alveolus development	9/433	66/28943	6.01752e-07	0.000120994	8.41194e-05	Atxn1/Slc7a11/Smpd3/Itgb6/Pdgfa/Edn2/Bmp4/Fgfr2/Sftpd	9
GO:0022407	BP	GO:0022407	regulation of cell-cell adhesion	24/433	497/28943	6.06766e-07	0.000120994	8.41194e-05	Cd47/Muc4/Klf4/Cdh1/Ptpru/Vtcn1/Fut9/Hes1/Ank3/Igfbp2/Ptpn22/F11r/Wnt4/Myo10/Epcam/Mbp/Myb/Pycard/Vnn1/Il20rb/Nfkbiz/Bmp4/Sftpd/Arg1	24
GO:0042445	BP	GO:0042445	hormone metabolic process	16/433	239/28943	7.41361e-07	0.000142553	9.91083e-05	Dio2/Akr1c14/Plb1/Stc2/Aldh1a1/Wnt4/Slco4a1/Rdh10/Pcsk6/Dio1/Adh1/Hsd17b11/Chst8/Scg5/Dhrs9/Por	16
GO:0042391	BP	GO:0042391	regulation of membrane potential	23/433	469/28943	8.0045e-07	0.000148608	0.000103318	Asic2/Atxn1/Fmr1/Gpr39/Cftr/Ank3/Dpp6/Casp1/Jup/Slc39a8/Dsc2/Wnt7a/Ltf/Dcn/Dsp/Pkp2/Kcnk1/Hebp2/Gabrp/Atp5g1/Cxadr/Dsg2/Chrnb1	23
GO:1901615	BP	GO:1901615	organic hydroxy compound metabolic process	25/433	551/28943	1.10239e-06	0.000191717	0.000133289	Dio2/Pla2g4a/Mogat1/Zeb2/Rnf180/Ddc/Akr1c14/Cftr/Slc7a11/Plb1/Slc27a2/Aldh1a1/Wnt4/Slco4a1/Rdh10/Gch1/a/Napepld/Dio1/Adh1/Gipc1/Gdpd1/Dgat2/Dhrs9/Por	25
GO:0001659	BP	GO:0001659	temperature homeostasis	14/433	189/28943	1.10387e-06	0.000191717	0.000133289	Arrdc3/Dio2/Ffar4/Map2k6/Grb10/Zfp516/Aldh1a1/Gadd45g/Kdm3a/Napepld/Oxtr/Edn2/Il18r1/Acot11	14
GO:0034329	BP	GO:0034329	cell junction assembly	22/433	445/28943	1.21703e-06	0.000204766	0.000142361	Asic2/Gpm6b/Six1/Cdh1/Pkp3/Micall2/Cldn10/Abi2/Cldn2/F11r/Jup/Grhl2/Wnt4/Wnt7a/Ctnnd1/Nrg2/Apod/Pkp2/Oxtr/Slk/Gjb6/Srpx2	22
GO:0086069	BP	GO:0086069	bundle of His cell to Purkinje myocyte communication	5/433	14/28943	1.31178e-06	0.000211574	0.000147094	Jup/Dsc2/Dsp/Pkp2/Dsg2	5
GO:1990845	BP	GO:1990845	adaptive thermogenesis	13/433	165/28943	1.33609e-06	0.000211574	0.000147094	Arrdc3/Dio2/Ffar4/Gpr39/Map2k6/Grb10/Zfp516/Aldh1a1/Gadd45g/Kdm3a/Oxtr/Il18r1/Acot11	13
GO:0043410	BP	GO:0043410	positive regulation of MAPK cascade	24/433	526/28943	1.642e-06	0.000252587	0.000175608	Ffar4/Ntf3/Iapp/Zeb2/Gpr39/Mid1/Map2k6/Unc5cl/Tnfrsf19/Fzd10/Ptpn22/Wnt7a/Avpi1/Wwc1/Nod1/Gadd45g/Pycard/Wnt7b/Pdgfa/Adra2c/Bmp4/Fgfr2/Cxcl17/F2rl1	24
GO:0090287	BP	GO:0090287	regulation of cellular response to growth factor stimulus	18/433	318/28943	1.73858e-06	0.000260014	0.000180772	Nrep/Fermt1/Msx2/Cadm4/Zeb2/Grem2/Hes1/Grb10/Ltbp1/Wnt4/Shisa2/Chrdl2/Dcn/Bmp4/Htra1/Gipc1/Fam20c/Pmepa1	18
GO:0061138	BP	GO:0061138	morphogenesis of a branching epithelium	15/433	229/28943	2.15274e-06	0.000307078	0.000213492	Msx2/Six1/Cdh1/Hmga2/Esrp1/Grhl2/Mycn/Wnt4/Rdh10/Pdgfa/Bmp4/Fgfr2/Llgl2/Ctsh/Tacstd2	15
GO:0043588	BP	GO:0043588	skin development	18/433	323/28943	2.16734e-06	0.000307078	0.000213492	Arrdc3/Fermt1/Msx2/Klf4/Barx2/Tnfrsf19/Jup/Grhl2/Wnt7a/Itgb6/Dsp/Pdgfa/Foxq1/Fgfr2/Krt8/Krt5/Krt14/Sprr1a	18
GO:0120161	BP	GO:0120161	regulation of cold-induced thermogenesis	12/433	147/28943	2.34874e-06	0.000318456	0.000221402	Arrdc3/Dio2/Ffar4/Map2k6/Grb10/Zfp516/Aldh1a1/Gadd45g/Kdm3a/Oxtr/Il18r1/Acot11	12
GO:0008015	BP	GO:0008015	blood circulation	24/433	538/28943	2.4231e-06	0.000318456	0.000221402	Asic2/Chga/Cftr/Map2k6/Mdm4/Smpd3/F11r/Jup/Dsc2/Dsp/Sgcg/C2cd4a/Gch1/Pkp2/Oxtr/Sod3/Edn2/Adra2c/Rnpep/Ier3/Faah/Cxadr/Dsg2/F2rl1	24
GO:0098901	BP	GO:0098901	regulation of cardiac muscle cell action potential	6/433	27/28943	2.4563e-06	0.000318456	0.000221402	Jup/Dsc2/Dsp/Pkp2/Cxadr/Dsg2	6
GO:0019752	BP	GO:0019752	carboxylic acid metabolic process	34/433	942/28943	2.48424e-06	0.000318456	0.000221402	Pam/Pla2g4a/Cryl1/Hmgcll1/Ddc/Akr1c14/Slc7a11/Me1/Bcat1/Slc27a2/Lpin3/Aldh1a1/Slc39a8/Mgst3/Rdh10/Ces2b/Vnn1/Edn2/Dio1/Adh1/Cyp2j6/Ggt5/Ier3/Thap4/Dgat2/Arg1/Alox12e/Acss1/Faah/Aspa/Dhrs9/Ddit4/Por/Acot11	34
GO:0043408	BP	GO:0043408	regulation of MAPK cascade	29/433	735/28943	2.54339e-06	0.000318457	0.000221403	Ffar4/Klf4/Ntf3/Iapp/Ezr/Zeb2/Gpr39/Mid1/Map2k6/Unc5cl/Dynlt1b/Tnfrsf19/Fzd10/Ptpn22/Wnt7a/Avpi1/Wwc1/Nod1/Gadd45g/Pycard/Wnt7b/Pdgfa/Slc9a3r1/Adra2c/Bmp4/Fgfr2/Cxcl17/Fbln1/F2rl1	29
GO:0001816	BP	GO:0001816	cytokine production	32/433	861/28943	2.70332e-06	0.000323792	0.000225112	Cd47/Fermt1/Ffar4/Klf4/Vtcn1/Ezr/Ltbp1/Spon2/Ptpn22/Serpinb7/F11r/Casp1/Adgrg1/Inhbb/Ltf/Itgb6/Nod1/Apod/Rnf128/Mbp/Gadd45g/Pycard/Clu/Il20rb/Il33/Cyp2j6/Sftpd/Cxcl17/Fbln1/Arg1/Il18r1/F2rl1	32
GO:0106106	BP	GO:0106106	cold-induced thermogenesis	12/433	149/28943	2.70629e-06	0.000323792	0.000225112	Arrdc3/Dio2/Ffar4/Map2k6/Grb10/Zfp516/Aldh1a1/Gadd45g/Kdm3a/Oxtr/Il18r1/Acot11	12
GO:0071363	BP	GO:0071363	cellular response to growth factor stimulus	27/433	662/28943	3.0849e-06	0.000361068	0.000251028	Nrep/Fermt1/Msx2/Klf4/Scx/Ntf3/Cadm4/Zeb2/Grem2/Hes1/Grb10/Ltbp1/Smpd3/Wnt4/Itgb6/Shisa2/Fos/Chrdl2/Dcn/Bmp4/Fgfr2/Htra1/Gipc1/Fam20c/Pmepa1/Dlx5/Ddit4	27
GO:0001817	BP	GO:0001817	regulation of cytokine production	30/433	787/28943	3.39048e-06	0.00038839	0.000270023	Cd47/Fermt1/Ffar4/Klf4/Vtcn1/Ezr/Ltbp1/Spon2/Ptpn22/Serpinb7/F11r/Casp1/Inhbb/Ltf/Itgb6/Nod1/Apod/Rnf128/Mbp/Pycard/Clu/Il20rb/Il33/Cyp2j6/Sftpd/Cxcl17/Fbln1/Arg1/Il18r1/F2rl1	30
GO:0043436	BP	GO:0043436	oxoacid metabolic process	34/433	960/28943	3.7369e-06	0.000419155	0.000291412	Pam/Pla2g4a/Cryl1/Hmgcll1/Ddc/Akr1c14/Slc7a11/Me1/Bcat1/Slc27a2/Lpin3/Aldh1a1/Slc39a8/Mgst3/Rdh10/Ces2b/Vnn1/Edn2/Dio1/Adh1/Cyp2j6/Ggt5/Ier3/Thap4/Dgat2/Arg1/Alox12e/Acss1/Faah/Aspa/Dhrs9/Ddit4/Por/Acot11	34
GO:0009913	BP	GO:0009913	epidermal cell differentiation	15/433	242/28943	4.24025e-06	0.000465908	0.000323917	Msx2/Klf4/Hes1/Pls1/Esrp1/Grhl2/Mycn/Myo3b/Dsp/Slc9a3r1/Bmp4/Krt8/Krt5/Krt14/Sprr1a	15
GO:0070848	BP	GO:0070848	response to growth factor	27/433	676/28943	4.5312e-06	0.000481582	0.000334814	Nrep/Fermt1/Msx2/Klf4/Scx/Ntf3/Cadm4/Zeb2/Grem2/Hes1/Grb10/Ltbp1/Smpd3/Wnt4/Itgb6/Shisa2/Fos/Chrdl2/Dcn/Bmp4/Fgfr2/Htra1/Gipc1/Fam20c/Pmepa1/Dlx5/Ddit4	27
GO:0006082	BP	GO:0006082	organic acid metabolic process	34/433	969/28943	4.56179e-06	0.000481582	0.000334814	Pam/Pla2g4a/Cryl1/Hmgcll1/Ddc/Akr1c14/Slc7a11/Me1/Bcat1/Slc27a2/Lpin3/Aldh1a1/Slc39a8/Mgst3/Rdh10/Ces2b/Vnn1/Edn2/Dio1/Adh1/Cyp2j6/Ggt5/Ier3/Thap4/Dgat2/Arg1/Alox12e/Acss1/Faah/Aspa/Dhrs9/Ddit4/Por/Acot11	34
GO:0007043	BP	GO:0007043	cell-cell junction assembly	12/433	158/28943	4.97917e-06	0.000515536	0.00035842	Cdh1/Pkp3/Micall2/Cldn10/Abi2/Cldn2/F11r/Jup/Grhl2/Ctnnd1/Pkp2/Gjb6	12
GO:0097435	BP	GO:0097435	supramolecular fiber organization	30/433	807/28943	5.54943e-06	0.000552769	0.000384306	Cd47/Scx/Myo1b/Iapp/Ezr/Mid1/Myo5c/Pls1/Phactr1/Nedd9/Krt19/Micall2/Fam171a1/Abi2/F11r/Wnt4/Avil/Capg/Dsp/Pkp2/Myo1d/Pycard/Clu/Slk/Krt8/Rhpn2/Krt5/Krt14/Tacstd2/F2rl1	30
GO:0032970	BP	GO:0032970	regulation of actin filament-based process	20/433	416/28943	5.61996e-06	0.000552769	0.000384306	Cd47/Pam/Gpm6b/Ntf3/Fzd10/Abi2/F11r/Jup/Dsc2/Wnt4/Avil/Capg/Myo3b/Dsp/Pkp2/Pycard/Rhpn2/Dsg2/Tacstd2/F2rl1	20
GO:0060249	BP	GO:0060249	anatomical structure homeostasis	18/433	346/28943	5.64679e-06	0.000552769	0.000384306	Pla2g4a/Muc4/Scx/Iapp/Car2/Gpr39/Cytl1/Aldh1a1/Slc39a8/Immt/Itgb6/Mbp/Scgn/Il20rb/Slc28a3/Sftpd/Ctsh/Cxadr	18
GO:0001763	BP	GO:0001763	morphogenesis of a branching structure	15/433	249/28943	5.99124e-06	0.000576015	0.000400467	Msx2/Six1/Cdh1/Hmga2/Esrp1/Grhl2/Mycn/Wnt4/Rdh10/Pdgfa/Bmp4/Fgfr2/Llgl2/Ctsh/Tacstd2	15
GO:0001501	BP	GO:0001501	skeletal system development	24/433	570/28943	6.44488e-06	0.000605581	0.000421023	Ttc9/Msx2/Scx/Six1/Hmga2/Barx2/Map2k6/Smpd3/Cytl1/Grhl2/Mycn/Wnt7a/Ltf/Itgb6/Chrdl2/Rdh10/Wnt7b/Pdgfa/Bmp4/Fgfr2/Fam20c/Trim45/Dlx5/Por	24
GO:0070371	BP	GO:0070371	ERK1 and ERK2 cascade	18/433	350/28943	6.61121e-06	0.000605581	0.000421023	Ffar4/Klf4/Iapp/Ezr/Grb10/Dynlt1b/Ptpn22/Nod1/Pycard/Pdgfa/Slc9a3r1/Oxtr/Bmp4/Fgfr2/Cxcl17/Fbln1/Ctsh/F2rl1	18
GO:0003013	BP	GO:0003013	circulatory system process	24/433	571/28943	6.6362e-06	0.000605581	0.000421023	Asic2/Chga/Cftr/Map2k6/Mdm4/Smpd3/F11r/Jup/Dsc2/Dsp/Sgcg/C2cd4a/Gch1/Pkp2/Oxtr/Sod3/Edn2/Adra2c/Rnpep/Ier3/Faah/Cxadr/Dsg2/F2rl1	24
GO:0043583	BP	GO:0043583	ear development	15/433	254/28943	7.61023e-06	0.000682892	0.000474772	Six1/Cdh1/Hes1/Pls1/Esrp1/Cytl1/Mycn/Myo3b/Lrig1/Rdh10/Slc9a3r1/Bmp4/Fgfr2/Gjb6/Dlx5	15
GO:0098900	BP	GO:0098900	regulation of action potential	8/433	68/28943	7.93379e-06	0.000700254	0.000486843	Fmr1/Ank3/Jup/Dsc2/Dsp/Pkp2/Cxadr/Dsg2	8
GO:0060425	BP	GO:0060425	lung morphogenesis	8/433	69/28943	8.85814e-06	0.000769229	0.000534797	Hmga2/Esrp1/Grhl2/Rdh10/Wnt7b/Bmp4/Fgfr2/Ctsh	8
GO:0045785	BP	GO:0045785	positive regulation of cell adhesion	22/433	510/28943	1.07538e-05	0.000919022	0.000638938	Cd47/Egfl6/Fermt1/Cdh1/Ptpru/Vtcn1/Hes1/Ank3/Nedd9/Igfbp2/Ptpn22/F11r/Adgrg1/Jup/Wnt4/Myo10/Myb/Pycard/Agr2/Vnn1/Nfkbiz/Fbln1	22
GO:0034308	BP	GO:0034308	primary alcohol metabolic process	9/433	93/28943	1.09579e-05	0.000921831	0.000640891	Akr1c14/Plb1/Aldh1a1/Wnt4/Rdh10/Napepld/Adh1/Gdpd1/Dhrs9	9
GO:0010038	BP	GO:0010038	response to metal ion	16/433	296/28943	1.15899e-05	0.000960004	0.00066743	Pam/Pla2g4a/Cpne8/Cdh1/Gpr39/Ank3/Cp/Smpd3/Slc40a1/Fos/Fibin/Trpv6/Aoc1/Sod3/Slc25a13/Camk2b	16
GO:2001233	BP	GO:2001233	regulation of apoptotic signaling pathway	19/433	401/28943	1.17873e-05	0.000961559	0.000668512	Deptor/Bcl2l14/Mdm4/Wnt4/Inhbb/Rnf183/Dapk2/Scg2/Eya2/Pycard/Vnn1/Clu/Slc9a3r1/Bmp4/Tmbim1/Wfs1/Ier3/Camk2b/Ctsh	19
GO:0051604	BP	GO:0051604	protein maturation	18/433	367/28943	1.25797e-05	0.00101088	0.000702802	Tspan33/Cdh1/Fmr1/Sec11c/Casp1/Ctnnd1/Cpm/Perp/Pcsk6/Pycard/Chst8/Rnpep/Fbln1/Bace2/Scg5/Ctsh/Tmprss4/Tesc	18
GO:0002159	BP	GO:0002159	desmosome assembly	3/433	4/28943	1.3154e-05	0.00104148	0.000724079	Pkp3/Jup/Pkp2	3
GO:0061448	BP	GO:0061448	connective tissue development	16/433	302/28943	1.48535e-05	0.00115901	0.000805784	Arrdc3/Msx2/Scx/Hmga2/Barx2/Smpd3/Zfp516/Serpinb7/Cytl1/Mycn/Wnt7a/Chrdl2/Wnt7b/Bmp4/Dgat2/Por	16
GO:0044087	BP	GO:0044087	regulation of cellular component biogenesis	33/433	983/28943	1.55584e-05	0.00119667	0.000831967	Cd47/Asic2/Fermt1/Gpm6b/Chga/Six1/Fmr1/Ezr/Hes1/Snx7/Smpd3/Abi2/F11r/Wnt4/Wnt7a/Myo10/Avil/Capg/Myo3b/Nrg2/Apod/Plek2/Pycard/Clu/Oxtr/Slk/Sh3yl1/Rhpn2/Eps8l2/Pmepa1/Srpx2/Tacstd2/F2rl1	33
GO:0060441	BP	GO:0060441	epithelial tube branching involved in lung morphogenesis	6/433	37/28943	1.6999e-05	0.00128905	0.000896198	Hmga2/Esrp1/Rdh10/Bmp4/Fgfr2/Ctsh	6
GO:0032963	BP	GO:0032963	collagen metabolic process	10/433	124/28943	1.81239e-05	0.00135526	0.00094223	Scx/Ltbp1/Smpd3/Serpinb7/Wnt4/Mmp7/Bmp4/Cyp2j6/Arg1/Pepd	10
GO:0042060	BP	GO:0042060	wound healing	18/433	380/28943	2.00165e-05	0.00147629	0.00102637	Fermt1/Pla2g4a/Msx2/Cadm4/Slc7a11/Plet1/Tspan8/F11r/Wnt4/Wnt7a/Itgb6/Tec/Dsp/Pdgfa/Adra2c/Fbln1/Cxadr/F2rl1	18
GO:0032964	BP	GO:0032964	collagen biosynthetic process	7/433	57/28943	2.21683e-05	0.00160249	0.00111411	Scx/Ltbp1/Serpinb7/Wnt4/Bmp4/Cyp2j6/Arg1	7
GO:0018958	BP	GO:0018958	phenol-containing compound metabolic process	10/433	127/28943	2.2323e-05	0.00160249	0.00111411	Dio2/Zeb2/Rnf180/Ddc/Slc7a11/Slco4a1/Gch1/a/Dio1/Gipc1	10
GO:0050900	BP	GO:0050900	leukocyte migration	18/433	385/28943	2.37899e-05	0.00168533	0.0011717	Cd47/Chga/Fut9/Itga9/Smpd3/Ptpn22/F11r/Dapk2/Apod/Scg2/Padi2/Pycard/Il33/Edn2/Cxcl17/Pla2g7/Cxadr/F2rl1	18
GO:0045669	BP	GO:0045669	positive regulation of osteoblast differentiation	8/433	79/28943	2.42657e-05	0.00169671	0.00117961	Msx2/Ffar4/Wnt4/Ltf/Wnt7b/Bmp4/Fam20c/Dlx5	8
GO:0009395	BP	GO:0009395	phospholipid catabolic process	7/433	58/28943	2.48893e-05	0.00170945	0.00118847	Pla2g4a/Plb1/Smpd3/Smpdl3a/Napepld/Gdpd1/Pla2g7	7
GO:0006820	BP	GO:0006820	anion transport	21/433	500/28943	2.52072e-05	0.00170945	0.00118847	Cd47/Pla2g4a/Slc16a14/Car2/Cftr/Map2k6/Slc7a11/Ano4/Stc2/Slc39a8/Slco4a1/Slc9a3r1/Slc34a2/Slc6a13/Clca1/Gipc1/Slc25a13/Arg1/Gabrp/Lrrc8d/Pla2g2e	21
GO:0032787	BP	GO:0032787	monocarboxylic acid metabolic process	25/433	661/28943	2.54004e-05	0.00170945	0.00118847	Pam/Pla2g4a/Cryl1/Akr1c14/Me1/Slc27a2/Lpin3/Aldh1a1/Rdh10/Ces2b/Vnn1/Edn2/Adh1/Cyp2j6/Ggt5/Ier3/Dgat2/Alox12e/Acss1/Faah/Aspa/Dhrs9/Ddit4/Por/Acot11	25
GO:0022612	BP	GO:0022612	gland morphogenesis	11/433	157/28943	2.6224e-05	0.00174308	0.00121186	Msx2/Cdh1/Esrp1/Wnt4/Ctnnd1/Pdgfa/Slc9a3r1/Serpinb5/Bmp4/Fgfr2/Elf3	11
GO:0086001	BP	GO:0086001	cardiac muscle cell action potential	7/433	59/28943	2.78796e-05	0.00183053	0.00127265	Ank3/Jup/Dsc2/Dsp/Pkp2/Cxadr/Dsg2	7
GO:0016485	BP	GO:0016485	protein processing	15/433	285/28943	2.94988e-05	0.00190265	0.00132279	Cdh1/Fmr1/Sec11c/Casp1/Ctnnd1/Cpm/Perp/Pcsk6/Pycard/Chst8/Rnpep/Bace2/Scg5/Ctsh/Tmprss4	15
GO:0097190	BP	GO:0097190	apoptotic signaling pathway	24/433	626/28943	2.96847e-05	0.00190265	0.00132279	Deptor/Bcl2l14/Mdm4/Casp1/Wnt4/Inhbb/Rnf183/Dapk2/Scg2/Perp/Eya2/Pycard/Vnn1/Clu/Slc9a3r1/Il33/Bmp4/Tmbim1/Krt8/Wfs1/Ier3/Camk2b/Ddit4/Ctsh	24
GO:0048598	BP	GO:0048598	embryonic morphogenesis	25/433	668/28943	3.01803e-05	0.00191166	0.00132905	Msx2/Klf4/Scx/Six1/Hmga2/Zeb2/Grem2/Hes1/Pls1/Aldh1a1/Grhl2/Mycn/Wnt4/Wnt7a/Myo3b/Mbp/Lrig1/Rdh10/Wnt7b/Slc9a3r1/Bmp4/Fgfr2/Llgl2/Gjb6/Dlx5	25
GO:0001894	BP	GO:0001894	tissue homeostasis	15/433	286/28943	3.07138e-05	0.00192283	0.00133682	Pla2g4a/Muc4/Scx/Iapp/Car2/Cytl1/Aldh1a1/Slc39a8/Itgb6/Mbp/Il20rb/Slc28a3/Sftpd/Ctsh/Cxadr	15
GO:0048839	BP	GO:0048839	inner ear development	13/433	221/28943	3.18415e-05	0.00197051	0.00136997	Six1/Cdh1/Hes1/Pls1/Esrp1/Cytl1/Mycn/Myo3b/Lrig1/Slc9a3r1/Bmp4/Fgfr2/Dlx5	13
GO:0008610	BP	GO:0008610	lipid biosynthetic process	25/433	671/28943	3.24666e-05	0.00198637	0.001381	Pam/Pla2g4a/Mogat1/Dctn6/Hmgcll1/Fut9/Cftr/Slc27a2/Smpd3/Lpin3/Aldh1a1/Wnt4/Avil/Rdh10/Pdgfa/Edn2/Sh3yl1/Hsd17b11/Ggt5/Dgat2/Alox12e/Acss1/Dhrs9/Sdr42e1/Por	25
GO:0042491	BP	GO:0042491	inner ear auditory receptor cell differentiation	7/433	61/28943	3.47495e-05	0.00210215	0.00146149	Hes1/Pls1/Esrp1/Mycn/Myo3b/Slc9a3r1/Bmp4	7
GO:0050801	BP	GO:0050801	ion homeostasis	24/433	635/28943	3.72082e-05	0.00222588	0.00154751	Chga/Steap1/Car2/Gpr39/Cftr/Ank3/Slc7a11/Stc2/Cp/Car12/Slc40a1/Slc39a8/Immt/Ltf/Cyb561/Trpv6/Scgn/Slc35g1/Slc9a3r1/Slc34a2/Edn2/Atp13a4/Wfs1/Tesc	24
GO:0010810	BP	GO:0010810	regulation of cell-substrate adhesion	13/433	225/28943	3.83514e-05	0.00226905	0.00157753	Egfl6/Fermt1/Muc4/Gpm6b/Nedd9/Plet1/Jup/Wnt4/Apod/Agr2/Slk/Fbln1/Tacstd2	13
GO:0060348	BP	GO:0060348	bone development	14/433	259/28943	4.0498e-05	0.00237002	0.00164772	Ttc9/Msx2/Scx/Map2k6/Smpd3/Ltf/Itgb6/Pdgfa/Bmp4/Fgfr2/Fam20c/Trim45/Dlx5/Por	14
GO:0086065	BP	GO:0086065	cell communication involved in cardiac conduction	6/433	43/28943	4.13264e-05	0.00239249	0.00166335	Jup/Dsc2/Dsp/Pkp2/Cxadr/Dsg2	6
GO:0032536	BP	GO:0032536	regulation of cell projection size	4/433	14/28943	4.39103e-05	0.00249518	0.00173475	Ezr/Pls1/Wnt7a/Wnt7b	4
GO:0048705	BP	GO:0048705	skeletal system morphogenesis	14/433	261/28943	4.40272e-05	0.00249518	0.00173475	Msx2/Scx/Six1/Barx2/Smpd3/Grhl2/Mycn/Wnt7a/Ltf/Rdh10/Bmp4/Fgfr2/Dlx5/Por	14
GO:0140448	BP	GO:0140448	signaling receptor ligand precursor processing	5/433	27/28943	4.50575e-05	0.00252697	0.00175685	Casp1/Pcsk6/Chst8/Bace2/Scg5	5
GO:0032874	BP	GO:0032874	positive regulation of stress-activated MAPK cascade	10/433	138/28943	4.56273e-05	0.00253255	0.00176073	Mid1/Unc5cl/Tnfrsf19/Wnt7a/Nod1/Gadd45g/Pycard/Wnt7b/Bmp4/F2rl1	10
GO:0090066	BP	GO:0090066	regulation of anatomical structure size	22/433	562/28943	4.67102e-05	0.0025662	0.00178412	Asic2/Deptor/Chga/Ezr/Cftr/Pls1/Smpd3/Wnt7a/Avil/Capg/Myo3b/Gch1/Pycard/Wnt7b/Slc9a3r1/Oxtr/Sod3/Edn2/Adra2c/Faah/Atp5g1/F2rl1	22
GO:0007178	BP	GO:0007178	transmembrane receptor protein serine/threonine kinase signaling pathway	18/433	407/28943	4.90407e-05	0.00266702	0.00185421	Nrep/Fermt1/Msx2/Scx/Zeb2/Grem2/Hes1/Ltbp1/Smpd3/Inhbb/Itgb6/Fos/Chrdl2/Bmp4/Htra1/Gipc1/Pmepa1/Dlx5	18
GO:0031589	BP	GO:0031589	cell-substrate adhesion	17/433	371/28943	5.11679e-05	0.00274879	0.00191106	Egfl6/Fermt1/Muc4/Gpm6b/Itga9/Nedd9/Micall2/Plet1/Jup/Wnt4/Itgb6/Apod/Agr2/Lamb3/Slk/Fbln1/Tacstd2	17
GO:0070304	BP	GO:0070304	positive regulation of stress-activated protein kinase signaling cascade	10/433	140/28943	5.15654e-05	0.00274879	0.00191106	Mid1/Unc5cl/Tnfrsf19/Wnt7a/Nod1/Gadd45g/Pycard/Wnt7b/Bmp4/F2rl1	10
GO:0031532	BP	GO:0031532	actin cytoskeleton reorganization	9/433	113/28943	5.2308e-05	0.00276104	0.00191958	Cdh1/Ntf3/Ezr/Phactr1/Nedd9/Micall2/F11r/Plek2/Cxadr	9
GO:0030001	BP	GO:0030001	metal ion transport	30/433	911/28943	5.39176e-05	0.00277822	0.00193152	Asic2/Myo1b/Fmr1/Iapp/Gpr39/Cftr/Hes1/Ank3/Stc2/Trpm6/Cp/Dpp6/Slc40a1/Ptpn22/Slc39a8/Ltf/Myb/Trpv6/Slc35g1/Slc9a3r1/Slc34a2/Slc6a13/Bmp4/Clca1/Kcnk1/Wfs1/Timd2/Camk2b/Slc5a9/Tesc	30
GO:0086005	BP	GO:0086005	ventricular cardiac muscle cell action potential	5/433	28/28943	5.41815e-05	0.00277822	0.00193152	Jup/Dsc2/Dsp/Pkp2/Dsg2	5
GO:0097186	BP	GO:0097186	amelogenesis	5/433	28/28943	5.41815e-05	0.00277822	0.00193152	Msx2/Cftr/Itgb6/Perp/Fam20c	5
GO:0035239	BP	GO:0035239	tube morphogenesis	31/433	959/28943	5.70664e-05	0.00284443	0.00197755	Msx2/Klf4/Six1/Cdh1/Plcd3/Hmga2/Zeb2/Hes1/Esrp1/Adgrg1/Jup/Grhl2/Mycn/Wnt4/Wnt7a/Dcn/Rdh10/Scg2/Anxa3/Agr2/Wnt7b/Pdgfa/Edn2/Bmp4/Fgfr2/Cxcl17/Srpx2/Ctsh/Card10/Asb4/Tacstd2	31
GO:0002685	BP	GO:0002685	regulation of leukocyte migration	13/433	234/28943	5.73835e-05	0.00284443	0.00197755	Cd47/Fut9/Smpd3/Ptpn22/Dapk2/Apod/Padi2/Pycard/Il33/Edn2/Cxcl17/Pla2g7/F2rl1	13
GO:0016055	BP	GO:0016055	Wnt signaling pathway	19/433	451/28943	5.84169e-05	0.00284443	0.00197755	Fermt1/Klf4/Cdh1/Ptpru/Hmga2/Zeb2/Grb10/Fzd10/Jup/Wnt4/Wnt7a/Ctnnd1/Shisa2/Rnf43/Wnt7b/Slc9a3r1/Fgfr2/Vgll4/Dlx5	19
GO:1903522	BP	GO:1903522	regulation of blood circulation	14/433	268/28943	5.8589e-05	0.00284443	0.00197755	Asic2/Chga/Mdm4/Jup/Dsc2/Dsp/Gch1/Pkp2/Oxtr/Edn2/Adra2c/Faah/Cxadr/Dsg2	14
GO:0043455	BP	GO:0043455	regulation of secondary metabolic process	4/433	15/28943	5.91709e-05	0.00284443	0.00197755	Zeb2/Slc7a11/a/Gipc1	4
GO:0048021	BP	GO:0048021	regulation of melanin biosynthetic process	4/433	15/28943	5.91709e-05	0.00284443	0.00197755	Zeb2/Slc7a11/a/Gipc1	4
GO:1900376	BP	GO:1900376	regulation of secondary metabolite biosynthetic process	4/433	15/28943	5.91709e-05	0.00284443	0.00197755	Zeb2/Slc7a11/a/Gipc1	4
GO:0048568	BP	GO:0048568	embryonic organ development	21/433	531/28943	5.98967e-05	0.00285384	0.0019841	Six1/Plcd3/Hes1/Pls1/Krt19/Aldh1a1/Grhl2/Mycn/Myo3b/Myb/Lrig1/Rdh10/Wnt7b/Pdgfa/Slc9a3r1/Bmp4/Fgfr2/Krt8/Llgl2/Gjb6/Dlx5	21
GO:0198738	BP	GO:0198738	cell-cell signaling by wnt	19/433	453/28943	6.19414e-05	0.00292537	0.00203383	Fermt1/Klf4/Cdh1/Ptpru/Hmga2/Zeb2/Grb10/Fzd10/Jup/Wnt4/Wnt7a/Ctnnd1/Shisa2/Rnf43/Wnt7b/Slc9a3r1/Fgfr2/Vgll4/Dlx5	19
GO:0032872	BP	GO:0032872	regulation of stress-activated MAPK cascade	12/433	204/28943	6.37262e-05	0.00292645	0.00203457	Ezr/Mid1/Unc5cl/Tnfrsf19/Ptpn22/Wnt7a/Nod1/Gadd45g/Pycard/Wnt7b/Bmp4/F2rl1	12
GO:0035296	BP	GO:0035296	regulation of tube diameter	11/433	173/28943	6.3769e-05	0.00292645	0.00203457	Asic2/Chga/Cftr/Smpd3/Gch1/Oxtr/Sod3/Edn2/Adra2c/Faah/F2rl1	11
GO:0097746	BP	GO:0097746	blood vessel diameter maintenance	11/433	173/28943	6.3769e-05	0.00292645	0.00203457	Asic2/Chga/Cftr/Smpd3/Gch1/Oxtr/Sod3/Edn2/Adra2c/Faah/F2rl1	11
GO:0043903	BP	GO:0043903	regulation of biological process involved in symbiotic interaction	7/433	67/28943	6.41383e-05	0.00292645	0.00203457	Ltf/Fuca2/Sftpd/Fbln1/Arg1/Tmprss4/F2rl1	7
GO:0009611	BP	GO:0009611	response to wounding	21/433	535/28943	6.66002e-05	0.00301324	0.00209492	Nrep/Fermt1/Pla2g4a/Msx2/Klf4/Cadm4/Slc7a11/Plet1/Tspan8/F11r/Wnt4/Wnt7a/Itgb6/Tec/Dsp/Pdgfa/Adra2c/Fbln1/Cxadr/Tmprss4/F2rl1	21
GO:0035150	BP	GO:0035150	regulation of tube size	11/433	174/28943	6.7174e-05	0.00301387	0.00209536	Asic2/Chga/Cftr/Smpd3/Gch1/Oxtr/Sod3/Edn2/Adra2c/Faah/F2rl1	11
GO:0010035	BP	GO:0010035	response to inorganic substance	21/433	537/28943	7.01961e-05	0.0030898	0.00214815	Pam/Pla2g4a/Cpne8/Cdh1/Fmr1/Gpr39/Ank3/Cp/Txnrd2/Smpd3/Slc40a1/Fos/Fibin/Trpv6/Gch1/Aoc1/Sod3/Krt8/Slc25a13/Gja3/Camk2b	21
GO:0000904	BP	GO:0000904	cell morphogenesis involved in differentiation	28/433	835/28943	7.02571e-05	0.0030898	0.00214815	Cdh1/Ntf3/Ngef/Zeb2/Hes1/Ank3/Alcam/Pls1/Phactr1/Nedd9/Micall2/Abi2/Grhl2/Lama3/Wnt7a/Myo3b/Mbp/Wnt7b/Slc9a3r1/Edn2/Lamb3/Fgfr2/Lamc2/Fbln1/Dlx5/Camk2b/Atp5g1/Tacstd2	28
GO:0035315	BP	GO:0035315	hair cell differentiation	7/433	68/28943	7.0588e-05	0.0030898	0.00214815	Hes1/Pls1/Esrp1/Mycn/Myo3b/Slc9a3r1/Bmp4	7
GO:0072659	BP	GO:0072659	protein localization to plasma membrane	15/433	308/28943	7.12667e-05	0.00309435	0.00215131	Tspan33/Cdh1/Pkp3/Ezr/Ank3/Pls1/Dpp6/F11r/Jup/Pkp2/Agr2/Slc9a3r1/Tmbim1/Camk2b/Tesc	15
GO:0070302	BP	GO:0070302	regulation of stress-activated protein kinase signaling cascade	12/433	207/28943	7.33027e-05	0.0031573	0.00219507	Ezr/Mid1/Unc5cl/Tnfrsf19/Ptpn22/Wnt7a/Nod1/Gadd45g/Pycard/Wnt7b/Bmp4/F2rl1	12
GO:0040017	BP	GO:0040017	positive regulation of locomotion	23/433	622/28943	7.48278e-05	0.0031974	0.00222296	Cd47/Fermt1/Ntf3/Nedd9/Plet1/Wnt7a/Dapk2/Epcam/Mmp7/Scg2/Anxa3/Pycard/Pdgfa/Edn2/Bmp4/Cxcl17/Lamc2/Fbln1/Pla2g7/Srpx2/Grb7/Ctsh/F2rl1	23
GO:0007015	BP	GO:0007015	actin filament organization	19/433	460/28943	7.58102e-05	0.00321388	0.00223441	Cd47/Myo1b/Ezr/Myo5c/Pls1/Phactr1/Nedd9/Micall2/Fam171a1/Abi2/F11r/Wnt4/Avil/Capg/Myo1d/Pycard/Rhpn2/Tacstd2/F2rl1	19
GO:0006857	BP	GO:0006857	oligopeptide transport	4/433	16/28943	7.79638e-05	0.003256	0.00226369	Car2/Slc7a11/Slc15a2/Slc9a3r1	4
GO:0032965	BP	GO:0032965	regulation of collagen biosynthetic process	6/433	48/28943	7.81051e-05	0.003256	0.00226369	Scx/Ltbp1/Serpinb7/Wnt4/Bmp4/Cyp2j6	6
GO:0009615	BP	GO:0009615	response to virus	16/433	347/28943	7.86182e-05	0.003256	0.00226369	Ifne/Fmr1/Spon2/Ptpn22/Casp1/Itgb6/Adar/Rtp4/Zbp1/Pycard/Il33/Htra1/Gbp2b/Ddit4/Cxadr/F2rl1	16
GO:0098771	BP	GO:0098771	inorganic ion homeostasis	23/433	625/28943	8.03888e-05	0.00330392	0.00229701	Chga/Steap1/Car2/Gpr39/Cftr/Ank3/Stc2/Cp/Car12/Slc40a1/Slc39a8/Immt/Ltf/Cyb561/Trpv6/Scgn/Slc35g1/Slc9a3r1/Slc34a2/Edn2/Atp13a4/Wfs1/Tesc	23
GO:0002062	BP	GO:0002062	chondrocyte differentiation	9/433	120/28943	8.35876e-05	0.0034018	0.00236506	Msx2/Scx/Hmga2/Smpd3/Cytl1/Wnt7a/Chrdl2/Bmp4/Por	9
GO:0042475	BP	GO:0042475	odontogenesis of dentin-containing tooth	8/433	94/28943	8.52091e-05	0.0034018	0.00236506	Msx2/Cftr/Smpd3/Itgb6/Perp/Wnt7b/Bmp4/Fam20c	8
GO:0042490	BP	GO:0042490	mechanoreceptor differentiation	8/433	94/28943	8.52091e-05	0.0034018	0.00236506	Ntf3/Hes1/Pls1/Esrp1/Mycn/Myo3b/Slc9a3r1/Bmp4	8
GO:0007162	BP	GO:0007162	negative regulation of cell adhesion	15/433	313/28943	8.52978e-05	0.0034018	0.00236506	Muc4/Klf4/Cdh1/Vtcn1/Plet1/Ptpn22/Epcam/Apod/Mbp/Il20rb/Bmp4/Sftpd/Fbln1/Arg1/Tacstd2	15
GO:0051403	BP	GO:0051403	stress-activated MAPK cascade	13/433	244/28943	8.76949e-05	0.00347169	0.00241365	Ezr/Mid1/Map2k6/Unc5cl/Tnfrsf19/Ptpn22/Wnt7a/Nod1/Gadd45g/Pycard/Wnt7b/Bmp4/F2rl1	13
GO:0032967	BP	GO:0032967	positive regulation of collagen biosynthetic process	5/433	31/28943	9.02778e-05	0.00354785	0.0024666	Scx/Ltbp1/Serpinb7/Wnt4/Bmp4	5
GO:0001890	BP	GO:0001890	placenta development	11/433	180/28943	9.10571e-05	0.00355255	0.00246986	Pla2g4a/Cdh1/Plcd3/Hes1/Krt19/Grhl2/Wnt7b/Fgfr2/Krt8/Htra1/Llgl2	11
GO:0043066	BP	GO:0043066	negative regulation of apoptotic process	31/433	985/28943	9.27653e-05	0.00359315	0.00249809	Asic2/Muc4/Msx2/Ffar4/Klf4/Scx/Six1/Ntf3/Hmga2/Fmr1/Vtcn1/Cftr/Mdm4/Slc40a1/Wnt4/Wnt7a/Adar/Epcam/Ckmt1/Scg2/Eya2/Vnn1/Clu/Foxq1/Bmp4/Fgfr2/Tmbim1/Wfs1/Ier3/Ctsh/Por	31
GO:0023061	BP	GO:0023061	signal release	22/433	590/28943	9.47667e-05	0.00364445	0.00253376	Dio2/Pla2g4a/Ffar4/Chga/Hmga2/Fmr1/Gpr39/Cftr/Map2k6/Smpd3/Cyb5r4/Inhbb/Wnt7a/Rph3al/Trpv6/Git2/Oxtr/Edn2/Gipc1/Scg5/Stxbp2/F2rl1	22
GO:0042886	BP	GO:0042886	amide transport	16/433	353/28943	9.59493e-05	0.00366377	0.00254719	Dio2/Ffar4/Chga/Hmga2/Car2/Gpr39/Cftr/Slc7a11/Smpd3/Cyb5r4/Inhbb/Slc15a2/Rph3al/Mmp7/Slc14a1/Slc9a3r1	16
GO:0048863	BP	GO:0048863	stem cell differentiation	14/433	282/28943	0.00010074	0.00381961	0.00265553	Msx2/Six1/Zeb2/Hes1/Terc/Wnt7a/Epcam/Rdh10/Kdm3a/Wnt7b/Bmp4/Fgfr2/Krt14/Tacstd2	14
GO:1905114	BP	GO:1905114	cell surface receptor signaling pathway involved in cell-cell signaling	21/433	552/28943	0.000103156	0.00388386	0.00270021	Fermt1/Atxn1/Klf4/Cdh1/Ptpru/Hmga2/Zeb2/Grb10/Fzd10/Jup/Wnt4/Wnt7a/Ctnnd1/Shisa2/Rnf43/Wnt7b/Slc9a3r1/Bmp4/Fgfr2/Vgll4/Dlx5	21
GO:0015833	BP	GO:0015833	peptide transport	15/433	320/28943	0.000108971	0.00404882	0.00281489	Dio2/Ffar4/Chga/Hmga2/Car2/Gpr39/Cftr/Slc7a11/Smpd3/Cyb5r4/Inhbb/Slc15a2/Rph3al/Mmp7/Slc9a3r1	15
GO:0051216	BP	GO:0051216	cartilage development	12/433	216/28943	0.000109837	0.00404882	0.00281489	Msx2/Scx/Hmga2/Barx2/Smpd3/Cytl1/Mycn/Wnt7a/Chrdl2/Wnt7b/Bmp4/Por	12
GO:0035442	BP	GO:0035442	dipeptide transmembrane transport	3/433	7/28943	0.000111297	0.00404882	0.00281489	Car2/Slc7a11/Slc15a2	3
GO:0042938	BP	GO:0042938	dipeptide transport	3/433	7/28943	0.000111297	0.00404882	0.00281489	Car2/Slc7a11/Slc15a2	3
GO:0060449	BP	GO:0060449	bud elongation involved in lung branching	3/433	7/28943	0.000111297	0.00404882	0.00281489	Rdh10/Bmp4/Fgfr2	3
GO:0046434	BP	GO:0046434	organophosphate catabolic process	10/433	154/28943	0.000114628	0.00414201	0.00287968	Pla2g4a/Plb1/Smpd3/Smpdl3a/Napepld/Uox/Ampd3/Gdpd1/Pla2g7/Entpd8	10
GO:0140352	BP	GO:0140352	export from cell	31/433	999/28943	0.000119389	0.00428528	0.00297929	Dio2/Pam/Pla2g4a/Ffar4/Chga/Hmga2/Fmr1/Ezr/Exoc1/Gpr39/Cftr/Map2k6/Smpd3/Slc40a1/Cyb5r4/Inhbb/Wnt7a/Rph3al/Trpv6/Pcsk6/Anxa3/Git2/Slc35g1/Ap1m2/Oxtr/Edn2/Gipc1/Llgl2/Scg5/Stxbp2/F2rl1	31
GO:0080135	BP	GO:0080135	regulation of cellular response to stress	25/433	730/28943	0.000123582	0.00440639	0.00306349	Klf4/Hmga2/Fmr1/Ezr/Mid1/Unc5cl/Slc7a11/Ncoa7/Tnfrsf19/Ptpn22/Wnt7a/Rnf183/Nod1/Gadd45g/Gch1/Eya2/Pycard/Agr2/Wnt7b/Vnn1/Clu/Bmp4/Wfs1/Ier3/F2rl1	25
GO:0031098	BP	GO:0031098	stress-activated protein kinase signaling cascade	13/433	254/28943	0.000130985	0.00463963	0.00322564	Ezr/Mid1/Map2k6/Unc5cl/Tnfrsf19/Ptpn22/Wnt7a/Nod1/Gadd45g/Pycard/Wnt7b/Bmp4/F2rl1	13
GO:0070372	BP	GO:0070372	regulation of ERK1 and ERK2 cascade	15/433	326/28943	0.000133629	0.00470236	0.00326925	Ffar4/Klf4/Iapp/Ezr/Dynlt1b/Ptpn22/Nod1/Pycard/Pdgfa/Slc9a3r1/Bmp4/Fgfr2/Cxcl17/Fbln1/F2rl1	15
GO:2000147	BP	GO:2000147	positive regulation of cell motility	22/433	605/28943	0.000135509	0.00473753	0.00329371	Cd47/Fermt1/Ntf3/Nedd9/Plet1/Wnt7a/Dapk2/Epcam/Mmp7/Anxa3/Pycard/Pdgfa/Edn2/Bmp4/Cxcl17/Lamc2/Fbln1/Pla2g7/Srpx2/Grb7/Ctsh/F2rl1	22
GO:0046189	BP	GO:0046189	phenol-containing compound biosynthetic process	6/433	53/28943	0.000137206	0.00476592	0.00331344	Zeb2/Ddc/Slc7a11/Gch1/a/Gipc1	6
GO:0043065	BP	GO:0043065	positive regulation of apoptotic process	22/433	607/28943	0.000141975	0.00488653	0.0033973	Ppp2r2b/Pla2g4a/Msx2/Bcl2l14/Hmga2/Map2k6/Casp1/Aldh1a1/Fndc1/Inhbb/Rnf183/Dapk2/Zbp1/Gadd45g/Pycard/Clu/Slc9a3r1/Slk/Bmp4/Htra1/Camk2b/Ctsh	22
GO:0010714	BP	GO:0010714	positive regulation of collagen metabolic process	5/433	34/28943	0.000142494	0.00488653	0.0033973	Scx/Ltbp1/Serpinb7/Wnt4/Bmp4	5
GO:0060284	BP	GO:0060284	regulation of cell development	22/433	608/28943	0.000145309	0.0049305	0.00342787	Atxn1/Ntf3/Hmga2/Fmr1/Zeb2/Cftr/Hes1/Dynlt1b/Nedd9/F11r/Mycn/Wnt7a/Bhlhe40/Mbp/Wnt7b/Il33/Bmp4/Fbln1/Camk2b/Aspa/Atp5g1/Tacstd2	22
GO:0042476	BP	GO:0042476	odontogenesis	9/433	129/28943	0.000145607	0.0049305	0.00342787	Msx2/Cftr/Smpd3/Itgb6/Perp/Wnt7b/Bmp4/Fgfr2/Fam20c	9
GO:0090132	BP	GO:0090132	epithelium migration	15/433	330/28943	0.000152645	0.0051365	0.00357109	Fermt1/Klf4/Zeb2/Jup/Grhl2/Wnt7a/Dcn/Anxa3/Edn2/Bmp4/Gipc1/Srpx2/Ctsh/Card10/Tacstd2	15
GO:0048754	BP	GO:0048754	branching morphogenesis of an epithelial tube	11/433	191/28943	0.000153898	0.00514651	0.00357805	Msx2/Six1/Hmga2/Esrp1/Mycn/Wnt4/Rdh10/Bmp4/Fgfr2/Ctsh/Tacstd2	11
GO:0046330	BP	GO:0046330	positive regulation of JNK cascade	8/433	103/28943	0.000161963	0.00538276	0.0037423	Unc5cl/Tnfrsf19/Wnt7a/Nod1/Gadd45g/Pycard/Wnt7b/F2rl1	8
GO:0090130	BP	GO:0090130	tissue migration	15/433	332/28943	0.000163004	0.00538413	0.00374325	Fermt1/Klf4/Zeb2/Jup/Grhl2/Wnt7a/Dcn/Anxa3/Edn2/Bmp4/Gipc1/Srpx2/Ctsh/Card10/Tacstd2	15
GO:0021846	BP	GO:0021846	cell proliferation in forebrain	5/433	35/28943	0.000164214	0.00539102	0.00374804	Hmga2/Zeb2/Wnt7a/Wnt7b/Fgfr2	5
GO:0010712	BP	GO:0010712	regulation of collagen metabolic process	6/433	55/28943	0.000168955	0.00551304	0.00383287	Scx/Ltbp1/Serpinb7/Wnt4/Bmp4/Cyp2j6	6
GO:0001818	BP	GO:0001818	negative regulation of cytokine production	14/433	297/28943	0.000173009	0.0055771	0.00387741	Ffar4/Klf4/Ezr/Ptpn22/Inhbb/Apod/Rnf128/Pycard/Il20rb/Il33/Sftpd/Fbln1/Arg1/F2rl1	14
GO:0044057	BP	GO:0044057	regulation of system process	23/433	659/28943	0.000174569	0.0055771	0.00387741	Asic2/Klf4/Chga/Fmr1/Gpr39/Mdm4/Dlgap4/Jup/Dsc2/Inhbb/Wnt7a/Dsp/Gch1/Pkp2/Slc9a3r1/Oxtr/Il33/Edn2/Adra2c/Faah/Cxadr/Dsg2/F2rl1	23
GO:0007159	BP	GO:0007159	leukocyte cell-cell adhesion	17/433	411/28943	0.000176005	0.0055771	0.00387741	Cd47/Klf4/Vtcn1/Fut9/Hes1/Igfbp2/Ptpn22/F11r/Slc39a8/Myb/Pycard/Vnn1/Il20rb/Nfkbiz/Bmp4/Sftpd/Arg1	17
GO:0060363	BP	GO:0060363	cranial suture morphogenesis	3/433	8/28943	0.000176097	0.0055771	0.00387741	Msx2/Bmp4/Fgfr2	3
GO:0060613	BP	GO:0060613	fat pad development	3/433	8/28943	0.000176097	0.0055771	0.00387741	Arrdc3/Hmga2/Dgat2	3
GO:0043068	BP	GO:0043068	positive regulation of programmed cell death	22/433	618/28943	0.000182668	0.00575138	0.00399857	Ppp2r2b/Pla2g4a/Msx2/Bcl2l14/Hmga2/Map2k6/Casp1/Aldh1a1/Fndc1/Inhbb/Rnf183/Dapk2/Zbp1/Gadd45g/Pycard/Clu/Slc9a3r1/Slk/Bmp4/Htra1/Camk2b/Ctsh	22
GO:0045604	BP	GO:0045604	regulation of epidermal cell differentiation	6/433	56/28943	0.000186865	0.00581551	0.00404316	Msx2/Hes1/Esrp1/Grhl2/Mycn/Bmp4	6
GO:0060428	BP	GO:0060428	lung epithelium development	6/433	56/28943	0.000186865	0.00581551	0.00404316	Hmga2/Grhl2/Agr2/Wnt7b/Bmp4/Fgfr2	6
GO:0060070	BP	GO:0060070	canonical Wnt signaling pathway	14/433	300/28943	0.000191889	0.00593753	0.00412799	Fermt1/Klf4/Cdh1/Ptpru/Zeb2/Fzd10/Jup/Wnt4/Wnt7a/Ctnnd1/Wnt7b/Slc9a3r1/Fgfr2/Dlx5	14
GO:0030335	BP	GO:0030335	positive regulation of cell migration	21/433	578/28943	0.000193649	0.00595775	0.00414205	Cd47/Fermt1/Ntf3/Nedd9/Plet1/Wnt7a/Dapk2/Mmp7/Anxa3/Pycard/Pdgfa/Edn2/Bmp4/Cxcl17/Lamc2/Fbln1/Pla2g7/Srpx2/Grb7/Ctsh/F2rl1	21
GO:0016042	BP	GO:0016042	lipid catabolic process	15/433	338/28943	0.000197827	0.00602084	0.00418591	Plch2/Pla2g4a/Plcd3/Plb1/Slc27a2/Smpd3/Lpin3/Plch1/Smpdl3a/Napepld/Hsd17b11/Gdpd1/Pla2g7/Faah/Pla2g2e	15
GO:0035313	BP	GO:0035313	wound healing, spreading of epidermal cells	4/433	20/28943	0.000197936	0.00602084	0.00418591	Fermt1/Msx2/Plet1/Wnt7a	4
GO:0120254	BP	GO:0120254	olefinic compound metabolic process	10/433	166/28943	0.000211853	0.00640797	0.00445506	Pla2g4a/Akr1c14/Plb1/Aldh1a1/Wnt4/Rdh10/Adh1/Cyp2j6/Alox12e/Dhrs9	10
GO:0051145	BP	GO:0051145	smooth muscle cell differentiation	7/433	81/28943	0.000214385	0.00643539	0.00447413	Six1/Ntf3/Hes1/Wnt4/Wnt7b/Bmp4/Fgfr2	7
GO:0007435	BP	GO:0007435	salivary gland morphogenesis	5/433	37/28943	0.000215151	0.00643539	0.00447413	Cdh1/Esrp1/Ctnnd1/Pdgfa/Fgfr2	5
GO:0032103	BP	GO:0032103	positive regulation of response to external stimulus	18/433	459/28943	0.000220286	0.00655258	0.0045556	Cd47/Pla2g4a/Ntf3/Casp1/Dapk2/Nod1/Zbp1/C2cd4a/Scg2/Pycard/Napepld/Nfkbiz/Il33/Edn2/Cxcl17/Pla2g7/Arg1/F2rl1	18
GO:0034478	BP	GO:0034478	phosphatidylglycerol catabolic process	2/433	2/28943	0.000223306	0.00656982	0.00456758	Pla2g4a/Plb1	2
GO:0090191	BP	GO:0090191	negative regulation of branching involved in ureteric bud morphogenesis	2/433	2/28943	0.000223306	0.00656982	0.00456758	Bmp4/Tacstd2	2
GO:0006826	BP	GO:0006826	iron ion transport	6/433	58/28943	0.000227167	0.0066363	0.00461381	Myo1b/Cp/Slc40a1/Slc39a8/Ltf/Timd2	6
GO:0042303	BP	GO:0042303	molting cycle	9/433	137/28943	0.000229263	0.0066363	0.00461381	Fermt1/Msx2/Barx2/Tnfrsf19/Lrig1/Pdgfa/Foxq1/Fgfr2/Krt14	9
GO:0042633	BP	GO:0042633	hair cycle	9/433	137/28943	0.000229263	0.0066363	0.00461381	Fermt1/Msx2/Barx2/Tnfrsf19/Lrig1/Pdgfa/Foxq1/Fgfr2/Krt14	9
GO:0032940	BP	GO:0032940	secretion by cell	29/433	944/28943	0.000233138	0.00664829	0.00462214	Dio2/Pam/Pla2g4a/Ffar4/Chga/Hmga2/Fmr1/Ezr/Exoc1/Gpr39/Cftr/Map2k6/Smpd3/Cyb5r4/Inhbb/Wnt7a/Rph3al/Trpv6/Pcsk6/Anxa3/Git2/Ap1m2/Oxtr/Edn2/Gipc1/Llgl2/Scg5/Stxbp2/F2rl1	29
GO:0030178	BP	GO:0030178	negative regulation of Wnt signaling pathway	10/433	168/28943	0.000233382	0.00664829	0.00462214	Fermt1/Cdh1/Ptpru/Hmga2/Grb10/Ctnnd1/Shisa2/Rnf43/Slc9a3r1/Vgll4	10
GO:0048015	BP	GO:0048015	phosphatidylinositol-mediated signaling	10/433	168/28943	0.000233382	0.00664829	0.00462214	Plch2/Klf4/Plcd3/Ezr/Exoc1/Plch1/Dcn/Pdgfa/Slc9a3r1/F2rl1	10
GO:0001568	BP	GO:0001568	blood vessel development	25/433	762/28943	0.000237362	0.0067182	0.00467074	Klf4/Six1/Plcd3/Hmga2/Hes1/Ltbp1/Serpinb7/Adgrg1/Jup/Wnt4/Wnt7a/Dcn/Scg2/Anxa3/Wnt7b/Pdgfa/Edn2/Bmp4/Fgfr2/Llgl2/Cxcl17/Srpx2/Ctsh/Card10/Asb4	25
GO:0060349	BP	GO:0060349	bone morphogenesis	8/433	109/28943	0.000239455	0.0067182	0.00467074	Msx2/Scx/Smpd3/Ltf/Bmp4/Fgfr2/Dlx5/Por	8
GO:0003018	BP	GO:0003018	vascular process in circulatory system	12/433	235/28943	0.000240574	0.0067182	0.00467074	Asic2/Chga/Cftr/Smpd3/C2cd4a/Gch1/Oxtr/Sod3/Edn2/Adra2c/Faah/F2rl1	12
GO:0070166	BP	GO:0070166	enamel mineralization	4/433	21/28943	0.000241632	0.0067182	0.00467074	Msx2/Cftr/Itgb6/Fam20c	4
GO:0032609	BP	GO:0032609	interferon-gamma production	9/433	138/28943	0.000242075	0.0067182	0.00467074	Cd47/Vtcn1/Ptpn22/Gadd45g/Pycard/Il20rb/Il33/Il18r1/F2rl1	9
GO:0071634	BP	GO:0071634	regulation of transforming growth factor beta production	5/433	38/28943	0.000244729	0.00672256	0.00467377	Fermt1/Ltbp1/Serpinb7/Itgb6/Fbln1	5
GO:0086004	BP	GO:0086004	regulation of cardiac muscle cell contraction	5/433	38/28943	0.000244729	0.00672256	0.00467377	Jup/Dsc2/Dsp/Pkp2/Dsg2	5
GO:0032880	BP	GO:0032880	regulation of protein localization	29/433	949/28943	0.000254334	0.00692691	0.00481585	Pam/Fermt1/Gpm6b/Chga/Six1/Cdh1/Dclk3/Ezr/Exoc1/Gpr39/Cftr/Ank3/Slc7a11/Pls1/Dpp6/Ptpn22/Jup/Fndc1/Inhbb/Rph3al/Apod/Tmem30b/Agr2/Bmp4/Tmbim1/Llgl2/Camk2b/Card10/F2rl1	29
GO:0002274	BP	GO:0002274	myeloid leukocyte activation	13/433	272/28943	0.000256028	0.00692691	0.00481585	Pla2g4a/Chga/Cftr/Casp1/Itgb6/Anxa3/Pycard/Clu/Il33/Edn2/Timd2/Stxbp2/F2rl1	13
GO:0044403	BP	GO:0044403	biological process involved in symbiotic interaction	13/433	272/28943	0.000256028	0.00692691	0.00481585	Hmga2/Fmr1/Dynlt1b/Tmprss11e/Ltf/Napepld/Gbp2b/Fuca2/Sftpd/Fbln1/Arg1/Tmprss4/F2rl1	13
GO:0032101	BP	GO:0032101	regulation of response to external stimulus	30/433	997/28943	0.000259049	0.00696223	0.0048404	Cd47/Pla2g4a/Ffar4/Klf4/Ntf3/Ptpn22/Tspan8/Casp1/Wnt4/Ltf/Dapk2/Adar/Nod1/Zbp1/C2cd4a/Scg2/Padi2/Pycard/Pdgfa/Napepld/Il20rb/Nfkbiz/Il33/Edn2/Htra1/Cxcl17/Ier3/Pla2g7/Arg1/F2rl1	30
GO:0048023	BP	GO:0048023	positive regulation of melanin biosynthetic process	3/433	9/28943	0.000261213	0.00696223	0.0048404	Zeb2/a/Gipc1	3
GO:1900378	BP	GO:1900378	positive regulation of secondary metabolite biosynthetic process	3/433	9/28943	0.000261213	0.00696223	0.0048404	Zeb2/a/Gipc1	3
GO:0090092	BP	GO:0090092	regulation of transmembrane receptor protein serine/threonine kinase signaling pathway	13/433	273/28943	0.000265259	0.00703524	0.00489116	Nrep/Fermt1/Msx2/Zeb2/Grem2/Hes1/Ltbp1/Inhbb/Chrdl2/Bmp4/Htra1/Gipc1/Pmepa1	13
GO:0048017	BP	GO:0048017	inositol lipid-mediated signaling	10/433	171/28943	0.000269095	0.00706734	0.00491348	Plch2/Klf4/Plcd3/Ezr/Exoc1/Plch1/Dcn/Pdgfa/Slc9a3r1/F2rl1	10
GO:0051017	BP	GO:0051017	actin filament bundle assembly	10/433	171/28943	0.000269095	0.00706734	0.00491348	Cd47/Myo1b/Ezr/Pls1/Phactr1/Fam171a1/F11r/Wnt4/Rhpn2/Tacstd2	10
GO:0086091	BP	GO:0086091	regulation of heart rate by cardiac conduction	5/433	39/28943	0.000277298	0.00724743	0.00503869	Jup/Dsc2/Dsp/Pkp2/Dsg2	5
GO:0060602	BP	GO:0060602	branch elongation of an epithelium	4/433	22/28943	0.000291855	0.00759104	0.00527757	Six1/Rdh10/Bmp4/Fgfr2	4
GO:1903530	BP	GO:1903530	regulation of secretion by cell	23/433	685/28943	0.000302596	0.00783258	0.0054455	Pam/Pla2g4a/Ffar4/Chga/Hmga2/Fmr1/Ezr/Exoc1/Gpr39/Cftr/Map2k6/Smpd3/Inhbb/Wnt7a/Rph3al/Git2/Oxtr/Edn2/Gipc1/Llgl2/Scg5/Stxbp2/F2rl1	23
GO:0002027	BP	GO:0002027	regulation of heart rate	8/433	113/28943	0.000306274	0.00788986	0.00548533	Mdm4/Jup/Dsc2/Dsp/Gch1/Pkp2/Edn2/Dsg2	8
GO:0061572	BP	GO:0061572	actin filament bundle organization	10/433	174/28943	0.00030927	0.0079291	0.0055126	Cd47/Myo1b/Ezr/Pls1/Phactr1/Fam171a1/F11r/Wnt4/Rhpn2/Tacstd2	10
GO:0002067	BP	GO:0002067	glandular epithelial cell differentiation	7/433	86/28943	0.000310788	0.00793026	0.00551341	Klf4/Cftr/Hes1/Wnt4/Agr2/Bmp4/Fgfr2	7
GO:0071604	BP	GO:0071604	transforming growth factor beta production	5/433	40/28943	0.000313051	0.00794549	0.005524	Fermt1/Ltbp1/Serpinb7/Itgb6/Fbln1	5
GO:0060047	BP	GO:0060047	heart contraction	12/433	242/28943	0.000314337	0.00794549	0.005524	Chga/Map2k6/Mdm4/Jup/Dsc2/Dsp/Sgcg/Gch1/Pkp2/Edn2/Cxadr/Dsg2	12
GO:0045859	BP	GO:0045859	regulation of protein kinase activity	21/433	600/28943	0.000318809	0.00802087	0.00557641	Deptor/Ntf3/Hmga2/Zeb2/Gpr39/Map2k6/Nedd9/Fzd10/Abi2/Ptpn22/Ltf/Adar/Gadd45g/Pycard/Pdgfa/Dok7/Clu/Slc9a3r1/Adra2c/Bmp4/Card10	21
GO:0051223	BP	GO:0051223	regulation of protein transport	20/433	558/28943	0.000325345	0.00814116	0.00566004	Pam/Fermt1/Chga/Cdh1/Ezr/Exoc1/Gpr39/Cftr/Ank3/Slc7a11/Ptpn22/Jup/Fndc1/Inhbb/Rph3al/Apod/Tmem30b/Bmp4/Llgl2/F2rl1	20
GO:0050873	BP	GO:0050873	brown fat cell differentiation	6/433	62/28943	0.000328126	0.00814116	0.00566004	Dio2/Ffar4/Six1/Zfp516/Napepld/Lamb3	6
GO:0060711	BP	GO:0060711	labyrinthine layer development	6/433	62/28943	0.000328126	0.00814116	0.00566004	Plcd3/Hes1/Grhl2/Wnt7b/Fgfr2/Llgl2	6
GO:0060113	BP	GO:0060113	inner ear receptor cell differentiation	7/433	87/28943	0.000333696	0.00819891	0.00570019	Hes1/Pls1/Esrp1/Mycn/Myo3b/Slc9a3r1/Bmp4	7
GO:0022408	BP	GO:0022408	negative regulation of cell-cell adhesion	11/433	209/28943	0.000335015	0.00819891	0.00570019	Muc4/Klf4/Cdh1/Vtcn1/Ptpn22/Epcam/Mbp/Il20rb/Bmp4/Sftpd/Arg1	11
GO:0051668	BP	GO:0051668	localization within membrane	23/433	690/28943	0.000335022	0.00819891	0.00570019	Tspan33/Cdh1/Pkp3/Ezr/Exoc1/Ank3/Dennd1a/Slc7a11/Pls1/Arl4c/Dpp6/Snx7/Micall2/F11r/Jup/Rtp4/Pkp2/Agr2/Dok7/Slc9a3r1/Tmbim1/Camk2b/Tesc	23
GO:0015711	BP	GO:0015711	organic anion transport	15/433	356/28943	0.000343615	0.00837114	0.00581993	Cd47/Pla2g4a/Slc16a14/Cftr/Map2k6/Slc7a11/Slc39a8/Slco4a1/Slc9a3r1/Slc6a13/Gipc1/Slc25a13/Arg1/Lrrc8d/Pla2g2e	15
GO:0007431	BP	GO:0007431	salivary gland development	5/433	41/28943	0.000352189	0.00850308	0.00591166	Cdh1/Esrp1/Ctnnd1/Pdgfa/Fgfr2	5
GO:0042572	BP	GO:0042572	retinol metabolic process	5/433	41/28943	0.000352189	0.00850308	0.00591166	Plb1/Aldh1a1/Rdh10/Adh1/Dhrs9	5
GO:0051960	BP	GO:0051960	regulation of nervous system development	20/433	562/28943	0.000356328	0.00856461	0.00595443	Asic2/Atxn1/Ntf3/Hmga2/Fmr1/Zeb2/Hes1/Dynlt1b/Mycn/Wnt7a/Bhlhe40/Mbp/Wnt7b/Oxtr/Il33/Bmp4/Srpx2/Camk2b/Aspa/Atp5g1	20
GO:0045682	BP	GO:0045682	regulation of epidermis development	6/433	63/28943	0.000358144	0.00857	0.00595818	Msx2/Hes1/Esrp1/Grhl2/Mycn/Bmp4	6
GO:0010721	BP	GO:0010721	negative regulation of cell development	11/433	211/28943	0.000363235	0.00865334	0.00601613	Hmga2/Cftr/Hes1/Dynlt1b/Mycn/Wnt7a/Mbp/Wnt7b/Bmp4/Fbln1/Tacstd2	11
GO:0002065	BP	GO:0002065	columnar/cuboidal epithelial cell differentiation	9/433	146/28943	0.000367554	0.00871768	0.00606086	Klf4/Cdh1/Cftr/Hes1/Wnt4/Agr2/Bmp4/Fgfr2/Fam20c	9
GO:0006066	BP	GO:0006066	alcohol metabolic process	15/433	359/28943	0.000375242	0.00886099	0.00616049	Pla2g4a/Mogat1/Akr1c14/Cftr/Plb1/Aldh1a1/Wnt4/Rdh10/Gch1/Napepld/Adh1/Gdpd1/Dgat2/Dhrs9/Por	15
GO:1901214	BP	GO:1901214	regulation of neuron death	16/433	399/28943	0.000381016	0.00895803	0.00622796	Ppp2r2b/Egln3/Chga/Six1/Ntf3/Fmr1/Slc7a11/Ncoa7/Casp1/Fos/Clu/Foxq1/Trim2/Wfs1/Atp5g1/Ddit4	16
GO:0040013	BP	GO:0040013	negative regulation of locomotion	15/433	360/28943	0.000386326	0.00903463	0.00628121	Arrdc3/Klf4/Cdh1/Ptpru/Adgrg1/Jup/Wnt4/Dcn/Apod/Padi2/Slc9a3r1/Il33/Fbln1/Card10/Tacstd2	15
GO:0007169	BP	GO:0007169	transmembrane receptor protein tyrosine kinase signaling pathway	21/433	609/28943	0.00038763	0.00903463	0.00628121	Atxn1/Ntf3/Cadm4/Ngef/Grb10/Nedd9/Igfbp2/Smpd3/Wnt4/Shisa2/Dcn/Nrg2/Apod/Agr2/Pdgfa/Slc9a3r1/Bmp4/Fgfr2/Fam20c/Blnk/Ddit4	21
GO:0019748	BP	GO:0019748	secondary metabolic process	6/433	64/28943	0.000390268	0.00904778	0.00629035	Pam/Zeb2/Akr1c14/Slc7a11/a/Gipc1	6
GO:0030198	BP	GO:0030198	extracellular matrix organization	14/433	322/28943	0.000393008	0.00904778	0.00629035	Egfl6/Fermt1/Gpm6b/Scx/Smpd3/Slc39a8/Crispld2/Mmp7/Serpinb5/Lamb3/Cyp2j6/Fbln1/Elf3/Col6a4	14
GO:0010464	BP	GO:0010464	regulation of mesenchymal cell proliferation	5/433	42/28943	0.000394916	0.00904778	0.00629035	Six1/Mycn/Pdgfa/Bmp4/Fgfr2	5
GO:0086002	BP	GO:0086002	cardiac muscle cell action potential involved in contraction	5/433	42/28943	0.000394916	0.00904778	0.00629035	Jup/Dsc2/Dsp/Pkp2/Dsg2	5
GO:0043062	BP	GO:0043062	extracellular structure organization	14/433	323/28943	0.000405343	0.00918764	0.00638759	Egfl6/Fermt1/Gpm6b/Scx/Smpd3/Slc39a8/Crispld2/Mmp7/Serpinb5/Lamb3/Cyp2j6/Fbln1/Elf3/Col6a4	14
GO:0001508	BP	GO:0001508	action potential	9/433	148/28943	0.00040614	0.00918764	0.00638759	Fmr1/Ank3/Dpp6/Jup/Dsc2/Dsp/Pkp2/Cxadr/Dsg2	9
GO:0050729	BP	GO:0050729	positive regulation of inflammatory response	9/433	148/28943	0.00040614	0.00918764	0.00638759	Cd47/Pla2g4a/Casp1/Zbp1/C2cd4a/Pycard/Napepld/Nfkbiz/Il33	9
GO:0001892	BP	GO:0001892	embryonic placenta development	8/433	118/28943	0.000410439	0.00924603	0.00642819	Plcd3/Hes1/Krt19/Grhl2/Wnt7b/Fgfr2/Krt8/Llgl2	8
GO:0055080	BP	GO:0055080	cation homeostasis	21/433	612/28943	0.000413291	0.00924997	0.00643093	Chga/Steap1/Car2/Gpr39/Cftr/Ank3/Stc2/Cp/Car12/Slc40a1/Slc39a8/Immt/Ltf/Cyb561/Trpv6/Scgn/Slc35g1/Edn2/Atp13a4/Wfs1/Tesc	21
GO:0042438	BP	GO:0042438	melanin biosynthetic process	4/433	24/28943	0.00041405	0.00924997	0.00643093	Zeb2/Slc7a11/a/Gipc1	4
GO:0022409	BP	GO:0022409	positive regulation of cell-cell adhesion	14/433	324/28943	0.000418008	0.00926153	0.00643896	Cd47/Cdh1/Ptpru/Vtcn1/Hes1/Ank3/Igfbp2/Ptpn22/F11r/Myo10/Myb/Pycard/Vnn1/Nfkbiz	14
GO:0045229	BP	GO:0045229	external encapsulating structure organization	14/433	324/28943	0.000418008	0.00926153	0.00643896	Egfl6/Fermt1/Gpm6b/Scx/Smpd3/Slc39a8/Crispld2/Mmp7/Serpinb5/Lamb3/Cyp2j6/Fbln1/Elf3/Col6a4	14
GO:2000146	BP	GO:2000146	negative regulation of cell motility	14/433	325/28943	0.000431008	0.00950678	0.00660947	Klf4/Cdh1/Ptpru/Adgrg1/Jup/Wnt4/Dcn/Apod/Padi2/Slc9a3r1/Il33/Fbln1/Card10/Tacstd2	14
GO:0022404	BP	GO:0022404	molting cycle process	8/433	119/28943	0.000434374	0.00950678	0.00660947	Fermt1/Msx2/Barx2/Tnfrsf19/Lrig1/Pdgfa/Foxq1/Fgfr2	8
GO:0022405	BP	GO:0022405	hair cycle process	8/433	119/28943	0.000434374	0.00950678	0.00660947	Fermt1/Msx2/Barx2/Tnfrsf19/Lrig1/Pdgfa/Foxq1/Fgfr2	8
GO:0001656	BP	GO:0001656	metanephros development	7/433	91/28943	0.000439232	0.00957418	0.00665633	Six1/Hes1/Wnt4/Rdh10/Wnt7b/Pdgfa/Bmp4	7
GO:0046328	BP	GO:0046328	regulation of JNK cascade	9/433	150/28943	0.000448	0.00972594	0.00676184	Unc5cl/Tnfrsf19/Ptpn22/Wnt7a/Nod1/Gadd45g/Pycard/Wnt7b/F2rl1	9
GO:0051607	BP	GO:0051607	defense response to virus	13/433	289/28943	0.00045652	0.00987109	0.00686275	Ifne/Spon2/Ptpn22/Casp1/Rtp4/Zbp1/Pycard/Il33/Htra1/Gbp2b/Ddit4/Cxadr/F2rl1	13
GO:0060688	BP	GO:0060688	regulation of morphogenesis of a branching structure	6/433	66/28943	0.000461242	0.0099333	0.006906	Six1/Cdh1/Pdgfa/Bmp4/Fgfr2/Tacstd2	6
GO:0043297	BP	GO:0043297	apical junction assembly	7/433	92/28943	0.000469382	0.0100103	0.00695952	Cdh1/Micall2/Cldn10/Abi2/Cldn2/F11r/Grhl2	7
GO:0140546	BP	GO:0140546	defense response to symbiont	13/433	290/28943	0.000471605	0.0100103	0.00695952	Ifne/Spon2/Ptpn22/Casp1/Rtp4/Zbp1/Pycard/Il33/Htra1/Gbp2b/Ddit4/Cxadr/F2rl1	13
GO:0010631	BP	GO:0010631	epithelial cell migration	14/433	328/28943	0.000472099	0.0100103	0.00695952	Fermt1/Klf4/Zeb2/Jup/Wnt7a/Dcn/Anxa3/Edn2/Bmp4/Gipc1/Srpx2/Ctsh/Card10/Tacstd2	14
GO:0048514	BP	GO:0048514	blood vessel morphogenesis	22/433	663/28943	0.000476572	0.0100103	0.00695952	Klf4/Six1/Plcd3/Hmga2/Hes1/Adgrg1/Jup/Wnt4/Wnt7a/Dcn/Scg2/Anxa3/Wnt7b/Pdgfa/Edn2/Bmp4/Fgfr2/Cxcl17/Srpx2/Ctsh/Card10/Asb4	22
GO:0001944	BP	GO:0001944	vasculature development	25/433	799/28943	0.000477226	0.0100103	0.00695952	Klf4/Six1/Plcd3/Hmga2/Hes1/Ltbp1/Serpinb7/Adgrg1/Jup/Wnt4/Wnt7a/Dcn/Scg2/Anxa3/Wnt7b/Pdgfa/Edn2/Bmp4/Fgfr2/Llgl2/Cxcl17/Srpx2/Ctsh/Card10/Asb4	25
GO:0071345	BP	GO:0071345	cellular response to cytokine stimulus	29/433	987/28943	0.000479911	0.0100103	0.00695952	Cd47/Klf4/Egln3/Ifne/Msc/Grem2/Ifi47/Smpd3/Casp1/Capg/Adar/Zbp1/Myb/Kdm3a/Padi2/Pycard/Pcolce2/Il20rb/Il33/Edn2/Krt8/Trim2/Gipc1/Gbp2b/Cxcl17/Arg1/Il18r1/Stxbp2/F2rl1	29
GO:0003015	BP	GO:0003015	heart process	12/433	254/28943	0.000485374	0.0100103	0.00695952	Chga/Map2k6/Mdm4/Jup/Dsc2/Dsp/Sgcg/Gch1/Pkp2/Edn2/Cxadr/Dsg2	12
GO:0032956	BP	GO:0032956	regulation of actin cytoskeleton organization	15/433	368/28943	0.000485561	0.0100103	0.00695952	Cd47/Pam/Gpm6b/Ntf3/Fzd10/Abi2/F11r/Wnt4/Avil/Capg/Myo3b/Pycard/Rhpn2/Tacstd2/F2rl1	15
GO:0044106	BP	GO:0044106	cellular amine metabolic process	8/433	121/28943	0.000485646	0.0100103	0.00695952	Rnf180/Ddc/Slc7a11/Sat1/Gch1/Aoc1/Napepld/Gdpd1	8
GO:0044089	BP	GO:0044089	positive regulation of cellular component biogenesis	19/433	533/28943	0.00048664	0.0100103	0.00695952	Cd47/Asic2/Fermt1/Chga/Fmr1/Snx7/Smpd3/Abi2/Wnt4/Wnt7a/Avil/Myo3b/Plek2/Pycard/Clu/Oxtr/Eps8l2/Srpx2/F2rl1	19
GO:0044331	BP	GO:0044331	cell-cell adhesion mediated by cadherin	4/433	25/28943	0.000487127	0.0100103	0.00695952	Cdh1/Ptpru/Ctnnd1/Epcam	4
GO:0098743	BP	GO:0098743	cell aggregation	4/433	25/28943	0.000487127	0.0100103	0.00695952	Barx2/Mycn/Wnt7a/Ltf	4
GO:0034145	BP	GO:0034145	positive regulation of toll-like receptor 4 signaling pathway	3/433	11/28943	0.000501779	0.0102332	0.00711453	Ptpn22/Ltf/F2rl1	3
GO:0035672	BP	GO:0035672	oligopeptide transmembrane transport	3/433	11/28943	0.000501779	0.0102332	0.00711453	Car2/Slc7a11/Slc15a2	3
GO:1903037	BP	GO:1903037	regulation of leukocyte cell-cell adhesion	15/433	371/28943	0.000528021	0.0107278	0.00745837	Cd47/Klf4/Vtcn1/Fut9/Hes1/Igfbp2/Ptpn22/Myb/Pycard/Vnn1/Il20rb/Nfkbiz/Bmp4/Sftpd/Arg1	15
GO:0048562	BP	GO:0048562	embryonic organ morphogenesis	14/433	333/28943	0.000548004	0.0110919	0.00771152	Six1/Hes1/Pls1/Aldh1a1/Grhl2/Mycn/Myo3b/Lrig1/Rdh10/Slc9a3r1/Bmp4/Fgfr2/Gjb6/Dlx5	14
GO:0050808	BP	GO:0050808	synapse organization	18/433	496/28943	0.000552596	0.011143	0.00774702	Asic2/Six1/Cdh1/Ngef/Fmr1/Ank3/Slc7a11/Abi2/Wnt7a/Ppfibp1/Nrg2/Wnt7b/Dok7/Oxtr/Fgfr2/Srpx2/Camk2b/Chrnb1	18
GO:1901888	BP	GO:1901888	regulation of cell junction assembly	11/433	222/28943	0.000556646	0.0111828	0.00777468	Asic2/Gpm6b/Six1/F11r/Wnt4/Wnt7a/Nrg2/Apod/Oxtr/Slk/Srpx2	11
GO:0006582	BP	GO:0006582	melanin metabolic process	4/433	26/28943	0.000568938	0.0112796	0.00784201	Zeb2/Slc7a11/a/Gipc1	4
GO:0044550	BP	GO:0044550	secondary metabolite biosynthetic process	4/433	26/28943	0.000568938	0.0112796	0.00784201	Zeb2/Slc7a11/a/Gipc1	4
GO:0016331	BP	GO:0016331	morphogenesis of embryonic epithelium	10/433	188/28943	0.000569082	0.0112796	0.00784201	Six1/Zeb2/Aldh1a1/Grhl2/Wnt4/Rdh10/Wnt7b/Bmp4/Fgfr2/Llgl2	10
GO:0045685	BP	GO:0045685	regulation of glial cell differentiation	7/433	95/28943	0.000569847	0.0112796	0.00784201	Ntf3/Hmga2/Hes1/Mycn/Il33/Bmp4/Aspa	7
GO:0001523	BP	GO:0001523	retinoid metabolic process	6/433	69/28943	0.000586108	0.011559	0.00803625	Plb1/Aldh1a1/Rdh10/Adh1/Cyp2j6/Dhrs9	6
GO:1903115	BP	GO:1903115	regulation of actin filament-based movement	5/433	46/28943	0.000605966	0.011907	0.00827819	Jup/Dsc2/Dsp/Pkp2/Dsg2	5
GO:0070201	BP	GO:0070201	regulation of establishment of protein localization	20/433	587/28943	0.000614864	0.0120379	0.00836922	Pam/Fermt1/Chga/Cdh1/Ezr/Exoc1/Gpr39/Cftr/Ank3/Slc7a11/Ptpn22/Jup/Fndc1/Inhbb/Rph3al/Apod/Tmem30b/Bmp4/Llgl2/F2rl1	20
GO:1990778	BP	GO:1990778	protein localization to cell periphery	15/433	377/28943	0.000622523	0.0121437	0.00844277	Tspan33/Cdh1/Pkp3/Ezr/Ank3/Pls1/Dpp6/F11r/Jup/Pkp2/Agr2/Slc9a3r1/Tmbim1/Camk2b/Tesc	15
GO:0015800	BP	GO:0015800	acidic amino acid transport	6/433	70/28943	0.00063308	0.0121463	0.00844458	Slc7a11/Slc9a3r1/Slc6a13/Gipc1/Slc25a13/Lrrc8d	6
GO:0061337	BP	GO:0061337	cardiac conduction	6/433	70/28943	0.00063308	0.0121463	0.00844458	Jup/Dsc2/Dsp/Pkp2/Cxadr/Dsg2	6
GO:0003338	BP	GO:0003338	metanephros morphogenesis	4/433	27/28943	0.000660048	0.0121463	0.00844458	Hes1/Wnt4/Wnt7b/Bmp4	4
GO:0043129	BP	GO:0043129	surfactant homeostasis	4/433	27/28943	0.000660048	0.0121463	0.00844458	Pla2g4a/Itgb6/Sftpd/Ctsh	4
GO:0051046	BP	GO:0051046	regulation of secretion	24/433	771/28943	0.000661517	0.0121463	0.00844458	Pam/Pla2g4a/Ffar4/Chga/Hmga2/Fmr1/Ezr/Exoc1/Gpr39/Cftr/Map2k6/Smpd3/Inhbb/Wnt7a/Rph3al/Git2/Slc9a3r1/Oxtr/Edn2/Gipc1/Llgl2/Scg5/Stxbp2/F2rl1	24
GO:0045607	BP	GO:0045607	regulation of inner ear auditory receptor cell differentiation	3/433	12/28943	0.000661626	0.0121463	0.00844458	Hes1/Esrp1/Mycn	3
GO:0045631	BP	GO:0045631	regulation of mechanoreceptor differentiation	3/433	12/28943	0.000661626	0.0121463	0.00844458	Hes1/Esrp1/Mycn	3
GO:0060433	BP	GO:0060433	bronchus development	3/433	12/28943	0.000661626	0.0121463	0.00844458	Agr2/Wnt7b/Bmp4	3
GO:0060502	BP	GO:0060502	epithelial cell proliferation involved in lung morphogenesis	3/433	12/28943	0.000661626	0.0121463	0.00844458	Hmga2/Bmp4/Fgfr2	3
GO:2000980	BP	GO:2000980	regulation of inner ear receptor cell differentiation	3/433	12/28943	0.000661626	0.0121463	0.00844458	Hes1/Esrp1/Mycn	3
GO:0001951	BP	GO:0001951	intestinal D-glucose absorption	2/433	3/28943	0.000663266	0.0121463	0.00844458	Ezr/Pls1	2
GO:0006083	BP	GO:0006083	acetate metabolic process	2/433	3/28943	0.000663266	0.0121463	0.00844458	Acss1/Aspa	2
GO:0016332	BP	GO:0016332	establishment or maintenance of polarity of embryonic epithelium	2/433	3/28943	0.000663266	0.0121463	0.00844458	Wnt7b/Llgl2	2
GO:0035993	BP	GO:0035993	deltoid tuberosity development	2/433	3/28943	0.000663266	0.0121463	0.00844458	Scx/Bmp4	2
GO:0045168	BP	GO:0045168	cell-cell signaling involved in cell fate commitment	2/433	3/28943	0.000663266	0.0121463	0.00844458	Hes1/Tm2d3	2
GO:0046331	BP	GO:0046331	lateral inhibition	2/433	3/28943	0.000663266	0.0121463	0.00844458	Hes1/Tm2d3	2
GO:0106001	BP	GO:0106001	intestinal hexose absorption	2/433	3/28943	0.000663266	0.0121463	0.00844458	Ezr/Pls1	2
GO:1902896	BP	GO:1902896	terminal web assembly	2/433	3/28943	0.000663266	0.0121463	0.00844458	Ezr/Pls1	2
GO:0009308	BP	GO:0009308	amine metabolic process	8/433	127/28943	0.000669574	0.0121843	0.00847099	Rnf180/Ddc/Slc7a11/Sat1/Gch1/Aoc1/Napepld/Gdpd1	8
GO:0120163	BP	GO:0120163	negative regulation of cold-induced thermogenesis	5/433	47/28943	0.000669865	0.0121843	0.00847099	Arrdc3/Map2k6/Aldh1a1/Il18r1/Acot11	5
GO:0016101	BP	GO:0016101	diterpenoid metabolic process	6/433	71/28943	0.000682916	0.0123239	0.00856802	Plb1/Aldh1a1/Rdh10/Adh1/Cyp2j6/Dhrs9	6
GO:0055117	BP	GO:0055117	regulation of cardiac muscle contraction	6/433	71/28943	0.000682916	0.0123239	0.00856802	Chga/Jup/Dsc2/Dsp/Pkp2/Dsg2	6
GO:0050767	BP	GO:0050767	regulation of neurogenesis	17/433	463/28943	0.000686011	0.0123239	0.00856802	Atxn1/Ntf3/Hmga2/Fmr1/Zeb2/Hes1/Dynlt1b/Mycn/Wnt7a/Bhlhe40/Mbp/Wnt7b/Il33/Bmp4/Camk2b/Aspa/Atp5g1	17
GO:0120162	BP	GO:0120162	positive regulation of cold-induced thermogenesis	7/433	98/28943	0.000686694	0.0123239	0.00856802	Dio2/Ffar4/Grb10/Zfp516/Gadd45g/Kdm3a/Oxtr	7
GO:0001952	BP	GO:0001952	regulation of cell-matrix adhesion	8/433	128/28943	0.000705063	0.0125697	0.00873895	Fermt1/Muc4/Gpm6b/Plet1/Jup/Wnt4/Apod/Slk	8
GO:0030048	BP	GO:0030048	actin filament-based movement	8/433	128/28943	0.000705063	0.0125697	0.00873895	Myo1b/Myo5c/Jup/Dsc2/Dsp/Pkp2/Myo1d/Dsg2	8
GO:0044283	BP	GO:0044283	small molecule biosynthetic process	19/433	550/28943	0.000708898	0.0125964	0.00875749	Pla2g4a/Hmgcll1/Cftr/Bcat1/Slc27a2/Aldh1a1/Wnt4/Mgst3/Rdh10/Gch1/Kdm3a/Edn2/Cyp2j6/Ggt5/Dgat2/Alox12e/Acss1/Dhrs9/Por	19
GO:0006954	BP	GO:0006954	inflammatory response	24/433	776/28943	0.000723298	0.01281	0.00890598	Cd47/Pla2g4a/Ffar4/Casp1/Itgb6/Apod/Zbp1/C2cd4a/Pycard/Napepld/Vnn1/Clu/Il20rb/Nfkbiz/Il33/Il17re/Ggt5/Cxcl17/Ier3/Pla2g7/Elf3/Il18r1/Pla2g2e/F2rl1	24
GO:0051338	BP	GO:0051338	regulation of transferase activity	25/433	825/28943	0.00075414	0.0133031	0.00924883	Arrdc3/Deptor/Klf4/Ntf3/Hmga2/Zeb2/Gpr39/Map2k6/Nedd9/Fzd10/Abi2/Ptpn22/Grhl2/Ltf/Adar/Gadd45g/Pycard/Pdgfa/Dok7/Clu/Slc9a3r1/Adra2c/Bmp4/Fgfr2/Card10	25
GO:0042573	BP	GO:0042573	retinoic acid metabolic process	4/433	28/28943	0.000761025	0.0133031	0.00924883	Aldh1a1/Rdh10/Adh1/Dhrs9	4
GO:0060445	BP	GO:0060445	branching involved in salivary gland morphogenesis	4/433	28/28943	0.000761025	0.0133031	0.00924883	Cdh1/Esrp1/Pdgfa/Fgfr2	4
GO:0060713	BP	GO:0060713	labyrinthine layer morphogenesis	4/433	28/28943	0.000761025	0.0133031	0.00924883	Grhl2/Wnt7b/Fgfr2/Llgl2	4
GO:1905330	BP	GO:1905330	regulation of morphogenesis of an epithelium	6/433	73/28943	0.000791657	0.0137844	0.00958342	Six1/Cdh1/Wnt4/Pdgfa/Bmp4/Tacstd2	6
GO:0007423	BP	GO:0007423	sensory organ development	21/433	644/28943	0.000793677	0.0137844	0.00958342	Klf4/Six1/Cdh1/Zeb2/Hes1/Pls1/Abi2/Esrp1/Cytl1/Aldh1a1/Grhl2/Mycn/Inhbb/Myo3b/Lrig1/Rdh10/Slc9a3r1/Bmp4/Fgfr2/Gjb6/Dlx5	21
GO:0050679	BP	GO:0050679	positive regulation of epithelial cell proliferation	11/433	232/28943	0.000800723	0.013862	0.0096374	Hmga2/Esrp1/Mycn/Wnt7a/Scg2/Bmp4/Fgfr2/Htra1/Dlx5/Arg1/Cxadr	11
GO:0035637	BP	GO:0035637	multicellular organismal signaling	9/433	163/28943	0.000815134	0.0140663	0.00977941	Fmr1/Ank3/Dpp6/Jup/Dsc2/Dsp/Pkp2/Cxadr/Dsg2	9
GO:0019370	BP	GO:0019370	leukotriene biosynthetic process	3/433	13/28943	0.000850592	0.014542	0.0101101	Pla2g4a/Mgst3/Ggt5	3
GO:0046462	BP	GO:0046462	monoacylglycerol metabolic process	3/433	13/28943	0.000850592	0.014542	0.0101101	Pla2g4a/Dgat2/Faah	3
GO:0045109	BP	GO:0045109	intermediate filament organization	6/433	74/28943	0.000850802	0.014542	0.0101101	Krt19/Dsp/Pkp2/Krt8/Krt5/Krt14	6
GO:0048875	BP	GO:0048875	chemical homeostasis within a tissue	4/433	29/28943	0.000872442	0.0148647	0.0103345	Pla2g4a/Itgb6/Sftpd/Ctsh	4
GO:0008016	BP	GO:0008016	regulation of heart contraction	10/433	199/28943	0.00088182	0.014977	0.0104126	Chga/Mdm4/Jup/Dsc2/Dsp/Gch1/Pkp2/Edn2/Cxadr/Dsg2	10
GO:2000027	BP	GO:2000027	regulation of animal organ morphogenesis	8/433	133/28943	0.000905934	0.0153382	0.0106637	Six1/Cdh1/Wnt4/Wnt7a/Wnt7b/Pdgfa/Bmp4/Tacstd2	8
GO:0030336	BP	GO:0030336	negative regulation of cell migration	13/433	312/28943	0.000927767	0.0156586	0.0108865	Klf4/Cdh1/Ptpru/Adgrg1/Jup/Wnt4/Dcn/Apod/Padi2/Slc9a3r1/Il33/Card10/Tacstd2	13
GO:0006937	BP	GO:0006937	regulation of muscle contraction	9/433	167/28943	0.000967766	0.0162827	0.0113203	Chga/Jup/Dsc2/Dsp/Pkp2/Oxtr/Edn2/Adra2c/Dsg2	9
GO:0090288	BP	GO:0090288	negative regulation of cellular response to growth factor stimulus	7/433	104/28943	0.000976967	0.0163863	0.0113923	Cadm4/Grem2/Wnt4/Shisa2/Chrdl2/Dcn/Htra1	7
GO:0120035	BP	GO:0120035	regulation of plasma membrane bounded cell projection organization	23/433	747/28943	0.000983761	0.016449	0.0114359	Klf4/Ngef/Fmr1/Fut9/Ezr/Zeb2/Hes1/Dynlt1b/Pls1/Abi2/Wnt7a/Myo10/Avil/Myo3b/Mbp/Plek2/Bmp4/Sh3yl1/Eps8l2/Camk2b/Atp5g1/Tacstd2/F2rl1	23
GO:0046339	BP	GO:0046339	diacylglycerol metabolic process	4/433	30/28943	0.000994872	0.0164812	0.0114583	Mogat1/Plb1/Avil/Dgat2	4
GO:0060907	BP	GO:0060907	positive regulation of macrophage cytokine production	4/433	30/28943	0.000994872	0.0164812	0.0114583	Spon2/Casp1/Nod1/Pycard	4
GO:0071548	BP	GO:0071548	response to dexamethasone	4/433	30/28943	0.000994872	0.0164812	0.0114583	Fibin/Bmp4/Ddit4/Por	4
GO:0014013	BP	GO:0014013	regulation of gliogenesis	8/433	135/28943	0.000998106	0.0164841	0.0114603	Atxn1/Ntf3/Hmga2/Hes1/Mycn/Il33/Bmp4/Aspa	8
GO:0042327	BP	GO:0042327	positive regulation of phosphorylation	25/433	843/28943	0.00101984	0.0167915	0.0116741	Chga/Ifne/Ntf3/Hmga2/Fmr1/Iapp/Zeb2/Gpr39/Map2k6/Hes1/Grb10/Nedd9/Fzd10/Abi2/Fndc1/Inhbb/Ltf/Ctnnd1/Pdgfa/Dok7/Clu/Adra2c/Bmp4/Fgfr2/Card10	25
GO:0006575	BP	GO:0006575	cellular modified amino acid metabolic process	10/433	203/28943	0.00102574	0.0168371	0.0117058	Dio2/Chac2/Slc7a11/Ckmt1/Slco4a1/Gch1/Vnn1/Dio1/Ggt5/Gdap1l1	10
GO:0051336	BP	GO:0051336	regulation of hydrolase activity	28/433	988/28943	0.00103299	0.0169046	0.0117527	Ppp2r2b/Klf4/Cdh1/Ntf3/Ngef/Dynlt1b/Dennd1a/Nedd9/Fzd10/Serpinb7/F11r/Casp1/Wnt4/Ltf/Spink12/Nod1/Mbp/Perp/Pycard/Rapgefl1/Serpinb5/Fgfr2/Serpinb11/Arhgap27/Camk2b/Ctsh/Por/F2rl1	28
GO:0002138	BP	GO:0002138	retinoic acid biosynthetic process	3/433	14/28943	0.0010706	0.0172578	0.0119982	Aldh1a1/Rdh10/Dhrs9	3
GO:0006651	BP	GO:0006651	diacylglycerol biosynthetic process	3/433	14/28943	0.0010706	0.0172578	0.0119982	Mogat1/Avil/Dgat2	3
GO:0010940	BP	GO:0010940	positive regulation of necrotic cell death	3/433	14/28943	0.0010706	0.0172578	0.0119982	Zbp1/Slc6a13/Hebp2	3
GO:0016102	BP	GO:0016102	diterpenoid biosynthetic process	3/433	14/28943	0.0010706	0.0172578	0.0119982	Aldh1a1/Rdh10/Dhrs9	3
GO:0060670	BP	GO:0060670	branching involved in labyrinthine layer morphogenesis	3/433	14/28943	0.0010706	0.0172578	0.0119982	Grhl2/Fgfr2/Llgl2	3
GO:0043549	BP	GO:0043549	regulation of kinase activity	22/433	706/28943	0.00108081	0.0173705	0.0120766	Deptor/Ntf3/Hmga2/Zeb2/Gpr39/Map2k6/Nedd9/Fzd10/Abi2/Ptpn22/Ltf/Adar/Gadd45g/Pycard/Pdgfa/Dok7/Clu/Slc9a3r1/Adra2c/Bmp4/Fgfr2/Card10	22
GO:0048736	BP	GO:0048736	appendage development	10/433	205/28943	0.00110459	0.0176472	0.012269	Msx2/Scx/Slc7a11/Grhl2/Mycn/Wnt7a/Rdh10/Bmp4/Fgfr2/Dlx5	10
GO:0060173	BP	GO:0060173	limb development	10/433	205/28943	0.00110459	0.0176472	0.012269	Msx2/Scx/Slc7a11/Grhl2/Mycn/Wnt7a/Rdh10/Bmp4/Fgfr2/Dlx5	10
GO:0006721	BP	GO:0006721	terpenoid metabolic process	6/433	78/28943	0.00112213	0.0178216	0.0123903	Plb1/Aldh1a1/Rdh10/Adh1/Cyp2j6/Dhrs9	6
GO:0042306	BP	GO:0042306	regulation of protein import into nucleus	6/433	78/28943	0.00112213	0.0178216	0.0123903	Fermt1/Cdh1/Ptpn22/Jup/Apod/Bmp4	6
GO:0051347	BP	GO:0051347	positive regulation of transferase activity	18/433	528/28943	0.00112587	0.0178285	0.012395	Arrdc3/Klf4/Ntf3/Hmga2/Zeb2/Gpr39/Map2k6/Nedd9/Fzd10/Abi2/Grhl2/Ltf/Pdgfa/Dok7/Clu/Adra2c/Fgfr2/Card10	18
GO:0050678	BP	GO:0050678	regulation of epithelial cell proliferation	16/433	442/28943	0.00113141	0.017854	0.0124128	Six1/Cdh1/Hmga2/Hes1/Esrp1/Mycn/Wnt7a/Scg2/Serpinb5/Bmp4/Fgfr2/Htra1/Dlx5/Arg1/Cxadr/Tacstd2	16
GO:0030111	BP	GO:0030111	regulation of Wnt signaling pathway	13/433	319/28943	0.00113411	0.017854	0.0124128	Fermt1/Cdh1/Ptpru/Hmga2/Zeb2/Grb10/Ctnnd1/Shisa2/Rnf43/Slc9a3r1/Fgfr2/Vgll4/Dlx5	13
GO:0048667	BP	GO:0048667	cell morphogenesis involved in neuron differentiation	21/433	663/28943	0.00113985	0.017892	0.0124392	Ntf3/Ngef/Zeb2/Hes1/Ank3/Alcam/Pls1/Phactr1/Abi2/Lama3/Wnt7a/Myo3b/Mbp/Wnt7b/Slc9a3r1/Edn2/Fgfr2/Lamc2/Dlx5/Camk2b/Atp5g1	21
GO:0120032	BP	GO:0120032	regulation of plasma membrane bounded cell projection assembly	10/433	206/28943	0.00114584	0.0179337	0.0124682	Fmr1/Abi2/Myo10/Avil/Myo3b/Plek2/Sh3yl1/Eps8l2/Tacstd2/F2rl1	10
GO:0001657	BP	GO:0001657	ureteric bud development	7/433	107/28943	0.00115436	0.0180147	0.0125245	Six1/Hes1/Wnt4/Epcam/Bmp4/Fgfr2/Tacstd2	7
GO:0046460	BP	GO:0046460	neutral lipid biosynthetic process	5/433	53/28943	0.00116467	0.0180708	0.0125635	Pla2g4a/Mogat1/Lpin3/Avil/Dgat2	5
GO:0046463	BP	GO:0046463	acylglycerol biosynthetic process	5/433	53/28943	0.00116467	0.0180708	0.0125635	Pla2g4a/Mogat1/Lpin3/Avil/Dgat2	5
GO:0055065	BP	GO:0055065	metal ion homeostasis	18/433	531/28943	0.00119922	0.0185535	0.0128991	Chga/Steap1/Gpr39/Ank3/Stc2/Cp/Slc40a1/Slc39a8/Immt/Ltf/Cyb561/Trpv6/Scgn/Slc35g1/Edn2/Atp13a4/Wfs1/Tesc	18
GO:0034754	BP	GO:0034754	cellular hormone metabolic process	8/433	139/28943	0.00120493	0.0185883	0.0129233	Akr1c14/Plb1/Aldh1a1/Wnt4/Rdh10/Adh1/Hsd17b11/Dhrs9	8
GO:0006576	BP	GO:0006576	cellular biogenic amine metabolic process	7/433	108/28943	0.00121879	0.0187485	0.0130346	Rnf180/Ddc/Sat1/Gch1/Aoc1/Napepld/Gdpd1	7
GO:0045860	BP	GO:0045860	positive regulation of protein kinase activity	14/433	363/28943	0.00125601	0.019258	0.0133889	Ntf3/Hmga2/Zeb2/Gpr39/Map2k6/Nedd9/Fzd10/Abi2/Ltf/Pdgfa/Dok7/Clu/Adra2c/Card10	14
GO:0035272	BP	GO:0035272	exocrine system development	5/433	54/28943	0.00126795	0.019258	0.0133889	Cdh1/Esrp1/Ctnnd1/Pdgfa/Fgfr2	5
GO:0001934	BP	GO:0001934	positive regulation of protein phosphorylation	23/433	762/28943	0.00127563	0.019258	0.0133889	Chga/Ifne/Ntf3/Hmga2/Fmr1/Iapp/Zeb2/Gpr39/Map2k6/Hes1/Nedd9/Fzd10/Abi2/Fndc1/Inhbb/Ltf/Ctnnd1/Pdgfa/Dok7/Clu/Adra2c/Bmp4/Card10	23
GO:0060491	BP	GO:0060491	regulation of cell projection assembly	10/433	209/28943	0.00127719	0.019258	0.0133889	Fmr1/Abi2/Myo10/Avil/Myo3b/Plek2/Sh3yl1/Eps8l2/Tacstd2/F2rl1	10
GO:0042310	BP	GO:0042310	vasoconstriction	7/433	109/28943	0.001286	0.019258	0.0133889	Asic2/Chga/Smpd3/Oxtr/Edn2/Adra2c/Faah	7
GO:0031344	BP	GO:0031344	regulation of cell projection organization	23/433	763/28943	0.00129749	0.019258	0.0133889	Klf4/Ngef/Fmr1/Fut9/Ezr/Zeb2/Hes1/Dynlt1b/Pls1/Abi2/Wnt7a/Myo10/Avil/Myo3b/Mbp/Plek2/Bmp4/Sh3yl1/Eps8l2/Camk2b/Atp5g1/Tacstd2/F2rl1	23
GO:0048608	BP	GO:0048608	reproductive structure development	13/433	324/28943	0.00130387	0.019258	0.0133889	Pla2g4a/Cdh1/Hmga2/Cftr/Adgrg1/Wnt4/Wnt7a/Rdh10/Serpinb5/Edn2/Bmp4/Fgfr2/Tesc	13
GO:0035990	BP	GO:0035990	tendon cell differentiation	2/433	4/28943	0.00131338	0.019258	0.0133889	Scx/Bmp4	2
GO:0035992	BP	GO:0035992	tendon formation	2/433	4/28943	0.00131338	0.019258	0.0133889	Scx/Bmp4	2
GO:0042126	BP	GO:0042126	nitrate metabolic process	2/433	4/28943	0.00131338	0.019258	0.0133889	Thap4/Por	2
GO:0051939	BP	GO:0051939	gamma-aminobutyric acid import	2/433	4/28943	0.00131338	0.019258	0.0133889	Slc9a3r1/Slc6a13	2
GO:0070960	BP	GO:0070960	positive regulation of neutrophil mediated cytotoxicity	2/433	4/28943	0.00131338	0.019258	0.0133889	Arg1/F2rl1	2
GO:0070961	BP	GO:0070961	positive regulation of neutrophil mediated killing of symbiont cell	2/433	4/28943	0.00131338	0.019258	0.0133889	Arg1/F2rl1	2
GO:0072095	BP	GO:0072095	regulation of branch elongation involved in ureteric bud branching	2/433	4/28943	0.00131338	0.019258	0.0133889	Six1/Bmp4	2
GO:0072198	BP	GO:0072198	mesenchymal cell proliferation involved in ureter development	2/433	4/28943	0.00131338	0.019258	0.0133889	Six1/Bmp4	2
GO:0072199	BP	GO:0072199	regulation of mesenchymal cell proliferation involved in ureter development	2/433	4/28943	0.00131338	0.019258	0.0133889	Six1/Bmp4	2
GO:1903532	BP	GO:1903532	positive regulation of secretion by cell	14/433	365/28943	0.00132252	0.019258	0.0133889	Pla2g4a/Ffar4/Ezr/Exoc1/Gpr39/Cftr/Map2k6/Smpd3/Inhbb/Rph3al/Oxtr/Edn2/Stxbp2/F2rl1	14
GO:0034638	BP	GO:0034638	phosphatidylcholine catabolic process	3/433	15/28943	0.00132345	0.019258	0.0133889	Pla2g4a/Plb1/Pla2g7	3
GO:0043584	BP	GO:0043584	nose development	3/433	15/28943	0.00132345	0.019258	0.0133889	Six1/Rdh10/Dlx5	3
GO:0072074	BP	GO:0072074	kidney mesenchyme development	3/433	15/28943	0.00132345	0.019258	0.0133889	Six1/Wnt4/Bmp4	3
GO:0072163	BP	GO:0072163	mesonephric epithelium development	7/433	110/28943	0.00135607	0.019574	0.0136086	Six1/Hes1/Wnt4/Epcam/Bmp4/Fgfr2/Tacstd2	7
GO:0072164	BP	GO:0072164	mesonephric tubule development	7/433	110/28943	0.00135607	0.019574	0.0136086	Six1/Hes1/Wnt4/Epcam/Bmp4/Fgfr2/Tacstd2	7
GO:2000243	BP	GO:2000243	positive regulation of reproductive process	7/433	110/28943	0.00135607	0.019574	0.0136086	Msx2/Cftr/Plb1/Wnt4/Inhbb/Oxtr/Camk2b	7
GO:0070997	BP	GO:0070997	neuron death	16/433	450/28943	0.00136047	0.0195849	0.0136161	Ppp2r2b/Egln3/Chga/Six1/Ntf3/Fmr1/Slc7a11/Ncoa7/Casp1/Fos/Clu/Foxq1/Trim2/Wfs1/Atp5g1/Ddit4	16
GO:0051648	BP	GO:0051648	vesicle localization	10/433	211/28943	0.00137138	0.0196235	0.013643	Myo1b/Dync1i1/Exoc1/Sec16b/Myo5c/Smpd3/a/Myo1d/Fgfr2/Mlph	10
GO:0048701	BP	GO:0048701	embryonic cranial skeleton morphogenesis	5/433	55/28943	0.00137786	0.0196235	0.013643	Six1/Grhl2/Rdh10/Bmp4/Fgfr2	5
GO:0055081	BP	GO:0055081	anion homeostasis	5/433	55/28943	0.00137786	0.0196235	0.013643	Slc7a11/Car12/Cyb561/Slc9a3r1/Slc34a2	5
GO:0002702	BP	GO:0002702	positive regulation of production of molecular mediator of immune response	8/433	142/28943	0.00138137	0.0196235	0.013643	Spon2/Ptpn22/Casp1/Nod1/Pycard/Il33/Il18r1/F2rl1	8
GO:0006690	BP	GO:0006690	icosanoid metabolic process	8/433	142/28943	0.00138137	0.0196235	0.013643	Pla2g4a/Akr1c14/Mgst3/Ces2b/Edn2/Cyp2j6/Ggt5/Alox12e	8
GO:0030509	BP	GO:0030509	BMP signaling pathway	9/433	176/28943	0.00139668	0.0197887	0.0137579	Msx2/Scx/Grem2/Hes1/Smpd3/Chrdl2/Bmp4/Htra1/Dlx5	9
GO:0034505	BP	GO:0034505	tooth mineralization	4/433	33/28943	0.00143396	0.0202105	0.0140511	Msx2/Cftr/Itgb6/Fam20c	4
GO:0060669	BP	GO:0060669	embryonic placenta morphogenesis	4/433	33/28943	0.00143396	0.0202105	0.0140511	Grhl2/Wnt7b/Fgfr2/Llgl2	4
GO:0007254	BP	GO:0007254	JNK cascade	9/433	177/28943	0.00145252	0.0202545	0.0140817	Unc5cl/Tnfrsf19/Ptpn22/Wnt7a/Nod1/Gadd45g/Pycard/Wnt7b/F2rl1	9
GO:0007596	BP	GO:0007596	blood coagulation	9/433	177/28943	0.00145252	0.0202545	0.0140817	Pla2g4a/Slc7a11/Tspan8/F11r/Tec/Pdgfa/Adra2c/Fbln1/F2rl1	9
GO:0061458	BP	GO:0061458	reproductive system development	13/433	328/28943	0.00145444	0.0202545	0.0140817	Pla2g4a/Cdh1/Hmga2/Cftr/Adgrg1/Wnt4/Wnt7a/Rdh10/Serpinb5/Edn2/Bmp4/Fgfr2/Tesc	13
GO:0070830	BP	GO:0070830	bicellular tight junction assembly	6/433	82/28943	0.00145528	0.0202545	0.0140817	Cdh1/Micall2/Cldn10/Cldn2/F11r/Grhl2	6
GO:0006631	BP	GO:0006631	fatty acid metabolic process	16/433	453/28943	0.00145589	0.0202545	0.0140817	Pam/Pla2g4a/Cryl1/Akr1c14/Slc27a2/Lpin3/Ces2b/Edn2/Cyp2j6/Ggt5/Dgat2/Alox12e/Acss1/Faah/Por/Acot11	16
GO:0010463	BP	GO:0010463	mesenchymal cell proliferation	5/433	56/28943	0.00149462	0.0206864	0.014382	Six1/Mycn/Pdgfa/Bmp4/Fgfr2	5
GO:0070169	BP	GO:0070169	positive regulation of biomineral tissue development	5/433	56/28943	0.00149462	0.0206864	0.014382	Gpm6b/Cftr/Wnt4/Bmp4/Fam20c	5
GO:0042471	BP	GO:0042471	ear morphogenesis	8/433	144/28943	0.00150998	0.0208455	0.0144926	Six1/Pls1/Myo3b/Lrig1/Slc9a3r1/Fgfr2/Gjb6/Dlx5	8
GO:1904888	BP	GO:1904888	cranial skeletal system development	6/433	83/28943	0.00154923	0.0213327	0.0148313	Msx2/Six1/Grhl2/Rdh10/Bmp4/Fgfr2	6
GO:0051345	BP	GO:0051345	positive regulation of hydrolase activity	18/433	544/28943	0.00156593	0.0215029	0.0149496	Ntf3/Ngef/Dennd1a/Nedd9/Fzd10/F11r/Casp1/Wnt4/Nod1/Mbp/Perp/Pycard/Rapgefl1/Fgfr2/Arhgap27/Camk2b/Ctsh/F2rl1	18
GO:0031214	BP	GO:0031214	biomineral tissue development	9/433	179/28943	0.00156958	0.0215029	0.0149496	Msx2/Gpm6b/Cftr/Smpd3/Wnt4/Itgb6/Bmp4/Fgfr2/Fam20c	9
GO:0001823	BP	GO:0001823	mesonephros development	7/433	113/28943	0.00158432	0.0216283	0.0150368	Six1/Hes1/Wnt4/Epcam/Bmp4/Fgfr2/Tacstd2	7
GO:0051493	BP	GO:0051493	regulation of cytoskeleton organization	18/433	545/28943	0.00159769	0.0216283	0.0150368	Cd47/Pam/Gpm6b/Ntf3/Mid1/Dynlt1b/Fzd10/Abi2/F11r/Wnt4/Avil/Capg/Myo3b/Pycard/Rhpn2/Rassf7/Tacstd2/F2rl1	18
GO:0002053	BP	GO:0002053	positive regulation of mesenchymal cell proliferation	4/433	34/28943	0.00160615	0.0216283	0.0150368	Six1/Mycn/Pdgfa/Fgfr2	4
GO:0044319	BP	GO:0044319	wound healing, spreading of cells	4/433	34/28943	0.00160615	0.0216283	0.0150368	Fermt1/Msx2/Plet1/Wnt7a	4
GO:0090505	BP	GO:0090505	epiboly involved in wound healing	4/433	34/28943	0.00160615	0.0216283	0.0150368	Fermt1/Msx2/Plet1/Wnt7a	4
GO:0042428	BP	GO:0042428	serotonin metabolic process	3/433	16/28943	0.00161087	0.0216283	0.0150368	Rnf180/Ddc/Gch1	3
GO:0045605	BP	GO:0045605	negative regulation of epidermal cell differentiation	3/433	16/28943	0.00161087	0.0216283	0.0150368	Msx2/Hes1/Grhl2	3
GO:0045683	BP	GO:0045683	negative regulation of epidermis development	3/433	16/28943	0.00161087	0.0216283	0.0150368	Msx2/Hes1/Grhl2	3
GO:0110151	BP	GO:0110151	positive regulation of biomineralization	5/433	57/28943	0.0016185	0.0216766	0.0150704	Gpm6b/Cftr/Wnt4/Bmp4/Fam20c	5
GO:0042110	BP	GO:0042110	T cell activation	19/433	591/28943	0.00163046	0.0216808	0.0150733	Cd47/Ifne/Vtcn1/Hes1/Igfbp2/Ptpn22/Wnt4/Myb/Gadd45g/Pycard/Vnn1/Il20rb/Nfkbiz/Bmp4/Sftpd/Arg1/Cxadr/Il18r1/F2rl1	19
GO:0007599	BP	GO:0007599	hemostasis	9/433	180/28943	0.00163089	0.0216808	0.0150733	Pla2g4a/Slc7a11/Tspan8/F11r/Tec/Pdgfa/Adra2c/Fbln1/F2rl1	9
GO:0050817	BP	GO:0050817	coagulation	9/433	180/28943	0.00163089	0.0216808	0.0150733	Pla2g4a/Slc7a11/Tspan8/F11r/Tec/Pdgfa/Adra2c/Fbln1/F2rl1	9
GO:1903076	BP	GO:1903076	regulation of protein localization to plasma membrane	7/433	114/28943	0.00166669	0.0221022	0.0153662	Cdh1/Ezr/Pls1/Dpp6/Agr2/Tmbim1/Camk2b	7
GO:0098742	BP	GO:0098742	cell-cell adhesion via plasma-membrane adhesion molecules	10/433	217/28943	0.0016884	0.022335	0.0155281	Klf4/Cdh1/Cadm4/Alcam/Cldn2/Dsc2/Epcam/Mbp/Cxadr/Dsg2	10
GO:0001822	BP	GO:0001822	kidney development	13/433	334/28943	0.00170719	0.0225282	0.0156624	Six1/Hes1/Serpinb7/Wnt4/Ctnnd1/Epcam/Rdh10/Wnt7b/Pdgfa/Bmp4/Fgfr2/Wfs1/Tacstd2	13
GO:0060759	BP	GO:0060759	regulation of response to cytokine stimulus	8/433	147/28943	0.00172051	0.0225932	0.0157077	Klf4/Casp1/Adar/Zbp1/Padi2/Pycard/Arg1/F2rl1	8
GO:0072089	BP	GO:0072089	stem cell proliferation	8/433	147/28943	0.00172051	0.0225932	0.0157077	Fermt1/Hmga2/Terc/Rnf43/Epcam/Bmp4/Fgfr2/Fbln1	8
GO:0002720	BP	GO:0002720	positive regulation of cytokine production involved in immune response	6/433	85/28943	0.00175091	0.0228998	0.0159208	Spon2/Casp1/Nod1/Pycard/Il18r1/F2rl1	6
GO:0120034	BP	GO:0120034	positive regulation of plasma membrane bounded cell projection assembly	7/433	115/28943	0.00175236	0.0228998	0.0159208	Fmr1/Abi2/Avil/Myo3b/Plek2/Eps8l2/F2rl1	7
GO:0001525	BP	GO:0001525	angiogenesis	18/433	550/28943	0.00176482	0.0230067	0.0159951	Klf4/Plcd3/Hmga2/Adgrg1/Jup/Wnt7a/Dcn/Scg2/Anxa3/Wnt7b/Pdgfa/Edn2/Bmp4/Fgfr2/Cxcl17/Srpx2/Ctsh/Card10	18
GO:0019637	BP	GO:0019637	organophosphate metabolic process	27/433	976/28943	0.00178012	0.0230843	0.0160491	Plch2/Pla2g4a/Pfkfb3/Cryl1/Plb1/Me1/Smpd3/Cyb5r4/Ckmt1/Smpdl3a/Pdgfa/Napepld/Sh3yl1/Uox/Fam20c/Ampd3/Slc25a13/Ier3/Gdpd1/Dgat2/Pla2g7/Acss1/Atp5g1/Ddit4/Entpd8/Pla2g2e/Acot11	27
GO:0001958	BP	GO:0001958	endochondral ossification	4/433	35/28943	0.00179221	0.0230843	0.0160491	Scx/Smpd3/Bmp4/Dlx5	4
GO:0036075	BP	GO:0036075	replacement ossification	4/433	35/28943	0.00179221	0.0230843	0.0160491	Scx/Smpd3/Bmp4/Dlx5	4
GO:0046475	BP	GO:0046475	glycerophospholipid catabolic process	4/433	35/28943	0.00179221	0.0230843	0.0160491	Pla2g4a/Plb1/Gdpd1/Pla2g7	4
GO:0090504	BP	GO:0090504	epiboly	4/433	35/28943	0.00179221	0.0230843	0.0160491	Fermt1/Msx2/Plet1/Wnt7a	4
GO:0001942	BP	GO:0001942	hair follicle development	7/433	116/28943	0.00184141	0.023549	0.0163721	Fermt1/Msx2/Barx2/Tnfrsf19/Pdgfa/Foxq1/Fgfr2	7
GO:0030038	BP	GO:0030038	contractile actin filament bundle assembly	7/433	116/28943	0.00184141	0.023549	0.0163721	Cd47/Phactr1/Fam171a1/F11r/Wnt4/Rhpn2/Tacstd2	7
GO:0043149	BP	GO:0043149	stress fiber assembly	7/433	116/28943	0.00184141	0.023549	0.0163721	Cd47/Phactr1/Fam171a1/F11r/Wnt4/Rhpn2/Tacstd2	7
GO:0019229	BP	GO:0019229	regulation of vasoconstriction	6/433	86/28943	0.00185892	0.0236951	0.0164738	Asic2/Chga/Oxtr/Edn2/Adra2c/Faah	6
GO:0019221	BP	GO:0019221	cytokine-mediated signaling pathway	15/433	421/28943	0.00186164	0.0236951	0.0164738	Ifne/Grem2/Casp1/Adar/Zbp1/Padi2/Pycard/Il20rb/Il33/Edn2/Krt8/Cxcl17/Arg1/Il18r1/F2rl1	15
GO:0090336	BP	GO:0090336	positive regulation of brown fat cell differentiation	3/433	17/28943	0.00193447	0.0245063	0.0170377	Ffar4/Six1/Napepld	3
GO:0097094	BP	GO:0097094	craniofacial suture morphogenesis	3/433	17/28943	0.00193447	0.0245063	0.0170377	Msx2/Bmp4/Fgfr2	3
GO:0050878	BP	GO:0050878	regulation of body fluid levels	14/433	381/28943	0.00196845	0.0248635	0.0172861	Pla2g4a/Klf4/Cdh1/Cftr/Slc7a11/Tspan8/F11r/Tec/Agr2/Pdgfa/Adra2c/Wfs1/Fbln1/F2rl1	14
GO:0006942	BP	GO:0006942	regulation of striated muscle contraction	6/433	87/28943	0.0019719	0.0248635	0.0172861	Chga/Jup/Dsc2/Dsp/Pkp2/Dsg2	6
GO:0003401	BP	GO:0003401	axis elongation	4/433	36/28943	0.00199269	0.0250084	0.0173868	Six1/Rdh10/Bmp4/Fgfr2	4
GO:0090183	BP	GO:0090183	regulation of kidney development	4/433	36/28943	0.00199269	0.0250084	0.0173868	Six1/Wnt4/Bmp4/Tacstd2	4
GO:0046486	BP	GO:0046486	glycerolipid metabolic process	14/433	382/28943	0.00201625	0.0252453	0.0175515	Plch2/Pla2g4a/Mogat1/Plb1/Lpin3/Avil/Pdgfa/Napepld/Sh3yl1/Gdpd1/Dgat2/Pla2g7/Faah/Pla2g2e	14
GO:0060443	BP	GO:0060443	mammary gland morphogenesis	5/433	60/28943	0.00203544	0.0253689	0.0176374	Msx2/Wnt4/Bmp4/Fgfr2/Elf3	5
GO:1900180	BP	GO:1900180	regulation of protein localization to nucleus	8/433	151/28943	0.00203657	0.0253689	0.0176374	Fermt1/Cdh1/Dclk3/Ptpn22/Jup/Apod/Bmp4/Card10	8
GO:0032680	BP	GO:0032680	regulation of tumor necrosis factor production	9/433	186/28943	0.00204026	0.0253689	0.0176374	Cd47/Spon2/Ptpn22/Ltf/Nod1/Pycard/Clu/Il33/Cyp2j6	9
GO:0001503	BP	GO:0001503	ossification	15/433	426/28943	0.00208465	0.0255891	0.0177905	Msx2/Ffar4/Gpm6b/Scx/Map2k6/Smpd3/Wnt4/Ltf/Adar/Chrdl2/Wnt7b/Bmp4/Fgfr2/Fam20c/Dlx5	15
GO:0120192	BP	GO:0120192	tight junction assembly	6/433	88/28943	0.00209	0.0255891	0.0177905	Cdh1/Micall2/Cldn10/Cldn2/F11r/Grhl2	6
GO:0070661	BP	GO:0070661	leukocyte proliferation	14/433	384/28943	0.00211474	0.0255891	0.0177905	Ifne/Vtcn1/Hes1/Igfbp2/Ptpn22/Wnt4/Pycard/Clu/Il20rb/Il33/Bmp4/Sftpd/Arg1/F2rl1	14
GO:0071772	BP	GO:0071772	response to BMP	9/433	187/28943	0.00211581	0.0255891	0.0177905	Msx2/Scx/Grem2/Hes1/Smpd3/Chrdl2/Bmp4/Htra1/Dlx5	9
GO:0071773	BP	GO:0071773	cellular response to BMP stimulus	9/433	187/28943	0.00211581	0.0255891	0.0177905	Msx2/Scx/Grem2/Hes1/Smpd3/Chrdl2/Bmp4/Htra1/Dlx5	9
GO:0003231	BP	GO:0003231	cardiac ventricle development	8/433	152/28943	0.00212231	0.0255891	0.0177905	Hes1/Ltbp1/Mdm4/Grhl2/Dsp/Pkp2/Bmp4/Fgfr2	8
GO:0043270	BP	GO:0043270	positive regulation of ion transport	13/433	343/28943	0.00215364	0.0255891	0.0177905	Asic2/Pla2g4a/Iapp/Gpr39/Cftr/Map2k6/Ank3/Dpp6/Slc9a3r1/Oxtr/Bmp4/Wfs1/Tesc	13
GO:0007380	BP	GO:0007380	specification of segmental identity, head	2/433	5/28943	0.00216728	0.0255891	0.0177905	Six1/Bmp4	2
GO:0022009	BP	GO:0022009	central nervous system vasculogenesis	2/433	5/28943	0.00216728	0.0255891	0.0177905	Wnt7a/Wnt7b	2
GO:0035287	BP	GO:0035287	head segmentation	2/433	5/28943	0.00216728	0.0255891	0.0177905	Six1/Bmp4	2
GO:0035289	BP	GO:0035289	posterior head segmentation	2/433	5/28943	0.00216728	0.0255891	0.0177905	Six1/Bmp4	2
GO:0043152	BP	GO:0043152	induction of bacterial agglutination	2/433	5/28943	0.00216728	0.0255891	0.0177905	Spon2/Sftpd	2
GO:0060681	BP	GO:0060681	branch elongation involved in ureteric bud branching	2/433	5/28943	0.00216728	0.0255891	0.0177905	Six1/Bmp4	2
GO:0061757	BP	GO:0061757	leukocyte adhesion to arterial endothelial cell	2/433	5/28943	0.00216728	0.0255891	0.0177905	Klf4/Slc39a8	2
GO:0070949	BP	GO:0070949	regulation of neutrophil mediated killing of symbiont cell	2/433	5/28943	0.00216728	0.0255891	0.0177905	Arg1/F2rl1	2
GO:0071680	BP	GO:0071680	response to indole-3-methanol	2/433	5/28943	0.00216728	0.0255891	0.0177905	Cdh1/Jup	2
GO:0071681	BP	GO:0071681	cellular response to indole-3-methanol	2/433	5/28943	0.00216728	0.0255891	0.0177905	Cdh1/Jup	2
GO:0072191	BP	GO:0072191	ureter smooth muscle development	2/433	5/28943	0.00216728	0.0255891	0.0177905	Six1/Bmp4	2
GO:0072193	BP	GO:0072193	ureter smooth muscle cell differentiation	2/433	5/28943	0.00216728	0.0255891	0.0177905	Six1/Bmp4	2
GO:0097187	BP	GO:0097187	dentinogenesis	2/433	5/28943	0.00216728	0.0255891	0.0177905	Smpd3/Fam20c	2
GO:0140205	BP	GO:0140205	oligopeptide import across plasma membrane	2/433	5/28943	0.00216728	0.0255891	0.0177905	Slc7a11/Slc15a2	2
GO:0140206	BP	GO:0140206	dipeptide import across plasma membrane	2/433	5/28943	0.00216728	0.0255891	0.0177905	Slc7a11/Slc15a2	2
GO:1990079	BP	GO:1990079	cartilage homeostasis	2/433	5/28943	0.00216728	0.0255891	0.0177905	Cytl1/Slc39a8	2
GO:0010812	BP	GO:0010812	negative regulation of cell-substrate adhesion	5/433	61/28943	0.00219038	0.0257865	0.0179278	Muc4/Plet1/Apod/Fbln1/Tacstd2	5
GO:0110148	BP	GO:0110148	biomineralization	9/433	188/28943	0.00219358	0.0257865	0.0179278	Msx2/Gpm6b/Cftr/Smpd3/Wnt4/Itgb6/Bmp4/Fgfr2/Fam20c	9
GO:0001649	BP	GO:0001649	osteoblast differentiation	10/433	225/28943	0.00220082	0.0258153	0.0179477	Msx2/Ffar4/Map2k6/Wnt4/Ltf/Adar/Wnt7b/Bmp4/Fam20c/Dlx5	10
GO:0045686	BP	GO:0045686	negative regulation of glial cell differentiation	4/433	37/28943	0.00220814	0.0258449	0.0179683	Hmga2/Hes1/Mycn/Bmp4	4
GO:0006873	BP	GO:0006873	cellular ion homeostasis	17/433	517/28943	0.00222985	0.0259127	0.0180155	Chga/Car2/Gpr39/Cftr/Stc2/Slc40a1/Slc39a8/Immt/Cyb561/Scgn/Slc35g1/Slc9a3r1/Slc34a2/Edn2/Atp13a4/Wfs1/Tesc	17
GO:0042472	BP	GO:0042472	inner ear morphogenesis	7/433	120/28943	0.00223319	0.0259127	0.0180155	Six1/Pls1/Myo3b/Lrig1/Slc9a3r1/Fgfr2/Dlx5	7
GO:0051702	BP	GO:0051702	biological process involved in interaction with symbiont	7/433	120/28943	0.00223319	0.0259127	0.0180155	Hmga2/Fmr1/Ltf/Napepld/Sftpd/Arg1/F2rl1	7
GO:0098773	BP	GO:0098773	skin epidermis development	7/433	120/28943	0.00223319	0.0259127	0.0180155	Fermt1/Msx2/Barx2/Tnfrsf19/Pdgfa/Foxq1/Fgfr2	7
GO:0050807	BP	GO:0050807	regulation of synapse organization	11/433	264/28943	0.00224123	0.0259501	0.0180415	Asic2/Six1/Ngef/Fmr1/Slc7a11/Abi2/Wnt7a/Nrg2/Oxtr/Srpx2/Camk2b	11
GO:0060485	BP	GO:0060485	mesenchyme development	12/433	304/28943	0.00225813	0.0260768	0.0181296	Msx2/Scx/Six1/Hmga2/Zeb2/Hes1/Mdm4/Wnt4/Rdh10/Wnt7b/Bmp4/Fgfr2	12
GO:1903555	BP	GO:1903555	regulation of tumor necrosis factor superfamily cytokine production	9/433	189/28943	0.00227361	0.0260768	0.0181296	Cd47/Spon2/Ptpn22/Ltf/Nod1/Pycard/Clu/Il33/Cyp2j6	9
GO:0008228	BP	GO:0008228	opsonization	3/433	18/28943	0.00229576	0.0260768	0.0181296	Cd47/Spon2/Sftpd	3
GO:0019755	BP	GO:0019755	one-carbon compound transport	3/433	18/28943	0.00229576	0.0260768	0.0181296	Car2/Car12/Slc14a1	3
GO:0044406	BP	GO:0044406	adhesion of symbiont to host	3/433	18/28943	0.00229576	0.0260768	0.0181296	Ltf/Gbp2b/Sftpd	3
GO:0046184	BP	GO:0046184	aldehyde biosynthetic process	3/433	18/28943	0.00229576	0.0260768	0.0181296	Wnt4/Kdm3a/Adh1	3
GO:0060572	BP	GO:0060572	morphogenesis of an epithelial bud	3/433	18/28943	0.00229576	0.0260768	0.0181296	Rdh10/Bmp4/Fgfr2	3
GO:1901160	BP	GO:1901160	primary amino compound metabolic process	3/433	18/28943	0.00229576	0.0260768	0.0181296	Rnf180/Ddc/Gch1	3
GO:1901570	BP	GO:1901570	fatty acid derivative biosynthetic process	3/433	18/28943	0.00229576	0.0260768	0.0181296	Pam/Hmgcll1/Ggt5	3
GO:0045444	BP	GO:0045444	fat cell differentiation	11/433	265/28943	0.00230775	0.0261577	0.0181858	Dio2/Msx2/Ffar4/Klf4/Six1/Hmga2/Hes1/Zfp516/Inhbb/Napepld/Lamb3	11
GO:0031349	BP	GO:0031349	positive regulation of defense response	12/433	305/28943	0.00231974	0.0262384	0.0182419	Cd47/Pla2g4a/Casp1/Nod1/Zbp1/C2cd4a/Pycard/Napepld/Nfkbiz/Il33/Arg1/F2rl1	12
GO:0090100	BP	GO:0090100	positive regulation of transmembrane receptor protein serine/threonine kinase signaling pathway	7/433	121/28943	0.0023405	0.0264177	0.0183666	Fermt1/Msx2/Zeb2/Hes1/Inhbb/Bmp4/Gipc1	7
GO:0070374	BP	GO:0070374	positive regulation of ERK1 and ERK2 cascade	10/433	227/28943	0.00234671	0.0264324	0.0183768	Ffar4/Iapp/Ptpn22/Nod1/Pycard/Pdgfa/Bmp4/Fgfr2/Cxcl17/F2rl1	10
GO:0072073	BP	GO:0072073	kidney epithelium development	8/433	155/28943	0.00239664	0.0269384	0.0187286	Six1/Hes1/Wnt4/Epcam/Wnt7b/Bmp4/Fgfr2/Tacstd2	8
GO:0050673	BP	GO:0050673	epithelial cell proliferation	17/433	521/28943	0.00241377	0.0270598	0.018813	Fermt1/Six1/Cdh1/Hmga2/Hes1/Esrp1/Mycn/Wnt7a/Scg2/Serpinb5/Bmp4/Fgfr2/Htra1/Dlx5/Arg1/Cxadr/Tacstd2	17
GO:0030595	BP	GO:0030595	leukocyte chemotaxis	10/433	228/28943	0.00242251	0.0270598	0.018813	Chga/Itga9/Dapk2/Scg2/Padi2/Edn2/Cxcl17/Pla2g7/Cxadr/F2rl1	10
GO:0044242	BP	GO:0044242	cellular lipid catabolic process	10/433	228/28943	0.00242251	0.0270598	0.018813	Pla2g4a/Plb1/Slc27a2/Smpd3/Lpin3/Smpdl3a/Napepld/Gdpd1/Pla2g7/Faah	10
GO:0072001	BP	GO:0072001	renal system development	13/433	348/28943	0.00244055	0.0272048	0.0189138	Six1/Hes1/Serpinb7/Wnt4/Ctnnd1/Epcam/Rdh10/Wnt7b/Pdgfa/Bmp4/Fgfr2/Wfs1/Tacstd2	13
GO:0009636	BP	GO:0009636	response to toxic substance	7/433	122/28943	0.00245173	0.027273	0.0189612	Ddc/Slc7a11/Trpm6/Aldh1a1/Mbp/Gch1/Sod3	7
GO:0001655	BP	GO:0001655	urogenital system development	14/433	391/28943	0.00249136	0.0276291	0.0192088	Six1/Hes1/Serpinb7/Wnt4/Ctnnd1/Epcam/Rdh10/Wnt7b/Pdgfa/Serpinb5/Bmp4/Fgfr2/Wfs1/Tacstd2	14
GO:2001235	BP	GO:2001235	positive regulation of apoptotic signaling pathway	8/433	156/28943	0.00249401	0.0276291	0.0192088	Bcl2l14/Inhbb/Rnf183/Pycard/Clu/Slc9a3r1/Camk2b/Ctsh	8
GO:0042446	BP	GO:0042446	hormone biosynthetic process	5/433	63/28943	0.00252576	0.0278876	0.0193885	Dio2/Stc2/Wnt4/Dio1/Por	5
GO:0051650	BP	GO:0051650	establishment of vesicle localization	9/433	192/28943	0.0025277	0.0278876	0.0193885	Myo1b/Dync1i1/Exoc1/Sec16b/Myo5c/Smpd3/a/Myo1d/Fgfr2	9
GO:0051090	BP	GO:0051090	regulation of DNA-binding transcription factor activity	15/433	436/28943	0.00259765	0.0286007	0.0198843	Msx2/Klf4/Hmga2/Hes1/Cytl1/Jup/Ltf/Nod1/Bhlhe40/Anxa3/Pycard/Clu/Ripk4/Wfs1/Il18r1	15
GO:0032640	BP	GO:0032640	tumor necrosis factor production	9/433	193/28943	0.00261723	0.0287575	0.0199933	Cd47/Spon2/Ptpn22/Ltf/Nod1/Pycard/Clu/Il33/Cyp2j6	9
GO:0042326	BP	GO:0042326	negative regulation of phosphorylation	14/433	394/28943	0.00266888	0.0292652	0.0203463	Deptor/Atxn1/Ntf3/Cadm4/Grb10/Ptpn22/Adar/Gadd45g/Pycard/Bmp4/Pmepa1/Ier3/Fbln1/Ddit4	14
GO:0021983	BP	GO:0021983	pituitary gland development	4/433	39/28943	0.0026862	0.0292666	0.0203472	Hmga2/Hes1/Wnt4/Bmp4	4
GO:0090162	BP	GO:0090162	establishment of epithelial cell polarity	4/433	39/28943	0.0026862	0.0292666	0.0203472	Fermt1/Frmd4b/Hes1/Slc9a3r1	4
GO:0016114	BP	GO:0016114	terpenoid biosynthetic process	3/433	19/28943	0.00269618	0.0292666	0.0203472	Aldh1a1/Rdh10/Dhrs9	3
GO:0045836	BP	GO:0045836	positive regulation of meiotic nuclear division	3/433	19/28943	0.00269618	0.0292666	0.0203472	Msx2/Wnt4/Camk2b	3
GO:0045837	BP	GO:0045837	negative regulation of membrane potential	3/433	19/28943	0.00269618	0.0292666	0.0203472	Ltf/Hebp2/Atp5g1	3
GO:0051851	BP	GO:0051851	modulation by host of symbiont process	5/433	64/28943	0.00270674	0.0293221	0.0203858	Hmga2/Fmr1/Ltf/Napepld/Sftpd	5
GO:0048545	BP	GO:0048545	response to steroid hormone	10/433	232/28943	0.00274562	0.0296836	0.0206371	Hmga2/Fibin/Mbp/Kdm3a/Padi2/Oxtr/Adh1/Bmp4/Ddit4/Por	10
GO:0045104	BP	GO:0045104	intermediate filament cytoskeleton organization	6/433	93/28943	0.00276235	0.0296856	0.0206386	Krt19/Dsp/Pkp2/Krt8/Krt5/Krt14	6
GO:0055072	BP	GO:0055072	iron ion homeostasis	6/433	93/28943	0.00276235	0.0296856	0.0206386	Steap1/Cp/Slc40a1/Slc39a8/Ltf/Cyb561	6
GO:2001057	BP	GO:2001057	reactive nitrogen species metabolic process	6/433	93/28943	0.00276235	0.0296856	0.0206386	Cd47/Klf4/Smpd3/Clu/Thap4/Por	6
GO:0032649	BP	GO:0032649	regulation of interferon-gamma production	7/433	125/28943	0.00280997	0.0301372	0.0209525	Cd47/Ptpn22/Pycard/Il20rb/Il33/Il18r1/F2rl1	7
GO:0050803	BP	GO:0050803	regulation of synapse structure or activity	11/433	272/28943	0.00281949	0.0301792	0.0209817	Asic2/Six1/Ngef/Fmr1/Slc7a11/Abi2/Wnt7a/Nrg2/Oxtr/Srpx2/Camk2b	11
GO:0033674	BP	GO:0033674	positive regulation of kinase activity	15/433	440/28943	0.00283016	0.0301882	0.020988	Ntf3/Hmga2/Zeb2/Gpr39/Map2k6/Nedd9/Fzd10/Abi2/Ltf/Pdgfa/Dok7/Clu/Adra2c/Fgfr2/Card10	15
GO:0007160	BP	GO:0007160	cell-matrix adhesion	10/433	233/28943	0.00283155	0.0301882	0.020988	Fermt1/Muc4/Gpm6b/Itga9/Plet1/Jup/Wnt4/Itgb6/Apod/Slk	10
GO:0060562	BP	GO:0060562	epithelial tube morphogenesis	14/433	397/28943	0.00285667	0.0303959	0.0211324	Msx2/Six1/Hmga2/Zeb2/Hes1/Esrp1/Grhl2/Mycn/Wnt4/Rdh10/Bmp4/Fgfr2/Ctsh/Tacstd2	14
GO:0009100	BP	GO:0009100	glycoprotein metabolic process	13/433	355/28943	0.00289424	0.0306417	0.0213033	Galnt3/Fut9/Cytl1/Slc39a8/Dcn/Chst7/Pcsk6/Slc35c1/Galnt7/Il33/Chst8/Bace2/St6galnac2	13
GO:0042129	BP	GO:0042129	regulation of T cell proliferation	9/433	196/28943	0.00290098	0.0306417	0.0213033	Vtcn1/Hes1/Igfbp2/Ptpn22/Pycard/Il20rb/Bmp4/Sftpd/Arg1	9
GO:0071706	BP	GO:0071706	tumor necrosis factor superfamily cytokine production	9/433	196/28943	0.00290098	0.0306417	0.0213033	Cd47/Spon2/Ptpn22/Ltf/Nod1/Pycard/Clu/Il33/Cyp2j6	9
GO:0045103	BP	GO:0045103	intermediate filament-based process	6/433	94/28943	0.00291424	0.0306417	0.0213033	Krt19/Dsp/Pkp2/Krt8/Krt5/Krt14	6
GO:0120193	BP	GO:0120193	tight junction organization	6/433	94/28943	0.00291424	0.0306417	0.0213033	Cdh1/Micall2/Cldn10/Cldn2/F11r/Grhl2	6
GO:0043542	BP	GO:0043542	endothelial cell migration	10/433	234/28943	0.00291961	0.0306417	0.0213033	Klf4/Jup/Wnt7a/Dcn/Anxa3/Edn2/Bmp4/Gipc1/Srpx2/Card10	10
GO:1901617	BP	GO:1901617	organic hydroxy compound biosynthetic process	10/433	234/28943	0.00291961	0.0306417	0.0213033	Zeb2/Ddc/Cftr/Slc7a11/Slc27a2/Wnt4/Gch1/a/Gipc1/Por	10
GO:0002718	BP	GO:0002718	regulation of cytokine production involved in immune response	7/433	126/28943	0.00293788	0.0307734	0.0213948	Spon2/Casp1/Nod1/Pycard/Arg1/Il18r1/F2rl1	7
GO:0042398	BP	GO:0042398	cellular modified amino acid biosynthetic process	4/433	40/28943	0.00294988	0.0308392	0.0214405	Slc7a11/Ckmt1/Gch1/Ggt5	4
GO:0006865	BP	GO:0006865	amino acid transport	8/433	161/28943	0.0030282	0.0314746	0.0218823	Slc7a11/Slc9a3r1/Slc6a13/Gipc1/Llgl2/Slc25a13/Arg1/Lrrc8d	8
GO:0045667	BP	GO:0045667	regulation of osteoblast differentiation	8/433	161/28943	0.0030282	0.0314746	0.0218823	Msx2/Ffar4/Wnt4/Ltf/Wnt7b/Bmp4/Fam20c/Dlx5	8
GO:0072006	BP	GO:0072006	nephron development	8/433	161/28943	0.0030282	0.0314746	0.0218823	Six1/Hes1/Serpinb7/Wnt4/Ctnnd1/Wnt7b/Bmp4/Tacstd2	8
GO:1902532	BP	GO:1902532	negative regulation of intracellular signal transduction	17/433	533/28943	0.00304317	0.0315693	0.0219481	Deptor/Klf4/Ezr/Dynlt1b/Mdm4/Ptpn22/Wwc1/Pycard/Vnn1/Clu/Slc9a3r1/Bmp4/Vgll4/Wfs1/Fbln1/Ddit4/F2rl1	17
GO:0030168	BP	GO:0030168	platelet activation	6/433	95/28943	0.00307229	0.03181	0.0221155	Pla2g4a/Slc7a11/F11r/Tec/Pdgfa/Adra2c	6
GO:0006493	BP	GO:0006493	protein O-linked glycosylation	5/433	66/28943	0.00309656	0.0319998	0.0222474	Galnt3/Fut9/Slc35c1/Galnt7/St6galnac2	5
GO:0030050	BP	GO:0030050	vesicle transport along actin filament	3/433	20/28943	0.00313704	0.0321518	0.0223532	Myo1b/Myo5c/Myo1d	3
GO:0048589	BP	GO:0048589	developmental growth	23/433	819/28943	0.00316087	0.0321518	0.0223532	Msx2/Six1/Hmga2/Ezr/Zeb2/Pls1/Stc2/Smpd3/Grhl2/Wnt7a/Tec/Wwc1/Rdh10/Agr2/Wnt7b/Edn2/Bmp4/Fgfr2/Vgll4/Llgl2/Atp5g1/Cxadr/Por	23
GO:0006936	BP	GO:0006936	muscle contraction	12/433	317/28943	0.00317208	0.0321518	0.0223532	Chga/Map2k6/Smpd3/Jup/Dsc2/Dsp/Pkp2/Oxtr/Edn2/Adra2c/Dsg2/Chrnb1	12
GO:0042098	BP	GO:0042098	T cell proliferation	10/433	237/28943	0.003197	0.0321518	0.0223532	Vtcn1/Hes1/Igfbp2/Ptpn22/Wnt4/Pycard/Il20rb/Bmp4/Sftpd/Arg1	10
GO:0043123	BP	GO:0043123	positive regulation of I-kappaB kinase/NF-kappaB signaling	7/433	128/28943	0.00320702	0.0321518	0.0223532	Unc5cl/Tnfrsf19/Lurap1l/Casp1/Ltf/Nod1/F2rl1	7
GO:0048565	BP	GO:0048565	digestive tract development	7/433	128/28943	0.00320702	0.0321518	0.0223532	Cdh1/Hes1/Myb/Agr2/Pdgfa/Bmp4/Fgfr2	7
GO:0003205	BP	GO:0003205	cardiac chamber development	9/433	199/28943	0.00320848	0.0321518	0.0223532	Msx2/Hes1/Ltbp1/Mdm4/Grhl2/Dsp/Pkp2/Bmp4/Fgfr2	9
GO:0006640	BP	GO:0006640	monoacylglycerol biosynthetic process	2/433	6/28943	0.00321877	0.0321518	0.0223532	Pla2g4a/Dgat2	2
GO:0006751	BP	GO:0006751	glutathione catabolic process	2/433	6/28943	0.00321877	0.0321518	0.0223532	Chac2/Ggt5	2
GO:0007231	BP	GO:0007231	osmosensory signaling pathway	2/433	6/28943	0.00321877	0.0321518	0.0223532	Casp1/Pycard	2
GO:0015734	BP	GO:0015734	taurine transport	2/433	6/28943	0.00321877	0.0321518	0.0223532	Slc6a13/Lrrc8d	2
GO:0042918	BP	GO:0042918	alkanesulfonate transport	2/433	6/28943	0.00321877	0.0321518	0.0223532	Slc6a13/Lrrc8d	2
GO:0060066	BP	GO:0060066	oviduct development	2/433	6/28943	0.00321877	0.0321518	0.0223532	Cdh1/Wnt7a	2
GO:0060684	BP	GO:0060684	epithelial-mesenchymal cell signaling	2/433	6/28943	0.00321877	0.0321518	0.0223532	Pdgfa/Bmp4	2
GO:0070291	BP	GO:0070291	N-acylethanolamine metabolic process	2/433	6/28943	0.00321877	0.0321518	0.0223532	Napepld/Gdpd1	2
GO:0071286	BP	GO:0071286	cellular response to magnesium ion	2/433	6/28943	0.00321877	0.0321518	0.0223532	Ank3/Smpd3	2
GO:0072049	BP	GO:0072049	comma-shaped body morphogenesis	2/433	6/28943	0.00321877	0.0321518	0.0223532	Hes1/Bmp4	2
GO:0090427	BP	GO:0090427	activation of meiosis	2/433	6/28943	0.00321877	0.0321518	0.0223532	Msx2/Camk2b	2
GO:0001709	BP	GO:0001709	cell fate determination	4/433	41/28943	0.00323072	0.0322114	0.0223946	Ntf3/Hes1/Wnt7a/Bmp4	4
GO:0051701	BP	GO:0051701	biological process involved in interaction with host	8/433	163/28943	0.00326523	0.0324953	0.022592	Dynlt1b/Tmprss11e/Ltf/Gbp2b/Fuca2/Sftpd/Fbln1/Tmprss4	8
GO:0060350	BP	GO:0060350	endochondral bone morphogenesis	5/433	67/28943	0.00330594	0.0328398	0.0228315	Scx/Smpd3/Bmp4/Dlx5/Por	5
GO:0008285	BP	GO:0008285	negative regulation of cell population proliferation	22/433	774/28943	0.00334083	0.0331253	0.0230299	Fermt1/Msx2/Klf4/Cdh1/Ptpru/Iapp/Vtcn1/Hes1/Adgrg1/Apod/Il20rb/Slc9a3r1/Il33/Bmp4/Fgfr2/Vgll4/Sftpd/Fbln1/Gjb6/Arg1/Cxadr/Tesc	22
GO:0002699	BP	GO:0002699	positive regulation of immune effector process	12/433	320/28943	0.00342061	0.033854	0.0235365	Spon2/Ptpn22/Casp1/Nod1/Myb/Pycard/Nfkbiz/Il33/Arg1/Il18r1/Stxbp2/F2rl1	12
GO:1905475	BP	GO:1905475	regulation of protein localization to membrane	9/433	201/28943	0.00342736	0.0338585	0.0235397	Cdh1/Ezr/Ank3/Slc7a11/Pls1/Dpp6/Agr2/Tmbim1/Camk2b	9
GO:0061564	BP	GO:0061564	axon development	17/433	540/28943	0.00346944	0.0342115	0.0237851	Nrep/Klf4/Ntf3/Zeb2/Ank3/Dynlt1b/Alcam/Lama3/Wnt7a/Mbp/Wnt7b/Edn2/Fgfr2/Crtac1/Lamc2/Dlx5/Atp5g1	17
GO:0034220	BP	GO:0034220	ion transmembrane transport	26/433	975/28943	0.00350307	0.0344762	0.0239691	Asic2/Fmr1/Iapp/Gpr39/Cftr/Ank3/Slc7a11/Ano4/Trpm6/Dpp6/Slc40a1/Ptpn22/Slc39a8/Trpv6/Slc35g1/Slc9a3r1/Slc6a13/Bmp4/Kcnk1/Slc25a13/Arg1/Gabrp/Lrrc8d/Atp5g1/Chrnb1/Tesc	26
GO:0006801	BP	GO:0006801	superoxide metabolic process	5/433	68/28943	0.00352531	0.0344762	0.0239691	Cyb5r4/Gch1/Sod3/Noxa1/F2rl1	5
GO:0042440	BP	GO:0042440	pigment metabolic process	5/433	68/28943	0.00352531	0.0344762	0.0239691	Zeb2/Slc7a11/Cyb5r4/a/Gipc1	5
GO:0061081	BP	GO:0061081	positive regulation of myeloid leukocyte cytokine production involved in immune response	4/433	42/28943	0.00352922	0.0344762	0.0239691	Spon2/Casp1/Nod1/Pycard	4
GO:1900744	BP	GO:1900744	regulation of p38MAPK cascade	4/433	42/28943	0.00352922	0.0344762	0.0239691	Ezr/Ptpn22/Gadd45g/Bmp4	4
GO:0007179	BP	GO:0007179	transforming growth factor beta receptor signaling pathway	9/433	202/28943	0.00354111	0.0344762	0.0239691	Nrep/Fermt1/Zeb2/Ltbp1/Itgb6/Fos/Htra1/Gipc1/Pmepa1	9
GO:0098656	BP	GO:0098656	anion transmembrane transport	9/433	202/28943	0.00354111	0.0344762	0.0239691	Cftr/Slc7a11/Ano4/Slc39a8/Slc6a13/Slc25a13/Arg1/Gabrp/Lrrc8d	9
GO:0007417	BP	GO:0007417	central nervous system development	26/433	976/28943	0.00355023	0.0345026	0.0239875	Atxn1/Six1/Ntf3/Hmga2/Fmr1/Zeb2/Hes1/Slc7a11/Phactr1/Adgrg1/Grhl2/Mycn/Wnt4/Wnt7a/Capg/Olig3/Git2/Wnt7b/Clu/Il33/Bmp4/Fgfr2/Crtac1/Dlx5/Aspa/Ddit4	26
GO:0006979	BP	GO:0006979	response to oxidative stress	14/433	407/28943	0.00356264	0.0345608	0.024028	Slc7a11/Stc2/Ncoa7/Txnrd2/Smpd3/Aldh1a1/Fos/Apod/Gch1/Vnn1/Sod3/Bmp4/Gja3/Upk3bl	14
GO:0006720	BP	GO:0006720	isoprenoid metabolic process	6/433	98/28943	0.00358492	0.0346761	0.0241081	Plb1/Aldh1a1/Rdh10/Adh1/Cyp2j6/Dhrs9	6
GO:0015849	BP	GO:0015849	organic acid transport	12/433	322/28943	0.00359486	0.0346761	0.0241081	Pla2g4a/Map2k6/Slc7a11/Slc27a2/Slc9a3r1/Slc6a13/Gipc1/Llgl2/Slc25a13/Arg1/Lrrc8d/Pla2g2e	12
GO:2001234	BP	GO:2001234	negative regulation of apoptotic signaling pathway	10/433	241/28943	0.00359906	0.0346761	0.0241081	Mdm4/Wnt4/Scg2/Eya2/Vnn1/Clu/Bmp4/Tmbim1/Wfs1/Ier3	10
GO:0001502	BP	GO:0001502	cartilage condensation	3/433	21/28943	0.00361961	0.0346761	0.0241081	Barx2/Mycn/Wnt7a	3
GO:0006071	BP	GO:0006071	glycerol metabolic process	3/433	21/28943	0.00361961	0.0346761	0.0241081	Pla2g4a/Mogat1/Dgat2	3
GO:0016486	BP	GO:0016486	peptide hormone processing	3/433	21/28943	0.00361961	0.0346761	0.0241081	Pcsk6/Chst8/Scg5	3
GO:2000136	BP	GO:2000136	regulation of cell proliferation involved in heart morphogenesis	3/433	21/28943	0.00361961	0.0346761	0.0241081	Six1/Hes1/Bmp4	3
GO:0010562	BP	GO:0010562	positive regulation of phosphorus metabolic process	25/433	929/28943	0.0037042	0.0352045	0.0244755	Chga/Ifne/Ntf3/Hmga2/Fmr1/Iapp/Zeb2/Gpr39/Map2k6/Hes1/Grb10/Nedd9/Fzd10/Abi2/Fndc1/Inhbb/Ltf/Ctnnd1/Pdgfa/Dok7/Clu/Adra2c/Bmp4/Fgfr2/Card10	25
GO:0045937	BP	GO:0045937	positive regulation of phosphate metabolic process	25/433	929/28943	0.0037042	0.0352045	0.0244755	Chga/Ifne/Ntf3/Hmga2/Fmr1/Iapp/Zeb2/Gpr39/Map2k6/Hes1/Grb10/Nedd9/Fzd10/Abi2/Fndc1/Inhbb/Ltf/Ctnnd1/Pdgfa/Dok7/Clu/Adra2c/Bmp4/Fgfr2/Card10	25
GO:0071560	BP	GO:0071560	cellular response to transforming growth factor beta stimulus	10/433	242/28943	0.00370559	0.0352045	0.0244755	Nrep/Fermt1/Scx/Zeb2/Ltbp1/Itgb6/Fos/Htra1/Gipc1/Pmepa1	10
GO:0010563	BP	GO:0010563	negative regulation of phosphorus metabolic process	15/433	453/28943	0.00370746	0.0352045	0.0244755	Deptor/Atxn1/Ntf3/Cadm4/Grb10/Ptpn22/Adar/Gadd45g/Pycard/Pdgfa/Bmp4/Pmepa1/Ier3/Fbln1/Ddit4	15
GO:0045936	BP	GO:0045936	negative regulation of phosphate metabolic process	15/433	453/28943	0.00370746	0.0352045	0.0244755	Deptor/Atxn1/Ntf3/Cadm4/Grb10/Ptpn22/Adar/Gadd45g/Pycard/Pdgfa/Bmp4/Pmepa1/Ier3/Fbln1/Ddit4	15
GO:0051962	BP	GO:0051962	positive regulation of nervous system development	13/433	366/28943	0.00374449	0.0354935	0.0246764	Asic2/Atxn1/Ntf3/Fmr1/Zeb2/Hes1/Wnt7a/Oxtr/Il33/Srpx2/Camk2b/Aspa/Atp5g1	13
GO:0086003	BP	GO:0086003	cardiac muscle cell contraction	5/433	69/28943	0.00375493	0.03553	0.0247018	Jup/Dsc2/Dsp/Pkp2/Dsg2	5
GO:0048864	BP	GO:0048864	stem cell development	6/433	99/28943	0.00376913	0.0356018	0.0247517	Zeb2/Hes1/Wnt7a/Rdh10/Wnt7b/Bmp4	6
GO:0032675	BP	GO:0032675	regulation of interleukin-6 production	8/433	167/28943	0.00378233	0.0356638	0.0247948	Cd47/Spon2/Ptpn22/Nod1/Mbp/Pycard/Il33/F2rl1	8
GO:0046822	BP	GO:0046822	regulation of nucleocytoplasmic transport	7/433	132/28943	0.00380139	0.0357184	0.0248328	Fermt1/Cdh1/Ptpn22/Jup/Apod/Bmp4/Ier3	7
GO:0060048	BP	GO:0060048	cardiac muscle contraction	7/433	132/28943	0.00380139	0.0357184	0.0248328	Chga/Map2k6/Jup/Dsc2/Dsp/Pkp2/Dsg2	7
GO:0050727	BP	GO:0050727	regulation of inflammatory response	13/433	367/28943	0.00383088	0.0359329	0.0249819	Cd47/Pla2g4a/Ffar4/Casp1/Zbp1/C2cd4a/Pycard/Napepld/Il20rb/Nfkbiz/Il33/Cxcl17/Ier3	13
GO:0070050	BP	GO:0070050	neuron cellular homeostasis	4/433	43/28943	0.00384592	0.0359486	0.0249928	Car2/Gpr39/Immt/Scgn	4
GO:1901568	BP	GO:1901568	fatty acid derivative metabolic process	4/433	43/28943	0.00384592	0.0359486	0.0249928	Pam/Hmgcll1/Ggt5/Dgat2	4
GO:0051656	BP	GO:0051656	establishment of organelle localization	15/433	455/28943	0.00386033	0.0360208	0.025043	Chga/Myo1b/Dync1i1/Ezr/Exoc1/Sec16b/Dynlt1b/Myo5c/Smpd3/a/Myo1d/Slc9a3r1/Fgfr2/Llgl2/Stxbp2	15
GO:0051640	BP	GO:0051640	organelle localization	18/433	593/28943	0.0039113	0.0363975	0.0253049	Chga/Myo1b/Dync1i1/Ezr/Exoc1/Cftr/Sec16b/Dynlt1b/Myo5c/Smpd3/a/Myo1d/Slc9a3r1/Fgfr2/Esyt3/Llgl2/Mlph/Stxbp2	18
GO:0030856	BP	GO:0030856	regulation of epithelial cell differentiation	8/433	168/28943	0.00392097	0.0363975	0.0253049	Msx2/Zeb2/Hes1/Esrp1/F11r/Grhl2/Mycn/Bmp4	8
GO:0050768	BP	GO:0050768	negative regulation of neurogenesis	8/433	168/28943	0.00392097	0.0363975	0.0253049	Hmga2/Hes1/Dynlt1b/Mycn/Wnt7a/Mbp/Wnt7b/Bmp4	8
GO:0034143	BP	GO:0034143	regulation of toll-like receptor 4 signaling pathway	3/433	22/28943	0.00414504	0.0379983	0.0264178	Ptpn22/Ltf/F2rl1	3
GO:0044851	BP	GO:0044851	hair cycle phase	3/433	22/28943	0.00414504	0.0379983	0.0264178	Fermt1/Msx2/Barx2	3
GO:0061323	BP	GO:0061323	cell proliferation involved in heart morphogenesis	3/433	22/28943	0.00414504	0.0379983	0.0264178	Six1/Hes1/Bmp4	3
GO:0072170	BP	GO:0072170	metanephric tubule development	3/433	22/28943	0.00414504	0.0379983	0.0264178	Hes1/Wnt4/Wnt7b	3
GO:0072273	BP	GO:0072273	metanephric nephron morphogenesis	3/433	22/28943	0.00414504	0.0379983	0.0264178	Hes1/Wnt4/Bmp4	3
GO:0099515	BP	GO:0099515	actin filament-based transport	3/433	22/28943	0.00414504	0.0379983	0.0264178	Myo1b/Myo5c/Myo1d	3
GO:0002700	BP	GO:0002700	regulation of production of molecular mediator of immune response	9/433	207/28943	0.00415504	0.0379983	0.0264178	Spon2/Ptpn22/Casp1/Nod1/Pycard/Il33/Arg1/Il18r1/F2rl1	9
GO:0002573	BP	GO:0002573	myeloid leukocyte differentiation	10/433	246/28943	0.00415694	0.0379983	0.0264178	Iapp/Car2/L3mbtl3/Itgb6/Fos/Prxl2a/Bmp4/Fam20c/Tesc/F2rl1	10
GO:0071559	BP	GO:0071559	response to transforming growth factor beta	10/433	246/28943	0.00415694	0.0379983	0.0264178	Nrep/Fermt1/Scx/Zeb2/Ltbp1/Itgb6/Fos/Htra1/Gipc1/Pmepa1	10
GO:0001562	BP	GO:0001562	response to protozoan	4/433	44/28943	0.00418131	0.0380917	0.0264828	Vtcn1/Gbp2b/Ier3/Arg1	4
GO:0050918	BP	GO:0050918	positive chemotaxis	4/433	44/28943	0.00418131	0.0380917	0.0264828	Ntf3/Scg2/Wnt7b/F2rl1	4
GO:0071248	BP	GO:0071248	cellular response to metal ion	8/433	170/28943	0.00421002	0.0382884	0.0266195	Cpne8/Cdh1/Gpr39/Ank3/Smpd3/Slc40a1/Fos/Aoc1	8
GO:0009101	BP	GO:0009101	glycoprotein biosynthetic process	11/433	287/28943	0.00422504	0.0383602	0.0266695	Galnt3/Fut9/Cytl1/Slc39a8/Chst7/Slc35c1/Galnt7/Il33/Chst8/Bace2/St6galnac2	11
GO:0042733	BP	GO:0042733	embryonic digit morphogenesis	5/433	71/28943	0.004246	0.0384209	0.0267116	Msx2/Grhl2/Mycn/Wnt7a/Bmp4	5
GO:0046503	BP	GO:0046503	glycerolipid catabolic process	5/433	71/28943	0.004246	0.0384209	0.0267116	Pla2g4a/Plb1/Gdpd1/Pla2g7/Faah	5
GO:0010632	BP	GO:0010632	regulation of epithelial cell migration	10/433	248/28943	0.00439834	0.0391239	0.0272004	Klf4/Jup/Wnt7a/Dcn/Anxa3/Bmp4/Srpx2/Ctsh/Card10/Tacstd2	10
GO:0032532	BP	GO:0032532	regulation of microvillus length	2/433	7/28943	0.00446176	0.0391239	0.0272004	Ezr/Pls1	2
GO:0034141	BP	GO:0034141	positive regulation of toll-like receptor 3 signaling pathway	2/433	7/28943	0.00446176	0.0391239	0.0272004	Ptpn22/F2rl1	2
GO:0035989	BP	GO:0035989	tendon development	2/433	7/28943	0.00446176	0.0391239	0.0272004	Scx/Bmp4	2
GO:0038030	BP	GO:0038030	non-canonical Wnt signaling pathway via MAPK cascade	2/433	7/28943	0.00446176	0.0391239	0.0272004	Fzd10/Wnt4	2
GO:0042427	BP	GO:0042427	serotonin biosynthetic process	2/433	7/28943	0.00446176	0.0391239	0.0272004	Ddc/Gch1	2
GO:0042904	BP	GO:0042904	9-cis-retinoic acid biosynthetic process	2/433	7/28943	0.00446176	0.0391239	0.0272004	Aldh1a1/Dhrs9	2
GO:0042905	BP	GO:0042905	9-cis-retinoic acid metabolic process	2/433	7/28943	0.00446176	0.0391239	0.0272004	Aldh1a1/Dhrs9	2
GO:0044341	BP	GO:0044341	sodium-dependent phosphate transport	2/433	7/28943	0.00446176	0.0391239	0.0272004	Stc2/Slc34a2	2
GO:0045110	BP	GO:0045110	intermediate filament bundle assembly	2/433	7/28943	0.00446176	0.0391239	0.0272004	Pkp2/Krt14	2
GO:0046469	BP	GO:0046469	platelet activating factor metabolic process	2/433	7/28943	0.00446176	0.0391239	0.0272004	Pla2g4a/Pla2g7	2
GO:0060482	BP	GO:0060482	lobar bronchus development	2/433	7/28943	0.00446176	0.0391239	0.0272004	Agr2/Wnt7b	2
GO:0060501	BP	GO:0060501	positive regulation of epithelial cell proliferation involved in lung morphogenesis	2/433	7/28943	0.00446176	0.0391239	0.0272004	Hmga2/Fgfr2	2
GO:0070948	BP	GO:0070948	regulation of neutrophil mediated cytotoxicity	2/433	7/28943	0.00446176	0.0391239	0.0272004	Arg1/F2rl1	2
GO:0072161	BP	GO:0072161	mesenchymal cell differentiation involved in kidney development	2/433	7/28943	0.00446176	0.0391239	0.0272004	Wnt4/Bmp4	2
GO:1901162	BP	GO:1901162	primary amino compound biosynthetic process	2/433	7/28943	0.00446176	0.0391239	0.0272004	Ddc/Gch1	2
GO:1903753	BP	GO:1903753	negative regulation of p38MAPK cascade	2/433	7/28943	0.00446176	0.0391239	0.0272004	Ezr/Ptpn22	2
GO:1990349	BP	GO:1990349	gap junction-mediated intercellular transport	2/433	7/28943	0.00446176	0.0391239	0.0272004	Gjb6/Gja3	2
GO:2001012	BP	GO:2001012	mesenchymal cell differentiation involved in renal system development	2/433	7/28943	0.00446176	0.0391239	0.0272004	Wnt4/Bmp4	2
GO:0021536	BP	GO:0021536	diencephalon development	5/433	72/28943	0.00450796	0.039464	0.0274369	Hmga2/Zeb2/Hes1/Wnt4/Bmp4	5
GO:0051961	BP	GO:0051961	negative regulation of nervous system development	8/433	172/28943	0.0045152	0.039464	0.0274369	Hmga2/Hes1/Dynlt1b/Mycn/Wnt7a/Mbp/Wnt7b/Bmp4	8
GO:0010935	BP	GO:0010935	regulation of macrophage cytokine production	4/433	45/28943	0.0045359	0.0395807	0.027518	Spon2/Casp1/Nod1/Pycard	4
GO:0046942	BP	GO:0046942	carboxylic acid transport	11/433	290/28943	0.00456366	0.0397231	0.027617	Pla2g4a/Slc16a14/Map2k6/Slc7a11/Slc9a3r1/Slc6a13/Gipc1/Slc25a13/Arg1/Lrrc8d/Pla2g2e	11
GO:0001819	BP	GO:0001819	positive regulation of cytokine production	16/433	509/28943	0.00456774	0.0397231	0.027617	Fermt1/Vtcn1/Spon2/Ptpn22/Serpinb7/Casp1/Nod1/Mbp/Pycard/Clu/Il20rb/Il33/Cyp2j6/Cxcl17/Il18r1/F2rl1	16
GO:0070664	BP	GO:0070664	negative regulation of leukocyte proliferation	6/433	103/28943	0.0045768	0.0397231	0.027617	Vtcn1/Il20rb/Il33/Bmp4/Sftpd/Arg1	6
GO:0046879	BP	GO:0046879	hormone secretion	13/433	375/28943	0.00458173	0.0397231	0.027617	Dio2/Ffar4/Chga/Hmga2/Gpr39/Cftr/Smpd3/Cyb5r4/Inhbb/Rph3al/Trpv6/Edn2/Scg5	13
GO:0002697	BP	GO:0002697	regulation of immune effector process	15/433	464/28943	0.00461345	0.0399337	0.0277634	Cd47/Muc4/Spon2/Ptpn22/Casp1/Nod1/Myb/Pycard/Il20rb/Nfkbiz/Il33/Arg1/Il18r1/Stxbp2/F2rl1	15
GO:0098657	BP	GO:0098657	import into cell	10/433	250/28943	0.00465064	0.0401883	0.0279404	Gpm6b/Iapp/Slc7a11/Slc27a2/Smpd3/Slc39a8/Slc15a2/Trpv6/Slc6a13/Arg1	10
GO:0001959	BP	GO:0001959	regulation of cytokine-mediated signaling pathway	7/433	137/28943	0.00465778	0.0401883	0.0279404	Casp1/Adar/Zbp1/Padi2/Pycard/Arg1/F2rl1	7
GO:0006941	BP	GO:0006941	striated muscle contraction	8/433	173/28943	0.00467403	0.0402639	0.027993	Chga/Map2k6/Jup/Dsc2/Dsp/Pkp2/Dsg2/Chrnb1	8
GO:0051047	BP	GO:0051047	positive regulation of secretion	14/433	420/28943	0.00468699	0.0402897	0.0280109	Pla2g4a/Ffar4/Ezr/Exoc1/Gpr39/Cftr/Map2k6/Smpd3/Inhbb/Rph3al/Oxtr/Edn2/Stxbp2/F2rl1	14
GO:0002683	BP	GO:0002683	negative regulation of immune system process	15/433	465/28943	0.00470403	0.0402897	0.0280109	Cd47/Muc4/Iapp/Vtcn1/Ezr/Ptpn22/Adar/Apod/Padi2/Il20rb/Il33/Bmp4/Tmem176b/Sftpd/Arg1	15
GO:0030728	BP	GO:0030728	ovulation	3/433	23/28943	0.00471443	0.0402897	0.0280109	Pla2g4a/Inhbb/Edn2	3
GO:0042219	BP	GO:0042219	cellular modified amino acid catabolic process	3/433	23/28943	0.00471443	0.0402897	0.0280109	Dio2/Chac2/Ggt5	3
GO:0060088	BP	GO:0060088	auditory receptor cell stereocilium organization	3/433	23/28943	0.00471443	0.0402897	0.0280109	Pls1/Myo3b/Slc9a3r1	3
GO:0030510	BP	GO:0030510	regulation of BMP signaling pathway	6/433	104/28943	0.0047972	0.0409321	0.0284575	Msx2/Grem2/Hes1/Chrdl2/Bmp4/Htra1	6
GO:0051051	BP	GO:0051051	negative regulation of transport	16/433	512/28943	0.00482733	0.0410813	0.0285612	Cd47/Fermt1/Ffar4/Gpm6b/Chga/Fmr1/Gpr39/Hes1/Ank3/Grb10/Inhbb/Apod/Slc9a3r1/Oxtr/Edn2/Sftpd	16
GO:0008277	BP	GO:0008277	regulation of G protein-coupled receptor signaling pathway	7/433	138/28943	0.00484521	0.0410813	0.0285612	Arrdc3/Chga/Dynlt1b/Rgs12/Rph3al/Git2/Camk2b	7
GO:0010811	BP	GO:0010811	positive regulation of cell-substrate adhesion	7/433	138/28943	0.00484521	0.0410813	0.0285612	Egfl6/Fermt1/Nedd9/Jup/Wnt4/Agr2/Fbln1	7
GO:0017015	BP	GO:0017015	regulation of transforming growth factor beta receptor signaling pathway	7/433	138/28943	0.00484521	0.0410813	0.0285612	Nrep/Fermt1/Zeb2/Ltbp1/Htra1/Gipc1/Pmepa1	7
GO:0050863	BP	GO:0050863	regulation of T cell activation	13/433	378/28943	0.00489213	0.0413687	0.028761	Cd47/Vtcn1/Hes1/Igfbp2/Ptpn22/Myb/Pycard/Vnn1/Il20rb/Nfkbiz/Bmp4/Sftpd/Arg1	13
GO:0006790	BP	GO:0006790	sulfur compound metabolic process	12/433	335/28943	0.0049096	0.0413687	0.028761	Sult1c2/Chac2/Slc7a11/Dcn/Ahcyl2/Chst7/Ggt5/Chst8/Dgat2/Acss1/Acot11/Gdap1l1	12
GO:0030501	BP	GO:0030501	positive regulation of bone mineralization	4/433	46/28943	0.00491018	0.0413687	0.028761	Gpm6b/Wnt4/Bmp4/Fam20c	4
GO:0060122	BP	GO:0060122	inner ear receptor cell stereocilium organization	4/433	46/28943	0.00491018	0.0413687	0.028761	Hes1/Pls1/Myo3b/Slc9a3r1	4
GO:0060322	BP	GO:0060322	head development	21/433	751/28943	0.00491752	0.0413687	0.028761	Atxn1/Scx/Six1/Ntf3/Hmga2/Zeb2/Hes1/Slc7a11/Phactr1/Adgrg1/Grhl2/Wnt4/Wnt7a/Crispld2/Git2/Wnt7b/Bmp4/Fgfr2/Crtac1/Dlx5/Ddit4	21
GO:0034767	BP	GO:0034767	positive regulation of ion transmembrane transport	9/433	213/28943	0.00499817	0.041904	0.0291332	Asic2/Iapp/Gpr39/Cftr/Ank3/Dpp6/Slc9a3r1/Bmp4/Tesc	9
GO:0035107	BP	GO:0035107	appendage morphogenesis	8/433	175/28943	0.00500451	0.041904	0.0291332	Msx2/Grhl2/Mycn/Wnt7a/Rdh10/Bmp4/Fgfr2/Dlx5	8
GO:0035108	BP	GO:0035108	limb morphogenesis	8/433	175/28943	0.00500451	0.041904	0.0291332	Msx2/Grhl2/Mycn/Wnt7a/Rdh10/Bmp4/Fgfr2/Dlx5	8
GO:0072080	BP	GO:0072080	nephron tubule development	6/433	105/28943	0.0050253	0.0420128	0.0292089	Six1/Hes1/Wnt4/Wnt7b/Bmp4/Tacstd2	6
GO:0034341	BP	GO:0034341	response to interferon-gamma	7/433	139/28943	0.00503825	0.0420557	0.0292387	Cd47/Casp1/Capg/Gch1/Gbp2b/Arg1/Stxbp2	7
GO:0010633	BP	GO:0010633	negative regulation of epithelial cell migration	5/433	74/28943	0.00506602	0.0420643	0.0292447	Klf4/Jup/Dcn/Card10/Tacstd2	5
GO:0060675	BP	GO:0060675	ureteric bud morphogenesis	5/433	74/28943	0.00506602	0.0420643	0.0292447	Six1/Hes1/Wnt4/Bmp4/Tacstd2	5
GO:0060761	BP	GO:0060761	negative regulation of response to cytokine stimulus	5/433	74/28943	0.00506602	0.0420643	0.0292447	Klf4/Adar/Padi2/Arg1/F2rl1	5
GO:0002252	BP	GO:0002252	immune effector process	23/433	852/28943	0.00507053	0.0420643	0.0292447	Cd47/Muc4/Chga/Ifne/Spon2/Ptpn22/Casp1/Nod1/Myb/Gadd45g/H60c/Anxa3/Pycard/Clu/Il20rb/Nfkbiz/Il33/Sftpd/Arg1/Ctsh/Il18r1/Stxbp2/F2rl1	23
GO:0010594	BP	GO:0010594	regulation of endothelial cell migration	8/433	176/28943	0.00517631	0.0428099	0.029763	Klf4/Jup/Wnt7a/Dcn/Anxa3/Bmp4/Srpx2/Card10	8
GO:0032635	BP	GO:0032635	interleukin-6 production	8/433	176/28943	0.00517631	0.0428099	0.029763	Cd47/Spon2/Ptpn22/Nod1/Mbp/Pycard/Il33/F2rl1	8
GO:0072091	BP	GO:0072091	regulation of stem cell proliferation	6/433	106/28943	0.00526126	0.0434041	0.0301761	Fermt1/Hmga2/Epcam/Bmp4/Fgfr2/Fbln1	6
GO:0001667	BP	GO:0001667	ameboidal-type cell migration	15/433	471/28943	0.00527839	0.0434041	0.0301761	Fermt1/Klf4/Zeb2/Jup/Wnt7a/Dcn/Anxa3/Slc9a3r1/Edn2/Bmp4/Gipc1/Srpx2/Ctsh/Card10/Tacstd2	15
GO:1901137	BP	GO:1901137	carbohydrate derivative biosynthetic process	18/433	611/28943	0.00529959	0.0434041	0.0301761	Galnt3/Cryl1/Fut9/Smpd3/Cytl1/Slc39a8/Gmds/Chst7/Slc35c1/Galnt7/Il33/Chst8/Ampd3/Slc25a13/Bace2/Acss1/St6galnac2/Atp5g1	18
GO:0031032	BP	GO:0031032	actomyosin structure organization	9/433	215/28943	0.00530687	0.0434041	0.0301761	Cd47/Phactr1/Krt19/Fam171a1/F11r/Wnt4/Krt8/Rhpn2/Tacstd2	9
GO:0031347	BP	GO:0031347	regulation of defense response	19/433	659/28943	0.00531353	0.0434041	0.0301761	Cd47/Pla2g4a/Ffar4/Ptpn22/Casp1/Adar/Nod1/Zbp1/C2cd4a/Pycard/Napepld/Il20rb/Nfkbiz/Il33/Htra1/Cxcl17/Ier3/Arg1/F2rl1	19
GO:0000305	BP	GO:0000305	response to oxygen radical	3/433	24/28943	0.00532877	0.0434041	0.0301761	Txnrd2/Gch1/Sod3	3
GO:0002710	BP	GO:0002710	negative regulation of T cell mediated immunity	3/433	24/28943	0.00532877	0.0434041	0.0301761	Muc4/Il20rb/Arg1	3
GO:0006691	BP	GO:0006691	leukotriene metabolic process	3/433	24/28943	0.00532877	0.0434041	0.0301761	Pla2g4a/Mgst3/Ggt5	3
GO:0019400	BP	GO:0019400	alditol metabolic process	3/433	24/28943	0.00532877	0.0434041	0.0301761	Pla2g4a/Mogat1/Dgat2	3
GO:0032352	BP	GO:0032352	positive regulation of hormone metabolic process	3/433	24/28943	0.00532877	0.0434041	0.0301761	Wnt4/Rdh10/Por	3
GO:2001242	BP	GO:2001242	regulation of intrinsic apoptotic signaling pathway	8/433	177/28943	0.00535258	0.0435322	0.0302652	Mdm4/Rnf183/Dapk2/Pycard/Vnn1/Clu/Slc9a3r1/Wfs1	8
GO:0048645	BP	GO:0048645	animal organ formation	5/433	75/28943	0.00536265	0.0435483	0.0302764	Six1/Hes1/Rdh10/Bmp4/Fgfr2	5
GO:0055123	BP	GO:0055123	digestive system development	7/433	141/28943	0.00544162	0.0439667	0.0305673	Cdh1/Hes1/Myb/Agr2/Pdgfa/Bmp4/Fgfr2	7
GO:1903844	BP	GO:1903844	regulation of cellular response to transforming growth factor beta stimulus	7/433	141/28943	0.00544162	0.0439667	0.0305673	Nrep/Fermt1/Zeb2/Ltbp1/Htra1/Gipc1/Pmepa1	7
GO:1904375	BP	GO:1904375	regulation of protein localization to cell periphery	7/433	141/28943	0.00544162	0.0439667	0.0305673	Cdh1/Ezr/Pls1/Dpp6/Agr2/Tmbim1/Camk2b	7
GO:0009914	BP	GO:0009914	hormone transport	13/433	383/28943	0.00544684	0.0439667	0.0305673	Dio2/Ffar4/Chga/Hmga2/Gpr39/Cftr/Smpd3/Cyb5r4/Inhbb/Rph3al/Trpv6/Edn2/Scg5	13
GO:0060993	BP	GO:0060993	kidney morphogenesis	6/433	107/28943	0.00550524	0.0443716	0.0308488	Six1/Hes1/Wnt4/Wnt7b/Bmp4/Tacstd2	6
GO:0010720	BP	GO:0010720	positive regulation of cell development	13/433	384/28943	0.0055636	0.0446489	0.0310416	Atxn1/Ntf3/Fmr1/Zeb2/Cftr/Hes1/Nedd9/F11r/Il33/Bmp4/Camk2b/Aspa/Atp5g1	13
GO:0072657	BP	GO:0072657	protein localization to membrane	18/433	614/28943	0.0055661	0.0446489	0.0310416	Tspan33/Cdh1/Pkp3/Ezr/Ank3/Slc7a11/Pls1/Dpp6/F11r/Jup/Rtp4/Pkp2/Agr2/Dok7/Slc9a3r1/Tmbim1/Camk2b/Tesc	18
GO:0045165	BP	GO:0045165	cell fate commitment	11/433	298/28943	0.00557282	0.0446489	0.0310416	Six1/Ntf3/Hes1/Esrp1/Wnt4/Wnt7a/Olig3/Wnt7b/Bmp4/Fgfr2/Tm2d3	11
GO:0046394	BP	GO:0046394	carboxylic acid biosynthetic process	11/433	298/28943	0.00557282	0.0446489	0.0310416	Pla2g4a/Bcat1/Slc27a2/Aldh1a1/Mgst3/Rdh10/Edn2/Ggt5/Alox12e/Acss1/Dhrs9	11
GO:0032677	BP	GO:0032677	regulation of interleukin-8 production	5/433	76/28943	0.00567134	0.0453034	0.0314966	Klf4/Ptpn22/Nod1/Pycard/F2rl1	5
GO:0046847	BP	GO:0046847	filopodium assembly	5/433	76/28943	0.00567134	0.0453034	0.0314966	Fgd3/Fmr1/Ezr/Myo10/Myo3b	5
GO:0002790	BP	GO:0002790	peptide secretion	11/433	299/28943	0.00571043	0.0454807	0.0316199	Dio2/Ffar4/Chga/Hmga2/Gpr39/Cftr/Smpd3/Cyb5r4/Inhbb/Rph3al/Mmp7	11
GO:0016053	BP	GO:0016053	organic acid biosynthetic process	11/433	299/28943	0.00571043	0.0454807	0.0316199	Pla2g4a/Bcat1/Slc27a2/Aldh1a1/Mgst3/Rdh10/Edn2/Ggt5/Alox12e/Acss1/Dhrs9	11
GO:0072348	BP	GO:0072348	sulfur compound transport	4/433	48/28943	0.00571972	0.0454874	0.0316245	Slc7a11/Slc9a3r1/Slc6a13/Lrrc8d	4
GO:0032755	BP	GO:0032755	positive regulation of interleukin-6 production	6/433	108/28943	0.00575738	0.0456966	0.03177	Spon2/Nod1/Mbp/Pycard/Il33/F2rl1	6
GO:0090257	BP	GO:0090257	regulation of muscle system process	10/433	258/28943	0.00577577	0.0456966	0.03177	Klf4/Chga/Jup/Dsc2/Dsp/Pkp2/Oxtr/Edn2/Adra2c/Dsg2	10
GO:0030326	BP	GO:0030326	embryonic limb morphogenesis	7/433	143/28943	0.00586872	0.0456966	0.03177	Msx2/Grhl2/Mycn/Wnt7a/Rdh10/Bmp4/Dlx5	7
GO:0035113	BP	GO:0035113	embryonic appendage morphogenesis	7/433	143/28943	0.00586872	0.0456966	0.03177	Msx2/Grhl2/Mycn/Wnt7a/Rdh10/Bmp4/Dlx5	7
GO:0035270	BP	GO:0035270	endocrine system development	7/433	143/28943	0.00586872	0.0456966	0.03177	Six1/Hmga2/Cftr/Hes1/Wnt4/Clu/Bmp4	7
GO:0006551	BP	GO:0006551	leucine metabolic process	2/433	8/28943	0.00589031	0.0456966	0.03177	Hmgcll1/Bcat1	2
GO:0032415	BP	GO:0032415	regulation of sodium:proton antiporter activity	2/433	8/28943	0.00589031	0.0456966	0.03177	Slc9a3r1/Tesc	2
GO:0034635	BP	GO:0034635	glutathione transport	2/433	8/28943	0.00589031	0.0456966	0.03177	Slc7a11/Slc9a3r1	2
GO:0042637	BP	GO:0042637	catagen	2/433	8/28943	0.00589031	0.0456966	0.03177	Msx2/Barx2	2
GO:0042939	BP	GO:0042939	tripeptide transport	2/433	8/28943	0.00589031	0.0456966	0.03177	Slc7a11/Slc9a3r1	2
GO:0060455	BP	GO:0060455	negative regulation of gastric acid secretion	2/433	8/28943	0.00589031	0.0456966	0.03177	Gpr39/Oxtr	2
GO:0061312	BP	GO:0061312	BMP signaling pathway involved in heart development	2/433	8/28943	0.00589031	0.0456966	0.03177	Msx2/Bmp4	2
GO:0061518	BP	GO:0061518	microglial cell proliferation	2/433	8/28943	0.00589031	0.0456966	0.03177	Clu/Il33	2
GO:0072050	BP	GO:0072050	S-shaped body morphogenesis	2/433	8/28943	0.00589031	0.0456966	0.03177	Hes1/Bmp4	2
GO:0072205	BP	GO:0072205	metanephric collecting duct development	2/433	8/28943	0.00589031	0.0456966	0.03177	Wnt7b/Bmp4	2
GO:1901388	BP	GO:1901388	regulation of transforming growth factor beta activation	2/433	8/28943	0.00589031	0.0456966	0.03177	Ltbp1/Itgb6	2
GO:1905331	BP	GO:1905331	negative regulation of morphogenesis of an epithelium	2/433	8/28943	0.00589031	0.0456966	0.03177	Bmp4/Tacstd2	2
GO:0008209	BP	GO:0008209	androgen metabolic process	3/433	25/28943	0.00598899	0.0461556	0.0320891	Wnt4/Hsd17b11/Dhrs9	3
GO:0043171	BP	GO:0043171	peptide catabolic process	3/433	25/28943	0.00598899	0.0461556	0.0320891	Chac2/Ggt5/Ctsh	3
GO:0072207	BP	GO:0072207	metanephric epithelium development	3/433	25/28943	0.00598899	0.0461556	0.0320891	Hes1/Wnt4/Wnt7b	3
GO:0090189	BP	GO:0090189	regulation of branching involved in ureteric bud morphogenesis	3/433	25/28943	0.00598899	0.0461556	0.0320891	Six1/Bmp4/Tacstd2	3
GO:0032637	BP	GO:0032637	interleukin-8 production	5/433	77/28943	0.00599234	0.0461556	0.0320891	Klf4/Ptpn22/Nod1/Pycard/F2rl1	5
GO:0000041	BP	GO:0000041	transition metal ion transport	6/433	109/28943	0.00601785	0.046161	0.0320929	Myo1b/Cp/Slc40a1/Slc39a8/Ltf/Timd2	6
GO:0048704	BP	GO:0048704	embryonic skeletal system morphogenesis	6/433	109/28943	0.00601785	0.046161	0.0320929	Six1/Grhl2/Mycn/Rdh10/Bmp4/Fgfr2	6
GO:0002521	BP	GO:0002521	leukocyte differentiation	19/433	667/28943	0.00601877	0.046161	0.0320929	Ifne/Iapp/Car2/L3mbtl3/Ptpn22/Wnt4/Itgb6/Fos/Myb/Gadd45g/Vnn1/Nfkbiz/Prxl2a/Bmp4/Tmem176b/Fam20c/Il18r1/Tesc/F2rl1	19
GO:0006520	BP	GO:0006520	cellular amino acid metabolic process	10/433	260/28943	0.00608774	0.0466236	0.0324145	Hmgcll1/Ddc/Slc7a11/Bcat1/Aldh1a1/Slc39a8/Dio1/Ggt5/Thap4/Arg1	10
GO:0010543	BP	GO:0010543	regulation of platelet activation	4/433	49/28943	0.0061559	0.0469453	0.0326381	Pla2g4a/F11r/Tec/Pdgfa	4
GO:0016601	BP	GO:0016601	Rac protein signal transduction	4/433	49/28943	0.0061559	0.0469453	0.0326381	Cadm4/Dynlt1b/Abi2/Eps8l2	4
GO:0044848	BP	GO:0044848	biological phase	4/433	49/28943	0.0061559	0.0469453	0.0326381	Fermt1/Msx2/Barx2/Topaz1	4
GO:0003002	BP	GO:0003002	regionalization	13/433	389/28943	0.00617777	0.0470454	0.0327078	Msx2/Six1/Zeb2/Grem2/Hes1/Adgrg1/Scmh1/Wnt7a/Bhlhe40/Pcsk6/Wnt7b/Bmp4/Fgfr2	13
GO:0050865	BP	GO:0050865	regulation of cell activation	22/433	817/28943	0.00622627	0.0473478	0.032918	Cd47/Pla2g4a/Vtcn1/Cftr/Hes1/Igfbp2/Ptpn22/F11r/Tec/Myb/Pycard/Pdgfa/Vnn1/Il20rb/Nfkbiz/Il33/Bmp4/Timd2/Sftpd/Arg1/Stxbp2/F2rl1	22
GO:0043547	BP	GO:0043547	positive regulation of GTPase activity	10/433	261/28943	0.00624857	0.0474503	0.0329892	Ntf3/Ngef/Dennd1a/Nedd9/Fzd10/F11r/Wnt4/Rapgefl1/Arhgap27/F2rl1	10
GO:0032642	BP	GO:0032642	regulation of chemokine production	6/433	110/28943	0.0062868	0.0476064	0.0330977	Klf4/Apod/Mbp/Pycard/Il33/F2rl1	6
GO:0046889	BP	GO:0046889	positive regulation of lipid biosynthetic process	6/433	110/28943	0.0062868	0.0476064	0.0330977	Pla2g4a/Smpd3/Wnt4/Rdh10/Dgat2/Por	6
GO:0042130	BP	GO:0042130	negative regulation of T cell proliferation	5/433	78/28943	0.00632592	0.0477682	0.0332103	Vtcn1/Il20rb/Bmp4/Sftpd/Arg1	5
GO:0072171	BP	GO:0072171	mesonephric tubule morphogenesis	5/433	78/28943	0.00632592	0.0477682	0.0332103	Six1/Hes1/Wnt4/Bmp4/Tacstd2	5
GO:0043269	BP	GO:0043269	regulation of ion transport	21/433	771/28943	0.00656407	0.0493612	0.0343178	Asic2/Pla2g4a/Gpm6b/Fmr1/Iapp/Car2/Gpr39/Cftr/Map2k6/Hes1/Ank3/Stc2/Dpp6/Cldn10/Ptpn22/Slc9a3r1/Oxtr/Bmp4/Wfs1/Arg1/Tesc	21
GO:0032760	BP	GO:0032760	positive regulation of tumor necrosis factor production	6/433	111/28943	0.00656438	0.0493612	0.0343178	Spon2/Nod1/Pycard/Clu/Il33/Cyp2j6	6
GO:0061326	BP	GO:0061326	renal tubule development	6/433	111/28943	0.00656438	0.0493612	0.0343178	Six1/Hes1/Wnt4/Wnt7b/Bmp4/Tacstd2	6
GO:0048732	BP	GO:0048732	gland development	15/433	483/28943	0.00659746	0.0495241	0.034431	Msx2/Six1/Cdh1/Hmga2/Hes1/Esrp1/Wnt4/Ctnnd1/Myb/Pdgfa/Slc9a3r1/Serpinb5/Bmp4/Fgfr2/Elf3	15
GO:0042088	BP	GO:0042088	T-helper 1 type immune response	4/433	50/28943	0.00661364	0.0495241	0.034431	Pla2g4a/Gadd45g/Il33/Il18r1	4
GO:0090102	BP	GO:0090102	cochlea development	4/433	50/28943	0.00661364	0.0495241	0.034431	Six1/Cdh1/Hes1/Myo3b	4
GO:0032703	BP	GO:0032703	negative regulation of interleukin-2 production	3/433	26/28943	0.00669596	0.0497942	0.0346188	Ezr/Il20rb/Sftpd	3
GO:0050927	BP	GO:0050927	positive regulation of positive chemotaxis	3/433	26/28943	0.00669596	0.0497942	0.0346188	Ntf3/Scg2/F2rl1	3
GO:0071880	BP	GO:0071880	adenylate cyclase-activating adrenergic receptor signaling pathway	3/433	26/28943	0.00669596	0.0497942	0.0346188	Arrdc3/Chga/Adra2c	3
GO:0090335	BP	GO:0090335	regulation of brown fat cell differentiation	3/433	26/28943	0.00669596	0.0497942	0.0346188	Ffar4/Six1/Napepld	3
GO:0097164	BP	GO:0097164	ammonium ion metabolic process	3/433	26/28943	0.00669596	0.0497942	0.0346188	Rnf180/Ddc/Gch1	3
GO:0070161	CC	GO:0070161	anchoring junction	35/438	666/28804	2.52972e-10	1.3281e-07	1.04384e-07	Fermt1/Cdh1/Cadm4/Ptpru/Pkp3/Igsf5/Ezr/Frmd4b/Ank3/Nedd9/Micall2/Cldn10/Abi2/Cldn2/F11r/Jup/Fndc1/Dsc2/Grhl2/Itgb6/Tec/Ctnnd1/Avil/Dsp/Epcam/Aoc1/Perp/Pkp2/Oxtr/Krt8/Gjb6/Gja3/Grb7/Cxadr/Dsg2	35
GO:0005911	CC	GO:0005911	cell-cell junction	30/438	530/28804	9.00172e-10	2.36295e-07	1.8572e-07	Cdh1/Cadm4/Ptpru/Pkp3/Igsf5/Ezr/Frmd4b/Ank3/Micall2/Cldn10/Abi2/Cldn2/F11r/Jup/Fndc1/Dsc2/Grhl2/Tec/Ctnnd1/Dsp/Epcam/Aoc1/Perp/Pkp2/Oxtr/Krt8/Gjb6/Gja3/Cxadr/Dsg2	30
GO:0098858	CC	GO:0098858	actin-based cell projection	18/438	229/28804	1.67364e-08	2.92888e-06	2.30199e-06	Muc4/Myo1b/Fmr1/Ezr/Car2/Cftr/Pls1/Abi2/Myo10/Myo3b/Myo1d/Pdgfa/Slc9a3r1/Oxtr/Slc34a2/Clca1/Eps8l2/Cxadr	18
GO:0005902	CC	GO:0005902	microvillus	11/438	105/28804	6.13216e-07	8.04846e-05	6.32581e-05	Muc4/Myo1b/Ezr/Car2/Cftr/Myo1d/Pdgfa/Slc9a3r1/Oxtr/Slc34a2/Clca1	11
GO:0030057	CC	GO:0030057	desmosome	6/438	24/28804	1.27496e-06	0.00013387	0.000105217	Pkp3/Jup/Dsc2/Dsp/Pkp2/Dsg2	6
GO:0031012	CC	GO:0031012	extracellular matrix	24/438	525/28804	2.10454e-06	0.000147454	0.000115893	Egfl6/Muc4/Ltbp1/Spon2/Lama3/Wnt4/Wnt7a/Crispld2/Dcn/Mmp7/Lrig1/Pcsk6/Anxa3/Pcolce2/Sod3/Lamb3/Fgfr2/Fcgbp/Htra1/Sftpd/Lamc2/Fbln1/Srpx2/Col6a4	24
GO:0005903	CC	GO:0005903	brush border	12/438	144/28804	2.23514e-06	0.000147454	0.000115893	Myo1b/Ezr/Slc7a11/Plb1/Pls1/Trpm6/Myo1d/Slc9a3r1/Slc34a2/Kcnk1/Gipc1/Slc28a3	12
GO:0030312	CC	GO:0030312	external encapsulating structure	24/438	527/28804	2.24691e-06	0.000147454	0.000115893	Egfl6/Muc4/Ltbp1/Spon2/Lama3/Wnt4/Wnt7a/Crispld2/Dcn/Mmp7/Lrig1/Pcsk6/Anxa3/Pcolce2/Sod3/Lamb3/Fgfr2/Fcgbp/Htra1/Sftpd/Lamc2/Fbln1/Srpx2/Col6a4	24
GO:0098862	CC	GO:0098862	cluster of actin-based cell projections	14/438	205/28804	3.47888e-06	0.000202935	0.0001595	Myo1b/Ezr/Slc7a11/Plb1/Pls1/Trpm6/Myo3b/Myo1d/Slc9a3r1/Slc34a2/Kcnk1/Eps8l2/Gipc1/Slc28a3	14
GO:0099503	CC	GO:0099503	secretory vesicle	26/438	644/28804	7.50938e-06	0.000394242	0.000309861	Pam/Pla2g4a/Chga/Ntf3/Ddc/Dynlt1b/Myo5c/Slc40a1/Ebag9/Ltf/Mal2/Rph3al/Cyb561/Scg2/Anxa3/Chgb/Clca1/Wfs1/Gipc1/Rnpep/Bace2/Scg5/Ctsh/Cxadr/Tmprss4/Stxbp2	26
GO:0043296	CC	GO:0043296	apical junction complex	12/438	167/28804	1.03341e-05	0.000479527	0.000376891	Cdh1/Igsf5/Frmd4b/Ank3/Micall2/Cldn10/Cldn2/F11r/Ctnnd1/Epcam/Aoc1/Cxadr	12
GO:0005912	CC	GO:0005912	adherens junction	11/438	142/28804	1.1874e-05	0.000479527	0.000376891	Cdh1/Pkp3/Ezr/Frmd4b/Abi2/Jup/Dsc2/Ctnnd1/Pkp2/Oxtr/Cxadr	11
GO:0005923	CC	GO:0005923	bicellular tight junction	11/438	142/28804	1.1874e-05	0.000479527	0.000376891	Igsf5/Frmd4b/Ank3/Micall2/Cldn10/Cldn2/F11r/Ctnnd1/Epcam/Aoc1/Cxadr	11
GO:0005610	CC	GO:0005610	laminin-5 complex	3/438	4/28804	1.38115e-05	0.000517932	0.000407076	Lama3/Lamb3/Lamc2	3
GO:0030141	CC	GO:0030141	secretory granule	20/438	440/28804	1.6118e-05	0.000547793	0.000430546	Pam/Pla2g4a/Chga/Myo5c/Ebag9/Ltf/Rph3al/Cyb561/Scg2/Anxa3/Chgb/Clca1/Wfs1/Rnpep/Bace2/Scg5/Ctsh/Cxadr/Tmprss4/Stxbp2	20
GO:0045178	CC	GO:0045178	basal part of cell	16/438	300/28804	1.66946e-05	0.000547793	0.000430546	Cdh1/Ezr/Car2/Cftr/Ank3/Itga9/Slc40a1/Slc39a8/Nod1/Dsp/Epcam/Myo1d/Slc6a13/Krt14/Cxadr/Tacstd2	16
GO:0045177	CC	GO:0045177	apical part of cell	21/438	488/28804	2.24086e-05	0.000649782	0.000510706	Muc4/Cdh1/Myo1b/Ezr/Exoc1/Car2/Cftr/Slc7a11/Trpm6/Igfbp2/Plet1/Slc39a8/Slc15a2/Epcam/Slc9a3r1/Oxtr/Slc34a2/Kcnk1/Gjb6/Dsg2/Stxbp2	21
GO:0070160	CC	GO:0070160	tight junction	11/438	152/28804	2.25175e-05	0.000649782	0.000510706	Igsf5/Frmd4b/Ank3/Micall2/Cldn10/Cldn2/F11r/Ctnnd1/Epcam/Aoc1/Cxadr	11
GO:0009925	CC	GO:0009925	basal plasma membrane	15/438	275/28804	2.35159e-05	0.000649782	0.000510706	Cdh1/Ezr/Car2/Cftr/Ank3/Itga9/Slc40a1/Slc39a8/Nod1/Dsp/Epcam/Myo1d/Slc6a13/Cxadr/Tacstd2	15
GO:0016327	CC	GO:0016327	apicolateral plasma membrane	5/438	25/28804	3.28463e-05	0.000862214	0.00067767	Krt19/Jup/Ctnnd1/Krt8/Cxadr	5
GO:0001533	CC	GO:0001533	cornified envelope	7/438	61/28804	3.85212e-05	0.00096303	0.000756908	Pkp3/Jup/Dsp/Serpinb5/Krt5/Krt14/Sprr1a	7
GO:0016324	CC	GO:0016324	apical plasma membrane	17/438	370/28804	6.04218e-05	0.00143979	0.00113162	Muc4/Ezr/Exoc1/Cftr/Trpm6/Igfbp2/Plet1/Slc39a8/Slc15a2/Epcam/Slc9a3r1/Oxtr/Slc34a2/Kcnk1/Gjb6/Dsg2/Stxbp2	17
GO:0048471	CC	GO:0048471	perinuclear region of cytoplasm	25/438	691/28804	6.7604e-05	0.00143979	0.00113162	Galnt3/Pam/Pla2g4a/Chga/Cdh1/Myo1b/Hmgcll1/Dync1i1/Fmr1/Ezr/Ltbp1/Stc2/Ptpn22/Cyb5r4/Inhbb/Wwc1/Apod/Clu/Slc9a3r1/Slk/Gbp2b/Lamc2/Gdpd1/Dgat2/Mlph	25
GO:0044291	CC	GO:0044291	cell-cell contact zone	8/438	90/28804	6.99945e-05	0.00143979	0.00113162	Cadm4/Ank3/Jup/Dsc2/Dsp/Pkp2/Cxadr/Dsg2	8
GO:0014704	CC	GO:0014704	intercalated disc	7/438	67/28804	7.10096e-05	0.00143979	0.00113162	Ank3/Jup/Dsc2/Dsp/Pkp2/Cxadr/Dsg2	7
GO:0043025	CC	GO:0043025	neuronal cell body	26/438	736/28804	7.16201e-05	0.00143979	0.00113162	Asic2/Pam/Grik4/Fmr1/Ddc/Cftr/Ltbp1/Dynlt1b/Dennd1a/Alcam/Dlgap4/Dpp6/Txnrd2/Rgs12/Klhl14/Myo10/Apod/Ckmt1/Mbp/Myo1d/Anxa3/Pycard/Adra2c/Arg1/Camk2b/Atp5g1	26
GO:0044297	CC	GO:0044297	cell body	28/438	824/28804	7.40461e-05	0.00143979	0.00113162	Asic2/Pam/Grik4/Fmr1/Ezr/Ddc/Cftr/Ltbp1/Dynlt1b/Dennd1a/Alcam/Dlgap4/Dpp6/Txnrd2/Rgs12/Klhl14/Myo10/Apod/Ckmt1/Mbp/Myo1d/Anxa3/Pycard/Adra2c/Arg1/Camk2b/Atp5g1/Cxadr	28
GO:0016323	CC	GO:0016323	basolateral plasma membrane	13/438	246/28804	0.000111854	0.00209727	0.00164838	Cdh1/Ezr/Car2/Cftr/Ank3/Slc40a1/Slc39a8/Nod1/Dsp/Epcam/Myo1d/Slc6a13/Cxadr	13
GO:0015629	CC	GO:0015629	actin cytoskeleton	20/438	511/28804	0.000127715	0.00231208	0.00181721	Cdh1/Dctn6/Myo1b/Ezr/Barx2/Myo5c/Pls1/Krt19/Micall2/Abi2/Jup/Klhl14/Myo10/Avil/Capg/Myo3b/Myo1d/Llgl2/Gjb6/Mlph	20
GO:0062023	CC	GO:0062023	collagen-containing extracellular matrix	17/438	396/28804	0.000137337	0.0024034	0.00188899	Egfl6/Muc4/Ltbp1/Lama3/Dcn/Pcsk6/Anxa3/Pcolce2/Sod3/Lamb3/Fgfr2/Htra1/Sftpd/Lamc2/Fbln1/Srpx2/Col6a4	17
GO:0031526	CC	GO:0031526	brush border membrane	7/438	79/28804	0.000202478	0.00342906	0.00269512	Slc7a11/Plb1/Trpm6/Slc9a3r1/Slc34a2/Kcnk1/Slc28a3	7
GO:0031528	CC	GO:0031528	microvillus membrane	4/438	23/28804	0.000371329	0.00609212	0.00478819	Muc4/Ezr/Slc9a3r1/Slc34a2	4
GO:0030424	CC	GO:0030424	axon	24/438	737/28804	0.000442166	0.00703446	0.00552884	Smim31/Grik4/Cdh1/Ntf3/Dync1i1/Fmr1/Ddc/Car2/Ank3/Dynlt1b/Alcam/Txnrd2/Aldh1a1/Ctnnd1/Mbp/Scgn/Myo1d/Anxa3/Git2/Clu/Adra2c/Crtac1/Atp5g1/Cxadr	24
GO:0016328	CC	GO:0016328	lateral plasma membrane	6/438	67/28804	0.000544915	0.00841412	0.0066132	Cdh1/Ank3/Jup/Epcam/Dsg2/Tacstd2	6
GO:0031252	CC	GO:0031252	cell leading edge	16/438	409/28804	0.00059349	0.00890236	0.00699694	Cdh1/Cadm4/Ezr/Frmd4b/Dynlt1b/Abi2/Myo10/Ctnnd1/Avil/Wwc1/Myo1d/Slk/Sh3yl1/Eps8l2/Tesc/Stxbp2	16
GO:0098592	CC	GO:0098592	cytoplasmic side of apical plasma membrane	2/438	3/28804	0.000685143	0.00984267	0.00773599	Ezr/Exoc1	2
GO:0043256	CC	GO:0043256	laminin complex	3/438	12/28804	0.000693674	0.00984267	0.00773599	Lama3/Lamb3/Lamc2	3
GO:0030175	CC	GO:0030175	filopodium	7/438	99/28804	0.00080236	0.0110852	0.00871261	Myo1b/Fmr1/Ezr/Abi2/Myo10/Myo3b/Cxadr	7
GO:0031253	CC	GO:0031253	cell projection membrane	13/438	320/28804	0.00134866	0.0177577	0.013957	Muc4/Ezr/Slc7a11/Plb1/Trpm6/Wwc1/Myo1d/Slc9a3r1/Slc34a2/Sh3yl1/Kcnk1/Eps8l2/Slc28a3	13
GO:1990357	CC	GO:1990357	terminal web	2/438	4/28804	0.00135647	0.0177577	0.013957	Pls1/Krt19	2
GO:0042581	CC	GO:0042581	specific granule	3/438	15/28804	0.0013868	0.0177577	0.013957	Ltf/Anxa3/Stxbp2	3
GO:0016459	CC	GO:0016459	myosin complex	5/438	56/28804	0.00160523	0.0200653	0.0157707	Myo1b/Myo10/Myo3b/Myo1d/Mlph	5
GO:0012506	CC	GO:0012506	vesicle membrane	20/438	629/28804	0.0017141	0.0209279	0.0164486	Pam/Ffar4/Myo1b/Cftr/Sec16b/Dennd1a/Atp10b/Mal2/Rph3al/Cyb561/Anxa3/Clint1/Ap1m2/Atp13a4/Tmbim1/Clca1/Wfs1/Gipc1/Pmepa1/Stxbp2	20
GO:0005788	CC	GO:0005788	endoplasmic reticulum lumen	6/438	85/28804	0.00190006	0.0226712	0.0178187	Ntf3/Slc27a2/Wnt4/Wnt7a/Wnt7b/Clu	6
GO:0072558	CC	GO:0072558	NLRP1 inflammasome complex	2/438	5/28804	0.00223803	0.0255428	0.0200757	Casp1/Pycard	2
GO:0097169	CC	GO:0097169	AIM2 inflammasome complex	2/438	5/28804	0.00223803	0.0255428	0.0200757	Casp1/Pycard	2
GO:0032433	CC	GO:0032433	filopodium tip	3/438	18/28804	0.00240433	0.0267051	0.0209893	Fmr1/Abi2/Myo3b	3
GO:0030659	CC	GO:0030659	cytoplasmic vesicle membrane	19/438	604/28804	0.00249171	0.0267051	0.0209893	Pam/Ffar4/Myo1b/Cftr/Sec16b/Dennd1a/Atp10b/Mal2/Rph3al/Cyb561/Anxa3/Clint1/Ap1m2/Atp13a4/Tmbim1/Clca1/Wfs1/Pmepa1/Stxbp2	19
GO:0030425	CC	GO:0030425	dendrite	22/438	743/28804	0.00249248	0.0267051	0.0209893	Asic2/Grik4/Ntf3/Fmr1/Cftr/Ank3/Ltbp1/Dennd1a/Dlgap4/Txnrd2/Abi2/Rgs12/Ctnnd1/Apod/Scgn/Myo1d/Anxa3/Clu/Gipc1/Camk2b/Mlph/Tmem266	22
GO:0097447	CC	GO:0097447	dendritic tree	22/438	746/28804	0.00261635	0.0274717	0.0215918	Asic2/Grik4/Ntf3/Fmr1/Cftr/Ank3/Ltbp1/Dennd1a/Dlgap4/Txnrd2/Abi2/Rgs12/Ctnnd1/Apod/Scgn/Myo1d/Anxa3/Clu/Gipc1/Camk2b/Mlph/Tmem266	22
GO:0016010	CC	GO:0016010	dystrophin-associated glycoprotein complex	3/438	20/28804	0.00328419	0.0335525	0.0263711	Krt19/Sgcg/Krt8	3
GO:0042583	CC	GO:0042583	chromaffin granule	2/438	6/28804	0.0033233	0.0335525	0.0263711	Chga/Cyb561	2
GO:0031225	CC	GO:0031225	anchored component of membrane	9/438	198/28804	0.00345261	0.0342004	0.0268803	Lypd6b/Vtcn1/Cp/Plet1/Nod1/Ly6h/Cpm/H60c/Vnn1	9
GO:0032426	CC	GO:0032426	stereocilium tip	3/438	21/28804	0.00378871	0.0368347	0.0289508	Myo3b/Slc9a3r1/Eps8l2	3
GO:0097386	CC	GO:0097386	glial cell projection	4/438	43/28804	0.00407456	0.0388936	0.030569	Fmr1/Ezr/Slc7a11/Adgrg1	4
GO:0097449	CC	GO:0097449	astrocyte projection	3/438	22/28804	0.00433791	0.0406679	0.0319635	Ezr/Slc7a11/Adgrg1	3
GO:0005768	CC	GO:0005768	endosome	26/438	982/28804	0.00474307	0.0436862	0.0343358	Arrdc3/Ffar4/Cdh1/Myo1b/Dync1i1/Ezr/Steap1/Osbpl9/Cftr/Atp10b/Snx7/Micall2/Ltf/Rnf128/Myo1d/Clint1/Napepld/Atp13a4/Tmbim1/Kcnk1/Pmepa1/Sftpd/Arhgap27/Bace2/Mib2/F2rl1	26
GO:0098797	CC	GO:0098797	plasma membrane protein complex	18/438	597/28804	0.00494469	0.044758	0.0351782	Grik4/Cdh1/Itga9/Alcam/Krt19/Dpp6/Jup/Itgb6/Ctnnd1/Sgcg/Slc9a3r1/Kcnk1/Krt8/Noxa1/Gjb6/Gja3/Il18r1/Chrnb1	18
GO:0030027	CC	GO:0030027	lamellipodium	8/438	175/28804	0.00550576	0.0489919	0.0385059	Cdh1/Dynlt1b/Abi2/Myo10/Ctnnd1/Avil/Tesc/Stxbp2	8
GO:0005882	CC	GO:0005882	intermediate filament	7/438	140/28804	0.00571104	0.0499716	0.0392759	Krt19/Jup/Dsp/Pkp2/Krt8/Krt5/Krt14	7
GO:0050839	MF	GO:0050839	cell adhesion molecule binding	20/429	308/28404	5.92259e-08	5.45466e-05	3.88149e-05	Cd47/Egfl6/Fermt1/Cdh1/Pkp3/Ezr/Ank3/Itga9/Tspan8/F11r/Jup/Lama3/Itgb6/Ctnnd1/Dsp/Epcam/Pkp2/Fbln1/Cxadr/Dsg2	20
GO:0019904	MF	GO:0019904	protein domain specific binding	34/429	826/28404	1.58652e-07	5.45466e-05	3.88149e-05	Cdh1/Hmga2/Fmr1/Igsf5/Ezr/Ddc/Cftr/Hes1/Dennd1a/Dlgap4/Abi2/Ptpn22/F11r/Casp1/Ctnnd1/Capg/Nod1/Bhlhe40/Rph3al/Myb/Srrm2/Myo1d/Pycard/Slc9a3r1/Slc34a2/Noxa1/Gipc1/Pmepa1/Llgl2/Blnk/Dlx5/Arhgap27/Cxadr/Card10	34
GO:0004745	MF	GO:0004745	NAD-retinol dehydrogenase activity	7/429	29/28404	1.99998e-07	5.45466e-05	3.88149e-05	Akr1c14/Akr1c12/Akr1c19/Akr1c13/Rdh10/Adh1/Dhrs9	7
GO:0008289	MF	GO:0008289	lipid binding	34/429	843/28404	2.54311e-07	5.45466e-05	3.88149e-05	Pla2g4a/Ffar4/Cpne8/Myo1b/Exoc1/Osbpl9/Dennd1a/Sdcbp2/Spon2/Snx7/Smpd3/Myo10/Ltf/Tec/Avil/Capg/Apod/Apol7a/Plek2/Anxa3/Clint1/Dok7/Vnn1/Sh3yl1/Esyt3/Timd2/Sftpd/Pla2g7/Faah/Tex2/Atp5g1/Grb7/Pla2g2e/Acot11	34
GO:0004620	MF	GO:0004620	phospholipase activity	11/429	98/28404	2.83212e-07	5.45466e-05	3.88149e-05	Plch2/Pla2g4a/Plcd3/Plb1/Smpd3/Plch1/Smpdl3a/Napepld/Gdpd1/Pla2g7/Pla2g2e	11
GO:0016298	MF	GO:0016298	lipase activity	12/429	123/28404	3.84027e-07	6.16363e-05	4.38599e-05	Plch2/Pla2g4a/Plcd3/Plb1/Smpd3/Plch1/Smpdl3a/Napepld/Gdpd1/Pla2g7/Faah/Pla2g2e	12
GO:0005543	MF	GO:0005543	phospholipid binding	23/429	460/28404	6.72025e-07	9.24515e-05	6.57877e-05	Pla2g4a/Cpne8/Myo1b/Exoc1/Dennd1a/Sdcbp2/Snx7/Smpd3/Myo10/Avil/Capg/Plek2/Anxa3/Clint1/Dok7/Vnn1/Sh3yl1/Esyt3/Timd2/Pla2g7/Faah/Grb7/Pla2g2e	23
GO:0016491	MF	GO:0016491	oxidoreductase activity	31/429	795/28404	1.76182e-06	0.00021208	0.000150914	Dio2/Pam/Egln3/Cryl1/Steap1/Akr1c14/Me1/Cp/Cbr2/Txnrd2/Akr1c12/Aldh1a1/Cyb5r4/Akr1c19/Akr1c13/Mgst3/Cyb561/Rdh10/Aoc1/Kdm3a/Sod3/Dio1/Adh1/Uox/Hsd17b11/Cyp2j6/Alox12e/Dhrs9/Upk3bl/Sdr42e1/Por	31
GO:0032052	MF	GO:0032052	bile acid binding	5/429	15/28404	2.03539e-06	0.000217787	0.000154975	Akr1c14/Akr1c12/Akr1c19/Akr1c13/Napepld	5
GO:0016616	MF	GO:0016616	oxidoreductase activity, acting on the CH-OH group of donors, NAD or NADP as acceptor	12/429	153/28404	3.92396e-06	0.000344931	0.00024545	Cryl1/Akr1c14/Me1/Cbr2/Akr1c12/Akr1c19/Akr1c13/Rdh10/Adh1/Hsd17b11/Dhrs9/Sdr42e1	12
GO:0033764	MF	GO:0033764	steroid dehydrogenase activity, acting on the CH-OH group of donors, NAD or NADP as acceptor	7/429	44/28404	4.03938e-06	0.000344931	0.00024545	Akr1c14/Akr1c12/Akr1c19/Akr1c13/Hsd17b11/Dhrs9/Sdr42e1	7
GO:0001758	MF	GO:0001758	retinal dehydrogenase activity	5/429	18/28404	5.59397e-06	0.000344931	0.00024545	Akr1c14/Akr1c12/Aldh1a1/Akr1c19/Akr1c13	5
GO:0047023	MF	GO:0047023	androsterone dehydrogenase activity	5/429	18/28404	5.59397e-06	0.000344931	0.00024545	Akr1c14/Akr1c12/Akr1c19/Akr1c13/Dhrs9	5
GO:0018636	MF	GO:0018636	phenanthrene 9,10-monooxygenase activity	4/429	9/28404	6.08912e-06	0.000344931	0.00024545	Akr1c14/Akr1c12/Akr1c19/Akr1c13	4
GO:0045703	MF	GO:0045703	ketoreductase activity	4/429	9/28404	6.08912e-06	0.000344931	0.00024545	Akr1c14/Akr1c12/Akr1c19/Akr1c13	4
GO:0047042	MF	GO:0047042	androsterone dehydrogenase (B-specific) activity	4/429	9/28404	6.08912e-06	0.000344931	0.00024545	Akr1c14/Akr1c12/Akr1c19/Akr1c13	4
GO:0047743	MF	GO:0047743	chlordecone reductase activity	4/429	9/28404	6.08912e-06	0.000344931	0.00024545	Akr1c14/Akr1c12/Akr1c19/Akr1c13	4
GO:0016614	MF	GO:0016614	oxidoreductase activity, acting on CH-OH group of donors	12/429	161/28404	6.63934e-06	0.000355205	0.000252761	Cryl1/Akr1c14/Me1/Cbr2/Akr1c12/Akr1c19/Akr1c13/Rdh10/Adh1/Hsd17b11/Dhrs9/Sdr42e1	12
GO:0016229	MF	GO:0016229	steroid dehydrogenase activity	7/429	50/28404	9.73934e-06	0.00041984	0.000298755	Akr1c14/Akr1c12/Akr1c19/Akr1c13/Hsd17b11/Dhrs9/Sdr42e1	7
GO:0047020	MF	GO:0047020	15-hydroxyprostaglandin-D dehydrogenase (NADP+) activity	4/429	10/28404	1.00273e-05	0.00041984	0.000298755	Akr1c14/Akr1c12/Akr1c19/Akr1c13	4
GO:0047086	MF	GO:0047086	ketosteroid monooxygenase activity	4/429	10/28404	1.00273e-05	0.00041984	0.000298755	Akr1c14/Akr1c12/Akr1c19/Akr1c13	4
GO:0047115	MF	GO:0047115	trans-1,2-dihydrobenzene-1,2-diol dehydrogenase activity	4/429	10/28404	1.00273e-05	0.00041984	0.000298755	Akr1c14/Akr1c12/Akr1c19/Akr1c13	4
GO:0047787	MF	GO:0047787	delta4-3-oxosteroid 5beta-reductase activity	4/429	10/28404	1.00273e-05	0.00041984	0.000298755	Akr1c14/Akr1c12/Akr1c19/Akr1c13	4
GO:0035410	MF	GO:0035410	dihydrotestosterone 17-beta-dehydrogenase activity	4/429	11/28404	1.55691e-05	0.000602291	0.000428585	Akr1c14/Akr1c12/Akr1c19/Akr1c13	4
GO:0005509	MF	GO:0005509	calcium ion binding	25/429	636/28404	1.56358e-05	0.000602291	0.000428585	Plch2/Galnt3/Egfl6/Pam/Pla2g4a/Cdh1/Capsl/Ltbp1/Pls1/Plch1/Dsc2/Gch1/Aoc1/Scgn/Padi2/Anxa3/Crtac1/Esyt3/Fam20c/Slc25a13/Fbln1/Dsg2/Tesc/Pla2g2e/Calml3	25
GO:0035091	MF	GO:0035091	phosphatidylinositol binding	15/429	272/28404	1.90974e-05	0.000707339	0.000503337	Pla2g4a/Myo1b/Exoc1/Dennd1a/Sdcbp2/Snx7/Myo10/Avil/Capg/Plek2/Dok7/Vnn1/Sh3yl1/Esyt3/Grb7	15
GO:0045294	MF	GO:0045294	alpha-catenin binding	4/429	12/28404	2.3075e-05	0.000793617	0.000564731	Cdh1/Pkp3/Jup/Pkp2	4
GO:0045550	MF	GO:0045550	geranylgeranyl reductase activity	4/429	12/28404	2.3075e-05	0.000793617	0.000564731	Akr1c14/Akr1c12/Akr1c19/Akr1c13	4
GO:0005198	MF	GO:0005198	structural molecule activity	24/429	616/28404	2.66195e-05	0.000883951	0.000629012	Rps24/Mall/Ank3/Ltbp1/Krt19/Cldn10/Cldn2/Jup/Lama3/Mal2/Dcn/Dsp/Mbp/Pcolce2/Lamb3/Krt8/Lamc2/Fbln1/Krt5/Srpx2/Krt14/Camk2b/Col6a4/Sprr1a	24
GO:0035671	MF	GO:0035671	enone reductase activity	4/429	13/28404	3.29331e-05	0.00103915	0.00073945	Akr1c14/Akr1c12/Akr1c19/Akr1c13	4
GO:0003958	MF	GO:0003958	NADPH-hemoprotein reductase activity	3/429	5/28404	3.34513e-05	0.00103915	0.00073945	Cyb5r4/Cyp2j6/Por	3
GO:0008081	MF	GO:0008081	phosphoric diester hydrolase activity	8/429	86/28404	4.81333e-05	0.00144851	0.00103075	Plch2/Plcd3/Pde7b/Smpd3/Plch1/Smpdl3a/Napepld/Gdpd1	8
GO:0008201	MF	GO:0008201	heparin binding	11/429	170/28404	5.91747e-05	0.00172683	0.0012288	Grem2/Adgrg1/Ltf/Crispld2/Mmp7/Aoc1/Pcsk6/Pcolce2/Bmp4/Fgfr2/Lamc2	11
GO:0045296	MF	GO:0045296	cadherin binding	7/429	69/28404	8.22421e-05	0.00232939	0.00165757	Cdh1/Pkp3/Ank3/Jup/Ctnnd1/Epcam/Pkp2	7
GO:0008106	MF	GO:0008106	alcohol dehydrogenase (NADP+) activity	5/429	33/28404	0.000128589	0.00353802	0.00251763	Akr1c14/Akr1c12/Akr1c19/Akr1c13/Rdh10	5
GO:0008233	MF	GO:0008233	peptidase activity	23/429	641/28404	0.000133721	0.00357704	0.00254539	Unc5cl/Sec11c/Dpp6/Prss23/Casp1/Tmprss11e/Ltf/Adam28/Mmp7/Cpm/Pcsk6/Pycard/Tmprss11b/Clca1/Ggt5/Htra1/Usp43/Rnpep/Rhbdl2/Bace2/Ctsh/Tmprss4/Pepd	23
GO:0016651	MF	GO:0016651	oxidoreductase activity, acting on NAD(P)H	7/429	75/28404	0.000140011	0.00364408	0.0025931	Akr1c14/Akr1c12/Cyb5r4/Akr1c19/Akr1c13/Cyp2j6/Por	7
GO:0051015	MF	GO:0051015	actin filament binding	12/429	222/28404	0.000154907	0.00392567	0.00279348	Fermt1/Myo1b/Ezr/Myo5c/Pls1/Micall2/Myo10/Avil/Capg/Myo1d/Eps8l2/Gjb6	12
GO:0042803	MF	GO:0042803	protein homodimerization activity	26/429	791/28404	0.000200789	0.00495793	0.00352803	Cryl1/Fmr1/Mid1/Hes1/Stc2/Zbtb38/Sdcbp2/Txnrd2/F11r/Inhbb/Nod1/Bhlhe40/Fibin/Gch1/Aoc1/Padi2/Pycard/Pdgfa/Adra2c/Slk/Fgfr2/Gbp2b/Dgat2/Camk2b/Tmem266/Tesc	26
GO:0000146	MF	GO:0000146	microfilament motor activity	5/429	37/28404	0.000224748	0.00521836	0.00371335	Myo1b/Myo5c/Myo10/Myo3b/Myo1d	5
GO:0004033	MF	GO:0004033	aldo-keto reductase (NADP) activity	5/429	37/28404	0.000224748	0.00521836	0.00371335	Akr1c14/Akr1c12/Akr1c19/Akr1c13/Rdh10	5
GO:0003692	MF	GO:0003692	left-handed Z-DNA binding	2/429	2/28404	0.000227592	0.00521836	0.00371335	Adar/Zbp1	2
GO:0005539	MF	GO:0005539	glycosaminoglycan binding	12/429	233/28404	0.000242196	0.00542407	0.00385973	Grem2/Adgrg1/Ltf/Crispld2/Dcn/Mmp7/Aoc1/Pcsk6/Pcolce2/Bmp4/Fgfr2/Lamc2	12
GO:0004032	MF	GO:0004032	alditol:NADP+ 1-oxidoreductase activity	4/429	21/28404	0.000250496	0.00548244	0.00390126	Akr1c14/Akr1c12/Akr1c19/Akr1c13	4
GO:0019911	MF	GO:0019911	structural constituent of myelin sheath	3/429	10/28404	0.000379403	0.00794271	0.00565197	Mall/Mal2/Mbp	3
GO:0047499	MF	GO:0047499	calcium-independent phospholipase A2 activity	3/429	10/28404	0.000379403	0.00794271	0.00565197	Pla2g4a/Plb1/Pla2g7	3
GO:0008236	MF	GO:0008236	serine-type peptidase activity	11/429	211/28404	0.000392937	0.00805103	0.00572905	Sec11c/Dpp6/Prss23/Tmprss11e/Ltf/Pcsk6/Tmprss11b/Htra1/Rhbdl2/Ctsh/Tmprss4	11
GO:0017171	MF	GO:0017171	serine hydrolase activity	11/429	216/28404	0.000478546	0.00941958	0.0067029	Sec11c/Dpp6/Prss23/Tmprss11e/Ltf/Pcsk6/Tmprss11b/Htra1/Rhbdl2/Ctsh/Tmprss4	11
GO:0005201	MF	GO:0005201	extracellular matrix structural constituent	9/429	150/28404	0.000479293	0.00941958	0.0067029	Ltbp1/Lama3/Dcn/Pcolce2/Lamb3/Lamc2/Fbln1/Srpx2/Col6a4	9
GO:0003779	MF	GO:0003779	actin binding	17/429	447/28404	0.000514452	0.00974028	0.0069311	Fermt1/Myo1b/Ezr/Myo5c/Pls1/Phactr1/Micall2/Myo10/Avil/Capg/Myo3b/Myo1d/Eps8l2/Gipc1/Gjb6/Mib2/Mlph	17
GO:0016653	MF	GO:0016653	oxidoreductase activity, acting on NAD(P)H, heme protein as acceptor	3/429	11/28404	0.00051584	0.00974028	0.0069311	Cyb5r4/Cyp2j6/Por	3
GO:0015318	MF	GO:0015318	inorganic molecular entity transmembrane transporter activity	23/429	707/28404	0.000533018	0.00987109	0.00702419	Asic2/Grik4/Cftr/Ano4/Trpm6/Slc40a1/Slc39a8/Slc15a2/Trpv6/Apol7a/Slc14a1/Slc34a2/Slc6a13/Atp13a4/Clca1/Kcnk1/Slc28a3/Gabrp/Lrrc8d/Atp5g1/Slc5a9/Chrnb1/Tmem266	23
GO:0005178	MF	GO:0005178	integrin binding	9/429	155/28404	0.000607704	0.0110419	0.00785731	Egfl6/Fermt1/Itga9/Tspan8/F11r/Lama3/Itgb6/Fbln1/Cxadr	9
GO:0046914	MF	GO:0046914	transition metal ion binding	29/429	995/28404	0.000631394	0.0112599	0.00801243	Galnt3/Pam/Egln3/Car2/Mid1/Me1/Cp/L3mbtl3/Car12/Ltf/Mmp7/Cpm/Gch1/Aoc1/Kdm3a/Smpdl3a/Napepld/Sod3/Adh1/Lig3/Cyp2j6/Trim2/Fam20c/Rnpep/Trim45/Arg1/Alox12e/Mib2/Pepd	29
GO:1990782	MF	GO:1990782	protein tyrosine kinase binding	8/429	126/28404	0.000675607	0.0116236	0.00827129	Cdh1/Cadm4/Phyhip/Nedd9/Ptpn22/Jup/Ctnnd1/Blnk	8
GO:0004800	MF	GO:0004800	thyroxine 5'-deiodinase activity	2/429	3/28404	0.000675933	0.0116236	0.00827129	Dio2/Dio1	2
GO:0004252	MF	GO:0004252	serine-type endopeptidase activity	10/429	193/28404	0.000749078	0.0126555	0.00900554	Sec11c/Prss23/Tmprss11e/Ltf/Pcsk6/Tmprss11b/Htra1/Rhbdl2/Ctsh/Tmprss4	10
GO:0050700	MF	GO:0050700	CARD domain binding	3/429	13/28404	0.000874244	0.0143059	0.01018	Casp1/Nod1/Card10	3
GO:0016829	MF	GO:0016829	lyase activity	10/429	197/28404	0.000876477	0.0143059	0.01018	Pam/Chac2/Hmgcll1/Hmga2/Ddc/Car2/Me1/Car12/Gmds/Mgst3	10
GO:0015075	MF	GO:0015075	ion transmembrane transporter activity	25/429	834/28404	0.00100009	0.0160514	0.011422	Asic2/Grik4/Cftr/Ano4/Trpm6/Slc40a1/Slc39a8/Slc15a2/Trpv6/Slco4a1/Apol7a/Slc9a3r1/Slc34a2/Slc6a13/Atp13a4/Clca1/Kcnk1/Slc28a3/Slc25a13/Gabrp/Lrrc8d/Atp5g1/Slc5a9/Chrnb1/Tmem266	25
GO:0017022	MF	GO:0017022	myosin binding	6/429	76/28404	0.0010279	0.0162274	0.0115473	Pycard/Slc9a3r1/Trim2/Gipc1/Llgl2/Mlph	6
GO:0052689	MF	GO:0052689	carboxylic ester hydrolase activity	9/429	169/28404	0.00112327	0.017447	0.0124151	Pla2g4a/Car2/Plb1/Ces2b/Gdpd1/Pla2g7/Faah/Pla2g2e/Acot11	9
GO:0016810	MF	GO:0016810	hydrolase activity, acting on carbon-nitrogen (but not peptide) bonds	8/429	137/28404	0.0011653	0.0178125	0.0126752	Adar/Gch1/Padi2/Vnn1/Ampd3/Arg1/Faah/Aspa	8
GO:0015267	MF	GO:0015267	channel activity	17/429	483/28404	0.00120311	0.0178246	0.0126838	Asic2/Grik4/Cftr/Ano4/Trpm6/Trpv6/Apol7a/Slc14a1/Clca1/Kcnk1/Gjb6/Gja3/Gabrp/Lrrc8d/Atp5g1/Chrnb1/Tmem266	17
GO:0022803	MF	GO:0022803	passive transmembrane transporter activity	17/429	483/28404	0.00120311	0.0178246	0.0126838	Asic2/Grik4/Cftr/Ano4/Trpm6/Trpv6/Apol7a/Slc14a1/Clca1/Kcnk1/Gjb6/Gja3/Gabrp/Lrrc8d/Atp5g1/Chrnb1/Tmem266	17
GO:0030545	MF	GO:0030545	signaling receptor regulator activity	19/429	573/28404	0.00127502	0.0186037	0.0132382	Lypd6b/Ifne/Ntf3/Iapp/Grem2/Stc2/Wnt4/Inhbb/Wnt7a/Ly6h/Nrg2/Scg2/a/Wnt7b/Pdgfa/Il33/Edn2/Bmp4/Cxcl17	19
GO:0016628	MF	GO:0016628	oxidoreductase activity, acting on the CH-CH group of donors, NAD or NADP as acceptor	4/429	32/28404	0.00132021	0.0189532	0.0134869	Akr1c14/Akr1c12/Akr1c19/Akr1c13	4
GO:0004144	MF	GO:0004144	diacylglycerol O-acyltransferase activity	2/429	4/28404	0.00133833	0.0189532	0.0134869	Mogat1/Dgat2	2
GO:1901681	MF	GO:1901681	sulfur compound binding	12/429	284/28404	0.0013852	0.0193326	0.0137569	Grem2/Adgrg1/Ltf/Crispld2/Mmp7/Aoc1/Pcsk6/Pcolce2/Bmp4/Fgfr2/Lamc2/Acot11	12
GO:0016620	MF	GO:0016620	oxidoreductase activity, acting on the aldehyde or oxo group of donors, NAD or NADP as acceptor	5/429	55/28404	0.00143635	0.01976	0.0140611	Akr1c14/Akr1c12/Aldh1a1/Akr1c19/Akr1c13	5
GO:0004623	MF	GO:0004623	phospholipase A2 activity	4/429	34/28404	0.00166266	0.0225513	0.0160473	Pla2g4a/Plb1/Pla2g7/Pla2g2e	4
GO:0015103	MF	GO:0015103	inorganic anion transmembrane transporter activity	8/429	149/28404	0.00198595	0.0265621	0.0189014	Cftr/Ano4/Slc39a8/Apol7a/Slc6a13/Clca1/Gabrp/Lrrc8d	8
GO:0003846	MF	GO:0003846	2-acylglycerol O-acyltransferase activity	2/429	5/28404	0.00220826	0.0289359	0.0205906	Mogat1/Dgat2	2
GO:0019838	MF	GO:0019838	growth factor binding	8/429	152/28404	0.00224915	0.0289359	0.0205906	Ntf3/Ltbp1/Igfbp2/Pcsk6/Pdgfa/Fgfr2/Htra1/Srpx2	8
GO:1901981	MF	GO:1901981	phosphatidylinositol phosphate binding	9/429	187/28404	0.00225358	0.0289359	0.0205906	Pla2g4a/Myo1b/Exoc1/Dennd1a/Sdcbp2/Myo10/Avil/Capg/Plek2	9
GO:0030165	MF	GO:0030165	PDZ domain binding	7/429	122/28404	0.00258355	0.0320667	0.0228184	Igsf5/Cftr/F11r/Slc9a3r1/Gipc1/Llgl2/Cxadr	7
GO:0005125	MF	GO:0005125	cytokine activity	10/429	228/28404	0.00259129	0.0320667	0.0228184	Ifne/Grem2/Wnt4/Inhbb/Wnt7a/Scg2/Wnt7b/Il33/Bmp4/Cxcl17	10
GO:0048018	MF	GO:0048018	receptor ligand activity	17/429	520/28404	0.0026044	0.0320667	0.0228184	Ifne/Ntf3/Iapp/Grem2/Stc2/Wnt4/Inhbb/Wnt7a/Nrg2/Scg2/a/Wnt7b/Pdgfa/Il33/Edn2/Bmp4/Cxcl17	17
GO:0030145	MF	GO:0030145	manganese ion binding	5/429	63/28404	0.0026306	0.0320667	0.0228184	Galnt3/Me1/Fam20c/Arg1/Pepd	5
GO:0004435	MF	GO:0004435	phosphatidylinositol phospholipase C activity	3/429	19/28404	0.0027694	0.0329251	0.0234292	Plch2/Plcd3/Plch1	3
GO:0004629	MF	GO:0004629	phospholipase C activity	3/429	19/28404	0.0027694	0.0329251	0.0234292	Plch2/Plcd3/Plch1	3
GO:0033293	MF	GO:0033293	monocarboxylic acid binding	6/429	93/28404	0.00289385	0.0338032	0.0240541	Ffar4/Akr1c14/Akr1c12/Akr1c19/Akr1c13/Napepld	6
GO:0016788	MF	GO:0016788	hydrolase activity, acting on ester bonds	22/429	758/28404	0.00291346	0.0338032	0.0240541	Plch2/Pla2g4a/Pfkfb3/Plcd3/Ptpru/Pde7b/Car2/Plb1/Smpd3/Lpin3/Plch1/Ptpn22/Eya2/Smpdl3a/Napepld/Ces2b/Gdpd1/Pla2g7/Faah/Aspa/Pla2g2e/Acot11	22
GO:0042578	MF	GO:0042578	phosphoric ester hydrolase activity	13/429	353/28404	0.00298685	0.0341823	0.0243238	Plch2/Pfkfb3/Plcd3/Ptpru/Pde7b/Smpd3/Lpin3/Plch1/Ptpn22/Eya2/Smpdl3a/Napepld/Gdpd1	13
GO:0016655	MF	GO:0016655	oxidoreductase activity, acting on NAD(P)H, quinone or similar compound as acceptor	4/429	40/28404	0.00305166	0.0341823	0.0243238	Akr1c14/Akr1c12/Akr1c19/Akr1c13	4
GO:0005253	MF	GO:0005253	anion channel activity	6/429	94/28404	0.00305262	0.0341823	0.0243238	Cftr/Ano4/Apol7a/Clca1/Gabrp/Lrrc8d	6
GO:0030546	MF	GO:0030546	signaling receptor activator activity	17/429	529/28404	0.00309965	0.0343099	0.0244146	Ifne/Ntf3/Iapp/Grem2/Stc2/Wnt4/Inhbb/Wnt7a/Nrg2/Scg2/a/Wnt7b/Pdgfa/Il33/Edn2/Bmp4/Cxcl17	17
GO:0016903	MF	GO:0016903	oxidoreductase activity, acting on the aldehyde or oxo group of donors	5/429	66/28404	0.003224	0.0352808	0.0251055	Akr1c14/Akr1c12/Aldh1a1/Akr1c19/Akr1c13	5
GO:0004128	MF	GO:0004128	cytochrome-b5 reductase activity, acting on NAD(P)H	2/429	6/28404	0.00327931	0.0353645	0.0251651	Cyb5r4/Por	2
GO:0005109	MF	GO:0005109	frizzled binding	4/429	41/28404	0.00334181	0.0353645	0.0251651	Wnt4/Wnt7a/Rnf43/Wnt7b	4
GO:0042056	MF	GO:0042056	chemoattractant activity	4/429	41/28404	0.00334181	0.0353645	0.0251651	Ntf3/Scg2/Wnt7b/Bmp4	4
GO:0015294	MF	GO:0015294	solute:cation symporter activity	6/429	96/28404	0.00338956	0.0354799	0.0252472	Slc39a8/Slc15a2/Slc34a2/Slc6a13/Slc28a3/Slc5a9	6
GO:0008013	MF	GO:0008013	beta-catenin binding	6/429	97/28404	0.00356805	0.0369466	0.0262909	Klf4/Cdh1/Ptpru/Ctnnd1/Slc9a3r1/Cxadr	6
GO:0005507	MF	GO:0005507	copper ion binding	5/429	68/28404	0.00366956	0.0375935	0.0267512	Pam/Cp/Aoc1/Sod3/Rnpep	5
GO:0004622	MF	GO:0004622	lysophospholipase activity	3/429	21/28404	0.00371713	0.03768	0.0268128	Pla2g4a/Plb1/Gdpd1	3
GO:0016504	MF	GO:0016504	peptidase activator activity	4/429	43/28404	0.0039773	0.0398973	0.0283906	Pycard/Pcolce2/Fbln1/Ctsh	4
GO:0004175	MF	GO:0004175	endopeptidase activity	15/429	453/28404	0.00403933	0.0401018	0.0285361	Sec11c/Prss23/Casp1/Tmprss11e/Ltf/Adam28/Mmp7/Pcsk6/Pycard/Tmprss11b/Htra1/Rhbdl2/Bace2/Ctsh/Tmprss4	15
GO:0015185	MF	GO:0015185	gamma-aminobutyric acid transmembrane transporter activity	2/429	7/28404	0.00454524	0.0442128	0.0314615	Slc9a3r1/Slc6a13	2
GO:0016842	MF	GO:0016842	amidine-lyase activity	2/429	7/28404	0.00454524	0.0442128	0.0314615	Pam/Chac2	2

## Sheet: Supplementary File 3d
Supplementary Table 4: Gene Ontology enrichment analysis of shared direct target genes of SMAD1/5 from the down-targets (Plotted in Figure 3F)
	ONTOLOGY	ID	Description	GeneRatio	BgRatio	pvalue	p.adjust	qvalue	geneID	Count
GO:0001944	BP	GO:0001944	vasculature development	66/512	799/28943	1.50374e-25	9.18482e-22	5.79809e-22	Jak1/Bmper/Has2/Tcf4/Vav3/Stard13/Wnt5a/Rbpj/Gli3/Tiparp/Cd36/Col18a1/Hgf/Pdgfd/Itgb8/Tgfbr3/Cyp1b1/Col22a1/Add1/Ptn/Pde2a/Ndp/Heg1/Prdm1/Ccr2/Osr1/Smarca2/Prickle1/Rtn4/Hif1a/Lef1/Kat6a/Ccbe1/Slc4a7/Pcsk5/Atp7a/Sema5a/Igf1/Pdgfra/Atp2b4/Ddah1/Cxcl12/Gpc3/Nog/Tmem100/Col15a1/Fzd4/Zmiz1/Adamts1/Calca/Sfrp2/Abl1/Cdh5/Eng/Dab2ip/Ago2/Sufu/Prkd2/Tgfb2/Fn1/Ccl2/Ace/Aplnr/Lif/Ppp1r16b/Notch3	66
GO:0035239	BP	GO:0035239	tube morphogenesis	71/512	959/28943	1.27263e-24	3.88663e-21	2.45351e-21	Jak1/Bmper/Has2/Tcf4/Vav3/Stard13/Wnt5a/Cobl/Cthrc1/Rbpj/Pbx1/Egfr/Gli3/Tiparp/Cd36/Col18a1/Hgf/Itgb8/Tgfbr3/Cyp1b1/Zeb2/Dlc1/Col22a1/Add1/Ptn/Heg1/Prdm1/Ccr2/Osr1/Prickle1/Rtn4/Hif1a/Lef1/Kat6a/Zeb1/Ccbe1/Sema5a/Fzd1/Igf1/Pdgfra/Atp2b4/Ddah1/Cxcl12/Gpc3/Areg/Nog/Tmem100/Col15a1/Fzd4/Zmiz1/Adamts1/Ptch1/Sfrp2/Abl1/Cdh5/Eng/Myc/Dab2ip/Ago2/Sufu/Prkd2/Tgfb2/Fn1/Wnt6/Ccl2/Ace/Aplnr/Lif/Ppp1r16b/Notc…	71
GO:0001568	BP	GO:0001568	blood vessel development	61/512	762/28943	6.03121e-23	1.22795e-19	7.75169e-20	Jak1/Bmper/Has2/Tcf4/Vav3/Stard13/Wnt5a/Rbpj/Gli3/Tiparp/Cd36/Col18a1/Hgf/Pdgfd/Itgb8/Tgfbr3/Cyp1b1/Col22a1/Add1/Ptn/Pde2a/Heg1/Prdm1/Ccr2/Osr1/Prickle1/Rtn4/Hif1a/Lef1/Kat6a/Ccbe1/Pcsk5/Atp7a/Sema5a/Pdgfra/Atp2b4/Ddah1/Cxcl12/Gpc3/Nog/Tmem100/Col15a1/Fzd4/Zmiz1/Adamts1/Sfrp2/Abl1/Cdh5/Eng/Dab2ip/Ago2/Sufu/Prkd2/Tgfb2/Fn1/Ccl2/Ace/Aplnr/Lif/Ppp1r16b/Notch3	61
GO:0030334	BP	GO:0030334	regulation of cell migration	66/512	991/28943	1.89105e-20	2.88764e-17	1.82287e-17	Bmper/Edn3/Has2/Lama2/Pfn2/Stard13/Wnt5a/Egfr/Dab2/Col18a1/Hgf/Selp/Pdgfd/Tgfbr3/Cyp1b1/Dlc1/Ptprg/Ptn/Ccr2/Vim/Nedd9/Jam2/Macf1/Tcaf1/Xcl1/Camk1d/Rtn4/Hif1a/Lef1/Ccbe1/Pcsk5/Synpo2/Atp7a/Sema5a/Igf1/Pdgfra/Atp2b4/Msn/Ptprc/Cxcl12/Tcaf2/Chst2/Nog/Prr5l/Fzd4/Adamts1/Rdx/Arsb/Sfrp2/Abl1/Snai2/Cdh5/Slk/Eng/Myc/Dab2ip/Ago2/Prkd2/Tgfb2/Fn1/Ccl2/Ppm1f/Ntng2/Ace/Ccr5/Spag9	66
GO:0030155	BP	GO:0030155	regulation of cell adhesion	59/512	812/28943	3.76846e-20	4.60355e-17	2.90607e-17	Jak1/Has2/Lama2/Tenm3/Vav3/Wnt5a/Lamc1/Rbpj/Dab2/Gli3/Cd36/Selp/Magi1/Cyp1b1/Vit/Nid1/Dlc1/Ank3/Ptn/Abi3bp/Adam19/Ccr2/Nedd9/Jam2/Smarca2/Macf1/Col26a1/Xcl1/Egflam/Lef1/Pcsk5/Myo10/Sema5a/Igf1/Abat/Apbb1ip/Ptprc/Cxcl12/Chst2/Spock2/Fzd4/Zmiz1/Rdx/Calca/Abl1/Snai2/Zdhhc2/Slk/Smoc1/Prkd2/Tgfb2/Fn1/Ccl2/Ppm1f/Ccr5/Mad2l2/Efnb3/Lif/Cd83	59
GO:0000904	BP	GO:0000904	cell morphogenesis involved in differentiation	59/512	835/28943	1.4441e-19	1.4701e-16	9.28027e-17	Edn3/Has2/Lama2/Map2/Wnt5a/Cobl/Lamc1/Cdh11/Frmd6/Ccdc141/Dab2/Gli3/Col18a1/Ube3a/Prex2/Dclk1/Zeb2/Pard3/Palld/Col22a1/Ank3/Ppfia2/Ptn/Btbd3/Nrn1/Heg1/Caprin2/Vim/Nedd9/Macf1/Slitrk3/Slit3/Ablim1/Rtn4/Abi2/Lef1/Atp7a/Rbfox2/Sema5a/Cxcl12/Tsku/Apbb2/Nog/Col15a1/Fzd4/Ptch1/Abl1/B4galt6/Mef2a/Tiam2/Mark2/Tgfb2/Fn1/Ntng2/Ccr5/Efnb3/Matn2/Notch3/Shank3	59
GO:0048514	BP	GO:0048514	blood vessel morphogenesis	52/512	663/28943	2.77753e-19	2.42359e-16	1.52994e-16	Jak1/Bmper/Has2/Tcf4/Vav3/Stard13/Wnt5a/Rbpj/Tiparp/Cd36/Col18a1/Hgf/Itgb8/Tgfbr3/Cyp1b1/Col22a1/Add1/Ptn/Heg1/Prdm1/Ccr2/Rtn4/Hif1a/Lef1/Kat6a/Ccbe1/Sema5a/Pdgfra/Atp2b4/Ddah1/Cxcl12/Nog/Tmem100/Col15a1/Fzd4/Zmiz1/Adamts1/Sfrp2/Abl1/Cdh5/Eng/Dab2ip/Ago2/Prkd2/Tgfb2/Fn1/Ccl2/Ace/Aplnr/Lif/Ppp1r16b/Notch3	52
GO:0045785	BP	GO:0045785	positive regulation of cell adhesion	45/512	510/28943	9.00034e-19	6.87176e-16	4.33793e-16	Jak1/Has2/Lama2/Vav3/Wnt5a/Lamc1/Dab2/Gli3/Cd36/Selp/Magi1/Vit/Nid1/Ank3/Ptn/Abi3bp/Adam19/Ccr2/Nedd9/Smarca2/Col26a1/Xcl1/Egflam/Lef1/Pcsk5/Myo10/Igf1/Apbb1ip/Ptprc/Cxcl12/Chst2/Spock2/Zmiz1/Calca/Abl1/Smoc1/Prkd2/Tgfb2/Fn1/Ccl2/Ppm1f/Ccr5/Efnb3/Lif/Cd83	45
GO:0030198	BP	GO:0030198	extracellular matrix organization	36/512	322/28943	1.57698e-18	1.06657e-15	6.73295e-16	Col14a1/Has2/Lama2/Lamc1/Olfml2b/Col18a1/Col4a5/Ric1/Cyp1b1/Vit/Nid1/Col22a1/Col11a1/Abi3bp/Egflam/Col4a6/Atp7a/Adamts15/Sema5a/Pdgfra/Spock2/Apbb2/Col15a1/Adamts1/Sfrp2/Ptx3/Abl1/Scara3/Eng/Smoc1/Tgfb2/Fn1/Col23a1/Ntng2/Matn2/Fscn1	36
GO:0043062	BP	GO:0043062	extracellular structure organization	36/512	323/28943	1.74619e-18	1.06657e-15	6.73295e-16	Col14a1/Has2/Lama2/Lamc1/Olfml2b/Col18a1/Col4a5/Ric1/Cyp1b1/Vit/Nid1/Col22a1/Col11a1/Abi3bp/Egflam/Col4a6/Atp7a/Adamts15/Sema5a/Pdgfra/Spock2/Apbb2/Col15a1/Adamts1/Sfrp2/Ptx3/Abl1/Scara3/Eng/Smoc1/Tgfb2/Fn1/Col23a1/Ntng2/Matn2/Fscn1	36
GO:0045229	BP	GO:0045229	external encapsulating structure organization	36/512	324/28943	1.93281e-18	1.07324e-15	6.77501e-16	Col14a1/Has2/Lama2/Lamc1/Olfml2b/Col18a1/Col4a5/Ric1/Cyp1b1/Vit/Nid1/Col22a1/Col11a1/Abi3bp/Egflam/Col4a6/Atp7a/Adamts15/Sema5a/Pdgfra/Spock2/Apbb2/Col15a1/Adamts1/Sfrp2/Ptx3/Abl1/Scara3/Eng/Smoc1/Tgfb2/Fn1/Col23a1/Ntng2/Matn2/Fscn1	36
GO:0032990	BP	GO:0032990	cell part morphogenesis	54/512	758/28943	3.93317e-18	2.00198e-15	1.26379e-15	Edn3/Lama2/Map2/Wnt5a/Cobl/Cdh11/Ccdc141/Gli3/Ube3a/Pid1/Prex2/Dclk1/Zeb2/Fez1/Ank3/Ppfia2/Ptn/Btbd3/Nrn1/Caprin2/Vim/Macf1/Cpne5/Slitrk3/Slit3/Ablim1/Rtn4/Abi2/Atp7a/Rbfox2/Sema5a/Cxcl12/Gas7/Tsku/Apbb2/Nog/Fzd4/Ptch1/Abl1/B4galt6/Mef2a/Tiam2/Mark2/Dab2ip/Tgfb2/Fn1/Ntng2/Rnf157/Ccr5/Cpne1/Efnb3/Matn2/Notch3/Shank3	54
GO:0048812	BP	GO:0048812	neuron projection morphogenesis	52/512	715/28943	7.13793e-18	3.35373e-15	2.1171e-15	Edn3/Lama2/Map2/Wnt5a/Cobl/Cdh11/Ccdc141/Gli3/Ube3a/Prex2/Dclk1/Zeb2/Ank3/Ppfia2/Ptn/Btbd3/Nrn1/Caprin2/Vim/Macf1/Cpne5/Slitrk3/Slit3/Ablim1/Rtn4/Abi2/Atp7a/Rbfox2/Sema5a/Cxcl12/Gas7/Tsku/Apbb2/Nog/Fzd4/Ptch1/Abl1/B4galt6/Mef2a/Tiam2/Mark2/Dab2ip/Tgfb2/Fn1/Ntng2/Rnf157/Ccr5/Cpne1/Efnb3/Matn2/Notch3/Shank3	52
GO:0120039	BP	GO:0120039	plasma membrane bounded cell projection morphogenesis	52/512	730/28943	1.71937e-17	7.50139e-15	4.73539e-15	Edn3/Lama2/Map2/Wnt5a/Cobl/Cdh11/Ccdc141/Gli3/Ube3a/Prex2/Dclk1/Zeb2/Ank3/Ppfia2/Ptn/Btbd3/Nrn1/Caprin2/Vim/Macf1/Cpne5/Slitrk3/Slit3/Ablim1/Rtn4/Abi2/Atp7a/Rbfox2/Sema5a/Cxcl12/Gas7/Tsku/Apbb2/Nog/Fzd4/Ptch1/Abl1/B4galt6/Mef2a/Tiam2/Mark2/Dab2ip/Tgfb2/Fn1/Ntng2/Rnf157/Ccr5/Cpne1/Efnb3/Matn2/Notch3/Shank3	52
GO:0048858	BP	GO:0048858	cell projection morphogenesis	52/512	735/28943	2.2926e-17	9.33545e-15	5.89318e-15	Edn3/Lama2/Map2/Wnt5a/Cobl/Cdh11/Ccdc141/Gli3/Ube3a/Prex2/Dclk1/Zeb2/Ank3/Ppfia2/Ptn/Btbd3/Nrn1/Caprin2/Vim/Macf1/Cpne5/Slitrk3/Slit3/Ablim1/Rtn4/Abi2/Atp7a/Rbfox2/Sema5a/Cxcl12/Gas7/Tsku/Apbb2/Nog/Fzd4/Ptch1/Abl1/B4galt6/Mef2a/Tiam2/Mark2/Dab2ip/Tgfb2/Fn1/Ntng2/Rnf157/Ccr5/Cpne1/Efnb3/Matn2/Notch3/Shank3	52
GO:0032989	BP	GO:0032989	cellular component morphogenesis	56/512	861/28943	5.32103e-17	2.0313e-14	1.2823e-14	Edn3/Lama2/Map2/Wnt5a/Cobl/Cdh11/Ccdc141/Gli3/Ube3a/Pid1/Prex2/Dclk1/Zeb2/Fez1/Ank3/Ppfia2/Ptn/Btbd3/Nrn1/Caprin2/Vim/Macf1/Cpne5/Slitrk3/Slit3/Ablim1/Rtn4/Abi2/Atp7a/Rbfox2/Sema5a/Pdgfra/Cxcl12/Gas7/Tsku/Apbb2/Nog/Fzd4/Ptch1/Tmod2/Abl1/B4galt6/Mef2a/Tiam2/Mark2/Dab2ip/Tgfb2/Fn1/Ntng2/Rnf157/Ccr5/Cpne1/Efnb3/Matn2/Notch3/Shank3	56
GO:0001525	BP	GO:0001525	angiogenesis	43/512	550/28943	4.55013e-16	1.63483e-13	1.03202e-13	Jak1/Bmper/Tcf4/Vav3/Stard13/Wnt5a/Rbpj/Cd36/Col18a1/Hgf/Itgb8/Cyp1b1/Col22a1/Add1/Ptn/Ccr2/Rtn4/Hif1a/Lef1/Ccbe1/Sema5a/Pdgfra/Atp2b4/Ddah1/Cxcl12/Tmem100/Col15a1/Adamts1/Sfrp2/Abl1/Cdh5/Eng/Dab2ip/Ago2/Prkd2/Tgfb2/Fn1/Ccl2/Ace/Aplnr/Lif/Ppp1r16b/Notch3	43
GO:0030335	BP	GO:0030335	positive regulation of cell migration	44/512	578/28943	5.40193e-16	1.83305e-13	1.15715e-13	Edn3/Has2/Wnt5a/Egfr/Dab2/Col18a1/Hgf/Selp/Pdgfd/Cyp1b1/Ptn/Ccr2/Nedd9/Jam2/Xcl1/Camk1d/Rtn4/Hif1a/Lef1/Ccbe1/Pcsk5/Synpo2/Atp7a/Sema5a/Igf1/Pdgfra/Ptprc/Cxcl12/Tcaf2/Fzd4/Adamts1/Rdx/Abl1/Snai2/Cdh5/Myc/Dab2ip/Ago2/Prkd2/Tgfb2/Fn1/Ccl2/Ppm1f/Spag9	44
GO:2000147	BP	GO:2000147	positive regulation of cell motility	45/512	605/28943	5.84309e-16	1.8784e-13	1.18577e-13	Edn3/Has2/Wnt5a/Egfr/Dab2/Col18a1/Hgf/Selp/Pdgfd/Cyp1b1/Ptn/Ccr2/Nedd9/Jam2/Xcl1/Camk1d/Rtn4/Hif1a/Lef1/Ccbe1/Pcsk5/Synpo2/Atp7a/Sema5a/Igf1/Pdgfra/Ptprc/Cxcl12/Tcaf2/Fzd4/Adamts1/Rdx/Abl1/Snai2/Cdh5/Myc/Dab2ip/Ago2/Prkd2/Tgfb2/Fn1/Ccl2/Ppm1f/Spag9/Tac2	45
GO:0040017	BP	GO:0040017	positive regulation of locomotion	45/512	622/28943	1.61929e-15	4.94532e-13	3.12183e-13	Edn3/Has2/Wnt5a/Egfr/Dab2/Col18a1/Hgf/Selp/Pdgfd/Cyp1b1/Ptn/Ccr2/Nedd9/Jam2/Xcl1/Camk1d/Rtn4/Hif1a/Lef1/Ccbe1/Pcsk5/Synpo2/Atp7a/Sema5a/Igf1/Pdgfra/Ptprc/Cxcl12/Tcaf2/Fzd4/Adamts1/Rdx/Abl1/Snai2/Cdh5/Myc/Dab2ip/Ago2/Prkd2/Tgfb2/Fn1/Ccl2/Ppm1f/Spag9/Tac2	45
GO:0007507	BP	GO:0007507	heart development	46/512	653/28943	2.08749e-15	6.0716e-13	3.83281e-13	Col14a1/Has2/Wnt5a/Rbpj/Hopx/Egfr/Gli3/Tgfbr3/Dlc1/Col11a1/Pde2a/Mdm4/Abi3bp/Heg1/Adam19/Prdm1/Vcan/Osr1/Prickle1/Slit3/Rtn4/Hif1a/Kat6a/Pcsk5/Fzd1/Igf1/Pdgfra/Ccnd2/Gpc3/Nog/Tmem100/Zmiz1/Adamts1/Dzip1/Ptch1/Sfrp2/Snai2/Zmpste24/Mef2a/Eng/Rgs2/Sufu/Tgfb2/Fn1/Ace/Aplnr	46
GO:0030111	BP	GO:0030111	regulation of Wnt signaling pathway	32/512	319/28943	3.01691e-15	8.37603e-13	5.28753e-13	Rbms3/Wnt5a/Cthrc1/Rbpj/Tle4/Egfr/Dab2/Gli3/Zeb2/Grb10/Apcdd1/Caprin2/Macf1/Prickle1/Lef1/Gprc5b/Sema5a/Fzd1/Gpc3/Shisa3/Tsku/Nog/Tnks/Fzd4/Sfrp4/Zbed3/Sfrp2/Abl1/Snai2/Nkd2/Dab2ip/Mad2l2	32
GO:0071363	BP	GO:0071363	cellular response to growth factor stimulus	46/512	662/28943	3.46545e-15	8.88345e-13	5.60784e-13	Bmper/Has2/Tcf4/Wnt5a/Rbpj/Fst/Egfr/Dab2/Hgf/Pdgfd/Itgb8/Tgfbr3/Zeb2/Grb10/Xcl1/Hif1a/Lef1/Zeb1/Ccbe1/Kcnd3/Atp7a/Fzd1/Pdgfra/Atp2b4/Myof/Gpc3/Tsku/Nog/Tmem100/Fzd4/Zmiz1/Sfrp4/Calca/Zfyve9/Sfrp2/Zfp451/Abl1/Snai2/Cdh5/Eng/Zfp423/Dab2ip/Prkd2/Tgfb2/Ccl2/Fstl1	46
GO:0034330	BP	GO:0034330	cell junction organization	50/512	773/28943	3.49055e-15	8.88345e-13	5.60784e-13	Pfn2/Ect2/Wnt5a/Lamc1/Cdh11/Hopx/Ube3a/Gpc6/Col4a5/Pard3/Palld/Dlc1/Filip1/Ank3/Ppfia2/Add1/Ptn/Lrrn1/Synpo/Heg1/Caprin2/Cdh10/Pdzrn3/Macf1/Arvcf/Slitrk3/Erc1/Abi2/Wasf3/Shroom2/Fzd1/Ppfibp1/Kirrel/Rdx/Clstn1/Abl1/Snai2/Zdhhc2/Cdh5/Slk/Dab2ip/Tgfb2/Fn1/Ppm1f/Ntng2/Ace/Fbf1/Fscn1/Aplnr/Shank3	50
GO:0048667	BP	GO:0048667	cell morphogenesis involved in neuron differentiation	46/512	663/28943	3.66413e-15	8.95221e-13	5.65125e-13	Edn3/Lama2/Map2/Wnt5a/Cobl/Cdh11/Ccdc141/Gli3/Ube3a/Prex2/Dclk1/Zeb2/Ank3/Ppfia2/Ptn/Btbd3/Nrn1/Caprin2/Vim/Macf1/Slitrk3/Slit3/Ablim1/Rtn4/Abi2/Atp7a/Rbfox2/Sema5a/Cxcl12/Tsku/Apbb2/Nog/Ptch1/Abl1/B4galt6/Mef2a/Tiam2/Mark2/Tgfb2/Fn1/Ntng2/Ccr5/Efnb3/Matn2/Notch3/Shank3	46
GO:0048729	BP	GO:0048729	tissue morphogenesis	47/512	697/28943	5.27262e-15	1.23866e-12	7.81927e-13	Stard13/Wnt5a/Cobl/Cthrc1/Lamc1/Rbpj/Pbx1/Fst/Egfr/Dab2/Gli3/Hgf/Tgfbr3/Zeb2/Pard3/Dlc1/Col11a1/Mdm4/Heg1/Osr1/Macf1/Prickle1/Hif1a/Lef1/Atp7a/Sema5a/Fzd1/Igf1/Pdgfra/Msn/Cxcl12/Gpc3/Areg/Nog/Tmem100/Ptch1/Sfrp2/Abl1/Snai2/Eng/Myc/Sufu/Tgfb2/Wnt6/Aplnr/Lif/Shank3	47
GO:0070848	BP	GO:0070848	response to growth factor	46/512	676/28943	7.48742e-15	1.64202e-12	1.03656e-12	Bmper/Has2/Tcf4/Wnt5a/Rbpj/Fst/Egfr/Dab2/Hgf/Pdgfd/Itgb8/Tgfbr3/Zeb2/Grb10/Xcl1/Hif1a/Lef1/Zeb1/Ccbe1/Kcnd3/Atp7a/Fzd1/Pdgfra/Atp2b4/Myof/Gpc3/Tsku/Nog/Tmem100/Fzd4/Zmiz1/Sfrp4/Calca/Zfyve9/Sfrp2/Zfp451/Abl1/Snai2/Cdh5/Eng/Zfp423/Dab2ip/Prkd2/Tgfb2/Ccl2/Fstl1	46
GO:0045765	BP	GO:0045765	regulation of angiogenesis	31/512	308/28943	7.52727e-15	1.64202e-12	1.03656e-12	Jak1/Bmper/Tcf4/Stard13/Wnt5a/Cd36/Hgf/Itgb8/Cyp1b1/Add1/Ptn/Ccr2/Rtn4/Hif1a/Ccbe1/Sema5a/Atp2b4/Ddah1/Adamts1/Sfrp2/Abl1/Cdh5/Eng/Dab2ip/Ago2/Prkd2/Tgfb2/Ccl2/Aplnr/Lif/Ppp1r16b	31
GO:1901342	BP	GO:1901342	regulation of vasculature development	31/512	312/28943	1.07403e-14	2.26212e-12	1.42801e-12	Jak1/Bmper/Tcf4/Stard13/Wnt5a/Cd36/Hgf/Itgb8/Cyp1b1/Add1/Ptn/Ccr2/Rtn4/Hif1a/Ccbe1/Sema5a/Atp2b4/Ddah1/Adamts1/Sfrp2/Abl1/Cdh5/Eng/Dab2ip/Ago2/Prkd2/Tgfb2/Ccl2/Aplnr/Lif/Ppp1r16b	31
GO:0016055	BP	GO:0016055	Wnt signaling pathway	37/512	451/28943	1.23235e-14	2.50906e-12	1.58389e-12	Rbms3/Wnt5a/Cthrc1/Rbpj/Tle4/Egfr/Dab2/Gli3/Zeb2/Grb10/Apcdd1/Ndp/Caprin2/Macf1/Prickle1/Lef1/Gprc5b/Sema5a/Fzd1/Ednrb/Gpc3/Shisa3/Tsku/Nog/Tnks/Fzd4/Sfrp4/Zbed3/Sfrp2/Abl1/Snai2/Nkd2/Myc/Mark2/Dab2ip/Wnt6/Mad2l2	37
GO:0198738	BP	GO:0198738	cell-cell signaling by wnt	37/512	453/28943	1.41482e-14	2.78764e-12	1.75975e-12	Rbms3/Wnt5a/Cthrc1/Rbpj/Tle4/Egfr/Dab2/Gli3/Zeb2/Grb10/Apcdd1/Ndp/Caprin2/Macf1/Prickle1/Lef1/Gprc5b/Sema5a/Fzd1/Ednrb/Gpc3/Shisa3/Tsku/Nog/Tnks/Fzd4/Sfrp4/Zbed3/Sfrp2/Abl1/Snai2/Nkd2/Myc/Mark2/Dab2ip/Wnt6/Mad2l2	37
GO:0098609	BP	GO:0098609	cell-cell adhesion	52/512	878/28943	3.23992e-14	6.1842e-12	3.90389e-12	Jak1/Has2/Tenm3/Wnt5a/Dlg2/Cdh11/Ccdc141/Egfr/Gli3/Selp/Gpc6/Magi1/Cd93/Cyp1b1/Pard3/Palld/Ank3/Adam19/Ccr2/Cdh10/Jam2/Smarca2/Arvcf/Slitrk3/Xcl1/Lef1/Myo10/Igf1/Abat/Pdgfra/Msn/Ptprc/Cxcl12/Chst2/Kirrel/Zmiz1/Rdx/Calca/Clstn1/Abl1/Zdhhc2/Cdh5/Tgfb2/Fn1/Ccl2/Ppm1f/Ntng2/Ccr5/Mad2l2/Efnb3/Igdcc4/Cd83	52
GO:0060485	BP	GO:0060485	mesenchyme development	30/512	304/28943	3.48897e-14	6.45776e-12	4.07658e-12	Edn3/Has2/Wnt5a/Cyp26a1/Rbpj/Dab2/Tgfbr3/Zeb2/Mdm4/Bnc2/Osr1/Kbtbd8/Rtn4/Hif1a/Lef1/Ddx17/Sema5a/Ednrb/Nog/Tmem100/Sfrp2/Snai2/Eng/Myc/Dab2ip/Tgfb2/Fn1/Poglut1/Mad2l2/Aplnr	30
GO:0009792	BP	GO:0009792	embryo development ending in birth or egg hatching	52/512	883/28943	4.05215e-14	7.27957e-12	4.59536e-12	Wnt5a/Cobl/Cthrc1/Rbpj/Pbx1/Hopx/Egfr/Dab2/Gli3/Tgfbr3/Zeb2/Rcn1/Dlc1/Atp11a/Add1/Col11a1/Zbtb18/Heg1/Prdm1/Osr1/Kbtbd8/Prickle1/Tshz3/Rtn4/Abcg2/Hif1a/Lef1/Zeb1/Pcsk5/Fzd1/Igf1/Pdgfra/Osr2/Prrc2b/Nog/Brd4/Tmem100/Zmiz1/Hus1/Ptch1/Sfrp2/Abl1/Pth1r/Sufu/Xist/Sh3pxd2a/Tgfb2/Poglut1/Ace/Gpr161/Atp1b1/Lif	52
GO:0050673	BP	GO:0050673	epithelial cell proliferation	39/512	521/28943	4.53075e-14	7.9068e-12	4.99132e-12	Bmper/Has2/Wnt5a/Rbpj/Fst/Egfr/Dab2/Col18a1/Hgf/Tgfbr3/Ptn/Osr1/Rtn4/Zeb1/Atp7a/Sema5a/Aqp11/Igf1/Ednrb/Ccnd2/Osr2/Cxcl12/Gpc3/Areg/Nog/Npm1/Lipa/Ptch1/Calca/Sfrp2/Snai2/Eng/Myc/Dab2ip/Prkd2/Tgfb2/Ccl2/Aplnr/Ppp1r16b	39
GO:1905114	BP	GO:1905114	cell surface receptor signaling pathway involved in cell-cell signaling	40/512	552/28943	6.11527e-14	1.03756e-11	6.54977e-12	Rbms3/Wnt5a/Cthrc1/Rbpj/Tle4/Egfr/Dab2/Gli3/Zeb2/Grb10/Apcdd1/Ndp/Caprin2/Macf1/Prickle1/Lef1/Gprc5b/Sema5a/Fzd1/Ednrb/Abat/Gpc3/Shisa3/Tsku/Nog/Tnks/Fzd4/Sfrp4/Zbed3/Sfrp2/Abl1/Snai2/Nkd2/Myc/Zfp423/Mark2/Dab2ip/Wnt6/Mad2l2/Shank3	40
GO:0007167	BP	GO:0007167	enzyme-linked receptor protein signaling pathway	55/512	987/28943	6.85657e-14	1.13189e-11	7.14527e-12	Jak1/Bmper/Tcf4/Wnt5a/Rbpj/Arid5b/Fst/Egfr/Dab2/Tiparp/Hgf/Pdgfd/Pid1/Itgb8/Col4a5/Tgfbr3/Zeb2/Grb10/Vim/Nedd9/Rtn4/Hif1a/Lef1/Cbl/Zeb1/Ccbe1/Col4a6/Fzd1/Igf1/Pdgfra/Myof/Gpc3/Tsku/Areg/Nog/Tmem100/Fzd4/Zmiz1/Sfrp4/Zfyve9/Sfrp2/Zfp451/Abl1/C2cd5/Cdh5/Eng/Zfp423/Dab2ip/Prkd2/Tgfb2/Fam83a/Ccl2/Fstl1/Efnb3/Lif	55
GO:0010975	BP	GO:0010975	regulation of neuron projection development	40/512	556/28943	7.73152e-14	1.24274e-11	7.84503e-12	Tenm3/Map2/Wnt5a/Cobl/Dab2/Hgf/Ntm/Ube3a/Zeb2/Fez1/Ptprg/Ppfia2/Ptn/Caprin2/Vim/Cd38/Macf1/Camk1d/Rtn4/Abi2/Gprc5b/Sema5a/Fzd1/Cxcl12/Tsku/Adamts1/Arsb/Sfrp2/Abl1/Tiam2/Mark2/Rgs2/Dab2ip/Fn1/Ntng2/Ccr5/Efnb3/Lif/Shank3/Il15ra	40
GO:0060322	BP	GO:0060322	head development	47/512	751/28943	8.25846e-14	1.2934e-11	8.16485e-12	Wnt5a/Rbpj/Pbx1/Ccdc141/Arid5b/Egfr/Gli3/Tiparp/Dclk1/Zeb2/Dlc1/Zbtb18/Btbd3/Dclk2/Rtn4/Hif1a/Lef1/Kat6a/Shroom4/B3gnt5/Asph/Slc4a7/Shroom2/Atp7a/Rbfox2/Sema5a/Igf1/Pdgfra/Osr2/Cxcl12/Tsku/Nog/Crispld1/Fzd4/Zmiz1/Ptch1/Arsb/Sfrp2/Abl1/Zfp423/Dab2ip/Tgfb2/Fut10/Eml1/Tacc1/Notch3/Shank3	47
GO:0002009	BP	GO:0002009	morphogenesis of an epithelium	41/512	588/28943	1.04834e-13	1.60082e-11	1.01055e-11	Stard13/Wnt5a/Cobl/Cthrc1/Lamc1/Rbpj/Pbx1/Fst/Egfr/Dab2/Gli3/Hgf/Zeb2/Pard3/Dlc1/Osr1/Prickle1/Hif1a/Lef1/Atp7a/Sema5a/Fzd1/Igf1/Pdgfra/Msn/Cxcl12/Gpc3/Areg/Nog/Ptch1/Sfrp2/Abl1/Snai2/Eng/Myc/Sufu/Tgfb2/Wnt6/Aplnr/Lif/Shank3	41
GO:0090287	BP	GO:0090287	regulation of cellular response to growth factor stimulus	30/512	318/28943	1.14619e-13	1.70755e-11	1.07792e-11	Bmper/Tcf4/Wnt5a/Rbpj/Fst/Dab2/Tgfbr3/Zeb2/Grb10/Hif1a/Zeb1/Ccbe1/Fzd1/Atp2b4/Myof/Gpc3/Tsku/Nog/Fzd4/Sfrp4/Zfyve9/Sfrp2/Zfp451/Abl1/Cdh5/Eng/Zfp423/Dab2ip/Prkd2/Fstl1	30
GO:0031344	BP	GO:0031344	regulation of cell projection organization	47/512	763/28943	1.46714e-13	2.13364e-11	1.3469e-11	Tenm3/Pfn2/Map2/Wnt5a/Cobl/Dab2/Hgf/Ntm/Ube3a/Zeb2/Fez1/Ptprg/Ppfia2/Ptn/Caprin2/Vim/Cd38/Macf1/Camk1d/Rtn4/Abi2/Gprc5b/Atp7a/Myo10/Sema5a/Fzd1/Cxcl12/Tsku/Fzd4/Adamts1/Dzip1/Rdx/Arsb/Sfrp2/Abl1/Tiam2/Mark2/Rgs2/Dab2ip/Fn1/Ntng2/Ccr5/Efnb3/Fscn1/Lif/Shank3/Il15ra	47
GO:0060070	BP	GO:0060070	canonical Wnt signaling pathway	29/512	300/28943	1.59374e-13	2.26385e-11	1.4291e-11	Rbms3/Wnt5a/Cthrc1/Rbpj/Tle4/Egfr/Dab2/Gli3/Zeb2/Caprin2/Prickle1/Lef1/Gprc5b/Sema5a/Fzd1/Ednrb/Gpc3/Shisa3/Nog/Tnks/Fzd4/Sfrp4/Zbed3/Sfrp2/Snai2/Nkd2/Dab2ip/Wnt6/Mad2l2	29
GO:0120035	BP	GO:0120035	regulation of plasma membrane bounded cell projection organization	46/512	747/28943	2.73447e-13	3.79595e-11	2.39626e-11	Tenm3/Pfn2/Map2/Wnt5a/Cobl/Dab2/Hgf/Ntm/Ube3a/Zeb2/Fez1/Ptprg/Ppfia2/Ptn/Caprin2/Vim/Cd38/Macf1/Camk1d/Rtn4/Abi2/Gprc5b/Atp7a/Myo10/Sema5a/Fzd1/Cxcl12/Tsku/Adamts1/Dzip1/Rdx/Arsb/Sfrp2/Abl1/Tiam2/Mark2/Rgs2/Dab2ip/Fn1/Ntng2/Ccr5/Efnb3/Fscn1/Lif/Shank3/Il15ra	46
GO:0060828	BP	GO:0060828	regulation of canonical Wnt signaling pathway	26/512	249/28943	4.91998e-13	6.67805e-11	4.21564e-11	Rbms3/Wnt5a/Cthrc1/Rbpj/Tle4/Egfr/Dab2/Gli3/Zeb2/Caprin2/Prickle1/Gprc5b/Sema5a/Fzd1/Gpc3/Shisa3/Nog/Tnks/Fzd4/Sfrp4/Zbed3/Sfrp2/Snai2/Nkd2/Dab2ip/Mad2l2	26
GO:0007417	BP	GO:0007417	central nervous system development	53/512	976/28943	5.54172e-13	7.35844e-11	4.64515e-11	Map2/Wnt5a/Cyp26a1/Cdh11/Rbpj/Pbx1/Ccdc141/Egfr/Gli3/Dclk1/Vit/Zeb2/Dlc1/Ptn/Zbtb18/Btbd3/Vcan/Vim/Dclk2/Rtn4/Hif1a/Lef1/Shroom4/Zeb1/B3gnt5/Slc4a7/Wasf3/Shroom2/Atp7a/Rbfox2/Sema5a/Igf1/Cxcl12/Tsku/Nog/Fzd4/Zmiz1/Ptch1/Scin/Arsb/Sfrp2/Abl1/B4galt6/Zfp423/Dab2ip/Sufu/Fut10/Abcb1b/Eml1/Tacc1/Lif/Notch3/Shank3	53
GO:0043009	BP	GO:0043009	chordate embryonic development	49/512	867/28943	1.04686e-12	1.35873e-10	8.57721e-11	Wnt5a/Cobl/Cthrc1/Rbpj/Pbx1/Hopx/Egfr/Dab2/Gli3/Tgfbr3/Zeb2/Rcn1/Dlc1/Atp11a/Add1/Col11a1/Zbtb18/Heg1/Prdm1/Osr1/Kbtbd8/Prickle1/Tshz3/Rtn4/Hif1a/Lef1/Zeb1/Pcsk5/Fzd1/Igf1/Pdgfra/Osr2/Prrc2b/Nog/Brd4/Tmem100/Zmiz1/Ptch1/Sfrp2/Abl1/Pth1r/Sufu/Xist/Sh3pxd2a/Tgfb2/Poglut1/Gpr161/Atp1b1/Lif	49
GO:0000122	BP	GO:0000122	negative regulation of transcription by RNA polymerase II	52/512	961/28943	1.06776e-12	1.35873e-10	8.57721e-11	Zbtb20/Tcf4/Jazf1/Nfil3/Rbpj/Tle4/Hopx/Arid5b/Fst/Dab2/Gli3/Cd36/Zeb2/Zbtb18/Pde2a/Mdm4/Prdm1/Osr1/Hmbox1/Hif1a/Lef1/Xpo1/Satb1/Zeb1/Ednrb/Osr2/Tro/Lmo1/Apbb2/Nog/Ptch1/Kcnip3/Zfp451/Tcf23/Snai2/Mef2a/Eng/Myc/Rfx5/Dab2ip/Pcbp3/Sufu/Zhx1/Zfp57/Per1/Sorbs3/Ciita/Sarnp/Mad2l2/Usp2/Zfp266/Notch3	52
GO:0048762	BP	GO:0048762	mesenchymal cell differentiation	25/512	245/28943	2.32352e-12	2.89634e-10	1.82837e-10	Edn3/Has2/Wnt5a/Cyp26a1/Rbpj/Dab2/Tgfbr3/Zeb2/Osr1/Kbtbd8/Rtn4/Hif1a/Lef1/Ddx17/Sema5a/Ednrb/Nog/Tmem100/Sfrp2/Snai2/Eng/Dab2ip/Tgfb2/Fn1/Mad2l2	25
GO:0001822	BP	GO:0001822	kidney development	29/512	334/28943	2.38244e-12	2.91039e-10	1.83724e-10	Bmper/Wnt5a/Basp1/Pbx1/Arid5b/Gli3/Tiparp/Pdgfd/Nid1/Prdm1/Vcan/Osr1/Tshz3/Pcsk5/Aqp11/Ednrb/Pdgfra/Osr2/Gpc3/Nog/Adamts1/Ptch1/Zmpste24/Myc/Tgfb2/Wnt6/Ace/Lif/Notch3	29
GO:0030178	BP	GO:0030178	negative regulation of Wnt signaling pathway	21/512	168/28943	2.74696e-12	3.28989e-10	2.0768e-10	Rbms3/Wnt5a/Cthrc1/Tle4/Dab2/Gli3/Grb10/Apcdd1/Prickle1/Fzd1/Gpc3/Shisa3/Tsku/Nog/Fzd4/Sfrp4/Sfrp2/Snai2/Nkd2/Dab2ip/Mad2l2	21
GO:0061564	BP	GO:0061564	axon development	37/512	540/28943	2.93003e-12	3.44165e-10	2.17261e-10	Edn3/Lama2/Map2/Wnt5a/Cobl/Cdh11/Ccdc141/Gli3/Dclk1/Zeb2/Ank3/Ptn/Nrn1/Vim/Macf1/Slitrk3/Slit3/Ablim1/Rtn4/Sema5a/Cxcl12/Tsku/Apbb2/Nog/Ptch1/Abl1/B4galt6/Tiam2/Mark2/Tgfb2/Fn1/Ntng2/Ccr5/Mtr/Efnb3/Matn2/Notch3	37
GO:0060021	BP	GO:0060021	roof of mouth development	17/512	102/28943	3.0051e-12	3.46323e-10	2.18623e-10	Wnt5a/Arid5b/Gli3/Tiparp/Itgb8/Tgfbr3/Bnc2/Osr1/Tshz1/Lef1/Pkdcc/Asph/Fzd1/Pdgfra/Osr2/Snai2/Tgfb2	17
GO:0007409	BP	GO:0007409	axonogenesis	35/512	493/28943	4.2715e-12	4.83154e-10	3.05e-10	Edn3/Lama2/Map2/Wnt5a/Cobl/Cdh11/Ccdc141/Gli3/Dclk1/Zeb2/Ank3/Nrn1/Vim/Macf1/Slitrk3/Slit3/Ablim1/Rtn4/Sema5a/Cxcl12/Tsku/Apbb2/Nog/Ptch1/Abl1/B4galt6/Tiam2/Mark2/Tgfb2/Fn1/Ntng2/Ccr5/Efnb3/Matn2/Notch3	35
GO:0045446	BP	GO:0045446	endothelial cell differentiation	18/512	120/28943	4.40749e-12	4.85666e-10	3.06586e-10	Rbpj/Akap11/Col18a1/Col22a1/Add1/Pde2a/Heg1/Zeb1/Fzd1/Ednrb/Msn/Tmem100/Col15a1/Rdx/Cdh5/Abcb1b/Fstl1/Ppp1r16b	18
GO:0001655	BP	GO:0001655	urogenital system development	31/512	391/28943	4.45274e-12	4.85666e-10	3.06586e-10	Bmper/Wnt5a/Basp1/Pbx1/Arid5b/Gli3/Tiparp/Pdgfd/Ube3a/Nid1/Prdm1/Vcan/Osr1/Tshz3/Pcsk5/Aqp11/Igf1/Ednrb/Pdgfra/Osr2/Gpc3/Nog/Adamts1/Ptch1/Zmpste24/Myc/Tgfb2/Wnt6/Ace/Lif/Notch3	31
GO:0050678	BP	GO:0050678	regulation of epithelial cell proliferation	33/512	442/28943	4.60819e-12	4.93804e-10	3.11723e-10	Has2/Wnt5a/Rbpj/Egfr/Dab2/Col18a1/Tgfbr3/Ptn/Osr1/Rtn4/Zeb1/Atp7a/Sema5a/Aqp11/Igf1/Ednrb/Ccnd2/Osr2/Cxcl12/Gpc3/Nog/Npm1/Ptch1/Sfrp2/Snai2/Eng/Myc/Dab2ip/Prkd2/Tgfb2/Ccl2/Aplnr/Ppp1r16b	33
GO:0003158	BP	GO:0003158	endothelium development	19/512	138/28943	5.34642e-12	5.63033e-10	3.55425e-10	Stard13/Rbpj/Akap11/Col18a1/Col22a1/Add1/Pde2a/Heg1/Zeb1/Fzd1/Ednrb/Msn/Tmem100/Col15a1/Rdx/Cdh5/Abcb1b/Fstl1/Ppp1r16b	19
GO:0001667	BP	GO:0001667	ameboidal-type cell migration	34/512	471/28943	5.51596e-12	5.71042e-10	3.60481e-10	Bmper/Edn3/Has2/Pfn2/Stard13/Wnt5a/Arid5b/Col18a1/Tgfbr3/Cyp1b1/Zeb2/Ptprg/Macf1/Rtn4/Hif1a/Ccbe1/Sema5a/Igf1/Ednrb/Atp2b4/Cxcl12/Prr5l/Calca/Arsb/Abl1/Snai2/Cdh5/Dab2ip/Ago2/Prkd2/Tgfb2/Fn1/Ppm1f/Fstl1	34
GO:0072001	BP	GO:0072001	renal system development	29/512	348/28943	6.56647e-12	6.60543e-10	4.1698e-10	Bmper/Wnt5a/Basp1/Pbx1/Arid5b/Gli3/Tiparp/Pdgfd/Nid1/Prdm1/Vcan/Osr1/Tshz3/Pcsk5/Aqp11/Ednrb/Pdgfra/Osr2/Gpc3/Nog/Adamts1/Ptch1/Zmpste24/Myc/Tgfb2/Wnt6/Ace/Lif/Notch3	29
GO:0060562	BP	GO:0060562	epithelial tube morphogenesis	31/512	397/28943	6.59678e-12	6.60543e-10	4.1698e-10	Stard13/Wnt5a/Cobl/Cthrc1/Rbpj/Pbx1/Gli3/Zeb2/Dlc1/Osr1/Prickle1/Hif1a/Lef1/Sema5a/Fzd1/Igf1/Pdgfra/Cxcl12/Gpc3/Areg/Nog/Ptch1/Sfrp2/Abl1/Eng/Myc/Sufu/Tgfb2/Wnt6/Aplnr/Shank3	31
GO:0030029	BP	GO:0030029	actin filament-based process	46/512	822/28943	7.54634e-12	7.43436e-10	4.69308e-10	Racgap1/Pfn2/Ect2/Stard13/Add3/Cobl/Cacna2d1/Elmo1/Frmd6/Akap11/Pard3/Palld/Dlc1/Add1/Cnn3/Synpo/Nedd9/Arrb1/Abi2/Fgd1/Shroom4/Epdr1/Spire1/Wasf3/Synpo2/Shroom2/Sema5a/Pdgfra/Gas7/Ppm1e/Kirrel/Zbed3/Rdx/Tmod2/Scin/Abl1/Mef2a/Farp2/Tgfb2/Ppm1f/Sorbs3/Mad2l2/Fscn1/Kank4/Inf2/Shank3	46
GO:0010631	BP	GO:0010631	epithelial cell migration	28/512	328/28943	8.59403e-12	8.33211e-10	5.2598e-10	Bmper/Has2/Pfn2/Stard13/Wnt5a/Col18a1/Tgfbr3/Cyp1b1/Zeb2/Ptprg/Macf1/Rtn4/Hif1a/Ccbe1/Sema5a/Igf1/Atp2b4/Cxcl12/Calca/Arsb/Abl1/Snai2/Cdh5/Dab2ip/Prkd2/Tgfb2/Ppm1f/Fstl1	28
GO:0030036	BP	GO:0030036	actin cytoskeleton organization	43/512	737/28943	9.9167e-12	9.3352e-10	5.89302e-10	Racgap1/Pfn2/Ect2/Stard13/Add3/Cobl/Elmo1/Frmd6/Akap11/Palld/Dlc1/Add1/Cnn3/Synpo/Nedd9/Arrb1/Abi2/Fgd1/Shroom4/Spire1/Wasf3/Synpo2/Shroom2/Sema5a/Pdgfra/Gas7/Ppm1e/Kirrel/Zbed3/Rdx/Tmod2/Scin/Abl1/Mef2a/Farp2/Tgfb2/Ppm1f/Sorbs3/Mad2l2/Fscn1/Kank4/Inf2/Shank3	43
GO:0090132	BP	GO:0090132	epithelium migration	28/512	330/28943	9.93432e-12	9.3352e-10	5.89302e-10	Bmper/Has2/Pfn2/Stard13/Wnt5a/Col18a1/Tgfbr3/Cyp1b1/Zeb2/Ptprg/Macf1/Rtn4/Hif1a/Ccbe1/Sema5a/Igf1/Atp2b4/Cxcl12/Calca/Arsb/Abl1/Snai2/Cdh5/Dab2ip/Prkd2/Tgfb2/Ppm1f/Fstl1	28
GO:0090130	BP	GO:0090130	tissue migration	28/512	332/28943	1.14708e-11	1.06157e-09	6.70134e-10	Bmper/Has2/Pfn2/Stard13/Wnt5a/Col18a1/Tgfbr3/Cyp1b1/Zeb2/Ptprg/Macf1/Rtn4/Hif1a/Ccbe1/Sema5a/Igf1/Atp2b4/Cxcl12/Calca/Arsb/Abl1/Snai2/Cdh5/Dab2ip/Prkd2/Tgfb2/Ppm1f/Fstl1	28
GO:0010562	BP	GO:0010562	positive regulation of phosphorus metabolic process	49/512	929/28943	1.24454e-11	1.11789e-09	7.05688e-10	Edn3/Zbtb20/Pfn2/Ect2/Vav3/Wnt5a/Egfr/Dab2/Akap11/Cd36/Hgf/Pdgfd/Pid1/Zeb2/Dlc1/Grb10/Caprin2/Nedd9/Arrb1/Abi2/Gprc5b/Fzd1/Igf1/Ednrb/Pdgfra/Ccnd2/Atp2b4/Ptprc/Areg/Prr5l/Npm1/Fzd4/Pcx/Calca/Sfrp2/Abl1/Cdh5/Eng/Myc/Pth1r/Dab2ip/Prkd2/Tgfb2/Ace/Tpx2/Mad2l2/Aplnr/Lif/Ppp1r16b	49
GO:0045937	BP	GO:0045937	positive regulation of phosphate metabolic process	49/512	929/28943	1.24454e-11	1.11789e-09	7.05688e-10	Edn3/Zbtb20/Pfn2/Ect2/Vav3/Wnt5a/Egfr/Dab2/Akap11/Cd36/Hgf/Pdgfd/Pid1/Zeb2/Dlc1/Grb10/Caprin2/Nedd9/Arrb1/Abi2/Gprc5b/Fzd1/Igf1/Ednrb/Pdgfra/Ccnd2/Atp2b4/Ptprc/Areg/Prr5l/Npm1/Fzd4/Pcx/Calca/Sfrp2/Abl1/Cdh5/Eng/Myc/Pth1r/Dab2ip/Prkd2/Tgfb2/Ace/Tpx2/Mad2l2/Aplnr/Lif/Ppp1r16b	49
GO:0097435	BP	GO:0097435	supramolecular fiber organization	45/512	807/28943	1.45331e-11	1.28649e-09	8.12123e-10	Col14a1/Pfn2/Map2/Add3/Cobl/Elmo1/Cd36/Cyp1b1/Mid1/Dlc1/Add1/Col11a1/Synpo/Vim/Nedd9/Arrb1/Abi2/Shroom4/Spire1/Wasf3/Synpo2/Shroom2/Atp7a/Sema5a/Pdgfra/Gas7/Ppm1e/Kirrel/Zbed3/Rdx/Tmod2/Scin/Sfrp2/Abl1/Cdh5/Slk/Mef2a/Tgfb2/Ppm1f/Sorbs3/Tpx2/Mad2l2/Fscn1/Kank4/Shank3	45
GO:0030855	BP	GO:0030855	epithelial cell differentiation	42/512	730/28943	2.7118e-11	2.36624e-09	1.49373e-09	Wnt5a/Basp1/Lamc1/Rbpj/Frmd6/Fst/Dab2/Akap11/Col18a1/Clock/Zeb2/Pard3/Palld/Col22a1/Add1/Pde2a/Heg1/Prdm1/Vim/Osr1/Hif1a/Abi2/Lef1/Zeb1/Alg10b/Slc4a7/Fzd1/Igf1/Ednrb/Msn/Tmem100/Col15a1/Sfrp4/Ptch1/Rdx/Abl1/Cdh5/Tgfb2/Abcb1b/Fstl1/Lif/Ppp1r16b	42
GO:0007423	BP	GO:0007423	sensory organ development	39/512	644/28943	3.16628e-11	2.7239e-09	1.71951e-09	Rorb/Bmper/Tenm3/Wnt5a/Cthrc1/Rbpj/Pbx1/Egfr/Gli3/Cyp1b1/Zeb2/Rcn1/Ptn/Col11a1/Lin7a/Ndp/Bnc2/Prdm1/Vim/Osr1/Tshz1/Hif1a/Abi2/Lef1/Zeb1/Alg10b/Slc4a7/Shroom2/Igf1/Pdgfra/Crybg3/Osr2/Tsku/Nog/Fzd4/Myc/Smoc1/Tgfb2/Lif	39
GO:0090090	BP	GO:0090090	negative regulation of canonical Wnt signaling pathway	18/512	135/28943	3.36283e-11	2.8528e-09	1.80088e-09	Rbms3/Wnt5a/Cthrc1/Tle4/Dab2/Gli3/Prickle1/Fzd1/Gpc3/Shisa3/Nog/Fzd4/Sfrp4/Sfrp2/Snai2/Nkd2/Dab2ip/Mad2l2	18
GO:0003007	BP	GO:0003007	heart morphogenesis	25/512	283/28943	5.47153e-11	4.57809e-09	2.89001e-09	Has2/Wnt5a/Rbpj/Tgfbr3/Dlc1/Col11a1/Mdm4/Heg1/Slit3/Rtn4/Hif1a/Kat6a/Fzd1/Nog/Tmem100/Zmiz1/Adamts1/Ptch1/Sfrp2/Snai2/Zmpste24/Eng/Sufu/Tgfb2/Aplnr	25
GO:0048589	BP	GO:0048589	developmental growth	44/512	819/28943	8.20617e-11	6.77342e-09	4.27585e-09	Col14a1/Edn3/Map2/Wnt5a/Cobl/Rbpj/Hopx/Arid5b/Gli3/Ube3a/Tgfbr3/Dclk1/Zeb2/Add1/Ptn/Nrn1/Bnc2/Heg1/Macf1/Cpne5/Slit3/Rtn4/Pkdcc/Sema5a/Igf1/Pdgfra/Ccnd2/Cxcl12/Areg/Nog/Brd4/Zmiz1/Ptch1/Sfrp2/Ptx3/Abl1/Zmpste24/Rgs2/Gamt/Tgfb2/Fn1/Rnf157/Ccr5/Cpne1	44
GO:0040008	BP	GO:0040008	regulation of growth	41/512	735/28943	1.20889e-10	9.84519e-09	6.21496e-09	Col14a1/Map2/Wnt5a/Rbpj/Hopx/Egfr/Dab2/Tgfbr3/Caprin2/Nedd9/Cd38/Smarca2/Macf1/Cpne5/Slit3/Rtn4/Hif1a/Sema5a/Igf1/Ccnd2/Tro/Cxcl12/Gpc3/Nog/Extl3/Npm1/Wrn/Ptch1/Clstn1/Sfrp2/Abl1/Zmpste24/Rgs2/Dab2ip/Gamt/Tgfb2/Fn1/Ppm1f/Rnf157/Ccr5/Mad2l2	41
GO:0072132	BP	GO:0072132	mesenchyme morphogenesis	12/512	55/28943	1.81805e-10	1.46114e-08	9.2237e-09	Wnt5a/Rbpj/Mdm4/Osr1/Lef1/Nog/Tmem100/Snai2/Eng/Myc/Tgfb2/Aplnr	12
GO:0003231	BP	GO:0003231	cardiac ventricle development	18/512	152/28943	2.47581e-10	1.96393e-08	1.23977e-08	Wnt5a/Rbpj/Tgfbr3/Col11a1/Pde2a/Mdm4/Heg1/Prdm1/Slit3/Hif1a/Fzd1/Nog/Sfrp2/Zmpste24/Eng/Sufu/Tgfb2/Aplnr	18
GO:0016049	BP	GO:0016049	cell growth	34/512	544/28943	2.65757e-10	2.08109e-08	1.31372e-08	Col14a1/Edn3/Map2/Wnt5a/Cobl/Egfr/Dab2/Dclk1/Zeb2/Nrn1/Caprin2/Cd38/Smarca2/Macf1/Cpne5/Slit3/Rtn4/Sema5a/Igf1/Tro/Cxcl12/Extl3/Npm1/Clstn1/Sfrp2/Abl1/Rgs2/Dab2ip/Tgfb2/Fn1/Rnf157/Ccr5/Cpne1/Mad2l2	34
GO:0032880	BP	GO:0032880	regulation of protein localization	47/512	949/28943	2.72751e-10	2.10881e-08	1.33123e-08	Bmper/Gnai1/Map2/Ect2/Wnt5a/Egfr/Dab2/Gli3/Cd36/Clock/Pid1/Gpc6/Dclk1/Kcnab2/Ank3/Ptn/Cd38/Dclk2/Tcaf1/Arrb1/Rtn4/Hif1a/Xpo1/Pkdcc/Mfhas1/Asph/Tex15/Igf1/Abat/Ano1/Atp2b4/Msn/Gpc3/Tcaf2/Prr5l/Npm1/Dzip1/Ptch1/Rdx/C2cd5/Zdhhc2/Nkd2/Tgfb2/Ccl2/Ppm1f/Lif/Shank3	47
GO:0001837	BP	GO:0001837	epithelial to mesenchymal transition	18/512	155/28943	3.42349e-10	2.61383e-08	1.65003e-08	Has2/Wnt5a/Rbpj/Dab2/Tgfbr3/Kbtbd8/Rtn4/Hif1a/Lef1/Ddx17/Nog/Tmem100/Sfrp2/Snai2/Eng/Dab2ip/Tgfb2/Mad2l2	18
GO:0030510	BP	GO:0030510	regulation of BMP signaling pathway	15/512	104/28943	4.7809e-10	3.60515e-08	2.27582e-08	Bmper/Wnt5a/Rbpj/Fst/Tgfbr3/Fzd1/Gpc3/Nog/Sfrp4/Sfrp2/Abl1/Cdh5/Eng/Zfp423/Fstl1	15
GO:0003205	BP	GO:0003205	cardiac chamber development	20/512	199/28943	4.86803e-10	3.62609e-08	2.28904e-08	Wnt5a/Rbpj/Tgfbr3/Col11a1/Pde2a/Mdm4/Heg1/Prdm1/Slit3/Hif1a/Pcsk5/Fzd1/Nog/Adamts1/Sfrp2/Zmpste24/Eng/Sufu/Tgfb2/Aplnr	20
GO:0061061	BP	GO:0061061	muscle structure development	40/512	741/28943	5.36495e-10	3.94808e-08	2.4923e-08	Col14a1/Lama2/Wnt5a/Lamc1/Rbpj/Hopx/Arid5b/Tgfbr3/Nid1/Atp11a/Col11a1/Zbtb18/Heg1/Smarca2/Prickle1/Tshz3/Lef1/Zeb1/Ddx17/Adamts15/Fzd1/Igf1/Ednrb/Pdgfra/Ccnd2/Myof/Cxcl12/Nog/Tmod2/Tcf23/Zmpste24/Mef2a/Eng/Myc/Rgs2/Tgfb2/Spag9/Usp2/Aplnr/Lif	40
GO:0001885	BP	GO:0001885	endothelial cell development	13/512	74/28943	5.5929e-10	4.06684e-08	2.56727e-08	Akap11/Col18a1/Col22a1/Add1/Pde2a/Heg1/Ednrb/Msn/Col15a1/Rdx/Cdh5/Abcb1b/Ppp1r16b	13
GO:0002064	BP	GO:0002064	epithelial cell development	22/512	245/28943	5.77422e-10	4.14929e-08	2.61932e-08	Wnt5a/Frmd6/Akap11/Col18a1/Clock/Pard3/Palld/Col22a1/Add1/Pde2a/Heg1/Prdm1/Vim/Hif1a/Abi2/Ednrb/Msn/Col15a1/Rdx/Cdh5/Abcb1b/Ppp1r16b	22
GO:0042327	BP	GO:0042327	positive regulation of phosphorylation	43/512	843/28943	6.71127e-10	4.76657e-08	3.00898e-08	Edn3/Zbtb20/Pfn2/Ect2/Vav3/Wnt5a/Egfr/Dab2/Akap11/Cd36/Hgf/Pdgfd/Zeb2/Grb10/Caprin2/Nedd9/Arrb1/Abi2/Gprc5b/Fzd1/Igf1/Ednrb/Pdgfra/Ccnd2/Atp2b4/Ptprc/Areg/Prr5l/Npm1/Fzd4/Calca/Sfrp2/Abl1/Eng/Myc/Dab2ip/Prkd2/Tgfb2/Ace/Tpx2/Mad2l2/Aplnr/Lif	43
GO:0045766	BP	GO:0045766	positive regulation of angiogenesis	19/512	182/28943	6.94515e-10	4.82056e-08	3.04307e-08	Jak1/Bmper/Wnt5a/Hgf/Itgb8/Cyp1b1/Add1/Rtn4/Hif1a/Ccbe1/Sema5a/Ddah1/Sfrp2/Abl1/Cdh5/Eng/Ago2/Prkd2/Aplnr	19
GO:1904018	BP	GO:1904018	positive regulation of vasculature development	19/512	182/28943	6.94515e-10	4.82056e-08	3.04307e-08	Jak1/Bmper/Wnt5a/Hgf/Itgb8/Cyp1b1/Add1/Rtn4/Hif1a/Ccbe1/Sema5a/Ddah1/Sfrp2/Abl1/Cdh5/Eng/Ago2/Prkd2/Aplnr	19
GO:0010632	BP	GO:0010632	regulation of epithelial cell migration	22/512	248/28943	7.27392e-10	4.99203e-08	3.15131e-08	Bmper/Has2/Pfn2/Stard13/Wnt5a/Col18a1/Tgfbr3/Ptprg/Macf1/Rtn4/Hif1a/Ccbe1/Sema5a/Igf1/Atp2b4/Arsb/Abl1/Snai2/Dab2ip/Prkd2/Tgfb2/Ppm1f	22
GO:0044087	BP	GO:0044087	regulation of cellular component biogenesis	47/512	983/28943	8.55404e-10	5.80534e-08	3.66473e-08	Has2/Pfn2/Map2/Ect2/Wnt5a/Add3/Cobl/Hopx/Cd36/Selp/Gpc6/Fez1/Dlc1/Add1/Lrrn1/Synpo/Macf1/Slitrk3/Abi2/Pcsk5/Synpo2/Atp7a/Myo10/Fzd1/Msn/Ppm1e/Npm1/Kirrel/Dzip1/Rdx/Tmod2/Clstn1/Scin/Abl1/Snai2/Cdh5/Slk/Farp2/Dab2ip/Ppm1f/Ntng2/Ace/Sorbs3/Fscn1/Aplnr/Kank4/Shank3	47
GO:0007420	BP	GO:0007420	brain development	38/512	692/28943	9.17838e-10	6.16061e-08	3.889e-08	Wnt5a/Rbpj/Pbx1/Ccdc141/Egfr/Gli3/Dclk1/Zeb2/Dlc1/Zbtb18/Btbd3/Dclk2/Rtn4/Hif1a/Lef1/Shroom4/B3gnt5/Slc4a7/Shroom2/Atp7a/Rbfox2/Sema5a/Igf1/Cxcl12/Tsku/Nog/Fzd4/Zmiz1/Ptch1/Sfrp2/Abl1/Zfp423/Dab2ip/Fut10/Eml1/Tacc1/Notch3/Shank3	38
GO:0071772	BP	GO:0071772	response to BMP	19/512	187/28943	1.10065e-09	7.2288e-08	4.56331e-08	Bmper/Wnt5a/Rbpj/Fst/Tgfbr3/Lef1/Kcnd3/Fzd1/Gpc3/Nog/Tmem100/Sfrp4/Sfrp2/Abl1/Cdh5/Eng/Zfp423/Tgfb2/Fstl1	19
GO:0071773	BP	GO:0071773	cellular response to BMP stimulus	19/512	187/28943	1.10065e-09	7.2288e-08	4.56331e-08	Bmper/Wnt5a/Rbpj/Fst/Tgfbr3/Lef1/Kcnd3/Fzd1/Gpc3/Nog/Tmem100/Sfrp4/Sfrp2/Abl1/Cdh5/Eng/Zfp423/Tgfb2/Fstl1	19
GO:0007015	BP	GO:0007015	actin filament organization	30/512	460/28943	1.13559e-09	7.3789e-08	4.65807e-08	Pfn2/Add3/Cobl/Elmo1/Dlc1/Add1/Synpo/Nedd9/Arrb1/Abi2/Shroom4/Spire1/Wasf3/Synpo2/Shroom2/Sema5a/Gas7/Ppm1e/Kirrel/Zbed3/Rdx/Tmod2/Scin/Abl1/Ppm1f/Sorbs3/Mad2l2/Fscn1/Kank4/Shank3	30
GO:0007178	BP	GO:0007178	transmembrane receptor protein serine/threonine kinase signaling pathway	28/512	407/28943	1.25868e-09	8.09263e-08	5.10863e-08	Bmper/Wnt5a/Rbpj/Fst/Dab2/Itgb8/Tgfbr3/Zeb2/Vim/Lef1/Zeb1/Fzd1/Gpc3/Tsku/Nog/Tmem100/Zmiz1/Sfrp4/Zfyve9/Sfrp2/Zfp451/Abl1/Cdh5/Eng/Zfp423/Tgfb2/Ccl2/Fstl1	28
GO:0060317	BP	GO:0060317	cardiac epithelial to mesenchymal transition	9/512	30/28943	1.62665e-09	1.03495e-07	6.53334e-08	Has2/Rbpj/Tgfbr3/Rtn4/Nog/Tmem100/Snai2/Eng/Tgfb2	9
GO:0034329	BP	GO:0034329	cell junction assembly	29/512	445/28943	2.1957e-09	1.38261e-07	8.728e-08	Ect2/Wnt5a/Lamc1/Cdh11/Hopx/Gpc6/Pard3/Dlc1/Lrrn1/Heg1/Cdh10/Macf1/Arvcf/Slitrk3/Abi2/Fzd1/Clstn1/Abl1/Snai2/Cdh5/Slk/Fn1/Ppm1f/Ntng2/Ace/Fbf1/Fscn1/Aplnr/Shank3	29
GO:0030509	BP	GO:0030509	BMP signaling pathway	18/512	176/28943	2.71932e-09	1.69486e-07	1.06991e-07	Bmper/Wnt5a/Rbpj/Fst/Tgfbr3/Lef1/Fzd1/Gpc3/Nog/Tmem100/Sfrp4/Sfrp2/Abl1/Cdh5/Eng/Zfp423/Tgfb2/Fstl1	18
GO:0006935	BP	GO:0006935	chemotaxis	35/512	630/28943	3.20474e-09	1.97723e-07	1.24816e-07	Edn3/Lama2/Vav3/Wnt5a/Ccdc141/Gli3/Hgf/Pdgfd/Ank3/Ptn/Ccr2/Xcl1/Camk1d/Slit3/Ablim1/Lef1/Sema5a/Ednrb/Pdgfra/Cxcl12/Apbb2/Nog/Ptch1/Calca/Snai2/Eng/Prkd2/Tgfb2/Fn1/Ccl2/Ppm1f/Ccr5/Efnb3/Matn2/Notch3	35
GO:0031589	BP	GO:0031589	cell-substrate adhesion	26/512	371/28943	3.35932e-09	2.0345e-07	1.28431e-07	Has2/Lamc1/Dab2/Cd36/Itgb8/Vit/Nid1/Dlc1/Ptn/Abi3bp/Nedd9/Macf1/Col26a1/Egflam/Sned1/Epdr1/Pcsk5/Spock2/Fzd4/Abl1/Slk/Smoc1/Fn1/Ppm1f/Ntng2/Sorbs3	26
GO:0010811	BP	GO:0010811	positive regulation of cell-substrate adhesion	16/512	138/28943	3.36418e-09	2.0345e-07	1.28431e-07	Has2/Dab2/Cd36/Vit/Nid1/Ptn/Abi3bp/Nedd9/Col26a1/Egflam/Pcsk5/Spock2/Abl1/Smoc1/Fn1/Ppm1f	16
GO:0008347	BP	GO:0008347	glial cell migration	12/512	70/28943	3.46665e-09	2.06155e-07	1.30139e-07	Gli3/Apcdd1/Ccr2/Vcan/Vim/Rtn4/Zmiz1/Dab2ip/Tgfb2/Fn1/Ccl2/Matn2	12
GO:0042330	BP	GO:0042330	taxis	35/512	632/28943	3.47642e-09	2.06155e-07	1.30139e-07	Edn3/Lama2/Vav3/Wnt5a/Ccdc141/Gli3/Hgf/Pdgfd/Ank3/Ptn/Ccr2/Xcl1/Camk1d/Slit3/Ablim1/Lef1/Sema5a/Ednrb/Pdgfra/Cxcl12/Apbb2/Nog/Ptch1/Calca/Snai2/Eng/Prkd2/Tgfb2/Fn1/Ccl2/Ppm1f/Ccr5/Efnb3/Matn2/Notch3	35
GO:0001838	BP	GO:0001838	embryonic epithelial tube formation	17/512	159/28943	3.81225e-09	2.23897e-07	1.41339e-07	Wnt5a/Cobl/Cthrc1/Zeb2/Dlc1/Osr1/Prickle1/Hif1a/Fzd1/Nog/Ptch1/Sfrp2/Abl1/Sufu/Tgfb2/Wnt6/Shank3	17
GO:0001934	BP	GO:0001934	positive regulation of protein phosphorylation	39/512	762/28943	3.93812e-09	2.29086e-07	1.44615e-07	Edn3/Pfn2/Ect2/Wnt5a/Egfr/Dab2/Akap11/Cd36/Hgf/Pdgfd/Zeb2/Caprin2/Nedd9/Arrb1/Abi2/Gprc5b/Fzd1/Igf1/Ednrb/Pdgfra/Ccnd2/Atp2b4/Ptprc/Areg/Prr5l/Npm1/Fzd4/Calca/Sfrp2/Abl1/Eng/Dab2ip/Prkd2/Tgfb2/Ace/Tpx2/Mad2l2/Aplnr/Lif	39
GO:0030177	BP	GO:0030177	positive regulation of Wnt signaling pathway	16/512	140/28943	4.15545e-09	2.385e-07	1.50557e-07	Wnt5a/Rbpj/Egfr/Dab2/Zeb2/Caprin2/Macf1/Lef1/Gprc5b/Sema5a/Gpc3/Tnks/Sfrp4/Zbed3/Sfrp2/Abl1	16
GO:0010810	BP	GO:0010810	regulation of cell-substrate adhesion	20/512	225/28943	4.17804e-09	2.385e-07	1.50557e-07	Has2/Dab2/Cd36/Vit/Nid1/Dlc1/Ptn/Abi3bp/Nedd9/Macf1/Col26a1/Egflam/Pcsk5/Spock2/Fzd4/Abl1/Slk/Smoc1/Fn1/Ppm1f	20
GO:0090092	BP	GO:0090092	regulation of transmembrane receptor protein serine/threonine kinase signaling pathway	22/512	273/28943	4.37935e-09	2.46387e-07	1.55536e-07	Bmper/Wnt5a/Rbpj/Fst/Dab2/Tgfbr3/Zeb2/Zeb1/Fzd1/Gpc3/Tsku/Nog/Sfrp4/Zfyve9/Sfrp2/Zfp451/Abl1/Cdh5/Eng/Zfp423/Tgfb2/Fstl1	22
GO:0001763	BP	GO:0001763	morphogenesis of a branching structure	21/512	249/28943	4.39689e-09	2.46387e-07	1.55536e-07	Wnt5a/Pbx1/Gli3/Hgf/Prdm1/Rtn4/Lef1/Sema5a/Igf1/Pdgfra/Cxcl12/Gpc3/Areg/Nog/Ptch1/Sfrp2/Abl1/Snai2/Eng/Myc/Wnt6	21
GO:0003281	BP	GO:0003281	ventricular septum development	13/512	88/28943	5.12265e-09	2.84447e-07	1.79562e-07	Wnt5a/Rbpj/Tgfbr3/Pde2a/Mdm4/Heg1/Prdm1/Slit3/Fzd1/Nog/Sufu/Tgfb2/Aplnr	13
GO:0051098	BP	GO:0051098	regulation of binding	27/512	408/28943	5.71651e-09	3.14562e-07	1.98573e-07	Runx1t1/Map2/Wnt5a/Cthrc1/Hopx/Dab2/Tgfbr3/Add1/Caprin2/Hmbox1/Arrb1/Lef1/Igf1/Nog/Brd4/Tnks/Dzip1/Spon1/Abl1/Zmpste24/Myc/Mark2/Tgfb2/Ace/Cpne1/Mad2l2/Lif	27
GO:0035148	BP	GO:0035148	tube formation	18/512	185/28943	6.03138e-09	3.28926e-07	2.07641e-07	Wnt5a/Cobl/Cthrc1/Zeb2/Dlc1/Osr1/Prickle1/Hif1a/Fzd1/Nog/Ptch1/Sfrp2/Abl1/Dab2ip/Sufu/Tgfb2/Wnt6/Shank3	18
GO:0009100	BP	GO:0009100	glycoprotein metabolic process	25/512	355/28943	6.11856e-09	3.30727e-07	2.08778e-07	Col11a1/Mamdc2/Uggt2/Egflam/Hif1a/B3gnt5/Alg10b/St8sia4/Atp7a/St3gal1/Aqp11/Igf1/Tmtc1/Itm2a/Spock2/Extl3/Arsb/Ptx3/St6galnac4/Ago2/Ggta1/Poglut1/Fut10/Galnt1/Gfpt2	25
GO:0010720	BP	GO:0010720	positive regulation of cell development	26/512	384/28943	6.86044e-09	3.67575e-07	2.32039e-07	Has2/Dab2/Gli3/Mme/Akap11/Zeb2/Add1/Ptn/Caprin2/Vim/Nedd9/Macf1/Rtn4/Hif1a/Sema5a/Igf1/Cxcl12/Nog/Abl1/Cdh5/Tiam2/Myc/Fn1/Ace/Lif/Shank3	26
GO:0050679	BP	GO:0050679	positive regulation of epithelial cell proliferation	20/512	232/28943	7.06776e-09	3.7539e-07	2.36972e-07	Has2/Wnt5a/Rbpj/Egfr/Col18a1/Ptn/Osr1/Rtn4/Atp7a/Sema5a/Igf1/Ccnd2/Osr2/Cxcl12/Nog/Myc/Prkd2/Ccl2/Aplnr/Ppp1r16b	20
GO:0045596	BP	GO:0045596	negative regulation of cell differentiation	38/512	746/28943	7.13245e-09	3.7556e-07	2.37079e-07	Rorb/Runx1t1/Map2/Wnt5a/Rbpj/Pbx1/Hopx/Fst/Egfr/Gli3/Tgfbr3/Ptn/Osr1/Smarca2/Prickle1/Rtn4/Zeb1/Sema5a/Igf1/Ednrb/Ccnd2/Tsku/Areg/Nog/Abca5/Ptch1/Calca/Sfrp2/Tcf23/Snai2/Myc/Rgs2/Dab2ip/Tgfb2/Ccr5/Mad2l2/Efnb3/Notch3	38
GO:0031346	BP	GO:0031346	positive regulation of cell projection organization	28/512	441/28943	7.35639e-09	3.84041e-07	2.42433e-07	Tenm3/Wnt5a/Cobl/Hgf/Zeb2/Fez1/Ptn/Caprin2/Macf1/Camk1d/Abi2/Gprc5b/Atp7a/Sema5a/Fzd1/Cxcl12/Fzd4/Adamts1/Dzip1/Arsb/Abl1/Tiam2/Mark2/Rgs2/Dab2ip/Fn1/Fscn1/Lif	28
GO:0003279	BP	GO:0003279	cardiac septum development	15/512	128/28943	8.98328e-09	4.64999e-07	2.93539e-07	Wnt5a/Rbpj/Tgfbr3/Pde2a/Mdm4/Heg1/Prdm1/Slit3/Pcsk5/Fzd1/Nog/Eng/Sufu/Tgfb2/Aplnr	15
GO:0034762	BP	GO:0034762	regulation of transmembrane transport	34/512	627/28943	9.86432e-09	5.06313e-07	3.1962e-07	Edn3/Kcnd2/Cacna2d1/Kcnab1/Pid1/Kcnab2/Ank3/Grb10/Ccr2/Slc43a2/Osr1/Tcaf1/Asph/Kcnd3/Atp7a/Igf1/Atp2b4/Gpc3/Tcaf2/Cacng4/Kcnip3/Calca/Abl1/C2cd5/Mef2a/Myc/Rgs2/Tgfb2/Ccl2/Ace/Abcb1b/Atp1b1/Aplnr/Shank3	34
GO:0022604	BP	GO:0022604	regulation of cell morphogenesis	24/512	338/28943	1.05137e-08	5.32603e-07	3.36215e-07	Has2/Wnt5a/Dab2/Dlc1/Ptn/Caprin2/Nedd9/Macf1/Cpne5/Fgd1/Coch/Wasf3/Myo10/Msn/Gas7/Fzd4/Rdx/Abl1/Zmpste24/Mark2/Fn1/Ccl2/Ntng2/Rnf157	24
GO:0072175	BP	GO:0072175	epithelial tube formation	17/512	170/28943	1.05509e-08	5.32603e-07	3.36215e-07	Wnt5a/Cobl/Cthrc1/Zeb2/Dlc1/Osr1/Prickle1/Hif1a/Fzd1/Nog/Ptch1/Sfrp2/Abl1/Sufu/Tgfb2/Wnt6/Shank3	17
GO:0045216	BP	GO:0045216	cell-cell junction organization	19/512	219/28943	1.51598e-08	7.58986e-07	4.79124e-07	Ect2/Cdh11/Hopx/Pard3/Add1/Heg1/Cdh10/Arvcf/Abi2/Shroom2/Kirrel/Rdx/Snai2/Cdh5/Tgfb2/Ace/Fbf1/Fscn1/Aplnr	19
GO:0060284	BP	GO:0060284	regulation of cell development	33/512	608/28943	1.59887e-08	7.93974e-07	5.01211e-07	Has2/Map2/Wnt5a/Dab2/Gli3/Mme/Akap11/Clock/Zeb2/Add1/Ptn/Caprin2/Vim/Nedd9/Macf1/Rtn4/Hif1a/Lef1/Sema5a/Igf1/Ednrb/Cxcl12/Nog/Abl1/Cdh5/Tiam2/Myc/Fn1/Ace/Ccr5/Efnb3/Lif/Shank3	33
GO:0043269	BP	GO:0043269	regulation of ion transport	38/512	771/28943	1.71279e-08	8.43689e-07	5.32595e-07	Edn3/Kcnd2/Cacna2d1/Nkain1/Kcnab1/Kcnab2/Spink1/Ank3/Ccr2/Slc43a2/Osr1/Tcaf1/Rtn4/Asph/Kcnd3/Atp7a/Igf1/Abat/Atp2b4/Cxcl12/Tcaf2/Cacng4/Sfrp4/Kcnip3/Calca/Abl1/Maob/Rgs2/Syt15/Tgfb2/Ccl2/Ace/Abcb1b/Per1/Usp2/Atp1b1/Aplnr/Shank3	38
GO:0001558	BP	GO:0001558	regulation of cell growth	28/512	459/28943	1.74003e-08	8.5025e-07	5.36736e-07	Col14a1/Map2/Wnt5a/Egfr/Dab2/Caprin2/Cd38/Smarca2/Macf1/Cpne5/Slit3/Rtn4/Sema5a/Igf1/Tro/Cxcl12/Extl3/Npm1/Clstn1/Sfrp2/Abl1/Rgs2/Dab2ip/Tgfb2/Fn1/Rnf157/Ccr5/Mad2l2	28
GO:0008285	BP	GO:0008285	negative regulation of cell population proliferation	38/512	774/28943	1.89718e-08	9.1968e-07	5.80565e-07	Wnt5a/Rbpj/Rgs5/Dab2/Gli3/4930503L19Rik/Tgfbr3/Cyp1b1/Ppp2r5c/Dlc1/Ptn/Abi3bp/Smarca2/Slit3/Zeb1/Asph/Aqp11/Igf1/Ddah1/Cxcl12/Gpc3/Nog/Npm1/Sfrp4/Ptch1/Scin/Sfrp2/Snai2/Cdh5/Eng/Myc/Pth1r/Dab2ip/Tgfb2/Ccl2/Ccr5/Slfn3/Lif	38
GO:0060840	BP	GO:0060840	artery development	14/512	116/28943	1.91899e-08	9.22931e-07	5.82617e-07	Rbpj/Gli3/Pde2a/Prdm1/Prickle1/Rtn4/Kat6a/Nog/Zmiz1/Eng/Sufu/Tgfb2/Aplnr/Notch3	14
GO:0048588	BP	GO:0048588	developmental cell growth	21/512	273/28943	2.22028e-08	1.05949e-06	6.68823e-07	Col14a1/Edn3/Map2/Wnt5a/Cobl/Dclk1/Zeb2/Nrn1/Macf1/Cpne5/Slit3/Rtn4/Sema5a/Igf1/Cxcl12/Abl1/Rgs2/Fn1/Rnf157/Ccr5/Cpne1	21
GO:0022407	BP	GO:0022407	regulation of cell-cell adhesion	29/512	497/28943	2.55542e-08	1.20996e-06	7.63812e-07	Jak1/Has2/Tenm3/Wnt5a/Gli3/Selp/Magi1/Ank3/Adam19/Ccr2/Smarca2/Xcl1/Lef1/Myo10/Igf1/Abat/Ptprc/Cxcl12/Chst2/Zmiz1/Rdx/Abl1/Zdhhc2/Ccl2/Ppm1f/Ccr5/Mad2l2/Efnb3/Cd83	29
GO:0014020	BP	GO:0014020	primary neural tube formation	14/512	119/28943	2.67074e-08	1.25484e-06	7.92139e-07	Wnt5a/Cobl/Cthrc1/Zeb2/Dlc1/Prickle1/Hif1a/Fzd1/Nog/Ptch1/Sfrp2/Abl1/Sufu/Tgfb2	14
GO:0051960	BP	GO:0051960	regulation of nervous system development	31/512	562/28943	3.04654e-08	1.40972e-06	8.89909e-07	Map2/Wnt5a/Gli3/Mme/Hgf/Zeb2/Pard3/Ptn/Lrrn1/Caprin2/Vim/Jam2/Macf1/Slitrk3/Rtn4/Hif1a/Lef1/Wasf3/Sema5a/Igf1/Cxcl12/Nog/Clstn1/Tiam2/Myc/Fn1/Ace/Ccr5/Efnb3/Lif/Shank3	31
GO:0090066	BP	GO:0090066	regulation of anatomical structure size	31/512	562/28943	3.04654e-08	1.40972e-06	8.89909e-07	Edn3/Pfn2/Map2/Wnt5a/Add3/Tgfbr3/Add1/Cd38/Macf1/Rtn4/Hif1a/Shroom2/Atp7a/Sema5a/Aqp11/Ednrb/Cxcl12/Npm1/Kirrel/Rdx/Calca/Tmod2/Scin/Abl1/Rgs2/Fn1/Ace/Ccr5/Kank4/Inf2/Shank3	31
GO:0061138	BP	GO:0061138	morphogenesis of a branching epithelium	19/512	229/28943	3.11992e-08	1.4224e-06	8.97916e-07	Wnt5a/Pbx1/Gli3/Hgf/Lef1/Sema5a/Igf1/Pdgfra/Cxcl12/Gpc3/Areg/Nog/Ptch1/Sfrp2/Abl1/Snai2/Eng/Myc/Wnt6	19
GO:0072006	BP	GO:0072006	nephron development	16/512	161/28943	3.12052e-08	1.4224e-06	8.97916e-07	Basp1/Pbx1/Gli3/Pdgfd/Nid1/Osr1/Aqp11/Ednrb/Pdgfra/Gpc3/Nog/Ptch1/Myc/Wnt6/Lif/Notch3	16
GO:0044057	BP	GO:0044057	regulation of system process	34/512	659/28943	3.32273e-08	1.50335e-06	9.49018e-07	Edn3/Add3/Cacna2d1/Hopx/Dab2/Hgf/Pard3/Mdm4/Dlgap4/Cd38/Jam2/Tshz3/Rtn4/Abcg2/Hif1a/Wasf3/Kcnd3/Igf1/Ednrb/Abat/Atp2b4/Cacng4/Tmem100/Calca/Abl1/Zmpste24/Mef2a/Rgs2/Tgfb2/Srl/Ace/Atp1b1/Lif/Shank3	34
GO:0060325	BP	GO:0060325	face morphogenesis	9/512	41/28943	3.35092e-08	1.50496e-06	9.50033e-07	Arid5b/Tiparp/Lef1/Kat6a/Asph/Pdgfra/Nog/Crispld1/Tgfb2	9
GO:0045859	BP	GO:0045859	regulation of protein kinase activity	32/512	600/28943	3.97459e-08	1.77203e-06	1.11863e-06	Edn3/Ect2/Wnt5a/Egfr/Dab2/Hgf/Pdgfd/Zeb2/Heg1/Nedd9/Abi2/Cbl/Gprc5b/Synpo2/Igf1/Ccnd2/Atp2b4/Ptprc/Adar/Areg/Ppm1e/Npm1/Fzd4/Calca/Sfrp2/Abl1/Rgs2/Dab2ip/Tgfb2/Ppm1f/Ace/Tpx2	32
GO:0042063	BP	GO:0042063	gliogenesis	24/512	363/28943	4.10922e-08	1.81878e-06	1.14814e-06	Gli3/Pard3/Ptn/Apcdd1/Ccr2/Vcan/Vim/Rtn4/Lef1/Wasf3/Igf1/Areg/Nog/Zmiz1/Abl1/B4galt6/Myc/Dab2ip/Tgfb2/Fn1/Ccl2/Matn2/Lif/Shank3	24
GO:0001501	BP	GO:0001501	skeletal system development	31/512	570/28943	4.19301e-08	1.84251e-06	1.16312e-06	Has2/Wnt5a/Pbx1/Arid5b/Fst/Gli3/Tiparp/Itgb8/Bbx/Col11a1/Foxn3/Bnc2/Vcan/Osr1/Hif1a/Pkdcc/Zeb1/Pcsk5/Atp7a/Igf1/Pdgfra/Osr2/Ptprc/Nog/Sfrp4/Sfrp2/Snai2/Zmpste24/Myc/Pth1r/Tgfb2	31
GO:0048598	BP	GO:0048598	embryonic morphogenesis	34/512	668/28943	4.60315e-08	2.00829e-06	1.26777e-06	Wnt5a/Cobl/Cthrc1/Rbpj/Pbx1/Gli3/Aff3/Zeb2/Dlc1/Col11a1/Osr1/Macf1/Prickle1/Tshz1/Hif1a/Lef1/Zeb1/Fzd1/Pdgfra/Osr2/Gpc3/Nog/Ptch1/Sfrp2/Abl1/Eng/Myc/Sufu/Tgfb2/Fn1/Wnt6/Poglut1/Aplnr/Shank3	34
GO:0016331	BP	GO:0016331	morphogenesis of embryonic epithelium	17/512	188/28943	4.73122e-08	2.04952e-06	1.2938e-06	Wnt5a/Cobl/Cthrc1/Zeb2/Dlc1/Osr1/Prickle1/Hif1a/Fzd1/Nog/Ptch1/Sfrp2/Abl1/Sufu/Tgfb2/Wnt6/Shank3	17
GO:0051493	BP	GO:0051493	regulation of cytoskeleton organization	30/512	545/28943	5.34015e-08	2.29702e-06	1.45004e-06	Gnai1/Pfn2/Map2/Ect2/Add3/Mid1/Dlc1/Add1/Synpo/Abi2/Wasf3/Synpo2/Shroom2/Sema5a/Ppm1e/Npm1/Kirrel/Rdx/Tmod2/Scin/Abl1/Cdh5/Mark2/Tgfb2/Ppm1f/Sorbs3/Tpx2/Fscn1/Kank4/Shank3	30
GO:0001503	BP	GO:0001503	ossification	26/512	426/28943	5.59914e-08	2.39158e-06	1.50973e-06	Rorb/Wnt5a/Cthrc1/Rbpj/Pbx1/Suco/Gli3/Tgfbr3/Ptn/Osr1/Hif1a/Pkdcc/Fzd1/Igf1/Osr2/Gpc3/Adar/Areg/Nog/Ptch1/Calca/Sfrp2/Snai2/Zmpste24/Pth1r/Smoc1	26
GO:0030001	BP	GO:0030001	metal ion transport	41/512	911/28943	5.69893e-08	2.4173e-06	1.52596e-06	Edn3/Kcnd2/Steap4/Cacna2d1/Nkain1/Kcnab1/Kcnab2/Spink1/Ank3/Cp/Osr1/Xcl1/Alg10b/Asph/Slc4a7/Scara5/Kcnd3/Atp7a/Igf1/Ednrb/Atp2b4/Ptprc/Cxcl12/Cacng4/Heph/Slc30a4/Kcnip3/Calca/Abl1/Zmpste24/Tgfb2/Ccl2/Srl/Ace/Ccr5/Per1/Slc6a2/Usp2/Atp1b1/Aplnr/Slc6a6	41
GO:0048754	BP	GO:0048754	branching morphogenesis of an epithelial tube	17/512	191/28943	5.96989e-08	2.51476e-06	1.58749e-06	Wnt5a/Pbx1/Gli3/Lef1/Sema5a/Igf1/Pdgfra/Cxcl12/Gpc3/Areg/Nog/Ptch1/Sfrp2/Abl1/Eng/Myc/Wnt6	17
GO:0051017	BP	GO:0051017	actin filament bundle assembly	16/512	171/28943	7.29189e-08	3.05061e-06	1.92575e-06	Pfn2/Dlc1/Add1/Synpo/Arrb1/Spire1/Synpo2/Gas7/Ppm1e/Rdx/Abl1/Ppm1f/Sorbs3/Fscn1/Kank4/Shank3	16
GO:1903829	BP	GO:1903829	positive regulation of protein localization	28/512	493/28943	7.83016e-08	3.25351e-06	2.05384e-06	Gnai1/Ect2/Egfr/Gli3/Ank3/Ptn/Cd38/Tcaf1/Arrb1/Rtn4/Hif1a/Asph/Igf1/Abat/Ano1/Atp2b4/Msn/Tcaf2/Prr5l/Npm1/Dzip1/Rdx/C2cd5/Zdhhc2/Nkd2/Tgfb2/Ccl2/Lif	28
GO:0030900	BP	GO:0030900	forebrain development	25/512	407/28943	8.92978e-08	3.68535e-06	2.32644e-06	Wnt5a/Rbpj/Ccdc141/Egfr/Gli3/Dclk1/Zeb2/Dlc1/Zbtb18/Btbd3/Dclk2/Rtn4/Hif1a/Lef1/Atp7a/Sema5a/Cxcl12/Tsku/Nog/Zmiz1/Dab2ip/Fut10/Tacc1/Notch3/Shank3	25
GO:0061572	BP	GO:0061572	actin filament bundle organization	16/512	174/28943	9.29385e-08	3.80985e-06	2.40504e-06	Pfn2/Dlc1/Add1/Synpo/Arrb1/Spire1/Synpo2/Gas7/Ppm1e/Rdx/Abl1/Ppm1f/Sorbs3/Fscn1/Kank4/Shank3	16
GO:0001843	BP	GO:0001843	neural tube closure	13/512	112/28943	9.85901e-08	3.9952e-06	2.52205e-06	Wnt5a/Cobl/Cthrc1/Zeb2/Dlc1/Prickle1/Fzd1/Nog/Ptch1/Sfrp2/Abl1/Sufu/Tgfb2	13
GO:0051338	BP	GO:0051338	regulation of transferase activity	38/512	825/28943	9.87682e-08	3.9952e-06	2.52205e-06	Edn3/Ect2/Vav3/Wnt5a/Egfr/Dab2/Hgf/Pdgfd/Zeb2/Heg1/Nedd9/Hmbox1/Abi2/Cbl/Gprc5b/Synpo2/Igf1/Pdgfra/Ccnd2/Atp2b4/Ptprc/Adar/Areg/Ppm1e/Tnks/Npm1/Fzd4/Calca/Sfrp2/Abl1/Myc/Rgs2/Dab2ip/Tgfb2/Ppm1f/Ace/Tpx2/Mad2l2	38
GO:0035107	BP	GO:0035107	appendage morphogenesis	16/512	175/28943	1.00649e-07	4.00256e-06	2.52669e-06	Wnt5a/Pbx1/Gli3/Aff3/Osr1/Lef1/Pkdcc/Asph/Pcsk5/Atp7a/Osr2/Gpc3/Nog/Ptch1/Sfrp2/Tgfb2	16
GO:0035108	BP	GO:0035108	limb morphogenesis	16/512	175/28943	1.00649e-07	4.00256e-06	2.52669e-06	Wnt5a/Pbx1/Gli3/Aff3/Osr1/Lef1/Pkdcc/Asph/Pcsk5/Atp7a/Osr2/Gpc3/Nog/Ptch1/Sfrp2/Tgfb2	16
GO:0098771	BP	GO:0098771	inorganic ion homeostasis	32/512	625/28943	1.00916e-07	4.00256e-06	2.52669e-06	Edn3/Wnt5a/Steap4/Ube3a/Ank3/Ccr2/Cp/Xcl1/Hif1a/Asph/Slc4a7/Scara5/Atp7a/Aqp11/Ednrb/Atp2b4/Ptprc/Heph/Sfrp4/Slc30a4/Calca/Clstn1/Abl1/Cdh5/Myc/Pth1r/Tgfb2/Ccl2/Ace/Ccr5/Atp1b1/Aplnr	32
GO:0018209	BP	GO:0018209	peptidyl-serine modification	23/512	354/28943	1.07842e-07	4.24966e-06	2.68268e-06	Pfn2/Wnt5a/Egfr/Hgf/Dclk1/Mamdc2/Rps6ka5/Caprin2/Dclk2/Egflam/Arrb1/Camk1d/Atp2b4/Spock2/Tnks/Sfrp2/Mark2/Prkd2/Poglut1/Ppm1f/Galnt1/Mad2l2/Lif	23
GO:0060606	BP	GO:0060606	tube closure	13/512	113/28943	1.09633e-07	4.29256e-06	2.70976e-06	Wnt5a/Cobl/Cthrc1/Zeb2/Dlc1/Prickle1/Fzd1/Nog/Ptch1/Sfrp2/Abl1/Sufu/Tgfb2	13
GO:0060323	BP	GO:0060323	head morphogenesis	9/512	47/28943	1.1862e-07	4.61484e-06	2.9132e-06	Arid5b/Tiparp/Lef1/Kat6a/Asph/Pdgfra/Nog/Crispld1/Tgfb2	9
GO:0072073	BP	GO:0072073	kidney epithelium development	15/512	155/28943	1.19542e-07	4.62128e-06	2.91727e-06	Bmper/Basp1/Pbx1/Gli3/Vcan/Osr1/Tshz3/Aqp11/Ednrb/Gpc3/Nog/Ptch1/Myc/Wnt6/Lif	15
GO:0001841	BP	GO:0001841	neural tube formation	14/512	134/28943	1.2122e-07	4.65667e-06	2.93961e-06	Wnt5a/Cobl/Cthrc1/Zeb2/Dlc1/Prickle1/Hif1a/Fzd1/Nog/Ptch1/Sfrp2/Abl1/Sufu/Tgfb2	14
GO:0061448	BP	GO:0061448	connective tissue development	21/512	302/28943	1.24611e-07	4.75702e-06	3.00296e-06	Wnt5a/Arid5b/Gli3/Pdgfd/Creb5/Itgb8/Col11a1/Osr1/Hif1a/Pkdcc/Zeb1/Zfp516/Atp7a/Igf1/Osr2/Nog/Sfrp2/Snai2/Zmpste24/Pth1r/Tgfb2	21
GO:0032970	BP	GO:0032970	regulation of actin filament-based process	25/512	416/28943	1.35419e-07	5.13752e-06	3.24315e-06	Pfn2/Ect2/Add3/Frmd6/Pard3/Dlc1/Add1/Synpo/Abi2/Wasf3/Synpo2/Shroom2/Sema5a/Ppm1e/Kirrel/Rdx/Tmod2/Scin/Abl1/Tgfb2/Ppm1f/Sorbs3/Fscn1/Kank4/Shank3	25
GO:0060560	BP	GO:0060560	developmental growth involved in morphogenesis	20/512	278/28943	1.4359e-07	5.39206e-06	3.40384e-06	Edn3/Map2/Wnt5a/Cobl/Dclk1/Zeb2/Nrn1/Macf1/Cpne5/Slit3/Rtn4/Sema5a/Cxcl12/Areg/Sfrp2/Abl1/Fn1/Rnf157/Ccr5/Cpne1	20
GO:0050801	BP	GO:0050801	ion homeostasis	32/512	635/28943	1.44264e-07	5.39206e-06	3.40384e-06	Edn3/Wnt5a/Steap4/Ube3a/Ank3/Ccr2/Cp/Xcl1/Hif1a/Asph/Slc4a7/Scara5/Atp7a/Aqp11/Ednrb/Atp2b4/Ptprc/Heph/Sfrp4/Slc30a4/Calca/Clstn1/Abl1/Cdh5/Myc/Pth1r/Tgfb2/Ccl2/Ace/Ccr5/Atp1b1/Aplnr	32
GO:0048771	BP	GO:0048771	tissue remodeling	17/512	203/28943	1.44777e-07	5.39206e-06	3.40384e-06	Cthrc1/Rbpj/Suco/Tgfbr3/Ptn/Abi3bp/Ccr2/Cd38/Hif1a/Atp7a/Igf1/Lipa/Calca/Pth1r/Tgfb2/Abcb1b/Lif	17
GO:1902903	BP	GO:1902903	regulation of supramolecular fiber organization	24/512	389/28943	1.4909e-07	5.51903e-06	3.48399e-06	Pfn2/Map2/Add3/Mid1/Dlc1/Add1/Synpo/Abi2/Wasf3/Synpo2/Shroom2/Sema5a/Ppm1e/Kirrel/Rdx/Tmod2/Scin/Abl1/Cdh5/Ppm1f/Sorbs3/Tpx2/Kank4/Shank3	24
GO:0010171	BP	GO:0010171	body morphogenesis	10/512	63/28943	1.5176e-07	5.53283e-06	3.4927e-06	Arid5b/Tiparp/Lef1/Kat6a/Asph/Pdgfra/Gpc3/Nog/Crispld1/Tgfb2	10
GO:0060324	BP	GO:0060324	face development	10/512	63/28943	1.5176e-07	5.53283e-06	3.4927e-06	Wnt5a/Arid5b/Tiparp/Lef1/Kat6a/Asph/Pdgfra/Nog/Crispld1/Tgfb2	10
GO:0110053	BP	GO:0110053	regulation of actin filament organization	20/512	279/28943	1.5218e-07	5.53283e-06	3.4927e-06	Pfn2/Add3/Dlc1/Add1/Synpo/Abi2/Wasf3/Synpo2/Shroom2/Sema5a/Ppm1e/Kirrel/Rdx/Tmod2/Scin/Abl1/Ppm1f/Sorbs3/Kank4/Shank3	20
GO:0042692	BP	GO:0042692	muscle cell differentiation	26/512	449/28943	1.5715e-07	5.67971e-06	3.58542e-06	Col14a1/Lama2/Lamc1/Rbpj/Hopx/Nid1/Atp11a/Smarca2/Tshz3/Zeb1/Adamts15/Igf1/Ednrb/Pdgfra/Ccnd2/Myof/Cxcl12/Tmod2/Tcf23/Zmpste24/Mef2a/Eng/Myc/Rgs2/Spag9/Aplnr	26
GO:0043583	BP	GO:0043583	ear development	19/512	254/28943	1.6076e-07	5.77603e-06	3.64623e-06	Bmper/Wnt5a/Cthrc1/Rbpj/Gli3/Col11a1/Lin7a/Osr1/Tshz1/Zeb1/Alg10b/Slc4a7/Shroom2/Igf1/Osr2/Tsku/Nog/Myc/Tgfb2	19
GO:0051129	BP	GO:0051129	negative regulation of cellular component organization	35/512	739/28943	1.66143e-07	5.8865e-06	3.71596e-06	Pfn2/Map2/Wnt5a/Add3/Dab2/Hgf/Ntm/Ube3a/Fez1/Mid1/Dlc1/Ptprg/Add1/Ptn/Vim/Cd38/Rtn4/Shroom2/Sema5a/Igf1/Tsku/Tnks/Npm1/Rdx/Tmod2/Scin/Cdh5/Ace/Ccr5/Tpx2/Efnb3/Lif/Kank4/Shank3/Il15ra	35
GO:0048736	BP	GO:0048736	appendage development	17/512	205/28943	1.66726e-07	5.8865e-06	3.71596e-06	Wnt5a/Pbx1/Gli3/Aff3/Osr1/Lef1/Pkdcc/Asph/Pcsk5/Atp7a/Osr2/Gpc3/Nog/Ptch1/Sfrp2/Smoc1/Tgfb2	17
GO:0060173	BP	GO:0060173	limb development	17/512	205/28943	1.66726e-07	5.8865e-06	3.71596e-06	Wnt5a/Pbx1/Gli3/Aff3/Osr1/Lef1/Pkdcc/Asph/Pcsk5/Atp7a/Osr2/Gpc3/Nog/Ptch1/Sfrp2/Smoc1/Tgfb2	17
GO:0000165	BP	GO:0000165	MAPK cascade	37/512	808/28943	1.68974e-07	5.93156e-06	3.74441e-06	Bmper/Edn3/Wnt5a/Egfr/Dab2/Cd36/Hgf/Pdgfd/Zeb2/Mid1/Eda2r/Grb10/Ccr2/Xcl1/Arrb1/Mfhas1/Igf1/Pdgfra/Ptprc/Cxcl12/Fzd4/Sfrp4/Sfrp2/Abl1/Mef2a/Myc/Rgs2/Dab2ip/Prkd2/Tgfb2/Fn1/Ccl2/Per1/Spag9/Sorbs3/Lif/Shank3	37
GO:0043549	BP	GO:0043549	regulation of kinase activity	34/512	706/28943	1.70021e-07	5.93424e-06	3.7461e-06	Edn3/Ect2/Vav3/Wnt5a/Egfr/Dab2/Hgf/Pdgfd/Zeb2/Heg1/Nedd9/Abi2/Cbl/Gprc5b/Synpo2/Igf1/Pdgfra/Ccnd2/Atp2b4/Ptprc/Adar/Areg/Ppm1e/Npm1/Fzd4/Calca/Sfrp2/Abl1/Rgs2/Dab2ip/Tgfb2/Ppm1f/Ace/Tpx2	34
GO:0007169	BP	GO:0007169	transmembrane receptor protein tyrosine kinase signaling pathway	31/512	609/28943	1.82006e-07	6.31644e-06	3.98737e-06	Jak1/Tcf4/Wnt5a/Rbpj/Arid5b/Egfr/Tiparp/Hgf/Pdgfd/Pid1/Col4a5/Grb10/Nedd9/Rtn4/Hif1a/Cbl/Ccbe1/Col4a6/Igf1/Pdgfra/Myof/Areg/Nog/Fzd4/Abl1/C2cd5/Dab2ip/Prkd2/Fam83a/Ccl2/Efnb3	31
GO:0010563	BP	GO:0010563	negative regulation of phosphorus metabolic process	26/512	453/28943	1.86622e-07	6.40386e-06	4.04256e-06	Hgf/Pid1/Pard3/Spink1/Grb10/Heg1/Arrb1/Cbl/Mfhas1/Igf1/Ptprc/Adar/Ppm1e/Nog/Prr5l/Npm1/Kirrel/Zbed3/Sfrp2/Abl1/Eng/Rgs2/Dab2ip/Tgfb2/Ppm1f/Ppp1r16b	26
GO:0045936	BP	GO:0045936	negative regulation of phosphate metabolic process	26/512	453/28943	1.86622e-07	6.40386e-06	4.04256e-06	Hgf/Pid1/Pard3/Spink1/Grb10/Heg1/Arrb1/Cbl/Mfhas1/Igf1/Ptprc/Adar/Ppm1e/Nog/Prr5l/Npm1/Kirrel/Zbed3/Sfrp2/Abl1/Eng/Rgs2/Dab2ip/Tgfb2/Ppm1f/Ppp1r16b	26
GO:0001654	BP	GO:0001654	eye development	25/512	424/28943	1.94041e-07	6.62125e-06	4.17979e-06	Rorb/Tenm3/Pbx1/Egfr/Gli3/Cyp1b1/Zeb2/Rcn1/Ptn/Ndp/Prdm1/Vim/Hif1a/Abi2/Zeb1/Slc4a7/Shroom2/Pdgfra/Crybg3/Osr2/Tsku/Fzd4/Smoc1/Tgfb2/Lif	25
GO:0055080	BP	GO:0055080	cation homeostasis	31/512	612/28943	2.02591e-07	6.87459e-06	4.33971e-06	Edn3/Wnt5a/Steap4/Ube3a/Ank3/Ccr2/Cp/Xcl1/Hif1a/Asph/Slc4a7/Scara5/Atp7a/Aqp11/Ednrb/Atp2b4/Ptprc/Heph/Slc30a4/Calca/Clstn1/Abl1/Cdh5/Myc/Pth1r/Tgfb2/Ccl2/Ace/Ccr5/Atp1b1/Aplnr	31
GO:0032956	BP	GO:0032956	regulation of actin cytoskeleton organization	23/512	368/28943	2.15438e-07	7.27015e-06	4.58942e-06	Pfn2/Ect2/Add3/Dlc1/Add1/Synpo/Abi2/Wasf3/Synpo2/Shroom2/Sema5a/Ppm1e/Kirrel/Rdx/Tmod2/Scin/Abl1/Tgfb2/Ppm1f/Sorbs3/Fscn1/Kank4/Shank3	23
GO:0150063	BP	GO:0150063	visual system development	25/512	427/28943	2.21518e-07	7.43426e-06	4.69301e-06	Rorb/Tenm3/Pbx1/Egfr/Gli3/Cyp1b1/Zeb2/Rcn1/Ptn/Ndp/Prdm1/Vim/Hif1a/Abi2/Zeb1/Slc4a7/Shroom2/Pdgfra/Crybg3/Osr2/Tsku/Fzd4/Smoc1/Tgfb2/Lif	25
GO:0003203	BP	GO:0003203	endocardial cushion morphogenesis	8/512	37/28943	2.23351e-07	7.45278e-06	4.70471e-06	Rbpj/Mdm4/Nog/Tmem100/Snai2/Eng/Tgfb2/Aplnr	8
GO:0043542	BP	GO:0043542	endothelial cell migration	18/512	234/28943	2.24511e-07	7.45278e-06	4.70471e-06	Bmper/Stard13/Wnt5a/Col18a1/Cyp1b1/Hif1a/Ccbe1/Sema5a/Igf1/Atp2b4/Cxcl12/Calca/Abl1/Snai2/Cdh5/Dab2ip/Prkd2/Fstl1	18
GO:0014066	BP	GO:0014066	regulation of phosphatidylinositol 3-kinase signaling	12/512	101/28943	2.36567e-07	7.81053e-06	4.93055e-06	Egfr/Hgf/Selp/Pdgfd/Ube3a/Cbl/Igf1/Prr5l/Dab2ip/Tgfb2/Fn1/Ppp1r16b	12
GO:0048880	BP	GO:0048880	sensory system development	25/512	431/28943	2.63765e-07	8.6617e-06	5.46786e-06	Rorb/Tenm3/Pbx1/Egfr/Gli3/Cyp1b1/Zeb2/Rcn1/Ptn/Ndp/Prdm1/Vim/Hif1a/Abi2/Zeb1/Slc4a7/Shroom2/Pdgfra/Crybg3/Osr2/Tsku/Fzd4/Smoc1/Tgfb2/Lif	25
GO:0043410	BP	GO:0043410	positive regulation of MAPK cascade	28/512	526/28943	2.9447e-07	9.56963e-06	6.04101e-06	Bmper/Edn3/Wnt5a/Egfr/Dab2/Cd36/Hgf/Pdgfd/Zeb2/Mid1/Eda2r/Ccr2/Xcl1/Arrb1/Mfhas1/Igf1/Pdgfra/Ptprc/Cxcl12/Fzd4/Abl1/Dab2ip/Prkd2/Tgfb2/Ccl2/Spag9/Sorbs3/Lif	28
GO:0001933	BP	GO:0001933	negative regulation of protein phosphorylation	22/512	346/28943	2.94937e-07	9.56963e-06	6.04101e-06	Hgf/Pid1/Pard3/Spink1/Heg1/Arrb1/Cbl/Igf1/Ptprc/Adar/Ppm1e/Nog/Prr5l/Npm1/Kirrel/Zbed3/Sfrp2/Abl1/Eng/Rgs2/Dab2ip/Ppm1f	22
GO:0061028	BP	GO:0061028	establishment of endothelial barrier	9/512	52/28943	2.96113e-07	9.56963e-06	6.04101e-06	Akap11/Add1/Pde2a/Ednrb/Msn/Rdx/Cdh5/Abcb1b/Ppp1r16b	9
GO:0003198	BP	GO:0003198	epithelial to mesenchymal transition involved in endocardial cushion formation	6/512	17/28943	3.12144e-07	1.00346e-05	6.33454e-06	Rbpj/Nog/Tmem100/Snai2/Eng/Tgfb2	6
GO:0021543	BP	GO:0021543	pallium development	15/512	167/28943	3.17457e-07	1.0152e-05	6.40862e-06	Ccdc141/Egfr/Gli3/Zeb2/Zbtb18/Btbd3/Dclk2/Rtn4/Hif1a/Lef1/Tsku/Zmiz1/Dab2ip/Fut10/Tacc1	15
GO:0010564	BP	GO:0010564	regulation of cell cycle process	34/512	726/28943	3.24172e-07	1.03127e-05	6.51009e-06	Edn3/Gnai1/Racgap1/Ect2/Wnt5a/Pbx1/Egfr/Clock/Ppp2r5c/Smc5/Cdc14a/Klhl13/Foxn3/Smarca2/Lef1/Xpo1/Igf1/Ccnd2/Atp2b4/Apbb2/Brd4/Tnks/Npm1/Adamts1/Hus1/Rdx/Zmpste24/Myc/Dab2ip/Ccl2/Rrp8/Tpx2/Lif/Spast	34
GO:0048145	BP	GO:0048145	regulation of fibroblast proliferation	13/512	124/28943	3.28395e-07	1.03929e-05	6.56074e-06	Wnt5a/Egfr/Pdgfd/Smarca2/Igf1/Pdgfra/Zmiz1/Abl1/Zmpste24/Myc/Dab2ip/Fn1/Lif	13
GO:0030003	BP	GO:0030003	cellular cation homeostasis	27/512	498/28943	3.35668e-07	1.05683e-05	6.67147e-06	Edn3/Wnt5a/Steap4/Ube3a/Ccr2/Xcl1/Hif1a/Asph/Slc4a7/Scara5/Atp7a/Aqp11/Atp2b4/Ptprc/Heph/Slc30a4/Calca/Clstn1/Abl1/Cdh5/Myc/Pth1r/Tgfb2/Ccl2/Ccr5/Atp1b1/Aplnr	27
GO:0062009	BP	GO:0062009	secondary palate development	7/512	27/28943	3.40061e-07	1.06518e-05	6.72412e-06	Wnt5a/Itgb8/Tgfbr3/Tshz1/Lef1/Fzd1/Tgfb2	7
GO:0048568	BP	GO:0048568	embryonic organ development	28/512	531/28943	3.56151e-07	1.10425e-05	6.97078e-06	Wnt5a/Cobl/Cthrc1/Rbpj/Pbx1/Egfr/Gli3/Col11a1/Prdm1/Osr1/Tshz1/Hif1a/Lef1/Kat6a/Pkdcc/Zeb1/Pcsk5/Pdgfra/Osr2/Nog/Ptch1/Eng/Myc/Sufu/Xist/Tgfb2/Aplnr/Lif	28
GO:0055065	BP	GO:0055065	metal ion homeostasis	28/512	531/28943	3.56151e-07	1.10425e-05	6.97078e-06	Edn3/Wnt5a/Steap4/Ank3/Ccr2/Cp/Xcl1/Hif1a/Asph/Scara5/Atp7a/Ednrb/Atp2b4/Ptprc/Heph/Slc30a4/Calca/Clstn1/Abl1/Cdh5/Myc/Pth1r/Tgfb2/Ccl2/Ace/Ccr5/Atp1b1/Aplnr	28
GO:0080135	BP	GO:0080135	regulation of cellular response to stress	34/512	730/28943	3.67618e-07	1.13405e-05	7.15888e-06	Wnt5a/Egfr/Dab2/Cd36/Hgf/Ino80d/Mid1/Eda2r/Ptn/Ccr2/Smarca2/Rtn4/Hif1a/Mfhas1/Spire1/Tex15/Fzd1/Aqp11/Ddah1/Cxcl12/Brd4/Npm1/Rnft2/Sfrp4/Sfrp2/Abl1/Snai2/Zmpste24/Myc/Dab2ip/Tgfb2/Pogz/Per1/Mad2l2	34
GO:0001701	BP	GO:0001701	in utero embryonic development	29/512	565/28943	3.83684e-07	1.17766e-05	7.4342e-06	Rbpj/Hopx/Egfr/Dab2/Gli3/Tgfbr3/Rcn1/Atp11a/Add1/Zbtb18/Heg1/Prdm1/Tshz3/Rtn4/Hif1a/Lef1/Igf1/Pdgfra/Prrc2b/Nog/Brd4/Tmem100/Zmiz1/Ptch1/Pth1r/Xist/Sh3pxd2a/Atp1b1/Lif	29
GO:0022409	BP	GO:0022409	positive regulation of cell-cell adhesion	21/512	324/28943	4.00547e-07	1.22327e-05	7.72213e-06	Jak1/Has2/Wnt5a/Gli3/Selp/Magi1/Ank3/Adam19/Ccr2/Smarca2/Xcl1/Lef1/Myo10/Igf1/Ptprc/Chst2/Zmiz1/Ccl2/Ccr5/Efnb3/Cd83	21
GO:0003272	BP	GO:0003272	endocardial cushion formation	7/512	28/28943	4.46521e-07	1.35689e-05	8.56563e-06	Rbpj/Nog/Tmem100/Snai2/Eng/Tgfb2/Aplnr	7
GO:0003013	BP	GO:0003013	circulatory system process	29/512	571/28943	4.76218e-07	1.43997e-05	9.09009e-06	Edn3/Add3/Cacna2d1/Hopx/Cd36/Tgfbr3/Pde2a/Mdm4/Heg1/Cd38/Abcg2/Hif1a/Kcnd3/Ednrb/Abat/Atp2b4/Ddah1/Calca/Abl1/Zmpste24/Cdh5/Mef2a/Eng/Rgs2/Tgfb2/Ace/Abcb1b/Atp1b1/Tac2	29
GO:0019233	BP	GO:0019233	sensory perception of pain	14/512	150/28943	4.91109e-07	1.47768e-05	9.32814e-06	Kcnd2/Dlg2/Mme/Penk/Ccr2/Rtn4/Ednrb/Ano1/Cxcl12/Tmem100/Kcnip3/Calca/Ccl2/Ace	14
GO:0003206	BP	GO:0003206	cardiac chamber morphogenesis	14/512	151/28943	5.32659e-07	1.58706e-05	1.00186e-05	Wnt5a/Rbpj/Tgfbr3/Col11a1/Heg1/Slit3/Hif1a/Fzd1/Nog/Adamts1/Sfrp2/Eng/Tgfb2/Aplnr	14
GO:0050921	BP	GO:0050921	positive regulation of chemotaxis	14/512	151/28943	5.32659e-07	1.58706e-05	1.00186e-05	Edn3/Wnt5a/Pdgfd/Ptn/Ccr2/Xcl1/Camk1d/Sema5a/Cxcl12/Snai2/Prkd2/Fn1/Ccl2/Ppm1f	14
GO:0021915	BP	GO:0021915	neural tube development	16/512	200/28943	6.23013e-07	1.83834e-05	1.16049e-05	Wnt5a/Cobl/Cthrc1/Gli3/Zeb2/Dlc1/Prickle1/Hif1a/Fzd1/Nog/Ptch1/Sfrp2/Abl1/Sufu/Tgfb2/Gpr161	16
GO:1990138	BP	GO:1990138	neuron projection extension	16/512	200/28943	6.23013e-07	1.83834e-05	1.16049e-05	Edn3/Map2/Wnt5a/Dclk1/Nrn1/Macf1/Cpne5/Slit3/Rtn4/Sema5a/Cxcl12/Abl1/Fn1/Rnf157/Ccr5/Cpne1	16
GO:0045860	BP	GO:0045860	positive regulation of protein kinase activity	22/512	363/28943	6.63453e-07	1.93376e-05	1.22072e-05	Edn3/Ect2/Wnt5a/Egfr/Pdgfd/Zeb2/Nedd9/Abi2/Gprc5b/Igf1/Ccnd2/Atp2b4/Ptprc/Areg/Npm1/Fzd4/Calca/Abl1/Dab2ip/Tgfb2/Ace/Tpx2	22
GO:1905475	BP	GO:1905475	regulation of protein localization to membrane	16/512	201/28943	6.66042e-07	1.93376e-05	1.22072e-05	Egfr/Dab2/Pid1/Gpc6/Ank3/Ptn/Tcaf1/Pkdcc/Atp2b4/Gpc3/Tcaf2/C2cd5/Zdhhc2/Nkd2/Ccl2/Shank3	16
GO:0035567	BP	GO:0035567	non-canonical Wnt signaling pathway	9/512	57/28943	6.69518e-07	1.93376e-05	1.22072e-05	Wnt5a/Cthrc1/Dab2/Fzd1/Gpc3/Fzd4/Sfrp4/Sfrp2/Abl1	9
GO:1903053	BP	GO:1903053	regulation of extracellular matrix organization	9/512	57/28943	6.69518e-07	1.93376e-05	1.22072e-05	Has2/Lama2/Lamc1/Ric1/Nid1/Sema5a/Abl1/Tgfb2/Fscn1	9
GO:0051494	BP	GO:0051494	negative regulation of cytoskeleton organization	15/512	177/28943	6.7118e-07	1.93376e-05	1.22072e-05	Pfn2/Map2/Add3/Mid1/Dlc1/Add1/Shroom2/Npm1/Rdx/Tmod2/Scin/Cdh5/Tpx2/Kank4/Shank3	15
GO:0006873	BP	GO:0006873	cellular ion homeostasis	27/512	517/28943	6.94659e-07	1.99201e-05	1.25749e-05	Edn3/Wnt5a/Steap4/Ube3a/Ccr2/Xcl1/Hif1a/Asph/Slc4a7/Scara5/Atp7a/Aqp11/Atp2b4/Ptprc/Heph/Slc30a4/Calca/Clstn1/Abl1/Cdh5/Myc/Pth1r/Tgfb2/Ccl2/Ccr5/Atp1b1/Aplnr	27
GO:0010976	BP	GO:0010976	positive regulation of neuron projection development	17/512	227/28943	7.06737e-07	2.01717e-05	1.27338e-05	Tenm3/Wnt5a/Cobl/Hgf/Fez1/Ptn/Caprin2/Camk1d/Gprc5b/Fzd1/Adamts1/Arsb/Abl1/Mark2/Rgs2/Dab2ip/Lif	17
GO:0042326	BP	GO:0042326	negative regulation of phosphorylation	23/512	394/28943	7.10485e-07	2.01844e-05	1.27418e-05	Hgf/Pid1/Pard3/Spink1/Grb10/Heg1/Arrb1/Cbl/Igf1/Ptprc/Adar/Ppm1e/Nog/Prr5l/Npm1/Kirrel/Zbed3/Sfrp2/Abl1/Eng/Rgs2/Dab2ip/Ppm1f	23
GO:0006875	BP	GO:0006875	cellular metal ion homeostasis	24/512	425/28943	7.37801e-07	2.08634e-05	1.31704e-05	Edn3/Wnt5a/Steap4/Ccr2/Xcl1/Hif1a/Asph/Scara5/Atp7a/Atp2b4/Ptprc/Heph/Slc30a4/Calca/Clstn1/Abl1/Cdh5/Myc/Pth1r/Tgfb2/Ccl2/Ccr5/Atp1b1/Aplnr	24
GO:0051962	BP	GO:0051962	positive regulation of nervous system development	22/512	366/28943	7.61331e-07	2.14295e-05	1.35278e-05	Gli3/Mme/Zeb2/Ptn/Lrrn1/Caprin2/Vim/Macf1/Slitrk3/Rtn4/Hif1a/Sema5a/Igf1/Cxcl12/Nog/Clstn1/Tiam2/Myc/Fn1/Ace/Lif/Shank3	22
GO:0048863	BP	GO:0048863	stem cell differentiation	19/512	282/28943	7.97792e-07	2.23528e-05	1.41106e-05	Edn3/Cyp26a1/Zeb2/Ptn/Osr1/Kbtbd8/Prickle1/Hif1a/Sema5a/Fzd1/Ednrb/Pdgfra/Ptprc/Nog/Sfrp2/Snai2/Tgfb2/Fn1/Lif	19
GO:0014065	BP	GO:0014065	phosphatidylinositol 3-kinase signaling	13/512	134/28943	8.06253e-07	2.23894e-05	1.41337e-05	Egfr/Hgf/Selp/Pdgfd/Ube3a/Prex2/Cbl/Igf1/Prr5l/Dab2ip/Tgfb2/Fn1/Ppp1r16b	13
GO:0001823	BP	GO:0001823	mesonephros development	12/512	113/28943	8.09696e-07	2.23894e-05	1.41337e-05	Bmper/Pbx1/Gli3/Vcan/Osr1/Tshz3/Osr2/Gpc3/Nog/Ptch1/Myc/Wnt6	12
GO:0019725	BP	GO:0019725	cellular homeostasis	35/512	791/28943	8.10094e-07	2.23894e-05	1.41337e-05	Edn3/Zbtb20/Wnt5a/Steap4/Ube3a/Add1/Ccr2/Xcl1/Arrb1/Rtn4/Hif1a/Asph/Slc4a7/Scara5/Atp7a/Aqp11/Igf1/Ano1/Atp2b4/Ptprc/Npm1/Heph/Slc30a4/Calca/Clstn1/Abl1/Cdh5/Myc/Pth1r/Tgfb2/Ccl2/Ccr5/Atp1b1/Aplnr/Shank3	35
GO:0032535	BP	GO:0032535	regulation of cellular component size	23/512	398/28943	8.45346e-07	2.32584e-05	1.46823e-05	Pfn2/Map2/Wnt5a/Add3/Add1/Macf1/Rtn4/Shroom2/Atp7a/Sema5a/Aqp11/Cxcl12/Npm1/Kirrel/Rdx/Tmod2/Scin/Abl1/Fn1/Ccr5/Kank4/Inf2/Shank3	23
GO:0048644	BP	GO:0048644	muscle organ morphogenesis	11/512	94/28943	8.77583e-07	2.40371e-05	1.51739e-05	Wnt5a/Rbpj/Arid5b/Tgfbr3/Col11a1/Heg1/Fzd1/Nog/Eng/Tgfb2/Lif	11
GO:0051668	BP	GO:0051668	localization within membrane	32/512	690/28943	8.93045e-07	2.43514e-05	1.53723e-05	Dlg2/Egfr/Dab2/Pid1/Gpc6/Pard3/Ank3/Dennd1a/Ptn/Lin7a/Vps39/Macf1/Slitrk3/Tcaf1/Pkdcc/Aqp11/Atp2b4/Ptprc/Gpc3/Tcaf2/Cacng4/Tram2/Ptch1/Rdx/Kcnip3/Clstn1/C2cd5/Zdhhc2/Nkd2/Ccl2/Atp1b1/Shank3	32
GO:0007043	BP	GO:0007043	cell-cell junction assembly	14/512	158/28943	9.23437e-07	2.50682e-05	1.58248e-05	Ect2/Cdh11/Hopx/Pard3/Heg1/Cdh10/Arvcf/Abi2/Snai2/Cdh5/Ace/Fbf1/Fscn1/Aplnr	14
GO:0007389	BP	GO:0007389	pattern specification process	26/512	493/28943	9.30801e-07	2.51563e-05	1.58804e-05	Wnt5a/Cobl/Cyp26a1/Rbpj/Pbx1/Fst/Gli3/Zeb2/Osr1/Tshz1/Hif1a/Lef1/Zeb1/Asph/Pcsk5/Scmh1/Gpc3/Nog/Ptch1/Sfrp2/Eng/Sufu/Wnt6/Poglut1/Gpr161/Aplnr	26
GO:0060326	BP	GO:0060326	cell chemotaxis	20/512	314/28943	9.90931e-07	2.66635e-05	1.68318e-05	Edn3/Vav3/Wnt5a/Hgf/Pdgfd/Ptn/Ccr2/Xcl1/Camk1d/Lef1/Sema5a/Ednrb/Pdgfra/Cxcl12/Calca/Snai2/Eng/Prkd2/Ccl2/Ccr5	20
GO:0010638	BP	GO:0010638	positive regulation of organelle organization	27/512	527/28943	1.00286e-06	2.6866e-05	1.69597e-05	Edn3/Pfn2/Wnt5a/Add3/Ino80d/Smc5/Synpo/Vps13d/Hmbox1/Hif1a/Abi2/Spire1/Wasf3/Synpo2/Sema5a/Igf1/Msn/Ppm1e/Tnks/Kirrel/Dzip1/Scin/Abl1/C2cd5/Ppm1f/Sorbs3/Fscn1	27
GO:0055082	BP	GO:0055082	cellular chemical homeostasis	32/512	694/28943	1.01077e-06	2.69596e-05	1.70188e-05	Edn3/Zbtb20/Wnt5a/Steap4/Ube3a/Ccr2/Xcl1/Arrb1/Rtn4/Hif1a/Asph/Slc4a7/Scara5/Atp7a/Aqp11/Igf1/Ano1/Atp2b4/Ptprc/Heph/Slc30a4/Calca/Clstn1/Abl1/Cdh5/Myc/Pth1r/Tgfb2/Ccl2/Ccr5/Atp1b1/Aplnr	32
GO:0042303	BP	GO:0042303	molting cycle	13/512	137/28943	1.03873e-06	2.72569e-05	1.72064e-05	Wnt5a/Lamc1/Rbpj/Fst/Egfr/Clock/Apcdd1/Atp7a/Tsku/Zmpste24/Farp2/Tgfb2/Per1	13
GO:0042633	BP	GO:0042633	hair cycle	13/512	137/28943	1.03873e-06	2.72569e-05	1.72064e-05	Wnt5a/Lamc1/Rbpj/Fst/Egfr/Clock/Apcdd1/Atp7a/Tsku/Zmpste24/Farp2/Tgfb2/Per1	13
GO:0051347	BP	GO:0051347	positive regulation of transferase activity	27/512	528/28943	1.03977e-06	2.72569e-05	1.72064e-05	Edn3/Ect2/Vav3/Wnt5a/Egfr/Pdgfd/Zeb2/Nedd9/Hmbox1/Abi2/Gprc5b/Igf1/Pdgfra/Ccnd2/Atp2b4/Ptprc/Areg/Tnks/Npm1/Fzd4/Calca/Abl1/Myc/Dab2ip/Tgfb2/Ace/Tpx2	27
GO:0050808	BP	GO:0050808	synapse organization	26/512	496/28943	1.04201e-06	2.72569e-05	1.72064e-05	Pfn2/Wnt5a/Ube3a/Gpc6/Col4a5/Palld/Filip1/Ank3/Ppfia2/Ptn/Lrrn1/Synpo/Caprin2/Pdzrn3/Slitrk3/Erc1/Abi2/Wasf3/Fzd1/Ppfibp1/Clstn1/Abl1/Zdhhc2/Dab2ip/Ntng2/Shank3	26
GO:0048146	BP	GO:0048146	positive regulation of fibroblast proliferation	10/512	77/28943	1.04422e-06	2.72569e-05	1.72064e-05	Wnt5a/Egfr/Pdgfd/Igf1/Pdgfra/Zmiz1/Abl1/Myc/Fn1/Lif	10
GO:0010977	BP	GO:0010977	negative regulation of neuron projection development	14/512	160/28943	1.07459e-06	2.79301e-05	1.76314e-05	Map2/Wnt5a/Dab2/Ntm/Ube3a/Ptprg/Vim/Cd38/Rtn4/Sema5a/Tsku/Ccr5/Efnb3/Il15ra	14
GO:1901879	BP	GO:1901879	regulation of protein depolymerization	11/512	96/28943	1.08591e-06	2.81049e-05	1.77417e-05	Map2/Add3/Mid1/Add1/Asph/Shroom2/Sema5a/Rdx/Tmod2/Scin/Tpx2	11
GO:0045926	BP	GO:0045926	negative regulation of growth	18/512	261/28943	1.11035e-06	2.86161e-05	1.80645e-05	Map2/Wnt5a/Dab2/Caprin2/Smarca2/Slit3/Rtn4/Hif1a/Sema5a/Tro/Gpc3/Nog/Ptch1/Sfrp2/Rgs2/Dab2ip/Tgfb2/Ccr5	18
GO:0031400	BP	GO:0031400	negative regulation of protein modification process	27/512	530/28943	1.11739e-06	2.86767e-05	1.81027e-05	Hgf/Pid1/Pard3/Spink1/Heg1/Arrb1/Cbl/Mfhas1/Igf1/Atp2b4/Ptprc/Adar/Ppm1e/Nog/Prr5l/Npm1/Kirrel/Zbed3/Sfrp2/Zfp451/Abl1/Eng/Rgs2/Dab2ip/Ppm1f/Mad2l2/Ppp1r16b	27
GO:0048872	BP	GO:0048872	homeostasis of number of cells	22/512	375/28943	1.1398e-06	2.91294e-05	1.83884e-05	Col14a1/Rps24/Tgfbr3/Add1/Zbtb18/Ccr2/Smarca2/Hif1a/Mfhas1/Tsc22d3/Rbfox2/Tex15/Adar/Lmo1/Crispld1/Heph/Lipa/Abl1/Tgfb2/Ccl2/Fstl1/Ubap2l	22
GO:0051090	BP	GO:0051090	regulation of DNA-binding transcription factor activity	24/512	436/28943	1.158e-06	2.94712e-05	1.86043e-05	Wnt5a/Pbx1/Arid5b/Gli3/Cd36/Clock/Tgfbr3/Cyp1b1/Eda2r/Ndp/Rps6ka5/Erc1/Arrb1/Camk1d/Kat6a/Fzd1/Npm1/Fzd4/Sfrp4/Ptch1/Dab2ip/Sufu/Prkd2/Mad2l2	24
GO:0043010	BP	GO:0043010	camera-type eye development	22/512	376/28943	1.19107e-06	3.0187e-05	1.90561e-05	Rorb/Tenm3/Egfr/Gli3/Cyp1b1/Zeb2/Rcn1/Ptn/Ndp/Vim/Hif1a/Abi2/Zeb1/Slc4a7/Shroom2/Pdgfra/Crybg3/Osr2/Tsku/Fzd4/Tgfb2/Lif	22
GO:0001570	BP	GO:0001570	vasculogenesis	11/512	97/28943	1.20552e-06	3.04269e-05	1.92075e-05	Has2/Tiparp/Itgb8/Tgfbr3/Heg1/Rtn4/Tmem100/Fzd4/Zmiz1/Eng/Aplnr	11
GO:0043408	BP	GO:0043408	regulation of MAPK cascade	33/512	735/28943	1.22455e-06	3.078e-05	1.94305e-05	Bmper/Edn3/Wnt5a/Egfr/Dab2/Cd36/Hgf/Pdgfd/Zeb2/Mid1/Eda2r/Ccr2/Xcl1/Arrb1/Mfhas1/Igf1/Pdgfra/Ptprc/Cxcl12/Fzd4/Sfrp4/Sfrp2/Abl1/Rgs2/Dab2ip/Prkd2/Tgfb2/Fn1/Ccl2/Per1/Spag9/Sorbs3/Lif	33
GO:0032388	BP	GO:0032388	positive regulation of intracellular transport	15/512	187/28943	1.34713e-06	3.35847e-05	2.1201e-05	Map2/Ect2/Dab2/Gli3/Fez1/Ank3/Tcaf1/Asph/Msn/Tcaf2/Prr5l/Rdx/C2cd5/Zdhhc2/Ccl2	15
GO:0043271	BP	GO:0043271	negative regulation of ion transport	15/512	187/28943	1.34713e-06	3.35847e-05	2.1201e-05	Kcnab1/Spink1/Ank3/Slc43a2/Osr1/Atp7a/Abat/Tcaf2/Sfrp4/Calca/Maob/Rgs2/Tgfb2/Ace/Usp2	15
GO:0033674	BP	GO:0033674	positive regulation of kinase activity	24/512	440/28943	1.35877e-06	3.37373e-05	2.12973e-05	Edn3/Ect2/Vav3/Wnt5a/Egfr/Pdgfd/Zeb2/Nedd9/Abi2/Gprc5b/Igf1/Pdgfra/Ccnd2/Atp2b4/Ptprc/Areg/Npm1/Fzd4/Calca/Abl1/Dab2ip/Tgfb2/Ace/Tpx2	24
GO:0042060	BP	GO:0042060	wound healing	22/512	380/28943	1.41795e-06	3.50641e-05	2.21349e-05	Pros1/Wnt5a/Cd36/Selp/Tfpi2/Pard3/Abi3bp/Ccr2/Macf1/Hif1a/Igf1/Abat/Pdgfra/Myof/Tsku/Nog/Snai2/Eng/Tgfb2/Fn1/Ccl2/Tfpi	22
GO:0030323	BP	GO:0030323	respiratory tube development	17/512	239/28943	1.44184e-06	3.55112e-05	2.24171e-05	Wnt5a/Rbpj/Hopx/Gli3/Heg1/Tshz3/Pkdcc/Ccbe1/Pcsk5/Atp7a/Igf1/Pdgfra/Gpc3/Nog/Lipa/Ace/Lif	17
GO:0060541	BP	GO:0060541	respiratory system development	18/512	267/28943	1.53768e-06	3.77194e-05	2.38111e-05	Wnt5a/Rbpj/Hopx/Gli3/Heg1/Tshz3/Lef1/Pkdcc/Ccbe1/Atp7a/Igf1/Pdgfra/Ano1/Gpc3/Nog/Lipa/Ace/Lif	18
GO:0072009	BP	GO:0072009	nephron epithelium development	12/512	120/28943	1.54492e-06	3.77455e-05	2.38275e-05	Basp1/Pbx1/Gli3/Osr1/Aqp11/Ednrb/Gpc3/Nog/Ptch1/Myc/Wnt6/Lif	12
GO:0021537	BP	GO:0021537	telencephalon development	18/512	268/28943	1.62188e-06	3.92363e-05	2.47687e-05	Wnt5a/Ccdc141/Egfr/Gli3/Zeb2/Zbtb18/Btbd3/Dclk2/Rtn4/Hif1a/Lef1/Cxcl12/Tsku/Zmiz1/Dab2ip/Fut10/Tacc1/Shank3	18
GO:1903522	BP	GO:1903522	regulation of blood circulation	18/512	268/28943	1.62188e-06	3.92363e-05	2.47687e-05	Edn3/Add3/Cacna2d1/Hopx/Mdm4/Cd38/Hif1a/Kcnd3/Ednrb/Atp2b4/Calca/Abl1/Zmpste24/Mef2a/Rgs2/Tgfb2/Ace/Atp1b1	18
GO:0031032	BP	GO:0031032	actomyosin structure organization	16/512	215/28943	1.62521e-06	3.92363e-05	2.47687e-05	Racgap1/Pfn2/Ect2/Frmd6/Dlc1/Cnn3/Synpo/Arrb1/Pdgfra/Ppm1e/Tmod2/Abl1/Mef2a/Ppm1f/Sorbs3/Kank4	16
GO:0050680	BP	GO:0050680	negative regulation of epithelial cell proliferation	15/512	190/28943	1.64495e-06	3.95565e-05	2.49708e-05	Wnt5a/Dab2/Tgfbr3/Ptn/Zeb1/Aqp11/Gpc3/Npm1/Ptch1/Sfrp2/Snai2/Eng/Dab2ip/Tgfb2/Ccl2	15
GO:0051216	BP	GO:0051216	cartilage development	16/512	216/28943	1.72711e-06	4.13693e-05	2.61151e-05	Wnt5a/Gli3/Itgb8/Col11a1/Osr1/Hif1a/Pkdcc/Zeb1/Atp7a/Osr2/Nog/Sfrp2/Snai2/Zmpste24/Pth1r/Tgfb2	16
GO:0051051	BP	GO:0051051	negative regulation of transport	26/512	512/28943	1.87104e-06	4.46418e-05	2.8181e-05	Edn3/Cd36/Kcnab1/Pid1/Spink1/Ank3/Grb10/Ccr2/Slc43a2/Osr1/Abcg2/Pkdcc/Atp7a/Abat/Tcaf2/Sfrp4/Calca/Il13ra2/Maob/Myc/Rgs2/Tgfb2/Ppm1f/Ace/Usp2/Lif	26
GO:0048015	BP	GO:0048015	phosphatidylinositol-mediated signaling	14/512	168/28943	1.92536e-06	4.5759e-05	2.88863e-05	Egfr/Hgf/Selp/Pdgfd/Ube3a/Prex2/Cbl/Igf1/Pdgfra/Prr5l/Dab2ip/Tgfb2/Fn1/Ppp1r16b	14
GO:0048144	BP	GO:0048144	fibroblast proliferation	13/512	145/28943	1.97599e-06	4.67805e-05	2.95311e-05	Wnt5a/Egfr/Pdgfd/Smarca2/Igf1/Pdgfra/Zmiz1/Abl1/Zmpste24/Myc/Dab2ip/Fn1/Lif	13
GO:0003229	BP	GO:0003229	ventricular cardiac muscle tissue development	9/512	65/28943	2.09893e-06	4.94991e-05	3.12472e-05	Col14a1/Rbpj/Tgfbr3/Col11a1/Heg1/Nog/Zmpste24/Eng/Tgfb2	9
GO:0034764	BP	GO:0034764	positive regulation of transmembrane transport	18/512	273/28943	2.10893e-06	4.95437e-05	3.12754e-05	Edn3/Cacna2d1/Ank3/Ccr2/Tcaf1/Asph/Atp7a/Igf1/Gpc3/Cacng4/Abl1/C2cd5/Mef2a/Ccl2/Abcb1b/Atp1b1/Aplnr/Shank3	18
GO:0034220	BP	GO:0034220	ion transmembrane transport	39/512	975/28943	2.2612e-06	5.29173e-05	3.3405e-05	Edn3/Kcnd2/Steap4/Cacna2d1/Kcnab1/Kcnab2/Ank3/Ccr2/Slc43a2/Osr1/Tcaf1/Xcl1/Alg10b/Asph/Scara5/Kcnd3/Atp7a/Ednrb/Ano1/Atp2b4/Ptprc/Tcaf2/Cacng4/Slc30a4/Kcnip3/Calca/Slc19a1/Abl1/Myc/Rgs2/Tgfb2/Ccl2/Ccr5/Abcb1b/Slc6a2/Atp1b1/Aplnr/Shank3/Slc6a6	39
GO:0072089	BP	GO:0072089	stem cell proliferation	13/512	147/28943	2.30459e-06	5.37269e-05	3.39161e-05	Wnt5a/Rbpj/Pbx1/Dab2/Gli3/Osr2/Ptprc/Ptch1/Sfrp2/Snai2/Ace/Abcb1b/Tacc1	13
GO:0043393	BP	GO:0043393	regulation of protein binding	16/512	221/28943	2.32808e-06	5.40682e-05	3.41315e-05	Map2/Wnt5a/Cthrc1/Hopx/Dab2/Tgfbr3/Add1/Caprin2/Arrb1/Nog/Dzip1/Spon1/Abl1/Myc/Mark2/Ace	16
GO:0048017	BP	GO:0048017	inositol lipid-mediated signaling	14/512	171/28943	2.37442e-06	5.49355e-05	3.46791e-05	Egfr/Hgf/Selp/Pdgfd/Ube3a/Prex2/Cbl/Igf1/Pdgfra/Prr5l/Dab2ip/Tgfb2/Fn1/Ppp1r16b	14
GO:1901888	BP	GO:1901888	regulation of cell junction assembly	16/512	222/28943	2.46872e-06	5.69016e-05	3.59202e-05	Wnt5a/Hopx/Gpc6/Dlc1/Lrrn1/Macf1/Slitrk3/Fzd1/Clstn1/Abl1/Snai2/Slk/Ppm1f/Ntng2/Ace/Aplnr	16
GO:0003197	BP	GO:0003197	endocardial cushion development	8/512	50/28943	2.53882e-06	5.82974e-05	3.68013e-05	Rbpj/Mdm4/Nog/Tmem100/Snai2/Eng/Tgfb2/Aplnr	8
GO:0050769	BP	GO:0050769	positive regulation of neurogenesis	19/512	305/28943	2.55495e-06	5.84481e-05	3.68965e-05	Gli3/Mme/Zeb2/Ptn/Caprin2/Vim/Macf1/Rtn4/Hif1a/Sema5a/Igf1/Cxcl12/Nog/Tiam2/Myc/Fn1/Ace/Lif/Shank3	19
GO:0034763	BP	GO:0034763	negative regulation of transmembrane transport	13/512	149/28943	2.68082e-06	6.10986e-05	3.85696e-05	Kcnab1/Pid1/Ank3/Grb10/Slc43a2/Osr1/Atp7a/Tcaf2/Calca/Myc/Rgs2/Tgfb2/Ace	13
GO:0008154	BP	GO:0008154	actin polymerization or depolymerization	15/512	198/28943	2.7483e-06	6.24039e-05	3.93936e-05	Pfn2/Add3/Cobl/Add1/Abi2/Spire1/Shroom2/Sema5a/Gas7/Kirrel/Rdx/Tmod2/Scin/Abl1/Kank4	15
GO:0051336	BP	GO:0051336	regulation of hydrolase activity	39/512	988/28943	3.0961e-06	7.00407e-05	4.42145e-05	Ect2/Vav3/Wnt5a/Hgf/Tfpi2/Ric1/Dlc1/Spink1/Dennd1a/Ralgapa1/Vcan/Pi15/Nedd9/Xcl1/Arrb1/Ralgps2/Fgd1/Asph/Igf1/Pdgfra/Ptprc/Gpc3/Npm1/Wrn/Rdx/Sfrp2/Ptx3/Wfdc3/Abl1/Tiam2/Myc/Rgs2/Dab2ip/Prkd2/Tgfb2/Ccl2/Ppm1f/Tfpi/Simc1	39
GO:0034765	BP	GO:0034765	regulation of ion transmembrane transport	26/512	527/28943	3.16135e-06	7.12529e-05	4.49797e-05	Edn3/Kcnd2/Cacna2d1/Kcnab1/Kcnab2/Ank3/Ccr2/Slc43a2/Osr1/Tcaf1/Asph/Kcnd3/Atp7a/Atp2b4/Tcaf2/Cacng4/Kcnip3/Calca/Abl1/Rgs2/Tgfb2/Ccl2/Abcb1b/Atp1b1/Aplnr/Shank3	26
GO:0001657	BP	GO:0001657	ureteric bud development	11/512	107/28943	3.20433e-06	7.16925e-05	4.52573e-05	Bmper/Pbx1/Gli3/Vcan/Osr1/Tshz3/Gpc3/Nog/Ptch1/Myc/Wnt6	11
GO:0060993	BP	GO:0060993	kidney morphogenesis	11/512	107/28943	3.20433e-06	7.16925e-05	4.52573e-05	Pbx1/Gli3/Osr1/Tshz3/Gpc3/Nog/Ptch1/Zmpste24/Myc/Wnt6/Lif	11
GO:0050767	BP	GO:0050767	regulation of neurogenesis	24/512	463/28943	3.27566e-06	7.3021e-05	4.60959e-05	Map2/Wnt5a/Gli3/Mme/Zeb2/Ptn/Caprin2/Vim/Macf1/Rtn4/Hif1a/Lef1/Sema5a/Igf1/Cxcl12/Nog/Tiam2/Myc/Fn1/Ace/Ccr5/Efnb3/Lif/Shank3	24
GO:0060071	BP	GO:0060071	Wnt signaling pathway, planar cell polarity pathway	7/512	37/28943	3.38309e-06	7.48692e-05	4.72626e-05	Wnt5a/Cthrc1/Dab2/Fzd1/Gpc3/Sfrp2/Abl1	7
GO:0061384	BP	GO:0061384	heart trabecula morphogenesis	7/512	37/28943	3.38309e-06	7.48692e-05	4.72626e-05	Rbpj/Tgfbr3/Heg1/Nog/Adamts1/Eng/Tgfb2	7
GO:0090263	BP	GO:0090263	positive regulation of canonical Wnt signaling pathway	11/512	108/28943	3.51159e-06	7.74325e-05	4.88807e-05	Rbpj/Egfr/Zeb2/Caprin2/Gprc5b/Sema5a/Gpc3/Tnks/Sfrp4/Zbed3/Sfrp2	11
GO:0048638	BP	GO:0048638	regulation of developmental growth	22/512	402/28943	3.53809e-06	7.77362e-05	4.90724e-05	Col14a1/Map2/Wnt5a/Rbpj/Hopx/Tgfbr3/Macf1/Cpne5/Rtn4/Sema5a/Igf1/Ccnd2/Cxcl12/Nog/Ptch1/Abl1/Zmpste24/Rgs2/Gamt/Fn1/Rnf157/Ccr5	22
GO:0033993	BP	GO:0033993	response to lipid	36/512	883/28943	3.66511e-06	8.02383e-05	5.06519e-05	Rorb/Gnai1/Cyp26a1/Gramd1b/Egfr/Dab2/Cd36/Clock/Ube3a/Pid1/Tgfbr3/Add1/Pde2a/Acaca/Vim/Osr1/Ddx17/Tbl1x/Rbfox2/Igf1/Ednrb/Msn/Mrc1/Areg/Zmiz1/Ptch1/Abl1/Snai2/Dab2ip/Tgfb2/Ccl2/Adcy3/Ace/Ccr5/Per1/Mest	36
GO:0016525	BP	GO:0016525	negative regulation of angiogenesis	11/512	109/28943	3.84432e-06	8.3861e-05	5.29389e-05	Tcf4/Stard13/Cd36/Ptn/Ccr2/Atp2b4/Adamts1/Dab2ip/Tgfb2/Ccl2/Lif	11
GO:0007610	BP	GO:0007610	behavior	33/512	776/28943	3.9054e-06	8.48902e-05	5.35886e-05	Kcnd2/Lsamp/Gli3/Mme/Cd36/Kcnab1/Ube3a/Prex2/Penk/Ptn/Synpo/Hif1a/Abi2/Gprc5b/Spire1/Atp7a/Igf1/Ednrb/Abat/Ccnd2/Cxcl12/Nog/Fzd4/Kcnip3/Calca/Tmod2/Abl1/Zmpste24/Adcy3/Ace/Efnb3/Usp2/Shank3	33
GO:0035904	BP	GO:0035904	aorta development	9/512	70/28943	3.9489e-06	8.55315e-05	5.39934e-05	Rbpj/Pde2a/Prdm1/Prickle1/Kat6a/Eng/Sufu/Tgfb2/Aplnr	9
GO:0060412	BP	GO:0060412	ventricular septum morphogenesis	8/512	53/28943	4.00104e-06	8.63546e-05	5.4513e-05	Wnt5a/Rbpj/Tgfbr3/Slit3/Fzd1/Nog/Tgfb2/Aplnr	8
GO:1902904	BP	GO:1902904	negative regulation of supramolecular fiber organization	14/512	179/28943	4.06124e-06	8.73454e-05	5.51384e-05	Pfn2/Map2/Add3/Mid1/Dlc1/Add1/Shroom2/Rdx/Tmod2/Scin/Cdh5/Tpx2/Kank4/Shank3	14
GO:0016358	BP	GO:0016358	dendrite development	19/512	315/28943	4.08463e-06	8.754e-05	5.52613e-05	Map2/Cobl/Ube3a/Prex2/Dclk1/Ppfia2/Ptn/Btbd3/Caprin2/Camk1d/Abi2/Spire1/Atp7a/Rbfox2/Abl1/Mef2a/Dab2ip/Matn2/Shank3	19
GO:0009611	BP	GO:0009611	response to wounding	26/512	535/28943	4.14385e-06	8.84988e-05	5.58665e-05	Pros1/Wnt5a/Cd36/Selp/Tfpi2/Pard3/Ptn/Abi3bp/Ccr2/Macf1/Hif1a/Atp7a/Igf1/Abat/Pdgfra/Myof/Tsku/Nog/Snai2/Eng/Tgfb2/Fn1/Ccl2/Tfpi/Mtr/Matn2	26
GO:0072163	BP	GO:0072163	mesonephric epithelium development	11/512	110/28943	4.20429e-06	8.9166e-05	5.62877e-05	Bmper/Pbx1/Gli3/Vcan/Osr1/Tshz3/Gpc3/Nog/Ptch1/Myc/Wnt6	11
GO:0072164	BP	GO:0072164	mesonephric tubule development	11/512	110/28943	4.20429e-06	8.9166e-05	5.62877e-05	Bmper/Pbx1/Gli3/Vcan/Osr1/Tshz3/Gpc3/Nog/Ptch1/Myc/Wnt6	11
GO:0009101	BP	GO:0009101	glycoprotein biosynthetic process	18/512	287/28943	4.25467e-06	8.99222e-05	5.67651e-05	Uggt2/B3gnt5/Alg10b/St8sia4/Atp7a/St3gal1/Aqp11/Igf1/Tmtc1/Itm2a/Extl3/St6galnac4/Ago2/Ggta1/Poglut1/Fut10/Galnt1/Gfpt2	18
GO:0007411	BP	GO:0007411	axon guidance	17/512	259/28943	4.28238e-06	9.01958e-05	5.69378e-05	Edn3/Lama2/Wnt5a/Ccdc141/Gli3/Ank3/Slit3/Ablim1/Sema5a/Cxcl12/Apbb2/Nog/Ptch1/Tgfb2/Efnb3/Matn2/Notch3	17
GO:2001046	BP	GO:2001046	positive regulation of integrin-mediated signaling pathway	5/512	15/28943	4.40626e-06	9.2486e-05	5.83835e-05	Lama2/Lamc1/Dab2/Nid1/Pcsk5	5
GO:0097485	BP	GO:0097485	neuron projection guidance	17/512	260/28943	4.50847e-06	9.43073e-05	5.95332e-05	Edn3/Lama2/Wnt5a/Ccdc141/Gli3/Ank3/Slit3/Ablim1/Sema5a/Cxcl12/Apbb2/Nog/Ptch1/Tgfb2/Efnb3/Matn2/Notch3	17
GO:0043244	BP	GO:0043244	regulation of protein-containing complex disassembly	12/512	133/28943	4.56913e-06	9.47849e-05	5.98348e-05	Map2/Add3/Mid1/Add1/Asph/Shroom2/Sema5a/Rdx/Tmod2/Scin/Zmpste24/Tpx2	12
GO:2000027	BP	GO:2000027	regulation of animal organ morphogenesis	12/512	133/28943	4.56913e-06	9.47849e-05	5.98348e-05	Wnt5a/Cthrc1/Rbpj/Dab2/Hgf/Apcdd1/Fzd1/Gpc3/Nog/Sfrp2/Abl1/Snai2	12
GO:0008015	BP	GO:0008015	blood circulation	26/512	538/28943	4.57923e-06	9.47849e-05	5.98348e-05	Edn3/Add3/Cacna2d1/Hopx/Cd36/Tgfbr3/Pde2a/Mdm4/Cd38/Hif1a/Kcnd3/Ednrb/Abat/Atp2b4/Ddah1/Calca/Abl1/Zmpste24/Cdh5/Mef2a/Eng/Rgs2/Tgfb2/Ace/Atp1b1/Tac2	26
GO:2000181	BP	GO:2000181	negative regulation of blood vessel morphogenesis	11/512	111/28943	4.59338e-06	9.47849e-05	5.98348e-05	Tcf4/Stard13/Cd36/Ptn/Ccr2/Atp2b4/Adamts1/Dab2ip/Tgfb2/Ccl2/Lif	11
GO:0035088	BP	GO:0035088	establishment or maintenance of apical/basal cell polarity	8/512	54/28943	4.62473e-06	9.47915e-05	5.98389e-05	Wnt5a/Dlg2/Pard3/Lin7a/Prickle2/Msn/Mark2/Fscn1	8
GO:0061245	BP	GO:0061245	establishment or maintenance of bipolar cell polarity	8/512	54/28943	4.62473e-06	9.47915e-05	5.98389e-05	Wnt5a/Dlg2/Pard3/Lin7a/Prickle2/Msn/Mark2/Fscn1	8
GO:0051301	BP	GO:0051301	cell division	29/512	641/28943	4.69988e-06	9.60095e-05	6.06078e-05	Gnai1/Racgap1/Ect2/Pdgfd/Smc5/Pard3/Cdc14a/Klhl13/Ank3/Ptn/Zbtb18/Cenpc1/Nedd9/Lef1/Spire1/Ccnd2/Tnks/Ptch1/Sfrp2/Myc/Ttc28/Tgfb2/Fut10/Pogz/Tacc1/Tpx2/Mad2l2/Spast/Orc6	29
GO:1901343	BP	GO:1901343	negative regulation of vasculature development	11/512	112/28943	5.01356e-06	0.000102076	6.44374e-05	Tcf4/Stard13/Cd36/Ptn/Ccr2/Atp2b4/Adamts1/Dab2ip/Tgfb2/Ccl2/Lif	11
GO:2000050	BP	GO:2000050	regulation of non-canonical Wnt signaling pathway	6/512	26/28943	5.07192e-06	0.000102921	6.49709e-05	Wnt5a/Dab2/Gpc3/Sfrp4/Sfrp2/Abl1	6
GO:0018108	BP	GO:0018108	peptidyl-tyrosine phosphorylation	19/512	320/28943	5.12509e-06	0.000103476	6.53214e-05	Jak1/Egfr/Cd36/Hgf/Pdgfd/Spink1/Nedd9/Abi2/Cbl/Pkdcc/Gprc5b/Igf1/Pdgfra/Ptprc/Areg/Sfrp2/Abl1/Ace/Lif	19
GO:0003018	BP	GO:0003018	vascular process in circulatory system	16/512	235/28943	5.13316e-06	0.000103476	6.53214e-05	Edn3/Add3/Cd36/Tgfbr3/Pde2a/Cd38/Abcg2/Hif1a/Ednrb/Ddah1/Calca/Abl1/Cdh5/Rgs2/Ace/Abcb1b	16
GO:0070371	BP	GO:0070371	ERK1 and ERK2 cascade	20/512	350/28943	5.16199e-06	0.000103715	6.54722e-05	Bmper/Egfr/Dab2/Cd36/Pdgfd/Grb10/Xcl1/Arrb1/Mfhas1/Igf1/Pdgfra/Ptprc/Cxcl12/Abl1/Myc/Dab2ip/Prkd2/Fn1/Ccl2/Lif	20
GO:0090596	BP	GO:0090596	sensory organ morphogenesis	19/512	321/28943	5.35986e-06	0.000107338	6.7759e-05	Rorb/Tenm3/Wnt5a/Cthrc1/Gli3/Ptn/Col11a1/Prdm1/Osr1/Tshz1/Hif1a/Abi2/Zeb1/Slc4a7/Shroom2/Osr2/Tsku/Nog/Myc	19
GO:0009952	BP	GO:0009952	anterior/posterior pattern specification	16/512	236/28943	5.41834e-06	0.000107802	6.80521e-05	Wnt5a/Cobl/Cyp26a1/Rbpj/Pbx1/Gli3/Zeb2/Osr1/Tshz1/Lef1/Pcsk5/Scmh1/Gpc3/Nog/Sfrp2/Poglut1	16
GO:0030324	BP	GO:0030324	lung development	16/512	236/28943	5.41834e-06	0.000107802	6.80521e-05	Wnt5a/Rbpj/Hopx/Gli3/Heg1/Tshz3/Pkdcc/Ccbe1/Atp7a/Igf1/Pdgfra/Gpc3/Nog/Lipa/Ace/Lif	16
GO:0021987	BP	GO:0021987	cerebral cortex development	11/512	113/28943	5.46691e-06	0.000108415	6.84392e-05	Ccdc141/Egfr/Gli3/Zbtb18/Btbd3/Rtn4/Hif1a/Zmiz1/Dab2ip/Fut10/Tacc1	11
GO:0008360	BP	GO:0008360	regulation of cell shape	13/512	159/28943	5.50366e-06	0.000108791	6.86762e-05	Dlc1/Ptn/Fgd1/Coch/Wasf3/Myo10/Msn/Gas7/Rdx/Zmpste24/Mark2/Fn1/Ccl2	13
GO:0018212	BP	GO:0018212	peptidyl-tyrosine modification	19/512	322/28943	5.60429e-06	0.000110423	6.97064e-05	Jak1/Egfr/Cd36/Hgf/Pdgfd/Spink1/Nedd9/Abi2/Cbl/Pkdcc/Gprc5b/Igf1/Pdgfra/Ptprc/Areg/Sfrp2/Abl1/Ace/Lif	19
GO:0010634	BP	GO:0010634	positive regulation of epithelial cell migration	13/512	160/28943	5.89535e-06	0.000115748	7.30682e-05	Has2/Wnt5a/Col18a1/Rtn4/Hif1a/Ccbe1/Sema5a/Igf1/Abl1/Snai2/Prkd2/Tgfb2/Ppm1f	13
GO:0072657	BP	GO:0072657	protein localization to membrane	28/512	614/28943	5.91248e-06	0.000115748	7.30682e-05	Dlg2/Egfr/Dab2/Pid1/Gpc6/Pard3/Ank3/Ptn/Lin7a/Macf1/Slitrk3/Tcaf1/Pkdcc/Aqp11/Atp2b4/Gpc3/Tcaf2/Tram2/Ptch1/Rdx/Kcnip3/Clstn1/C2cd5/Zdhhc2/Nkd2/Ccl2/Atp1b1/Shank3	28
GO:0008361	BP	GO:0008361	regulation of cell size	15/512	211/28943	5.98863e-06	0.000116864	7.37728e-05	Map2/Wnt5a/Add1/Macf1/Rtn4/Atp7a/Sema5a/Aqp11/Cxcl12/Npm1/Rdx/Abl1/Fn1/Ccr5/Shank3	15
GO:0014068	BP	GO:0014068	positive regulation of phosphatidylinositol 3-kinase signaling	9/512	74/28943	6.30445e-06	0.000122636	7.7416e-05	Hgf/Selp/Pdgfd/Ube3a/Cbl/Igf1/Prr5l/Tgfb2/Fn1	9
GO:0032231	BP	GO:0032231	regulation of actin filament bundle assembly	11/512	115/28943	6.48206e-06	0.00012569	7.93443e-05	Pfn2/Dlc1/Synpo/Synpo2/Ppm1e/Rdx/Abl1/Ppm1f/Sorbs3/Kank4/Shank3	11
GO:0048675	BP	GO:0048675	axon extension	12/512	138/28943	6.69673e-06	0.000129352	8.1656e-05	Edn3/Map2/Wnt5a/Dclk1/Macf1/Slit3/Rtn4/Sema5a/Cxcl12/Abl1/Fn1/Ccr5	12
GO:0031345	BP	GO:0031345	negative regulation of cell projection organization	15/512	213/28943	6.71327e-06	0.000129352	8.1656e-05	Pfn2/Map2/Wnt5a/Dab2/Ntm/Ube3a/Ptprg/Vim/Cd38/Rtn4/Sema5a/Tsku/Ccr5/Efnb3/Il15ra	15
GO:0050730	BP	GO:0050730	regulation of peptidyl-tyrosine phosphorylation	17/512	268/28943	6.74024e-06	0.000129464	8.17263e-05	Egfr/Cd36/Hgf/Pdgfd/Spink1/Nedd9/Abi2/Cbl/Gprc5b/Igf1/Pdgfra/Ptprc/Areg/Sfrp2/Abl1/Ace/Lif	17
GO:0045787	BP	GO:0045787	positive regulation of cell cycle	20/512	358/28943	7.21356e-06	0.000138121	8.71912e-05	Edn3/Racgap1/Ect2/Wnt5a/Pbx1/Egfr/Smc5/Cdc14a/Lef1/Igf1/Ccnd2/Brd4/Npm1/Adamts1/Rdx/Abl1/Myc/Tgfb2/Usp2/Spast	20
GO:0061298	BP	GO:0061298	retina vasculature development in camera-type eye	6/512	28/28943	8.05406e-06	0.000153732	9.70461e-05	Cyp1b1/Ndp/Hif1a/Slc4a7/Pdgfra/Fzd4	6
GO:0090175	BP	GO:0090175	regulation of establishment of planar polarity	7/512	42/28943	8.21316e-06	0.00015628	9.86548e-05	Wnt5a/Cthrc1/Dab2/Fzd1/Gpc3/Sfrp2/Abl1	7
GO:0045664	BP	GO:0045664	regulation of neuron differentiation	16/512	244/28943	8.26102e-06	0.000156703	9.89216e-05	Tcf4/Ect2/Pbx1/Gli3/Fez1/Tcf12/Rtn4/Zeb1/Gprc5b/Ednrb/Cxcl12/Sfrp2/Ccr5/Spag9/Cpne1/Notch3	16
GO:0055123	BP	GO:0055123	digestive system development	12/512	141/28943	8.35373e-06	0.000157971	9.9722e-05	Wnt5a/Cobl/Egfr/Gli3/Prdm1/Hif1a/Pkdcc/Pcsk5/Igf1/Ednrb/Pdgfra/Sfrp2	12
GO:0010959	BP	GO:0010959	regulation of metal ion transport	23/512	458/28943	8.75785e-06	0.000165025	0.000104175	Edn3/Cacna2d1/Nkain1/Kcnab1/Kcnab2/Spink1/Ank3/Osr1/Asph/Atp7a/Igf1/Atp2b4/Cxcl12/Kcnip3/Calca/Abl1/Tgfb2/Ccl2/Ace/Per1/Usp2/Atp1b1/Aplnr	23
GO:0060976	BP	GO:0060976	coronary vasculature development	9/512	77/28943	8.78081e-06	0.000165025	0.000104175	Tgfbr3/Pde2a/Prdm1/Prickle1/Pcsk5/Gpc3/Sufu/Ace/Aplnr	9
GO:0098655	BP	GO:0098655	cation transmembrane transport	33/512	810/28943	9.49439e-06	0.000177889	0.000112296	Edn3/Kcnd2/Steap4/Cacna2d1/Kcnab1/Kcnab2/Ank3/Ccr2/Slc43a2/Osr1/Xcl1/Alg10b/Asph/Scara5/Kcnd3/Atp7a/Ednrb/Atp2b4/Ptprc/Cacng4/Slc30a4/Kcnip3/Calca/Abl1/Rgs2/Tgfb2/Ccl2/Ccr5/Slc6a2/Atp1b1/Aplnr/Shank3/Slc6a6	33
GO:0030326	BP	GO:0030326	embryonic limb morphogenesis	12/512	143/28943	9.64865e-06	0.000179677	0.000113424	Wnt5a/Pbx1/Gli3/Aff3/Osr1/Lef1/Osr2/Gpc3/Nog/Ptch1/Sfrp2/Tgfb2	12
GO:0035113	BP	GO:0035113	embryonic appendage morphogenesis	12/512	143/28943	9.64865e-06	0.000179677	0.000113424	Wnt5a/Pbx1/Gli3/Aff3/Osr1/Lef1/Osr2/Gpc3/Nog/Ptch1/Sfrp2/Tgfb2	12
GO:0060537	BP	GO:0060537	muscle tissue development	24/512	494/28943	9.72912e-06	0.000180625	0.000114023	Col14a1/Wnt5a/Rbpj/Tiparp/Tgfbr3/Col11a1/Zbtb18/Heg1/Osr1/Tshz3/Lef1/Ddx17/Igf1/Pdgfra/Ccnd2/Nog/Zmpste24/Mef2a/Eng/Myc/Rgs2/Tgfb2/Poglut1/Usp2	24
GO:0048864	BP	GO:0048864	stem cell development	10/512	99/28943	1.04857e-05	0.000194081	0.000122517	Edn3/Cyp26a1/Zeb2/Kbtbd8/Hif1a/Sema5a/Ednrb/Ptprc/Snai2/Fn1	10
GO:1902532	BP	GO:1902532	negative regulation of intracellular signal transduction	25/512	533/28943	1.15965e-05	0.000213992	0.000135086	Dab2/Dlc1/Spink1/Pde2a/Mdm4/Heg1/Arrb1/Hif1a/Igf1/Atp2b4/Ptprc/Cxcl12/Brd4/Sfrp4/Sfrp2/Abl1/Snai2/Rgs2/Dab2ip/Tgfb2/Rnf157/Per1/Cpne1/Aplnr/Lif	25
GO:0019932	BP	GO:0019932	second-messenger-mediated signaling	18/512	309/28943	1.17132e-05	0.000215495	0.000136035	Edn3/Gnai1/Egfr/Cd36/Selp/Spink1/Pde2a/Ccr2/Igf1/Ednrb/Atp2b4/Ptprc/Tmem100/Zmpste24/Rnf157/Ccr5/Atp1b1/Aplnr	18
GO:1903706	BP	GO:1903706	regulation of hemopoiesis	22/512	435/28943	1.22708e-05	0.000225076	0.000142083	Gli3/Ptn/Prdm1/Ccr2/Smarca2/Hif1a/Lef1/Kat6a/Zeb1/Rbfox2/Atp11c/Ptprc/Zmiz1/Calca/Scin/Abl1/Snai2/Kat6b/Myc/Lif/Cd83/Il15ra	22
GO:0001649	BP	GO:0001649	osteoblast differentiation	15/512	225/28943	1.29449e-05	0.000236022	0.000148994	Rorb/Cthrc1/Suco/Gli3/Tgfbr3/Fzd1/Igf1/Adar/Areg/Nog/Ptch1/Sfrp2/Snai2/Pth1r/Smoc1	15
GO:0070085	BP	GO:0070085	glycosylation	15/512	225/28943	1.29449e-05	0.000236022	0.000148994	Uggt2/B3gnt5/Alg10b/St8sia4/St3gal1/Aqp11/Tmtc1/Extl3/B4galt6/St6galnac4/Ggta1/Poglut1/Fut10/Galnt1/Gfpt2	15
GO:0010035	BP	GO:0010035	response to inorganic substance	25/512	537/28943	1.31537e-05	0.000239115	0.000150946	Ect2/Dlg2/Egfr/Cd36/Hgf/Cyp1b1/Ank3/Add1/Cp/Cpne5/Asph/Atp7a/Ednrb/Abat/Atp2b4/Ptch1/Slc30a4/Kcnip3/Abl1/Mef2a/Syt15/Fn1/Ddi2/Cpne1/Mtr	25
GO:0048844	BP	GO:0048844	artery morphogenesis	9/512	81/28943	1.33406e-05	0.000241793	0.000152636	Rbpj/Prdm1/Rtn4/Kat6a/Nog/Zmiz1/Eng/Tgfb2/Notch3	9
GO:0022411	BP	GO:0022411	cellular component disassembly	22/512	439/28943	1.41331e-05	0.0002554	0.000161226	Map2/Add3/Lamc1/Mid1/Add1/Vps13d/Hif1a/Asph/Shroom2/Adamts15/Sema5a/Rdx/Tmod2/Scin/Snai2/Zmpste24/Eng/Myc/Tgfb2/Tpx2/Fscn1/Spast	22
GO:0006486	BP	GO:0006486	protein glycosylation	14/512	200/28943	1.44941e-05	0.000259619	0.000163889	Uggt2/B3gnt5/Alg10b/St8sia4/St3gal1/Aqp11/Tmtc1/Extl3/St6galnac4/Ggta1/Poglut1/Fut10/Galnt1/Gfpt2	14
GO:0030308	BP	GO:0030308	negative regulation of cell growth	14/512	200/28943	1.44941e-05	0.000259619	0.000163889	Map2/Wnt5a/Dab2/Caprin2/Smarca2/Slit3/Rtn4/Sema5a/Tro/Sfrp2/Rgs2/Dab2ip/Tgfb2/Ccr5	14
GO:0043413	BP	GO:0043413	macromolecule glycosylation	14/512	200/28943	1.44941e-05	0.000259619	0.000163889	Uggt2/B3gnt5/Alg10b/St8sia4/St3gal1/Aqp11/Tmtc1/Extl3/St6galnac4/Ggta1/Poglut1/Fut10/Galnt1/Gfpt2	14
GO:0003208	BP	GO:0003208	cardiac ventricle morphogenesis	9/512	82/28943	1.47533e-05	0.00026272	0.000165847	Rbpj/Tgfbr3/Col11a1/Heg1/Hif1a/Nog/Sfrp2/Eng/Tgfb2	9
GO:1901880	BP	GO:1901880	negative regulation of protein depolymerization	9/512	82/28943	1.47533e-05	0.00026272	0.000165847	Map2/Add3/Mid1/Add1/Shroom2/Rdx/Tmod2/Scin/Tpx2	9
GO:0030947	BP	GO:0030947	regulation of vascular endothelial growth factor receptor signaling pathway	6/512	31/28943	1.50479e-05	0.000266414	0.000168179	Grb10/Hif1a/Myof/Fzd4/Dab2ip/Prkd2	6
GO:0042634	BP	GO:0042634	regulation of hair cycle	6/512	31/28943	1.50479e-05	0.000266414	0.000168179	Wnt5a/Fst/Clock/Tsku/Tgfb2/Per1	6
GO:1901137	BP	GO:1901137	carbohydrate derivative biosynthetic process	27/512	611/28943	1.51581e-05	0.000267589	0.000168921	Has2/Pid1/Acot7/Uggt2/Pygl/B3gnt5/Alg10b/St8sia4/Atp7a/St3gal1/Dctd/Aqp11/Igf1/Tmtc1/Itm2a/Extl3/B4galt6/Myc/St6galnac4/Ago2/Ggta1/Poglut1/Cwh43/Fut10/Adcy3/Galnt1/Gfpt2	27
GO:0051261	BP	GO:0051261	protein depolymerization	11/512	126/28943	1.55505e-05	0.000273724	0.000172793	Map2/Add3/Mid1/Add1/Asph/Shroom2/Sema5a/Rdx/Tmod2/Scin/Tpx2	11
GO:0007229	BP	GO:0007229	integrin-mediated signaling pathway	10/512	104/28943	1.62388e-05	0.00028502	0.000179924	Lama2/Vav3/Lamc1/Dab2/Itgb8/Nid1/Ptn/Pcsk5/Abl1/Fn1	10
GO:0010594	BP	GO:0010594	regulation of endothelial cell migration	13/512	176/28943	1.65134e-05	0.000289008	0.000182442	Bmper/Stard13/Wnt5a/Col18a1/Hif1a/Ccbe1/Sema5a/Igf1/Atp2b4/Abl1/Snai2/Dab2ip/Prkd2	13
GO:0043066	BP	GO:0043066	negative regulation of apoptotic process	37/512	985/28943	1.65864e-05	0.000289457	0.000182725	Wnt5a/Gria4/Egfr/Dab2/Gli3/Hgf/Tgfbr3/Mdm4/Osr1/Cd38/Arrb1/Camk1d/Hif1a/Lef1/Cbl/Tsc22d3/Atp7a/St3gal1/Sema5a/Igf1/Ednrb/Ccnd2/Cxcl12/Adar/Apbb2/Nog/Npm1/Sfrp2/Abl1/Snai2/Cdh5/Tgfb2/Fn1/Ccl2/Rnf157/Ccr5/Fstl1	37
GO:0014911	BP	GO:0014911	positive regulation of smooth muscle cell migration	8/512	64/28943	1.68553e-05	0.000293311	0.000185158	Has2/Pdgfd/Cyp1b1/Pcsk5/Atp7a/Igf1/Adamts1/Myc	8
GO:0010639	BP	GO:0010639	negative regulation of organelle organization	20/512	380/28943	1.7174e-05	0.000298007	0.000188123	Pfn2/Map2/Add3/Hgf/Fez1/Mid1/Dlc1/Add1/Shroom2/Igf1/Tnks/Npm1/Rdx/Tmod2/Scin/Cdh5/Tpx2/Lif/Kank4/Shank3	20
GO:0050920	BP	GO:0050920	regulation of chemotaxis	15/512	231/28943	1.76665e-05	0.000304852	0.000192443	Edn3/Wnt5a/Pdgfd/Ptn/Ccr2/Xcl1/Camk1d/Sema5a/Pdgfra/Cxcl12/Snai2/Prkd2/Fn1/Ccl2/Ppm1f	15
GO:0072080	BP	GO:0072080	nephron tubule development	10/512	105/28943	1.76682e-05	0.000304852	0.000192443	Pbx1/Gli3/Osr1/Aqp11/Gpc3/Nog/Ptch1/Myc/Wnt6/Lif	10
GO:0032272	BP	GO:0032272	negative regulation of protein polymerization	9/512	84/28943	1.7964e-05	0.000309082	0.000195114	Pfn2/Map2/Add3/Add1/Rdx/Tmod2/Scin/Cdh5/Kank4	9
GO:0048565	BP	GO:0048565	digestive tract development	11/512	128/28943	1.80456e-05	0.000309614	0.00019545	Wnt5a/Cobl/Egfr/Gli3/Prdm1/Hif1a/Pkdcc/Pcsk5/Ednrb/Pdgfra/Sfrp2	11
GO:1904062	BP	GO:1904062	regulation of cation transmembrane transport	21/512	414/28943	1.84464e-05	0.000315604	0.000199231	Edn3/Cacna2d1/Kcnab1/Kcnab2/Ank3/Ccr2/Slc43a2/Osr1/Asph/Atp7a/Atp2b4/Cacng4/Kcnip3/Calca/Abl1/Rgs2/Tgfb2/Ccl2/Atp1b1/Aplnr/Shank3	21
GO:0072203	BP	GO:0072203	cell proliferation involved in metanephros development	4/512	10/28943	1.86773e-05	0.000318638	0.000201146	Osr1/Gpc3/Ptch1/Myc	4
GO:0072503	BP	GO:0072503	cellular divalent inorganic cation homeostasis	18/512	320/28943	1.87281e-05	0.000318638	0.000201146	Edn3/Wnt5a/Ccr2/Xcl1/Asph/Atp2b4/Ptprc/Slc30a4/Calca/Clstn1/Abl1/Cdh5/Pth1r/Tgfb2/Ccl2/Ccr5/Atp1b1/Aplnr	18
GO:0046323	BP	GO:0046323	glucose import	9/512	85/28943	1.97804e-05	0.000334678	0.000211271	Pid1/Grb10/Igf1/Gpc3/Slc2a3/C2cd5/Mef2a/Myc/Ace	9
GO:0060411	BP	GO:0060411	cardiac septum morphogenesis	9/512	85/28943	1.97804e-05	0.000334678	0.000211271	Wnt5a/Rbpj/Tgfbr3/Slit3/Fzd1/Nog/Eng/Tgfb2/Aplnr	9
GO:0061351	BP	GO:0061351	neural precursor cell proliferation	14/512	206/28943	2.0192e-05	0.000340698	0.000215072	Racgap1/Wnt5a/Gli3/Zeb2/Ptn/Hif1a/Lef1/Igf1/Nog/Zfp423/Ccr5/Eml1/Tacc1/Shank3	14
GO:0048732	BP	GO:0048732	gland development	23/512	483/28943	2.0384e-05	0.000341358	0.000215488	Wnt5a/Cobl/Rbpj/Pbx1/Arid5b/Egfr/Gli3/Hgf/Ube3a/Tgfbr3/Ptn/Rtn4/Hif1a/Lef1/Igf1/Pdgfra/Msn/Areg/Nog/Ptch1/Abl1/Snai2/Zmpste24	23
GO:0003382	BP	GO:0003382	epithelial cell morphogenesis	7/512	48/28943	2.04546e-05	0.000341358	0.000215488	Frmd6/Col18a1/Pard3/Palld/Col22a1/Heg1/Col15a1	7
GO:0045197	BP	GO:0045197	establishment or maintenance of epithelial cell apical/basal polarity	7/512	48/28943	2.04546e-05	0.000341358	0.000215488	Wnt5a/Dlg2/Pard3/Lin7a/Prickle2/Msn/Mark2	7
GO:0048010	BP	GO:0048010	vascular endothelial growth factor receptor signaling pathway	7/512	48/28943	2.04546e-05	0.000341358	0.000215488	Grb10/Hif1a/Myof/Fzd4/Dab2ip/Prkd2/Ccl2	7
GO:0006874	BP	GO:0006874	cellular calcium ion homeostasis	17/512	292/28943	2.05285e-05	0.000341656	0.000215677	Edn3/Wnt5a/Ccr2/Xcl1/Asph/Atp2b4/Ptprc/Calca/Clstn1/Abl1/Cdh5/Pth1r/Tgfb2/Ccl2/Ccr5/Atp1b1/Aplnr	17
GO:0032835	BP	GO:0032835	glomerulus development	8/512	66/28943	2.12069e-05	0.000351988	0.000222199	Basp1/Pdgfd/Nid1/Osr1/Ednrb/Pdgfra/Nog/Notch3	8
GO:0070302	BP	GO:0070302	regulation of stress-activated protein kinase signaling cascade	14/512	207/28943	2.13125e-05	0.000352783	0.000222701	Wnt5a/Egfr/Dab2/Hgf/Mid1/Eda2r/Ccr2/Mfhas1/Sfrp4/Sfrp2/Zmpste24/Dab2ip/Tgfb2/Per1	14
GO:0003151	BP	GO:0003151	outflow tract morphogenesis	9/512	86/28943	2.17505e-05	0.000358092	0.000226053	Wnt5a/Rbpj/Tgfbr3/Hif1a/Fzd1/Nog/Sfrp2/Eng/Tgfb2	9
GO:0060415	BP	GO:0060415	muscle tissue morphogenesis	9/512	86/28943	2.17505e-05	0.000358092	0.000226053	Wnt5a/Rbpj/Tgfbr3/Col11a1/Heg1/Fzd1/Nog/Eng/Tgfb2	9
GO:0060627	BP	GO:0060627	regulation of vesicle-mediated transport	27/512	624/28943	2.19128e-05	0.000359795	0.000227127	Pfn2/Pros1/Wnt5a/Dab2/Cd36/Pard3/Ppfia2/Add1/Nrn1/Ccr2/Arrb1/Camk1d/Cbl/Pkdcc/Msn/Ptprc/Gpc3/Sfrp4/Rdx/Ptx3/C2cd5/Zdhhc2/Il13ra2/Masp1/Syt15/Ccl2/Il15ra	27
GO:0071396	BP	GO:0071396	cellular response to lipid	28/512	660/28943	2.20361e-05	0.000360849	0.000227793	Rorb/Gnai1/Cyp26a1/Gramd1b/Egfr/Dab2/Cd36/Clock/Ube3a/Pid1/Add1/Pde2a/Acaca/Vim/Osr1/Ddx17/Rbfox2/Igf1/Msn/Mrc1/Zmiz1/Ptch1/Abl1/Snai2/Dab2ip/Ccl2/Adcy3/Per1	28
GO:0050770	BP	GO:0050770	regulation of axonogenesis	13/512	181/28943	2.22282e-05	0.000363021	0.000229164	Map2/Wnt5a/Zeb2/Vim/Macf1/Rtn4/Sema5a/Cxcl12/Tiam2/Mark2/Fn1/Ccr5/Efnb3	13
GO:0070372	BP	GO:0070372	regulation of ERK1 and ERK2 cascade	18/512	326/28943	2.3962e-05	0.000390293	0.00024638	Bmper/Egfr/Dab2/Cd36/Pdgfd/Xcl1/Arrb1/Mfhas1/Igf1/Pdgfra/Ptprc/Cxcl12/Abl1/Dab2ip/Prkd2/Fn1/Ccl2/Lif	18
GO:0022612	BP	GO:0022612	gland morphogenesis	12/512	157/28943	2.47392e-05	0.000400815	0.000253022	Wnt5a/Egfr/Gli3/Hgf/Ptn/Rtn4/Igf1/Msn/Areg/Nog/Ptch1/Snai2	12
GO:0051147	BP	GO:0051147	regulation of muscle cell differentiation	12/512	157/28943	2.47392e-05	0.000400815	0.000253022	Lama2/Lamc1/Hopx/Nid1/Atp11a/Tshz3/Zeb1/Igf1/Ccnd2/Tcf23/Eng/Rgs2	12
GO:0072507	BP	GO:0072507	divalent inorganic cation homeostasis	19/512	359/28943	2.57169e-05	0.000414496	0.000261659	Edn3/Wnt5a/Ank3/Ccr2/Xcl1/Asph/Atp2b4/Ptprc/Slc30a4/Calca/Clstn1/Abl1/Cdh5/Pth1r/Tgfb2/Ccl2/Ccr5/Atp1b1/Aplnr	19
GO:0006954	BP	GO:0006954	inflammatory response	31/512	776/28943	2.57194e-05	0.000414496	0.000261659	Wnt5a/Rbpj/Nkg7/Hgf/Selp/Clock/Ptn/Pde2a/Abi3bp/Rps6ka5/Ccr2/Xcl1/Camk1d/Rtn4/Hif1a/Gprc5b/Mfhas1/Igf1/Ednrb/Chst2/Brd4/Lipa/Calca/Cdh5/Dab2ip/Fn1/Ccl2/Ace/Ccr5/Per1/Ciita	31
GO:0072088	BP	GO:0072088	nephron epithelium morphogenesis	9/512	88/28943	2.61944e-05	0.000421041	0.00026579	Pbx1/Gli3/Osr1/Gpc3/Nog/Ptch1/Myc/Wnt6/Lif	9
GO:0090068	BP	GO:0090068	positive regulation of cell cycle process	16/512	269/28943	2.75767e-05	0.000442095	0.000279081	Edn3/Racgap1/Ect2/Wnt5a/Pbx1/Egfr/Smc5/Cdc14a/Lef1/Igf1/Ccnd2/Brd4/Npm1/Adamts1/Rdx/Spast	16
GO:0014032	BP	GO:0014032	neural crest cell development	9/512	89/28943	2.86906e-05	0.000456925	0.000288443	Edn3/Cyp26a1/Zeb2/Kbtbd8/Hif1a/Sema5a/Ednrb/Snai2/Fn1	9
GO:0014909	BP	GO:0014909	smooth muscle cell migration	10/512	111/28943	2.87262e-05	0.000456925	0.000288443	Has2/Pdgfd/Cyp1b1/Grb10/Pcsk5/Atp7a/Igf1/Adamts1/Myc/Ace	10
GO:0061326	BP	GO:0061326	renal tubule development	10/512	111/28943	2.87262e-05	0.000456925	0.000288443	Pbx1/Gli3/Osr1/Aqp11/Gpc3/Nog/Ptch1/Myc/Wnt6/Lif	10
GO:0010749	BP	GO:0010749	regulation of nitric oxide mediated signal transduction	4/512	11/28943	2.89392e-05	0.00045793	0.000289077	Egfr/Spink1/Pde2a/Atp2b4	4
GO:0061299	BP	GO:0061299	retina vasculature morphogenesis in camera-type eye	4/512	11/28943	2.89392e-05	0.00045793	0.000289077	Cyp1b1/Ndp/Slc4a7/Fzd4	4
GO:0034767	BP	GO:0034767	positive regulation of ion transmembrane transport	14/512	213/28943	2.92584e-05	0.000461783	0.000291509	Edn3/Cacna2d1/Ank3/Ccr2/Tcaf1/Asph/Atp7a/Cacng4/Abl1/Ccl2/Abcb1b/Atp1b1/Aplnr/Shank3	14
GO:0022029	BP	GO:0022029	telencephalon cell migration	8/512	69/28943	2.94758e-05	0.000462823	0.000292166	Ccdc141/Egfr/Gli3/Rtn4/Cxcl12/Zmiz1/Dab2ip/Fut10	8
GO:0046324	BP	GO:0046324	regulation of glucose import	8/512	69/28943	2.94758e-05	0.000462823	0.000292166	Pid1/Grb10/Igf1/Gpc3/C2cd5/Mef2a/Myc/Ace	8
GO:0035051	BP	GO:0035051	cardiocyte differentiation	13/512	186/28943	2.96053e-05	0.000463125	0.000292357	Col14a1/Rbpj/Egfr/Tgfbr3/Abi3bp/Prickle1/Igf1/Pdgfra/Ccnd2/Zmpste24/Mef2a/Rgs2/Tgfb2	13
GO:0032414	BP	GO:0032414	positive regulation of ion transmembrane transporter activity	11/512	135/28943	2.97092e-05	0.000463125	0.000292357	Cacna2d1/Ank3/Ccr2/Tcaf1/Asph/Atp7a/Cacng4/Ccl2/Abcb1b/Atp1b1/Shank3	11
GO:0002687	BP	GO:0002687	positive regulation of leukocyte migration	12/512	160/28943	2.98488e-05	0.000463125	0.000292357	Edn3/Wnt5a/Selp/Pdgfd/Ptn/Ccr2/Jam2/Xcl1/Camk1d/Rtn4/Cxcl12/Ccl2	12
GO:0007268	BP	GO:0007268	chemical synaptic transmission	34/512	896/28943	2.98742e-05	0.000463125	0.000292357	Edn3/Gnai1/Lama2/Pfn2/Dlg2/Cdh11/Gria4/Mme/Penk/Ppfia2/Ptn/Lin7a/Nrn1/Synpo/Ccr2/Dlgap4/Cd38/Slitrk3/Erc1/Tshz3/Abat/Nog/Cacng4/Tmod2/Clstn1/Abl1/Zdhhc2/Ccl2/Ntng2/Sorcs2/Slc6a2/Efnb3/Shank3/Slc6a6	34
GO:0098916	BP	GO:0098916	anterograde trans-synaptic signaling	34/512	896/28943	2.98742e-05	0.000463125	0.000292357	Edn3/Gnai1/Lama2/Pfn2/Dlg2/Cdh11/Gria4/Mme/Penk/Ppfia2/Ptn/Lin7a/Nrn1/Synpo/Ccr2/Dlgap4/Cd38/Slitrk3/Erc1/Tshz3/Abat/Nog/Cacng4/Tmod2/Clstn1/Abl1/Zdhhc2/Ccl2/Ntng2/Sorcs2/Slc6a2/Efnb3/Shank3/Slc6a6	34
GO:0071560	BP	GO:0071560	cellular response to transforming growth factor beta stimulus	15/512	242/28943	3.03952e-05	0.000469867	0.000296612	Dab2/Pdgfd/Itgb8/Tgfbr3/Zeb2/Xcl1/Zeb1/Tsku/Zmiz1/Zfyve9/Zfp451/Cdh5/Eng/Tgfb2/Ccl2	15
GO:0018105	BP	GO:0018105	peptidyl-serine phosphorylation	18/512	332/28943	3.04629e-05	0.000469867	0.000296612	Pfn2/Wnt5a/Egfr/Hgf/Dclk1/Rps6ka5/Caprin2/Dclk2/Arrb1/Camk1d/Atp2b4/Tnks/Sfrp2/Mark2/Prkd2/Ppm1f/Mad2l2/Lif	18
GO:1905477	BP	GO:1905477	positive regulation of protein localization to membrane	10/512	112/28943	3.10509e-05	0.00047773	0.000301576	Egfr/Ank3/Ptn/Tcaf1/Atp2b4/Tcaf2/C2cd5/Zdhhc2/Nkd2/Ccl2	10
GO:0072028	BP	GO:0072028	nephron morphogenesis	9/512	90/28943	3.13855e-05	0.000481666	0.00030406	Pbx1/Gli3/Osr1/Gpc3/Nog/Ptch1/Myc/Wnt6/Lif	9
GO:0001816	BP	GO:0001816	cytokine production	33/512	861/28943	3.21754e-05	0.000492549	0.000310931	Zbtb20/Wnt5a/Rbpj/Cd36/Hgf/Clec4a2/Itgb8/Cyp1b1/Heg1/Ccr2/Xcl1/Arrb1/Rtn4/Hif1a/Lef1/Gprc5b/Ccbe1/Pcsk5/Igf1/Ptprc/Tsku/Lipa/Calca/Abl1/Snai2/Prkd2/Tgfb2/Fn1/Ccl2/Ccr5/Mr1/Per1/Cd83	33
GO:0000278	BP	GO:0000278	mitotic cell cycle	34/512	900/28943	3.26507e-05	0.000498577	0.000314736	Edn3/Gnai1/Racgap1/Ect2/Pbx1/Egfr/Ppp2r5c/Smc5/Cdc14a/Ank3/Foxn3/Cenpc1/Smarca2/Igf1/Ccnd2/Fbxl3/Brd4/Tnks/Adamts1/Hus1/Ptch1/Rdx/Abl1/Zmpste24/Myc/Ttc28/Ccl2/Pogz/Abcb1b/Eml1/Tacc1/Tpx2/Usp2/Spast	34
GO:0001656	BP	GO:0001656	metanephros development	9/512	91/28943	3.42918e-05	0.00052233	0.000329731	Gli3/Osr1/Tshz3/Pdgfra/Osr2/Gpc3/Ptch1/Myc/Lif	9
GO:0009314	BP	GO:0009314	response to radiation	21/512	432/28943	3.44004e-05	0.000522681	0.000329952	Ect2/Egfr/Mme/Clock/Synpo/Arrb1/Hif1a/Sema5a/Ccnd2/Fbxl3/Ptprc/Nog/Npm1/Hus1/Wrn/Sfrp2/Snai2/Zmpste24/Myc/Per1/Usp2	21
GO:0072111	BP	GO:0072111	cell proliferation involved in kidney development	5/512	22/28943	3.48782e-05	0.000528626	0.000333705	Pdgfd/Osr1/Gpc3/Ptch1/Myc	5
GO:0061005	BP	GO:0061005	cell differentiation involved in kidney development	7/512	52/28943	3.49687e-05	0.000528685	0.000333743	Basp1/Gli3/Osr1/Tshz3/Ednrb/Ptch1/Lif	7
GO:0099537	BP	GO:0099537	trans-synaptic signaling	34/512	904/28943	3.56605e-05	0.000537813	0.000339505	Edn3/Gnai1/Lama2/Pfn2/Dlg2/Cdh11/Gria4/Mme/Penk/Ppfia2/Ptn/Lin7a/Nrn1/Synpo/Ccr2/Dlgap4/Cd38/Slitrk3/Erc1/Tshz3/Abat/Nog/Cacng4/Tmod2/Clstn1/Abl1/Zdhhc2/Ccl2/Ntng2/Sorcs2/Slc6a2/Efnb3/Shank3/Slc6a6	34
GO:0033135	BP	GO:0033135	regulation of peptidyl-serine phosphorylation	12/512	163/28943	3.58514e-05	0.000538076	0.00033967	Pfn2/Wnt5a/Egfr/Hgf/Caprin2/Arrb1/Atp2b4/Sfrp2/Prkd2/Ppm1f/Mad2l2/Lif	12
GO:0007017	BP	GO:0007017	microtubule-based process	35/512	943/28943	3.58541e-05	0.000538076	0.00033967	Gnai1/Racgap1/Map2/Dlg2/Dync1i1/Fez1/Pard3/Mid1/Cdc14a/Map7d2/Ktn1/Macf1/Dclk2/Hif1a/Xpo1/Spire1/Stard9/Atp2b4/Lrrc49/Ccdc170/Tnks/Npm1/Zbed3/Dzip1/Meig1/Abl1/Cdh5/Slk/Mark2/Adcy3/Eml1/Tacc1/Tpx2/Tac2/Spast	35
GO:0071559	BP	GO:0071559	response to transforming growth factor beta	15/512	246/28943	3.67194e-05	0.000549243	0.00034672	Dab2/Pdgfd/Itgb8/Tgfbr3/Zeb2/Xcl1/Zeb1/Tsku/Zmiz1/Zfyve9/Zfp451/Cdh5/Eng/Tgfb2/Ccl2	15
GO:0007264	BP	GO:0007264	small GTPase mediated signal transduction	21/512	434/28943	3.67781e-05	0.000549243	0.00034672	Racgap1/Vav3/Stard13/Elmo1/Dlc1/Dennd1a/Ralgapa1/Heg1/Arhgap31/Arrb1/Rtn4/Ralgps2/Abi2/Cbl/Igf1/Abl1/Tiam2/Farp2/Dab2ip/Tgfb2/Inf2	21
GO:0010719	BP	GO:0010719	negative regulation of epithelial to mesenchymal transition	6/512	36/28943	3.6936e-05	0.000550256	0.00034736	Tgfbr3/Nog/Sfrp2/Dab2ip/Tgfb2/Mad2l2	6
GO:1903047	BP	GO:1903047	mitotic cell cycle process	30/512	754/28943	3.73266e-05	0.000554722	0.000350178	Edn3/Gnai1/Racgap1/Ect2/Pbx1/Egfr/Ppp2r5c/Smc5/Cdc14a/Ank3/Foxn3/Cenpc1/Smarca2/Igf1/Ccnd2/Fbxl3/Brd4/Tnks/Adamts1/Hus1/Rdx/Zmpste24/Myc/Ccl2/Pogz/Abcb1b/Eml1/Tacc1/Tpx2/Spast	30
GO:0043242	BP	GO:0043242	negative regulation of protein-containing complex disassembly	9/512	92/28943	3.74227e-05	0.0005548	0.000350228	Map2/Add3/Mid1/Add1/Shroom2/Rdx/Tmod2/Scin/Tpx2	9
GO:0046631	BP	GO:0046631	alpha-beta T cell activation	13/512	191/28943	3.90379e-05	0.000577346	0.00036446	Nkg7/Gli3/Clec4a2/Prdm1/Ccr2/Xcl1/Lef1/Satb1/Atp7a/Ptprc/Abl1/Myc/Cd83	13
GO:0021885	BP	GO:0021885	forebrain cell migration	8/512	72/28943	4.02851e-05	0.000592918	0.000374291	Ccdc141/Egfr/Gli3/Rtn4/Cxcl12/Zmiz1/Dab2ip/Fut10	8
GO:0055008	BP	GO:0055008	cardiac muscle tissue morphogenesis	8/512	72/28943	4.02851e-05	0.000592918	0.000374291	Wnt5a/Rbpj/Tgfbr3/Col11a1/Heg1/Nog/Eng/Tgfb2	8
GO:1904659	BP	GO:1904659	glucose transmembrane transport	10/512	116/28943	4.20314e-05	0.000617134	0.000389578	Pid1/Grb10/Slc2a12/Igf1/Gpc3/Slc2a3/C2cd5/Mef2a/Myc/Ace	10
GO:0035640	BP	GO:0035640	exploration behavior	6/512	37/28943	4.34301e-05	0.000636142	0.000401576	Lsamp/Ube3a/Penk/Abat/Nog/Shank3	6
GO:2001044	BP	GO:2001044	regulation of integrin-mediated signaling pathway	5/512	23/28943	4.39204e-05	0.000641784	0.000405138	Lama2/Lamc1/Dab2/Nid1/Pcsk5	5
GO:0021795	BP	GO:0021795	cerebral cortex cell migration	7/512	54/28943	4.49024e-05	0.000654567	0.000413208	Ccdc141/Egfr/Gli3/Rtn4/Zmiz1/Dab2ip/Fut10	7
GO:0008645	BP	GO:0008645	hexose transmembrane transport	10/512	117/28943	4.52439e-05	0.000657976	0.000415359	Pid1/Grb10/Slc2a12/Igf1/Gpc3/Slc2a3/C2cd5/Mef2a/Myc/Ace	10
GO:0051099	BP	GO:0051099	positive regulation of binding	13/512	194/28943	4.58742e-05	0.000665557	0.000420145	Wnt5a/Cthrc1/Add1/Caprin2/Hmbox1/Arrb1/Igf1/Brd4/Spon1/Abl1/Myc/Tgfb2/Ace	13
GO:0030856	BP	GO:0030856	regulation of epithelial cell differentiation	12/512	168/28943	4.81924e-05	0.000697534	0.000440331	Fst/Akap11/Zeb2/Add1/Osr1/Zeb1/Tmem100/Sfrp4/Ptch1/Cdh5/Tgfb2/Lif	12
GO:1990778	BP	GO:1990778	protein localization to cell periphery	19/512	377/28943	4.98354e-05	0.000719609	0.000454267	Gnai1/Dlg2/Egfr/Dab2/Pid1/Gpc6/Ank3/Lin7a/Macf1/Pkdcc/Atp2b4/Ptch1/Rdx/Kcnip3/Clstn1/C2cd5/Zdhhc2/Nkd2/Atp1b1	19
GO:0032411	BP	GO:0032411	positive regulation of transporter activity	11/512	143/28943	5.05193e-05	0.000726558	0.000458653	Cacna2d1/Ank3/Ccr2/Tcaf1/Asph/Atp7a/Cacng4/Ccl2/Abcb1b/Atp1b1/Shank3	11
GO:0001974	BP	GO:0001974	blood vessel remodeling	7/512	55/28943	5.06735e-05	0.000726558	0.000458653	Rbpj/Tgfbr3/Ccr2/Atp7a/Igf1/Tgfb2/Lif	7
GO:0055010	BP	GO:0055010	ventricular cardiac muscle tissue morphogenesis	7/512	55/28943	5.06735e-05	0.000726558	0.000458653	Rbpj/Tgfbr3/Col11a1/Heg1/Nog/Eng/Tgfb2	7
GO:0022617	BP	GO:0022617	extracellular matrix disassembly	6/512	38/28943	5.08075e-05	0.000726773	0.000458789	Lamc1/Adamts15/Sema5a/Eng/Tgfb2/Fscn1	6
GO:0030041	BP	GO:0030041	actin filament polymerization	12/512	169/28943	5.1059e-05	0.000728665	0.000459983	Pfn2/Add3/Cobl/Add1/Spire1/Gas7/Kirrel/Rdx/Tmod2/Scin/Abl1/Kank4	12
GO:0008585	BP	GO:0008585	female gonad development	10/512	119/28943	5.2301e-05	0.000738555	0.000466227	Arid5b/Fst/Tiparp/Ube3a/Arrb1/Pdgfra/Pcyt1b/Fzd4/Adamts1/Ptx3	10
GO:0022404	BP	GO:0022404	molting cycle process	10/512	119/28943	5.2301e-05	0.000738555	0.000466227	Wnt5a/Lamc1/Rbpj/Fst/Egfr/Apcdd1/Atp7a/Zmpste24/Farp2/Tgfb2	10
GO:0022405	BP	GO:0022405	hair cycle process	10/512	119/28943	5.2301e-05	0.000738555	0.000466227	Wnt5a/Lamc1/Rbpj/Fst/Egfr/Apcdd1/Atp7a/Zmpste24/Farp2/Tgfb2	10
GO:0045666	BP	GO:0045666	positive regulation of neuron differentiation	10/512	119/28943	5.2301e-05	0.000738555	0.000466227	Tcf4/Ect2/Fez1/Tcf12/Zeb1/Gprc5b/Cxcl12/Ccr5/Spag9/Cpne1	10
GO:0010717	BP	GO:0010717	regulation of epithelial to mesenchymal transition	9/512	96/28943	5.24776e-05	0.000738555	0.000466227	Dab2/Tgfbr3/Lef1/Nog/Sfrp2/Eng/Dab2ip/Tgfb2/Mad2l2	9
GO:0061053	BP	GO:0061053	somite development	9/512	96/28943	5.24776e-05	0.000738555	0.000466227	Wnt5a/Cobl/Rbpj/Zeb2/Lef1/Nog/Ptch1/Sfrp2/Poglut1	9
GO:0071248	BP	GO:0071248	cellular response to metal ion	12/512	170/28943	5.40719e-05	0.000759244	0.000479287	Ect2/Dlg2/Egfr/Ank3/Add1/Cpne5/Asph/Atp7a/Mef2a/Syt15/Fn1/Cpne1	12
GO:0071479	BP	GO:0071479	cellular response to ionizing radiation	8/512	75/28943	5.42178e-05	0.000759546	0.000479478	Ect2/Clock/Ccnd2/Hus1/Wrn/Sfrp2/Snai2/Zmpste24	8
GO:0015749	BP	GO:0015749	monosaccharide transmembrane transport	10/512	120/28943	5.61675e-05	0.00078506	0.000495584	Pid1/Grb10/Slc2a12/Igf1/Gpc3/Slc2a3/C2cd5/Mef2a/Myc/Ace	10
GO:0051302	BP	GO:0051302	regulation of cell division	13/512	198/28943	5.65962e-05	0.000789245	0.000498226	Racgap1/Ect2/Pdgfd/Cdc14a/Klhl13/Ptn/Zbtb18/Ptch1/Sfrp2/Myc/Tgfb2/Spast/Orc6	13
GO:0021954	BP	GO:0021954	central nervous system neuron development	9/512	97/28943	5.69512e-05	0.000791792	0.000499834	Map2/Cdh11/Dclk1/Zeb2/Dclk2/Atp7a/Tsku/Zmiz1/B4galt6	9
GO:0030834	BP	GO:0030834	regulation of actin filament depolymerization	7/512	56/28943	5.70381e-05	0.000791792	0.000499834	Add3/Add1/Shroom2/Sema5a/Rdx/Tmod2/Scin	7
GO:0070374	BP	GO:0070374	positive regulation of ERK1 and ERK2 cascade	14/512	227/28943	5.86041e-05	0.000811686	0.000512392	Bmper/Egfr/Cd36/Pdgfd/Xcl1/Arrb1/Mfhas1/Igf1/Pdgfra/Ptprc/Cxcl12/Abl1/Prkd2/Ccl2	14
GO:0008016	BP	GO:0008016	regulation of heart contraction	13/512	199/28943	5.95945e-05	0.000823536	0.000519873	Edn3/Cacna2d1/Hopx/Mdm4/Kcnd3/Ednrb/Atp2b4/Calca/Zmpste24/Mef2a/Rgs2/Tgfb2/Atp1b1	13
GO:0006816	BP	GO:0006816	calcium ion transport	21/512	449/28943	5.98365e-05	0.000825014	0.000520806	Cacna2d1/Spink1/Xcl1/Asph/Igf1/Ednrb/Atp2b4/Ptprc/Cxcl12/Cacng4/Calca/Abl1/Zmpste24/Tgfb2/Ccl2/Srl/Ace/Ccr5/Usp2/Atp1b1/Aplnr	21
GO:0150011	BP	GO:0150011	regulation of neuron projection arborization	4/512	13/28943	6.09604e-05	0.000836733	0.000528203	Wnt5a/Macf1/Fzd4/Ntng2	4
GO:1903651	BP	GO:1903651	positive regulation of cytoplasmic transport	4/512	13/28943	6.09604e-05	0.000836733	0.000528203	Map2/Dab2/Msn/Rdx	4
GO:0061383	BP	GO:0061383	trabecula morphogenesis	7/512	57/28943	6.40418e-05	0.000877056	0.000553658	Rbpj/Tgfbr3/Heg1/Nog/Adamts1/Eng/Tgfb2	7
GO:0043534	BP	GO:0043534	blood vessel endothelial cell migration	10/512	122/28943	6.46348e-05	0.000881226	0.00055629	Stard13/Col18a1/Cyp1b1/Hif1a/Igf1/Atp2b4/Cxcl12/Abl1/Cdh5/Prkd2	10
GO:0046545	BP	GO:0046545	development of primary female sexual characteristics	10/512	122/28943	6.46348e-05	0.000881226	0.00055629	Arid5b/Fst/Tiparp/Ube3a/Arrb1/Pdgfra/Pcyt1b/Fzd4/Adamts1/Ptx3	10
GO:0048706	BP	GO:0048706	embryonic skeletal system development	11/512	147/28943	6.49542e-05	0.000881644	0.000556555	Wnt5a/Pbx1/Gli3/Col11a1/Osr1/Zeb1/Pcsk5/Pdgfra/Osr2/Nog/Tgfb2	11
GO:0090101	BP	GO:0090101	negative regulation of transmembrane receptor protein serine/threonine kinase signaling pathway	11/512	147/28943	6.49542e-05	0.000881644	0.000556555	Bmper/Wnt5a/Fst/Tgfbr3/Fzd1/Tsku/Nog/Sfrp2/Zfp451/Abl1/Eng	11
GO:0043086	BP	GO:0043086	negative regulation of catalytic activity	27/512	666/28943	6.64811e-05	0.00090037	0.000568375	Hgf/Tfpi2/Spink1/Heg1/Pi15/Arrb1/Cbl/Igf1/Atp2b4/Ptprc/Gpc3/Adar/Ppm1e/Npm1/Rdx/Sfrp2/Ptx3/Wfdc3/Abl1/Eng/Rgs2/Dab2ip/Tgfb2/Ppm1f/Tfpi/Mad2l2/Simc1	27
GO:0051222	BP	GO:0051222	positive regulation of protein transport	17/512	321/28943	6.71728e-05	0.000906147	0.000572022	Ect2/Gli3/Ank3/Cd38/Tcaf1/Arrb1/Hif1a/Asph/Igf1/Abat/Ano1/Tcaf2/Prr5l/C2cd5/Zdhhc2/Tgfb2/Ccl2	17
GO:0007263	BP	GO:0007263	nitric oxide mediated signal transduction	5/512	25/28943	6.73528e-05	0.000906147	0.000572022	Egfr/Cd36/Spink1/Pde2a/Atp2b4	5
GO:0044331	BP	GO:0044331	cell-cell adhesion mediated by cadherin	5/512	25/28943	6.73528e-05	0.000906147	0.000572022	Wnt5a/Adam19/Cdh5/Ppm1f/Mad2l2	5
GO:0002521	BP	GO:0002521	leukocyte differentiation	27/512	667/28943	6.81647e-05	0.000915055	0.000577645	Nfil3/Rbpj/Pbx1/Gli3/Itgb8/Prdm1/Ccr2/Smarca2/Lef1/Satb1/Zeb1/Atp7a/St3gal1/Atp11c/Itm2a/Ptprc/Gpc3/Zmiz1/Calca/Abl1/Myc/Farp2/Sh3pxd2a/Mr1/Lif/Cd83/Il15ra	27
GO:0021799	BP	GO:0021799	cerebral cortex radially oriented cell migration	6/512	40/28943	6.85602e-05	0.000918346	0.000579723	Ccdc141/Gli3/Rtn4/Zmiz1/Dab2ip/Fut10	6
GO:0007179	BP	GO:0007179	transforming growth factor beta receptor signaling pathway	13/512	202/28943	6.94325e-05	0.000925968	0.000584535	Dab2/Itgb8/Tgfbr3/Zeb2/Zeb1/Tsku/Zmiz1/Zfyve9/Zfp451/Cdh5/Eng/Tgfb2/Ccl2	13
GO:0051495	BP	GO:0051495	positive regulation of cytoskeleton organization	13/512	202/28943	6.94325e-05	0.000925968	0.000584535	Pfn2/Add3/Synpo/Abi2/Wasf3/Synpo2/Sema5a/Ppm1e/Kirrel/Scin/Abl1/Ppm1f/Sorbs3	13
GO:0099536	BP	GO:0099536	synaptic signaling	34/512	936/28943	7.04651e-05	0.000936223	0.000591008	Edn3/Gnai1/Lama2/Pfn2/Dlg2/Cdh11/Gria4/Mme/Penk/Ppfia2/Ptn/Lin7a/Nrn1/Synpo/Ccr2/Dlgap4/Cd38/Slitrk3/Erc1/Tshz3/Abat/Nog/Cacng4/Tmod2/Clstn1/Abl1/Zdhhc2/Ccl2/Ntng2/Sorcs2/Slc6a2/Efnb3/Shank3/Slc6a6	34
GO:0014706	BP	GO:0014706	striated muscle tissue development	16/512	291/28943	7.05079e-05	0.000936223	0.000591008	Col14a1/Wnt5a/Rbpj/Tgfbr3/Col11a1/Heg1/Lef1/Igf1/Pdgfra/Ccnd2/Nog/Zmpste24/Mef2a/Eng/Rgs2/Tgfb2	16
GO:0003170	BP	GO:0003170	heart valve development	7/512	58/28943	7.17326e-05	0.000949145	0.000599165	Rbpj/Pde2a/Mdm4/Prdm1/Slit3/Tgfb2/Aplnr	7
GO:0072171	BP	GO:0072171	mesonephric tubule morphogenesis	8/512	78/28943	7.19467e-05	0.000949145	0.000599165	Pbx1/Gli3/Osr1/Gpc3/Nog/Ptch1/Myc/Wnt6	8
GO:0048705	BP	GO:0048705	skeletal system morphogenesis	15/512	261/28943	7.19473e-05	0.000949145	0.000599165	Has2/Arid5b/Gli3/Tiparp/Col11a1/Foxn3/Osr1/Zeb1/Pdgfra/Osr2/Nog/Sfrp4/Zmpste24/Myc/Tgfb2	15
GO:0042176	BP	GO:0042176	regulation of protein catabolic process	18/512	355/28943	7.23425e-05	0.000950307	0.000599899	Wnt5a/Egfr/Dab2/Tiparp/Ric1/Mdm4/Prickle1/Xpo1/Aqp11/Msn/Gpc3/Ankib1/Rnft2/Rdx/Zdhhc2/Nkd2/Dab2ip/Mad2l2	18
GO:0014910	BP	GO:0014910	regulation of smooth muscle cell migration	9/512	100/28943	7.23466e-05	0.000950307	0.000599899	Has2/Pdgfd/Cyp1b1/Pcsk5/Atp7a/Igf1/Adamts1/Myc/Ace	9
GO:0006612	BP	GO:0006612	protein targeting to membrane	10/512	124/28943	7.41635e-05	0.000972083	0.000613646	Pard3/Ank3/Macf1/Tcaf1/Aqp11/Tcaf2/Tram2/C2cd5/Zdhhc2/Ccl2	10
GO:0000226	BP	GO:0000226	microtubule cytoskeleton organization	26/512	634/28943	7.50728e-05	0.000978219	0.000617519	Gnai1/Racgap1/Map2/Pard3/Mid1/Cdc14a/Map7d2/Dclk2/Xpo1/Spire1/Stard9/Lrrc49/Ccdc170/Tnks/Npm1/Zbed3/Dzip1/Meig1/Abl1/Cdh5/Slk/Mark2/Eml1/Tacc1/Tpx2/Spast	26
GO:0045927	BP	GO:0045927	positive regulation of growth	17/512	324/28943	7.52723e-05	0.000978219	0.000617519	Rbpj/Hopx/Egfr/Tgfbr3/Cd38/Macf1/Cpne5/Sema5a/Igf1/Ccnd2/Cxcl12/Extl3/Sfrp2/Tgfb2/Fn1/Ppm1f/Rnf157	17
GO:0048608	BP	GO:0048608	reproductive structure development	17/512	324/28943	7.52723e-05	0.000978219	0.000617519	Wnt5a/Arid5b/Fst/Tiparp/Ube3a/Osr1/Arrb1/Tex15/Igf1/Pdgfra/Pcyt1b/Nog/Fzd4/Adamts1/Sfrp2/Ptx3/Tgfb2	17
GO:0055074	BP	GO:0055074	calcium ion homeostasis	17/512	324/28943	7.52723e-05	0.000978219	0.000617519	Edn3/Wnt5a/Ccr2/Xcl1/Asph/Atp2b4/Ptprc/Calca/Clstn1/Abl1/Cdh5/Pth1r/Tgfb2/Ccl2/Ccr5/Atp1b1/Aplnr	17
GO:0003002	BP	GO:0003002	regionalization	19/512	389/28943	7.55151e-05	0.000979291	0.000618196	Wnt5a/Cobl/Cyp26a1/Rbpj/Pbx1/Gli3/Zeb2/Osr1/Tshz1/Lef1/Pcsk5/Scmh1/Gpc3/Nog/Ptch1/Sfrp2/Sufu/Poglut1/Gpr161	19
GO:0014070	BP	GO:0014070	response to organic cyclic compound	31/512	823/28943	7.64831e-05	0.000989743	0.000624794	Gnai1/Gramd1b/Egfr/Dab2/Tiparp/Cd36/Clock/Ube3a/Cyp1b1/Pde2a/Acaca/Ddx17/Asph/Tbl1x/Rbfox2/Igf1/Abat/Atp2b4/Msn/Areg/Cacng4/Npm1/Zmiz1/Ptch1/Snai2/Tgfb2/Ccl2/Adcy3/Ccr5/Per1/Cd83	31
GO:0032872	BP	GO:0032872	regulation of stress-activated MAPK cascade	13/512	204/28943	7.67477e-05	0.000991068	0.00062563	Wnt5a/Egfr/Dab2/Hgf/Mid1/Eda2r/Ccr2/Mfhas1/Sfrp4/Sfrp2/Dab2ip/Tgfb2/Per1	13
GO:0003230	BP	GO:0003230	cardiac atrium development	6/512	41/28943	7.9122e-05	0.00101529	0.00064092	Wnt5a/Mdm4/Heg1/Nog/Eng/Tgfb2	6
GO:0030513	BP	GO:0030513	positive regulation of BMP signaling pathway	6/512	41/28943	7.9122e-05	0.00101529	0.00064092	Rbpj/Tgfbr3/Gpc3/Cdh5/Eng/Zfp423	6
GO:0051968	BP	GO:0051968	positive regulation of synaptic transmission, glutamatergic	6/512	41/28943	7.9122e-05	0.00101529	0.00064092	Gria4/Ccr2/Tshz3/Cacng4/Ccl2/Shank3	6
GO:0002685	BP	GO:0002685	regulation of leukocyte migration	14/512	234/28943	8.11704e-05	0.00103939	0.000656134	Edn3/Wnt5a/Selp/Pdgfd/Ptn/Ccr2/Jam2/Xcl1/Camk1d/Rtn4/Msn/Cxcl12/Chst2/Ccl2	14
GO:0032103	BP	GO:0032103	positive regulation of response to external stimulus	21/512	459/28943	8.16486e-05	0.00104279	0.00065828	Edn3/Wnt5a/Nkg7/Clock/Pdgfd/Ptn/Pde2a/Ccr2/Xcl1/Camk1d/Gprc5b/Sema5a/Cxcl12/Snai2/Masp1/Prkd2/Fn1/Ccl2/Ppm1f/Ace/Ccr5	21
GO:0050807	BP	GO:0050807	regulation of synapse organization	15/512	264/28943	8.17773e-05	0.00104279	0.00065828	Wnt5a/Ube3a/Gpc6/Ppfia2/Ptn/Lrrn1/Caprin2/Slitrk3/Abi2/Fzd1/Clstn1/Abl1/Dab2ip/Ntng2/Shank3	15
GO:0042474	BP	GO:0042474	middle ear morphogenesis	5/512	26/28943	8.21815e-05	0.00104576	0.000660156	Osr1/Tshz1/Osr2/Nog/Myc	5
GO:2000052	BP	GO:2000052	positive regulation of non-canonical Wnt signaling pathway	4/512	14/28943	8.41522e-05	0.00106861	0.000674581	Wnt5a/Dab2/Gpc3/Abl1	4
GO:0014033	BP	GO:0014033	neural crest cell differentiation	9/512	102/28943	8.44422e-05	0.00107007	0.000675501	Edn3/Cyp26a1/Zeb2/Kbtbd8/Hif1a/Sema5a/Ednrb/Snai2/Fn1	9
GO:0014812	BP	GO:0014812	muscle cell migration	10/512	126/28943	8.48594e-05	0.00107198	0.000676705	Has2/Pdgfd/Cyp1b1/Grb10/Pcsk5/Atp7a/Igf1/Adamts1/Myc/Ace	10
GO:0007163	BP	GO:0007163	establishment or maintenance of cell polarity	14/512	235/28943	8.49437e-05	0.00107198	0.000676705	Map2/Wnt5a/Dlg2/Fez1/Pard3/Lin7a/Prickle2/Macf1/Igf1/Msn/Cdh5/Mark2/Fbf1/Fscn1	14
GO:0010038	BP	GO:0010038	response to metal ion	16/512	296/28943	8.60669e-05	0.00108322	0.000683805	Ect2/Dlg2/Egfr/Ank3/Add1/Cp/Cpne5/Asph/Atp7a/Abat/Slc30a4/Kcnip3/Mef2a/Syt15/Fn1/Cpne1	16
GO:0051149	BP	GO:0051149	positive regulation of muscle cell differentiation	8/512	80/28943	8.62505e-05	0.00108322	0.000683805	Lama2/Lamc1/Hopx/Nid1/Atp11a/Tshz3/Igf1/Eng	8
GO:0040013	BP	GO:0040013	negative regulation of locomotion	18/512	360/28943	8.6367e-05	0.00108322	0.000683805	Pfn2/Stard13/Wnt5a/Tgfbr3/Cyp1b1/Dlc1/Ptprg/Ptn/Tcaf1/Sema5a/Atp2b4/Cxcl12/Nog/Sfrp2/Eng/Dab2ip/Ccl2/Ccr5	18
GO:0061458	BP	GO:0061458	reproductive system development	17/512	328/28943	8.74036e-05	0.00109398	0.000690594	Wnt5a/Arid5b/Fst/Tiparp/Ube3a/Osr1/Arrb1/Tex15/Igf1/Pdgfra/Pcyt1b/Nog/Fzd4/Adamts1/Sfrp2/Ptx3/Tgfb2	17
GO:0046660	BP	GO:0046660	female sex differentiation	11/512	152/28943	8.7851e-05	0.00109733	0.000692709	Wnt5a/Arid5b/Fst/Tiparp/Ube3a/Arrb1/Pdgfra/Pcyt1b/Fzd4/Adamts1/Ptx3	11
GO:0009894	BP	GO:0009894	regulation of catabolic process	34/512	947/28943	8.81984e-05	0.00109899	0.000693755	Zbtb20/Wnt5a/Egfr/Dab2/Tiparp/Ube3a/Ric1/Fez1/Mdm4/Vps13d/Vim/Prickle1/Hif1a/Xpo1/Aqp11/Igf1/Atp2b4/Msn/Gpc3/Prr5l/Npm1/Ankib1/Rnft2/Rdx/Zdhhc2/Nkd2/Zmpste24/Myc/Dab2ip/Ago2/Sufu/Samd4/Dram1/Mad2l2	34
GO:0098662	BP	GO:0098662	inorganic cation transmembrane transport	28/512	715/28943	8.83434e-05	0.00109899	0.000693755	Edn3/Kcnd2/Steap4/Cacna2d1/Kcnab1/Kcnab2/Ank3/Osr1/Xcl1/Alg10b/Asph/Scara5/Kcnd3/Atp7a/Ednrb/Atp2b4/Ptprc/Cacng4/Slc30a4/Kcnip3/Calca/Abl1/Tgfb2/Ccr5/Slc6a2/Atp1b1/Aplnr/Slc6a6	28
GO:0051056	BP	GO:0051056	regulation of small GTPase mediated signal transduction	14/512	236/28943	8.88687e-05	0.00110223	0.000695802	Stard13/Dlc1/Dennd1a/Ralgapa1/Heg1/Arrb1/Rtn4/Ralgps2/Cbl/Igf1/Abl1/Dab2ip/Tgfb2/Inf2	14
GO:0007626	BP	GO:0007626	locomotory behavior	15/512	266/28943	8.8965e-05	0.00110223	0.000695802	Kcnd2/Lsamp/Ube3a/Prex2/Penk/Gprc5b/Atp7a/Abat/Ccnd2/Cxcl12/Fzd4/Zmpste24/Efnb3/Usp2/Shank3	15
GO:0030042	BP	GO:0030042	actin filament depolymerization	7/512	60/28943	8.93792e-05	0.00110512	0.000697626	Add3/Add1/Shroom2/Sema5a/Rdx/Tmod2/Scin	7
GO:0034219	BP	GO:0034219	carbohydrate transmembrane transport	10/512	127/28943	9.06801e-05	0.00111668	0.000704926	Pid1/Grb10/Slc2a12/Igf1/Gpc3/Slc2a3/C2cd5/Mef2a/Myc/Ace	10
GO:0051101	BP	GO:0051101	regulation of DNA binding	10/512	127/28943	9.06801e-05	0.00111668	0.000704926	Runx1t1/Lef1/Igf1/Brd4/Tnks/Zmpste24/Myc/Cpne1/Mad2l2/Lif	10
GO:0001938	BP	GO:0001938	positive regulation of endothelial cell proliferation	9/512	103/28943	9.10996e-05	0.00111959	0.000706762	Wnt5a/Col18a1/Sema5a/Igf1/Cxcl12/Prkd2/Ccl2/Aplnr/Ppp1r16b	9
GO:1902905	BP	GO:1902905	positive regulation of supramolecular fiber organization	12/512	180/28943	9.37065e-05	0.00114932	0.000725527	Pfn2/Synpo/Abi2/Wasf3/Synpo2/Sema5a/Ppm1e/Kirrel/Scin/Abl1/Ppm1f/Sorbs3	12
GO:0001573	BP	GO:0001573	ganglioside metabolic process	5/512	27/28943	9.93992e-05	0.00121669	0.000768061	Itgb8/St8sia4/St3gal1/B4galt6/St6galnac4	5
GO:0021953	BP	GO:0021953	central nervous system neuron differentiation	13/512	210/28943	0.000102843	0.00125633	0.000793082	Map2/Cdh11/Gli3/Dclk1/Zeb2/Dclk2/Atp7a/Tsku/Zmiz1/Ptch1/B4galt6/Sufu/Shank3	13
GO:0033138	BP	GO:0033138	positive regulation of peptidyl-serine phosphorylation	10/512	129/28943	0.000103341	0.0012599	0.000795333	Pfn2/Wnt5a/Egfr/Caprin2/Arrb1/Atp2b4/Sfrp2/Prkd2/Mad2l2/Lif	10
GO:0048562	BP	GO:0048562	embryonic organ morphogenesis	17/512	333/28943	0.000104963	0.00127712	0.000806205	Wnt5a/Cthrc1/Rbpj/Gli3/Col11a1/Osr1/Tshz1/Hif1a/Zeb1/Pdgfra/Osr2/Nog/Eng/Myc/Sufu/Tgfb2/Aplnr	17
GO:1905005	BP	GO:1905005	regulation of epithelial to mesenchymal transition involved in endocardial cushion formation	3/512	6/28943	0.000105784	0.001282	0.000809287	Nog/Eng/Tgfb2	3
GO:2000298	BP	GO:2000298	regulation of Rho-dependent protein serine/threonine kinase activity	3/512	6/28943	0.000105784	0.001282	0.000809287	Dab2/Heg1/Synpo2	3
GO:0032101	BP	GO:0032101	regulation of response to external stimulus	35/512	997/28943	0.000107777	0.00130357	0.000822905	Edn3/Pros1/Wnt5a/Nkg7/Hopx/Cd36/Hgf/Clock/Pdgfd/Ptn/Pde2a/Ccr2/Xcl1/Camk1d/Gprc5b/Mfhas1/Sema5a/Igf1/Ednrb/Abat/Pdgfra/Cxcl12/Adar/Brd4/Snai2/Masp1/Zmpste24/Cdh5/Prkd2/Fn1/Ccl2/Ppm1f/Ace/Ccr5/Tfpi	35
GO:0048738	BP	GO:0048738	cardiac muscle tissue development	15/512	271/28943	0.000109397	0.00132055	0.000833622	Col14a1/Wnt5a/Rbpj/Tgfbr3/Col11a1/Heg1/Igf1/Pdgfra/Ccnd2/Nog/Zmpste24/Mef2a/Eng/Rgs2/Tgfb2	15
GO:0008406	BP	GO:0008406	gonad development	14/512	241/28943	0.000110951	0.00133403	0.000842134	Wnt5a/Arid5b/Fst/Tiparp/Ube3a/Osr1/Arrb1/Pdgfra/Pcyt1b/Fzd4/Adamts1/Sfrp2/Ptx3/Tgfb2	14
GO:0071241	BP	GO:0071241	cellular response to inorganic substance	14/512	241/28943	0.000110951	0.00133403	0.000842134	Ect2/Dlg2/Egfr/Ank3/Add1/Cpne5/Asph/Atp7a/Mef2a/Syt15/Fn1/Ddi2/Cpne1/Mtr	14
GO:0006825	BP	GO:0006825	copper ion transport	4/512	15/28943	0.000113151	0.00135515	0.000855462	Steap4/Cp/Atp7a/Heph	4
GO:2000095	BP	GO:2000095	regulation of Wnt signaling pathway, planar cell polarity pathway	4/512	15/28943	0.000113151	0.00135515	0.000855462	Dab2/Gpc3/Sfrp2/Abl1	4
GO:0072091	BP	GO:0072091	regulation of stem cell proliferation	9/512	106/28943	0.00011377	0.00135929	0.000858075	Wnt5a/Rbpj/Pbx1/Gli3/Osr2/Ptprc/Ptch1/Snai2/Ace	9
GO:0050803	BP	GO:0050803	regulation of synapse structure or activity	15/512	272/28943	0.000113942	0.00135929	0.000858075	Wnt5a/Ube3a/Gpc6/Ppfia2/Ptn/Lrrn1/Caprin2/Slitrk3/Abi2/Fzd1/Clstn1/Abl1/Dab2ip/Ntng2/Shank3	15
GO:0060047	BP	GO:0060047	heart contraction	14/512	242/28943	0.000115898	0.00137993	0.000871105	Edn3/Cacna2d1/Hopx/Mdm4/Kcnd3/Ednrb/Atp2b4/Calca/Zmpste24/Mef2a/Rgs2/Tgfb2/Ace/Atp1b1	14
GO:0033622	BP	GO:0033622	integrin activation	5/512	28/28943	0.000119257	0.00141716	0.000894609	Selp/Pcsk5/Cxcl12/Farp2/Fn1	5
GO:1904951	BP	GO:1904951	positive regulation of establishment of protein localization	17/512	337/28943	0.000121168	0.00143707	0.000907179	Ect2/Gli3/Ank3/Cd38/Tcaf1/Arrb1/Hif1a/Asph/Igf1/Abat/Ano1/Tcaf2/Prr5l/C2cd5/Zdhhc2/Tgfb2/Ccl2	17
GO:0001736	BP	GO:0001736	establishment of planar polarity	7/512	63/28943	0.000122338	0.00144814	0.000914164	Wnt5a/Cthrc1/Dab2/Fzd1/Gpc3/Sfrp2/Abl1	7
GO:0051258	BP	GO:0051258	protein polymerization	15/512	274/28943	0.000123526	0.00145937	0.000921255	Pfn2/Map2/Add3/Cobl/Add1/Spire1/Gas7/Kirrel/Rdx/Tmod2/Scin/Abl1/Cdh5/Tpx2/Kank4	15
GO:0048813	BP	GO:0048813	dendrite morphogenesis	12/512	186/28943	0.000127857	0.00150762	0.000951716	Ube3a/Prex2/Dclk1/Ppfia2/Ptn/Btbd3/Caprin2/Abi2/Atp7a/Rbfox2/Mef2a/Shank3	12
GO:0032386	BP	GO:0032386	regulation of intracellular transport	17/512	339/28943	0.000130063	0.00153068	0.000966272	Map2/Ect2/Dab2/Gli3/Cd36/Fez1/Ank3/Tcaf1/Xpo1/Asph/Msn/Tcaf2/Prr5l/Rdx/C2cd5/Zdhhc2/Ccl2	17
GO:0045137	BP	GO:0045137	development of primary sexual characteristics	14/512	245/28943	0.000131902	0.00154934	0.000978049	Wnt5a/Arid5b/Fst/Tiparp/Ube3a/Osr1/Arrb1/Pdgfra/Pcyt1b/Fzd4/Adamts1/Sfrp2/Ptx3/Tgfb2	14
GO:0001569	BP	GO:0001569	branching involved in blood vessel morphogenesis	6/512	45/28943	0.000135016	0.00158288	0.000999223	Lef1/Sema5a/Cxcl12/Sfrp2/Abl1/Eng	6
GO:0007164	BP	GO:0007164	establishment of tissue polarity	7/512	64/28943	0.000135292	0.00158307	0.000999342	Wnt5a/Cthrc1/Dab2/Fzd1/Gpc3/Sfrp2/Abl1	7
GO:0046649	BP	GO:0046649	lymphocyte activation	34/512	970/28943	0.000138898	0.00162216	0.00102402	Vav3/Nfil3/Rbpj/Pbx1/Nkg7/Gli3/Clec4a2/Prdm1/Ccr2/Cd38/Smarca2/Xcl1/Lef1/Satb1/Zeb1/Atp7a/St3gal1/Atp11c/Igf1/Itm2a/Apbb1ip/Msn/Ptprc/Cxcl12/Lmo1/Zmiz1/Abl1/Myc/Ccl2/Mr1/Mad2l2/Efnb3/Cd83/Il15ra	34
GO:0030516	BP	GO:0030516	regulation of axon extension	9/512	109/28943	0.000140981	0.00164334	0.00103739	Map2/Wnt5a/Macf1/Rtn4/Sema5a/Cxcl12/Abl1/Fn1/Ccr5	9
GO:0010212	BP	GO:0010212	response to ionizing radiation	10/512	134/28943	0.000141697	0.00164601	0.00103907	Ect2/Clock/Ccnd2/Ptprc/Hus1/Wrn/Sfrp2/Snai2/Zmpste24/Myc	10
GO:0098660	BP	GO:0098660	inorganic ion transmembrane transport	29/512	774/28943	0.000141817	0.00164601	0.00103907	Edn3/Kcnd2/Steap4/Cacna2d1/Kcnab1/Kcnab2/Ank3/Osr1/Xcl1/Alg10b/Asph/Scara5/Kcnd3/Atp7a/Ednrb/Ano1/Atp2b4/Ptprc/Cacng4/Slc30a4/Kcnip3/Calca/Abl1/Tgfb2/Ccr5/Slc6a2/Atp1b1/Aplnr/Slc6a6	29
GO:0061484	BP	GO:0061484	hematopoietic stem cell homeostasis	5/512	29/28943	0.000142018	0.00164601	0.00103907	Smarca2/Adar/Crispld1/Fstl1/Ubap2l	5
GO:0098742	BP	GO:0098742	cell-cell adhesion via plasma-membrane adhesion molecules	13/512	217/28943	0.000142672	0.00165045	0.00104188	Tenm3/Cdh11/Ccdc141/Selp/Gpc6/Palld/Cdh10/Arvcf/Slitrk3/Clstn1/Cdh5/Tgfb2/Ntng2	13
GO:0072078	BP	GO:0072078	nephron tubule morphogenesis	8/512	86/28943	0.000143955	0.00166215	0.00104927	Pbx1/Gli3/Osr1/Gpc3/Nog/Ptch1/Myc/Wnt6	8
GO:0045667	BP	GO:0045667	regulation of osteoblast differentiation	11/512	161/28943	0.000146602	0.00168952	0.00106654	Rorb/Cthrc1/Suco/Gli3/Igf1/Areg/Nog/Ptch1/Sfrp2/Snai2/Smoc1	11
GO:0060831	BP	GO:0060831	smoothened signaling pathway involved in dorsal/ventral neural tube patterning	4/512	16/28943	0.000148762	0.00170778	0.00107807	Gli3/Ptch1/Sufu/Gpr161	4
GO:0090177	BP	GO:0090177	establishment of planar polarity involved in neural tube closure	4/512	16/28943	0.000148762	0.00170778	0.00107807	Wnt5a/Cthrc1/Fzd1/Sfrp2	4
GO:0035265	BP	GO:0035265	organ growth	13/512	218/28943	0.000149325	0.00170778	0.00107807	Col14a1/Rbpj/Ube3a/Tgfbr3/Bnc2/Heg1/Igf1/Pdgfra/Ccnd2/Nog/Zmpste24/Rgs2/Tgfb2	13
GO:2000401	BP	GO:2000401	regulation of lymphocyte migration	7/512	65/28943	0.000149336	0.00170778	0.00107807	Wnt5a/Ccr2/Jam2/Xcl1/Msn/Cxcl12/Ccl2	7
GO:0043270	BP	GO:0043270	positive regulation of ion transport	17/512	343/28943	0.000149584	0.00170778	0.00107807	Edn3/Cacna2d1/Ank3/Ccr2/Tcaf1/Rtn4/Asph/Atp7a/Abat/Cxcl12/Cacng4/Abl1/Ccl2/Abcb1b/Atp1b1/Aplnr/Shank3	17
GO:0010595	BP	GO:0010595	positive regulation of endothelial cell migration	9/512	110/28943	0.000151177	0.00172274	0.00108751	Wnt5a/Col18a1/Hif1a/Ccbe1/Sema5a/Igf1/Abl1/Snai2/Prkd2	9
GO:0002691	BP	GO:0002691	regulation of cellular extravasation	6/512	46/28943	0.000152969	0.00173669	0.00109632	Selp/Pdgfd/Ccr2/Cxcl12/Chst2/Ccl2	6
GO:2000273	BP	GO:2000273	positive regulation of signaling receptor activity	6/512	46/28943	0.000152969	0.00173669	0.00109632	Ccr2/Hif1a/Areg/Cacng4/Ccl2/Shank3	6
GO:0030336	BP	GO:0030336	negative regulation of cell migration	16/512	312/28943	0.000157882	0.00178913	0.00112942	Pfn2/Stard13/Tgfbr3/Cyp1b1/Dlc1/Ptprg/Ptn/Tcaf1/Atp2b4/Cxcl12/Nog/Sfrp2/Eng/Dab2ip/Ccl2/Ccr5	16
GO:0110020	BP	GO:0110020	regulation of actomyosin structure organization	9/512	111/28943	0.000161982	0.0018296	0.00115497	Pfn2/Ect2/Dlc1/Synpo/Ppm1e/Abl1/Ppm1f/Sorbs3/Kank4	9
GO:1903131	BP	GO:1903131	mononuclear cell differentiation	22/512	518/28943	0.000162052	0.0018296	0.00115497	Nfil3/Rbpj/Pbx1/Gli3/Itgb8/Prdm1/Ccr2/Smarca2/Lef1/Satb1/Zeb1/Atp7a/St3gal1/Atp11c/Itm2a/Ptprc/Zmiz1/Abl1/Myc/Mr1/Cd83/Il15ra	22
GO:0042110	BP	GO:0042110	T cell activation	24/512	591/28943	0.00016284	0.00183439	0.00115799	Nkg7/Gli3/Clec4a2/Prdm1/Ccr2/Smarca2/Xcl1/Lef1/Satb1/Zeb1/Atp7a/Igf1/Apbb1ip/Msn/Ptprc/Cxcl12/Lmo1/Zmiz1/Abl1/Myc/Ccl2/Mr1/Efnb3/Cd83	24
GO:0001935	BP	GO:0001935	endothelial cell proliferation	12/512	191/28943	0.000163977	0.00183439	0.00115799	Bmper/Wnt5a/Col18a1/Sema5a/Igf1/Cxcl12/Calca/Eng/Prkd2/Ccl2/Aplnr/Ppp1r16b	12
GO:0006475	BP	GO:0006475	internal protein amino acid acetylation	12/512	191/28943	0.000163977	0.00183439	0.00115799	Smc5/Rps6ka5/Arrb1/Lef1/Kat6a/Brd4/Zfp451/Snai2/Kat6b/Zmpste24/Per1/Lif	12
GO:0018393	BP	GO:0018393	internal peptidyl-lysine acetylation	12/512	191/28943	0.000163977	0.00183439	0.00115799	Smc5/Rps6ka5/Arrb1/Lef1/Kat6a/Brd4/Zfp451/Snai2/Kat6b/Zmpste24/Per1/Lif	12
GO:0050731	BP	GO:0050731	positive regulation of peptidyl-tyrosine phosphorylation	12/512	191/28943	0.000163977	0.00183439	0.00115799	Cd36/Hgf/Nedd9/Abi2/Gprc5b/Igf1/Pdgfra/Ptprc/Areg/Abl1/Ace/Lif	12
GO:0060688	BP	GO:0060688	regulation of morphogenesis of a branching structure	7/512	66/28943	0.000164538	0.00183729	0.00115982	Wnt5a/Hgf/Rtn4/Pdgfra/Nog/Abl1/Snai2	7
GO:0090314	BP	GO:0090314	positive regulation of protein targeting to membrane	5/512	30/28943	0.000167958	0.00186864	0.00117962	Ank3/Tcaf1/Tcaf2/C2cd5/Ccl2	5
GO:0140058	BP	GO:0140058	neuron projection arborization	5/512	30/28943	0.000167958	0.00186864	0.00117962	Wnt5a/Ptn/Macf1/Fzd4/Ntng2	5
GO:0048839	BP	GO:0048839	inner ear development	13/512	221/28943	0.00017091	0.00189804	0.00119817	Bmper/Wnt5a/Cthrc1/Rbpj/Gli3/Col11a1/Lin7a/Zeb1/Alg10b/Slc4a7/Igf1/Tsku/Tgfb2	13
GO:0071900	BP	GO:0071900	regulation of protein serine/threonine kinase activity	17/512	347/28943	0.000171622	0.00190248	0.00120098	Edn3/Wnt5a/Egfr/Dab2/Pdgfd/Zeb2/Heg1/Synpo2/Igf1/Ccnd2/Atp2b4/Ptprc/Fzd4/Sfrp2/Abl1/Rgs2/Dab2ip	17
GO:0030835	BP	GO:0030835	negative regulation of actin filament depolymerization	6/512	47/28943	0.000172759	0.00191162	0.00120674	Add3/Add1/Shroom2/Rdx/Tmod2/Scin	6
GO:0001658	BP	GO:0001658	branching involved in ureteric bud morphogenesis	7/512	67/28943	0.000180967	0.00199882	0.00126179	Pbx1/Gli3/Gpc3/Nog/Ptch1/Myc/Wnt6	7
GO:0044387	BP	GO:0044387	negative regulation of protein kinase activity by regulation of protein phosphorylation	3/512	7/28943	0.000182686	0.00201009	0.00126891	Adar/Npm1/Ppm1f	3
GO:0001738	BP	GO:0001738	morphogenesis of a polarized epithelium	8/512	89/28943	0.000182975	0.00201009	0.00126891	Wnt5a/Cthrc1/Dab2/Fzd1/Msn/Gpc3/Sfrp2/Abl1	8
GO:0010827	BP	GO:0010827	regulation of glucose transmembrane transport	8/512	89/28943	0.000182975	0.00201009	0.00126891	Pid1/Grb10/Igf1/Gpc3/C2cd5/Mef2a/Myc/Ace	8
GO:0043473	BP	GO:0043473	pigmentation	9/512	113/28943	0.000185528	0.00203083	0.001282	Edn3/Gli3/Zeb2/Shroom2/Atp7a/Ednrb/Snai2/Myc/Hps3	9
GO:0055017	BP	GO:0055017	cardiac muscle tissue growth	9/512	113/28943	0.000185528	0.00203083	0.001282	Col14a1/Rbpj/Tgfbr3/Heg1/Igf1/Ccnd2/Nog/Rgs2/Tgfb2	9
GO:0001817	BP	GO:0001817	regulation of cytokine production	29/512	787/28943	0.000187594	0.00204978	0.00129396	Zbtb20/Wnt5a/Cd36/Hgf/Clec4a2/Itgb8/Cyp1b1/Heg1/Ccr2/Xcl1/Arrb1/Rtn4/Hif1a/Lef1/Gprc5b/Ccbe1/Igf1/Ptprc/Tsku/Calca/Abl1/Snai2/Prkd2/Tgfb2/Fn1/Ccl2/Ccr5/Per1/Cd83	29
GO:0007548	BP	GO:0007548	sex differentiation	16/512	317/28943	0.000189088	0.00205919	0.00129991	Wnt5a/Pbx1/Arid5b/Fst/Tiparp/Ube3a/Osr1/Arrb1/Tex15/Pdgfra/Pcyt1b/Fzd4/Adamts1/Sfrp2/Ptx3/Tgfb2	16
GO:0050804	BP	GO:0050804	modulation of chemical synaptic transmission	26/512	672/28943	0.00018913	0.00205919	0.00129991	Edn3/Gnai1/Lama2/Pfn2/Cdh11/Gria4/Mme/Ppfia2/Ptn/Nrn1/Synpo/Ccr2/Dlgap4/Cd38/Erc1/Tshz3/Nog/Cacng4/Clstn1/Abl1/Zdhhc2/Ccl2/Ntng2/Sorcs2/Shank3/Slc6a6	26
GO:0031644	BP	GO:0031644	regulation of nervous system process	12/512	194/28943	0.000189582	0.00206023	0.00130056	Hgf/Pard3/Dlgap4/Jam2/Rtn4/Wasf3/Igf1/Ednrb/Abat/Cacng4/Tmem100/Shank3	12
GO:0001574	BP	GO:0001574	ganglioside biosynthetic process	4/512	17/28943	0.000191822	0.00206023	0.00130056	St8sia4/St3gal1/B4galt6/St6galnac4	4
GO:0001886	BP	GO:0001886	endothelial cell morphogenesis	4/512	17/28943	0.000191822	0.00206023	0.00130056	Col18a1/Col22a1/Heg1/Col15a1	4
GO:0003222	BP	GO:0003222	ventricular trabecula myocardium morphogenesis	4/512	17/28943	0.000191822	0.00206023	0.00130056	Rbpj/Heg1/Eng/Tgfb2	4
GO:2000047	BP	GO:2000047	regulation of cell-cell adhesion mediated by cadherin	4/512	17/28943	0.000191822	0.00206023	0.00130056	Wnt5a/Adam19/Ppm1f/Mad2l2	4
GO:0071345	BP	GO:0071345	cellular response to cytokine stimulus	34/512	987/28943	0.000191842	0.00206023	0.00130056	Jak1/Wnt5a/Nfil3/Tle4/Arid5b/Mme/Selp/Pid1/Eda2r/Pde2a/Rps6ka5/Ccr2/Vim/Xcl1/Slit3/Hif1a/Lef1/Ptprc/Cxcl12/Adar/Mrc1/Spock2/Fzd4/Il13ra2/Kat6b/Gbp3/Myc/Dab2ip/Fn1/Ccl2/Gfpt2/Cpne1/Csf2rb2/Il15ra	34
GO:0003015	BP	GO:0003015	heart process	14/512	254/28943	0.000191924	0.00206023	0.00130056	Edn3/Cacna2d1/Hopx/Mdm4/Kcnd3/Ednrb/Atp2b4/Calca/Zmpste24/Mef2a/Rgs2/Tgfb2/Ace/Atp1b1	14
GO:0031098	BP	GO:0031098	stress-activated protein kinase signaling cascade	14/512	254/28943	0.000191924	0.00206023	0.00130056	Wnt5a/Egfr/Dab2/Hgf/Mid1/Eda2r/Ccr2/Mfhas1/Sfrp4/Sfrp2/Zmpste24/Dab2ip/Tgfb2/Per1	14
GO:0099177	BP	GO:0099177	regulation of trans-synaptic signaling	26/512	673/28943	0.000193552	0.00207406	0.00130929	Edn3/Gnai1/Lama2/Pfn2/Cdh11/Gria4/Mme/Ppfia2/Ptn/Nrn1/Synpo/Ccr2/Dlgap4/Cd38/Erc1/Tshz3/Nog/Cacng4/Clstn1/Abl1/Zdhhc2/Ccl2/Ntng2/Sorcs2/Shank3/Slc6a6	26
GO:0035137	BP	GO:0035137	hindlimb morphogenesis	6/512	48/28943	0.000194517	0.00208075	0.00131351	Aff3/Osr1/Atp7a/Osr2/Gpc3/Ptch1	6
GO:1905207	BP	GO:1905207	regulation of cardiocyte differentiation	5/512	31/28943	0.000197363	0.00210751	0.00133041	Egfr/Abi3bp/Prickle1/Ccnd2/Tgfb2	5
GO:0045995	BP	GO:0045995	regulation of embryonic development	8/512	90/28943	0.000197764	0.0021081	0.00133078	Lama2/Racgap1/Ino80d/Osr1/Osr2/Zbed3/Sfrp2/Poglut1	8
GO:0030837	BP	GO:0030837	negative regulation of actin filament polymerization	7/512	68/28943	0.000198697	0.00211068	0.00133241	Pfn2/Add3/Add1/Rdx/Tmod2/Scin/Kank4	7
GO:0032233	BP	GO:0032233	positive regulation of actin filament bundle assembly	7/512	68/28943	0.000198697	0.00211068	0.00133241	Pfn2/Synpo/Synpo2/Ppm1e/Abl1/Ppm1f/Sorbs3	7
GO:0030278	BP	GO:0030278	regulation of ossification	10/512	140/28943	0.000202944	0.00215205	0.00135852	Wnt5a/Rbpj/Pbx1/Ptn/Osr1/Hif1a/Pkdcc/Osr2/Calca/Zmpste24	10
GO:0050766	BP	GO:0050766	positive regulation of phagocytosis	8/512	91/28943	0.00021352	0.00226028	0.00142684	Pros1/Cd36/Camk1d/Ptprc/Ptx3/Masp1/Ccl2/Il15ra	8
GO:0021700	BP	GO:0021700	developmental maturation	17/512	355/28943	0.000224338	0.00237069	0.00149654	Wnt5a/Dlg2/Rbpj/Spink1/Ank3/Hif1a/Igf1/Ednrb/Calca/Clstn1/Zdhhc2/B4galt6/Cdh5/Farp2/Pth1r/Dab2ip/Tgfb2	17
GO:0001942	BP	GO:0001942	hair follicle development	9/512	116/28943	0.00022614	0.00237738	0.00150077	Wnt5a/Lamc1/Rbpj/Fst/Egfr/Apcdd1/Atp7a/Zmpste24/Tgfb2	9
GO:0030038	BP	GO:0030038	contractile actin filament bundle assembly	9/512	116/28943	0.00022614	0.00237738	0.00150077	Pfn2/Dlc1/Synpo/Arrb1/Ppm1e/Abl1/Ppm1f/Sorbs3/Kank4	9
GO:0043149	BP	GO:0043149	stress fiber assembly	9/512	116/28943	0.00022614	0.00237738	0.00150077	Pfn2/Dlc1/Synpo/Arrb1/Ppm1e/Abl1/Ppm1f/Sorbs3/Kank4	9
GO:0061333	BP	GO:0061333	renal tubule morphogenesis	8/512	92/28943	0.000230291	0.00241526	0.00152468	Pbx1/Gli3/Osr1/Gpc3/Nog/Ptch1/Myc/Wnt6	8
GO:0010574	BP	GO:0010574	regulation of vascular endothelial growth factor production	5/512	32/28943	0.000230533	0.00241526	0.00152468	Cyp1b1/Ccr2/Hif1a/Ccbe1/Ccl2	5
GO:0071677	BP	GO:0071677	positive regulation of mononuclear cell migration	7/512	70/28943	0.000238362	0.002493	0.00157376	Wnt5a/Pdgfd/Ccr2/Jam2/Xcl1/Cxcl12/Ccl2	7
GO:0044089	BP	GO:0044089	positive regulation of cellular component biogenesis	22/512	533/28943	0.000241156	0.00250994	0.00158445	Pfn2/Cobl/Hopx/Cd36/Lrrn1/Synpo/Slitrk3/Abi2/Pcsk5/Synpo2/Atp7a/Msn/Ppm1e/Kirrel/Dzip1/Clstn1/Abl1/Cdh5/Dab2ip/Ppm1f/Sorbs3/Fscn1	22
GO:0006939	BP	GO:0006939	smooth muscle contraction	9/512	117/28943	0.000241214	0.00250994	0.00158445	Edn3/Cd38/Tshz3/Ednrb/Abat/Atp2b4/Apbb2/Calca/Rgs2	9
GO:0034766	BP	GO:0034766	negative regulation of ion transmembrane transport	9/512	117/28943	0.000241214	0.00250994	0.00158445	Kcnab1/Ank3/Slc43a2/Osr1/Atp7a/Tcaf2/Calca/Rgs2/Tgfb2	9
GO:0042249	BP	GO:0042249	establishment of planar polarity of embryonic epithelium	4/512	18/28943	0.000243191	0.00252621	0.00159472	Wnt5a/Cthrc1/Fzd1/Sfrp2	4
GO:0034332	BP	GO:0034332	adherens junction organization	6/512	50/28943	0.000244488	0.00253537	0.0016005	Cdh11/Add1/Cdh10/Abi2/Rdx/Cdh5	6
GO:2000146	BP	GO:2000146	negative regulation of cell motility	16/512	325/28943	0.000250188	0.00259008	0.00163504	Pfn2/Stard13/Tgfbr3/Cyp1b1/Dlc1/Ptprg/Ptn/Tcaf1/Atp2b4/Cxcl12/Nog/Sfrp2/Eng/Dab2ip/Ccl2/Ccr5	16
GO:0035282	BP	GO:0035282	segmentation	9/512	118/28943	0.000257113	0.00265727	0.00167745	Wnt5a/Cobl/Rbpj/Zeb2/Osr1/Lef1/Nog/Sfrp2/Poglut1	9
GO:1903792	BP	GO:1903792	negative regulation of anion transport	5/512	33/28943	0.000267777	0.00276281	0.00174408	Slc43a2/Abat/Tcaf2/Sfrp4/Rgs2	5
GO:0090316	BP	GO:0090316	positive regulation of intracellular protein transport	10/512	145/28943	0.000269691	0.00277787	0.00175358	Ect2/Gli3/Ank3/Tcaf1/Asph/Tcaf2/Prr5l/C2cd5/Zdhhc2/Ccl2	10
GO:0046578	BP	GO:0046578	regulation of Ras protein signal transduction	12/512	203/28943	0.000287814	0.00293648	0.00185371	Stard13/Dlc1/Dennd1a/Heg1/Arrb1/Rtn4/Ralgps2/Cbl/Igf1/Abl1/Dab2ip/Tgfb2	12
GO:0019800	BP	GO:0019800	peptide cross-linking via chondroitin 4-sulfate glycosaminoglycan	3/512	8/28943	0.000288456	0.00293648	0.00185371	Mamdc2/Egflam/Spock2	3
GO:0097017	BP	GO:0097017	renal protein absorption	3/512	8/28943	0.000288456	0.00293648	0.00185371	Dab2/Ednrb/Kirrel	3
GO:1901552	BP	GO:1901552	positive regulation of endothelial cell development	3/512	8/28943	0.000288456	0.00293648	0.00185371	Akap11/Add1/Cdh5	3
GO:1903142	BP	GO:1903142	positive regulation of establishment of endothelial barrier	3/512	8/28943	0.000288456	0.00293648	0.00185371	Akap11/Add1/Cdh5	3
GO:2000096	BP	GO:2000096	positive regulation of Wnt signaling pathway, planar cell polarity pathway	3/512	8/28943	0.000288456	0.00293648	0.00185371	Dab2/Gpc3/Abl1	3
GO:2000643	BP	GO:2000643	positive regulation of early endosome to late endosome transport	3/512	8/28943	0.000288456	0.00293648	0.00185371	Dab2/Msn/Rdx	3
GO:0002062	BP	GO:0002062	chondrocyte differentiation	9/512	120/28943	0.000291522	0.00295783	0.00186719	Gli3/Col11a1/Osr1/Hif1a/Pkdcc/Osr2/Sfrp2/Snai2/Pth1r	9
GO:0098773	BP	GO:0098773	skin epidermis development	9/512	120/28943	0.000291522	0.00295783	0.00186719	Wnt5a/Lamc1/Rbpj/Fst/Egfr/Apcdd1/Atp7a/Zmpste24/Tgfb2	9
GO:0006473	BP	GO:0006473	protein acetylation	13/512	234/28943	0.00029826	0.00302118	0.00190718	Clock/Smc5/Rps6ka5/Arrb1/Lef1/Kat6a/Brd4/Zfp451/Snai2/Kat6b/Zmpste24/Per1/Lif	13
GO:0018394	BP	GO:0018394	peptidyl-lysine acetylation	12/512	204/28943	0.000301005	0.00304394	0.00192155	Smc5/Rps6ka5/Arrb1/Lef1/Kat6a/Brd4/Zfp451/Snai2/Kat6b/Zmpste24/Per1/Lif	12
GO:0035641	BP	GO:0035641	locomotory exploration behavior	4/512	19/28943	0.000303751	0.00306663	0.00193587	Lsamp/Ube3a/Penk/Shank3	4
GO:0016339	BP	GO:0016339	calcium-dependent cell-cell adhesion via plasma membrane cell adhesion molecules	5/512	34/28943	0.000309415	0.00308196	0.00194555	Cdh11/Selp/Cdh10/Arvcf/Cdh5	5
GO:0099563	BP	GO:0099563	modification of synaptic structure	5/512	34/28943	0.000309415	0.00308196	0.00194555	Pfn2/Filip1/Synpo/Wasf3/Abl1	5
GO:1903959	BP	GO:1903959	regulation of anion transmembrane transport	5/512	34/28943	0.000309415	0.00308196	0.00194555	Slc43a2/Tcaf1/Tcaf2/Rgs2/Abcb1b	5
GO:1905330	BP	GO:1905330	regulation of morphogenesis of an epithelium	7/512	73/28943	0.00030958	0.00308196	0.00194555	Wnt5a/Hgf/Pdgfra/Nog/Abl1/Snai2/Lif	7
GO:0044106	BP	GO:0044106	cellular amine metabolic process	9/512	121/28943	0.000310104	0.00308196	0.00194555	Atp7a/Abat/Atp2b4/Maoa/Sult1d1/Maob/Tgfb2/Tdo2/Amd1	9
GO:0090100	BP	GO:0090100	positive regulation of transmembrane receptor protein serine/threonine kinase signaling pathway	9/512	121/28943	0.000310104	0.00308196	0.00194555	Rbpj/Dab2/Tgfbr3/Zeb2/Gpc3/Cdh5/Eng/Zfp423/Tgfb2	9
GO:0043932	BP	GO:0043932	ossification involved in bone remodeling	2/512	2/28943	0.000312334	0.00308196	0.00194555	Cthrc1/Ptn	2
GO:0062044	BP	GO:0062044	negative regulation of cardiac epithelial to mesenchymal transition	2/512	2/28943	0.000312334	0.00308196	0.00194555	Nog/Tgfb2	2
GO:0072185	BP	GO:0072185	metanephric cap development	2/512	2/28943	0.000312334	0.00308196	0.00194555	Osr1/Myc	2
GO:0072186	BP	GO:0072186	metanephric cap morphogenesis	2/512	2/28943	0.000312334	0.00308196	0.00194555	Osr1/Myc	2
GO:0090094	BP	GO:0090094	metanephric cap mesenchymal cell proliferation involved in metanephros development	2/512	2/28943	0.000312334	0.00308196	0.00194555	Osr1/Myc	2
GO:1905006	BP	GO:1905006	negative regulation of epithelial to mesenchymal transition involved in endocardial cushion formation	2/512	2/28943	0.000312334	0.00308196	0.00194555	Nog/Tgfb2	2
GO:2000471	BP	GO:2000471	regulation of hematopoietic stem cell migration	2/512	2/28943	0.000312334	0.00308196	0.00194555	Ccr2/Ptprc	2
GO:2000473	BP	GO:2000473	positive regulation of hematopoietic stem cell migration	2/512	2/28943	0.000312334	0.00308196	0.00194555	Ccr2/Ptprc	2
GO:0030098	BP	GO:0030098	lymphocyte differentiation	20/512	471/28943	0.000318148	0.00313427	0.00197857	Nfil3/Rbpj/Pbx1/Gli3/Prdm1/Ccr2/Smarca2/Lef1/Satb1/Zeb1/Atp7a/St3gal1/Atp11c/Itm2a/Ptprc/Zmiz1/Abl1/Mr1/Cd83/Il15ra	20
GO:0051346	BP	GO:0051346	negative regulation of hydrolase activity	17/512	366/28943	0.000319541	0.00314293	0.00198403	Hgf/Tfpi2/Spink1/Pi15/Arrb1/Igf1/Gpc3/Rdx/Sfrp2/Ptx3/Wfdc3/Abl1/Rgs2/Dab2ip/Tgfb2/Tfpi/Simc1	17
GO:0044770	BP	GO:0044770	cell cycle phase transition	22/512	545/28943	0.00032716	0.00321269	0.00202807	Pbx1/Egfr/Clock/Ppp2r5c/Smc5/Cdc14a/Foxn3/Smarca2/Ccnd2/Fbxl3/Atp2b4/Ptprc/Apbb2/Brd4/Npm1/Adamts1/Hus1/Rdx/Myc/Ccl2/Abcb1b/Spast	22
GO:0060675	BP	GO:0060675	ureteric bud morphogenesis	7/512	74/28943	0.000336785	0.0033019	0.00208438	Pbx1/Gli3/Gpc3/Nog/Ptch1/Myc/Wnt6	7
GO:0051146	BP	GO:0051146	striated muscle cell differentiation	16/512	334/28943	0.00033872	0.00331555	0.002093	Col14a1/Rbpj/Hopx/Atp11a/Adamts15/Igf1/Pdgfra/Ccnd2/Myof/Cxcl12/Tmod2/Zmpste24/Mef2a/Myc/Rgs2/Spag9	16
GO:0030902	BP	GO:0030902	hindbrain development	11/512	178/28943	0.000350174	0.00341709	0.0021571	Dlc1/Zbtb18/Lef1/Slc4a7/Atp7a/Rbfox2/Igf1/Nog/Fzd4/Abl1/Zfp423	11
GO:0060419	BP	GO:0060419	heart growth	9/512	123/28943	0.000350212	0.00341709	0.0021571	Col14a1/Rbpj/Tgfbr3/Heg1/Igf1/Ccnd2/Nog/Rgs2/Tgfb2	9
GO:0032984	BP	GO:0032984	protein-containing complex disassembly	13/512	238/28943	0.000350937	0.0034187	0.00215812	Map2/Add3/Mid1/Add1/Asph/Shroom2/Sema5a/Rdx/Tmod2/Scin/Zmpste24/Myc/Tpx2	13
GO:0003209	BP	GO:0003209	cardiac atrium morphogenesis	5/512	35/28943	0.000355777	0.00346033	0.0021844	Wnt5a/Heg1/Nog/Eng/Tgfb2	5
GO:0051091	BP	GO:0051091	positive regulation of DNA-binding transcription factor activity	14/512	271/28943	0.000371029	0.00360294	0.00227442	Wnt5a/Arid5b/Cd36/Clock/Tgfbr3/Eda2r/Ndp/Rps6ka5/Erc1/Camk1d/Fzd1/Npm1/Fzd4/Prkd2	14
GO:0061387	BP	GO:0061387	regulation of extent of cell growth	9/512	124/28943	0.000371816	0.00360485	0.00227563	Map2/Wnt5a/Macf1/Rtn4/Sema5a/Cxcl12/Abl1/Fn1/Ccr5	9
GO:0007517	BP	GO:0007517	muscle organ development	17/512	371/28943	0.000373286	0.00361337	0.002281	Wnt5a/Rbpj/Arid5b/Tgfbr3/Col11a1/Zbtb18/Heg1/Lef1/Ddx17/Fzd1/Nog/Tcf23/Eng/Myc/Tgfb2/Usp2/Lif	17
GO:0002690	BP	GO:0002690	positive regulation of leukocyte chemotaxis	8/512	99/28943	0.000380431	0.00367089	0.00231732	Edn3/Wnt5a/Ptn/Ccr2/Xcl1/Camk1d/Cxcl12/Ccl2	8
GO:0051492	BP	GO:0051492	regulation of stress fiber assembly	8/512	99/28943	0.000380431	0.00367089	0.00231732	Pfn2/Dlc1/Synpo/Ppm1e/Abl1/Ppm1f/Sorbs3/Kank4	8
GO:1903039	BP	GO:1903039	positive regulation of leukocyte cell-cell adhesion	14/512	272/28943	0.00038498	0.00370892	0.00234133	Has2/Gli3/Selp/Ccr2/Smarca2/Xcl1/Lef1/Igf1/Ptprc/Chst2/Zmiz1/Ccl2/Efnb3/Cd83	14
GO:0002040	BP	GO:0002040	sprouting angiogenesis	9/512	125/28943	0.000394507	0.00379472	0.00239549	Jak1/Bmper/Stard13/Rtn4/Lef1/Sema5a/Abl1/Aplnr/Ppp1r16b	9
GO:0016573	BP	GO:0016573	histone acetylation	11/512	181/28943	0.000403616	0.00387624	0.00244695	Rps6ka5/Arrb1/Lef1/Kat6a/Brd4/Zfp451/Snai2/Kat6b/Zmpste24/Per1/Lif	11
GO:0048511	BP	GO:0048511	rhythmic process	15/512	306/28943	0.000404502	0.00387865	0.00244847	Rorb/Kcnd2/Nfil3/Clock/Ube3a/Ptn/Arrb1/Igf1/Pdgfra/Fbxl3/Fzd4/Adamts1/Ptx3/Per1/Usp2	15
GO:0001779	BP	GO:0001779	natural killer cell differentiation	5/512	36/28943	0.000407203	0.00389232	0.0024571	Nfil3/Pbx1/Prdm1/Ptprc/Il15ra	5
GO:0010573	BP	GO:0010573	vascular endothelial growth factor production	5/512	36/28943	0.000407203	0.00389232	0.0024571	Cyp1b1/Ccr2/Hif1a/Ccbe1/Ccl2	5
GO:0030307	BP	GO:0030307	positive regulation of cell growth	12/512	211/28943	0.00040851	0.00389871	0.00246114	Egfr/Cd38/Macf1/Cpne5/Sema5a/Igf1/Cxcl12/Extl3/Sfrp2/Tgfb2/Fn1/Rnf157	12
GO:0048546	BP	GO:0048546	digestive tract morphogenesis	6/512	55/28943	0.000414033	0.00394526	0.00249052	Wnt5a/Egfr/Gli3/Hif1a/Pdgfra/Sfrp2	6
GO:0030099	BP	GO:0030099	myeloid cell differentiation	19/512	445/28943	0.000416524	0.00396282	0.0025016	Rbpj/Dab2/Itgb8/Tgfbr3/Add1/Hif1a/Lef1/Kat6a/Mfhas1/Rbfox2/Gpc3/Adar/Heph/Calca/Scin/Myc/Farp2/Sh3pxd2a/Lif	19
GO:0062042	BP	GO:0062042	regulation of cardiac epithelial to mesenchymal transition	3/512	9/28943	0.000427001	0.00405617	0.00256054	Nog/Eng/Tgfb2	3
GO:0001756	BP	GO:0001756	somitogenesis	7/512	77/28943	0.000430073	0.00407902	0.00257496	Wnt5a/Cobl/Rbpj/Zeb2/Lef1/Sfrp2/Poglut1	7
GO:0007159	BP	GO:0007159	leukocyte cell-cell adhesion	18/512	411/28943	0.000435032	0.00411793	0.00259952	Has2/Gli3/Selp/Ccr2/Jam2/Smarca2/Xcl1/Lef1/Igf1/Msn/Ptprc/Cxcl12/Chst2/Zmiz1/Calca/Ccl2/Efnb3/Cd83	18
GO:0032092	BP	GO:0032092	positive regulation of protein binding	8/512	101/28943	0.000435524	0.00411793	0.00259952	Wnt5a/Cthrc1/Add1/Caprin2/Arrb1/Spon1/Abl1/Ace	8
GO:0009308	BP	GO:0009308	amine metabolic process	9/512	127/28943	0.000443316	0.00417866	0.00263786	Atp7a/Abat/Atp2b4/Maoa/Sult1d1/Maob/Tgfb2/Tdo2/Amd1	9
GO:0045807	BP	GO:0045807	positive regulation of endocytosis	9/512	127/28943	0.000443316	0.00417866	0.00263786	Wnt5a/Dab2/Cd36/Pard3/Add1/Arrb1/Cbl/Gpc3/Sfrp4	9
GO:0051403	BP	GO:0051403	stress-activated MAPK cascade	13/512	244/28943	0.000444704	0.00418497	0.00264184	Wnt5a/Egfr/Dab2/Hgf/Mid1/Eda2r/Ccr2/Mfhas1/Sfrp4/Sfrp2/Dab2ip/Tgfb2/Per1	13
GO:0043543	BP	GO:0043543	protein acylation	14/512	276/28943	0.000445355	0.00418497	0.00264184	Clock/Smc5/Rps6ka5/Arrb1/Lef1/Kat6a/Brd4/Zfp451/Snai2/Zdhhc2/Kat6b/Zmpste24/Per1/Lif	14
GO:0051223	BP	GO:0051223	regulation of protein transport	22/512	558/28943	0.000449648	0.00421882	0.00266321	Ect2/Gli3/Cd36/Clock/Ank3/Cd38/Tcaf1/Arrb1/Hif1a/Xpo1/Pkdcc/Asph/Igf1/Abat/Ano1/Tcaf2/Prr5l/C2cd5/Zdhhc2/Tgfb2/Ccl2/Ppm1f	22
GO:0030162	BP	GO:0030162	regulation of proteolysis	27/512	751/28943	0.000452917	0.00424297	0.00267845	Dab2/Hgf/Tfpi2/Ube3a/Dlc1/Spink1/Pi15/Prickle1/Arrb1/Xpo1/Asph/Ccbe1/Aqp11/Igf1/Gpc3/Ankib1/Rnft2/Spon1/Sfrp2/Wfdc3/Nkd2/Myc/Dab2ip/Sufu/Ppm1f/Tfpi/Simc1	27
GO:0046325	BP	GO:0046325	negative regulation of glucose import	4/512	21/28943	0.000456063	0.00425938	0.00268881	Pid1/Grb10/Myc/Ace	4
GO:1903236	BP	GO:1903236	regulation of leukocyte tethering or rolling	4/512	21/28943	0.000456063	0.00425938	0.00268881	Selp/Ccr2/Cxcl12/Chst2	4
GO:0010463	BP	GO:0010463	mesenchymal cell proliferation	6/512	56/28943	0.000456872	0.00426042	0.00268947	Wnt5a/Ptn/Osr1/Zeb1/Gpc3/Myc	6
GO:0031099	BP	GO:0031099	regeneration	10/512	155/28943	0.000458956	0.00427332	0.00269762	Hopx/Hgf/Ptn/Rtn4/Igf1/Cxcl12/Ace/Mtr/Matn2/Lif	10
GO:0050901	BP	GO:0050901	leukocyte tethering or rolling	5/512	37/28943	0.000464042	0.0043069	0.00271881	Selp/Ccr2/Jam2/Cxcl12/Chst2	5
GO:0090313	BP	GO:0090313	regulation of protein targeting to membrane	5/512	37/28943	0.000464042	0.0043069	0.00271881	Ank3/Tcaf1/Tcaf2/C2cd5/Ccl2	5
GO:0061097	BP	GO:0061097	regulation of protein tyrosine kinase activity	7/512	78/28943	0.000465382	0.0043069	0.00271881	Nedd9/Abi2/Cbl/Gprc5b/Ptprc/Areg/Ace	7
GO:0071277	BP	GO:0071277	cellular response to calcium ion	7/512	78/28943	0.000465382	0.0043069	0.00271881	Ect2/Add1/Cpne5/Asph/Mef2a/Syt15/Cpne1	7
GO:0007265	BP	GO:0007265	Ras protein signal transduction	16/512	344/28943	0.000467625	0.00432111	0.00272778	Racgap1/Stard13/Elmo1/Dlc1/Dennd1a/Heg1/Arrb1/Rtn4/Ralgps2/Abi2/Cbl/Igf1/Abl1/Farp2/Dab2ip/Tgfb2	16
GO:0008643	BP	GO:0008643	carbohydrate transport	10/512	156/28943	0.0004828	0.00445459	0.00281204	Pid1/Grb10/Slc2a12/Igf1/Gpc3/Slc2a3/C2cd5/Mef2a/Myc/Ace	10
GO:0030514	BP	GO:0030514	negative regulation of BMP signaling pathway	6/512	57/28943	0.000503087	0.00463478	0.00292579	Bmper/Wnt5a/Fzd1/Nog/Sfrp2/Abl1	6
GO:0048593	BP	GO:0048593	camera-type eye morphogenesis	10/512	157/28943	0.000507662	0.00466988	0.00294795	Rorb/Tenm3/Gli3/Ptn/Hif1a/Abi2/Zeb1/Slc4a7/Shroom2/Tsku	10
GO:0007162	BP	GO:0007162	negative regulation of cell adhesion	15/512	313/28943	0.000511836	0.00470119	0.00296772	Gli3/Cyp1b1/Dlc1/Jam2/Lef1/Sema5a/Abat/Ptprc/Cxcl12/Fzd4/Rdx/Abl1/Snai2/Ppm1f/Mad2l2	15
GO:0071634	BP	GO:0071634	regulation of transforming growth factor beta production	5/512	38/28943	0.000526654	0.00483003	0.00304905	Itgb8/Hif1a/Tsku/Tgfb2/Fn1	5
GO:0090288	BP	GO:0090288	negative regulation of cellular response to growth factor stimulus	8/512	104/28943	0.000530151	0.0048497	0.00306147	Bmper/Wnt5a/Fzd1/Atp2b4/Nog/Sfrp2/Abl1/Dab2ip	8
GO:0043409	BP	GO:0043409	negative regulation of MAPK cascade	11/512	187/28943	0.000531181	0.0048497	0.00306147	Dab2/Arrb1/Igf1/Ptprc/Sfrp4/Sfrp2/Abl1/Rgs2/Dab2ip/Per1/Lif	11
GO:0048592	BP	GO:0048592	eye morphogenesis	11/512	187/28943	0.000531181	0.0048497	0.00306147	Rorb/Tenm3/Gli3/Ptn/Prdm1/Hif1a/Abi2/Zeb1/Slc4a7/Shroom2/Tsku	11
GO:0043966	BP	GO:0043966	histone H3 acetylation	7/512	80/28943	0.000542922	0.00494213	0.00311981	Lef1/Kat6a/Brd4/Zfp451/Kat6b/Per1/Lif	7
GO:2000573	BP	GO:2000573	positive regulation of DNA biosynthetic process	7/512	80/28943	0.000542922	0.00494213	0.00311981	Hgf/Cyp1b1/Hmbox1/Tnks/Npm1/Myc/Prkd2	7
GO:1900006	BP	GO:1900006	positive regulation of dendrite development	4/512	22/28943	0.00054966	0.00499602	0.00315383	Cobl/Ptn/Abl1/Dab2ip	4
GO:0030282	BP	GO:0030282	bone mineralization	9/512	131/28943	0.000555871	0.00504496	0.00318473	Ptn/Osr1/Hif1a/Pkdcc/Igf1/Osr2/Gpc3/Zmpste24/Pth1r	9
GO:0050900	BP	GO:0050900	leukocyte migration	17/512	385/28943	0.000567295	0.00514101	0.00324536	Edn3/Vav3/Wnt5a/Selp/Pdgfd/Ptn/Ccr2/Jam2/Xcl1/Camk1d/Rtn4/Ednrb/Msn/Cxcl12/Chst2/Calca/Ccl2	17
GO:0045123	BP	GO:0045123	cellular extravasation	7/512	81/28943	0.000585365	0.0052969	0.00334377	Selp/Pdgfd/Ccr2/Jam2/Cxcl12/Chst2/Ccl2	7
GO:0045879	BP	GO:0045879	negative regulation of smoothened signaling pathway	5/512	39/28943	0.000595404	0.00537182	0.00339106	Gli3/Gpc3/Ptch1/Sufu/Gpr161	5
GO:0050654	BP	GO:0050654	chondroitin sulfate proteoglycan metabolic process	5/512	39/28943	0.000595404	0.00537182	0.00339106	Mamdc2/Egflam/Igf1/Spock2/Arsb	5
GO:0003149	BP	GO:0003149	membranous septum morphogenesis	3/512	10/28943	0.000601996	0.0053994	0.00340848	Fzd1/Nog/Tgfb2	3
GO:0043615	BP	GO:0043615	astrocyte cell migration	3/512	10/28943	0.000601996	0.0053994	0.00340848	Apcdd1/Ccr2/Ccl2	3
GO:1903596	BP	GO:1903596	regulation of gap junction assembly	3/512	10/28943	0.000601996	0.0053994	0.00340848	Hopx/Ace/Aplnr	3
GO:1904526	BP	GO:1904526	regulation of microtubule binding	3/512	10/28943	0.000601996	0.0053994	0.00340848	Map2/Abl1/Mark2	3
GO:0016485	BP	GO:0016485	protein processing	14/512	285/28943	0.000611305	0.00547485	0.0034561	Gli3/Mme/Adam19/Asph/Ccbe1/Pcsk5/Cpxm2/Spon1/Fam111a/Ptch1/Nkd2/Zmpste24/Myc/Ddi2	14
GO:0045619	BP	GO:0045619	regulation of lymphocyte differentiation	12/512	221/28943	0.000617072	0.00551841	0.0034836	Gli3/Prdm1/Ccr2/Smarca2/Lef1/Zeb1/Atp11c/Ptprc/Zmiz1/Abl1/Cd83/Il15ra	12
GO:1904064	BP	GO:1904064	positive regulation of cation transmembrane transport	11/512	191/28943	0.000633677	0.00565862	0.00357211	Edn3/Cacna2d1/Ank3/Ccr2/Asph/Cacng4/Abl1/Ccl2/Atp1b1/Aplnr/Shank3	11
GO:0043254	BP	GO:0043254	regulation of protein-containing complex assembly	18/512	425/28943	0.000642674	0.00573058	0.00361754	Pfn2/Map2/Add3/Cd36/Selp/Add1/Pcsk5/Msn/Kirrel/Rdx/Tmod2/Scin/Abl1/Cdh5/Farp2/Dab2ip/Fscn1/Kank4	18
GO:0002043	BP	GO:0002043	blood vessel endothelial cell proliferation involved in sprouting angiogenesis	4/512	23/28943	0.000656131	0.00581662	0.00367185	Bmper/Sema5a/Aplnr/Ppp1r16b	4
GO:0010818	BP	GO:0010818	T cell chemotaxis	4/512	23/28943	0.000656131	0.00581662	0.00367185	Wnt5a/Ccr2/Xcl1/Cxcl12	4
GO:0031643	BP	GO:0031643	positive regulation of myelination	4/512	23/28943	0.000656131	0.00581662	0.00367185	Hgf/Pard3/Wasf3/Igf1	4
GO:1901623	BP	GO:1901623	regulation of lymphocyte chemotaxis	4/512	23/28943	0.000656131	0.00581662	0.00367185	Wnt5a/Ccr2/Xcl1/Ccl2	4
GO:0030199	BP	GO:0030199	collagen fibril organization	6/512	60/28943	0.000663816	0.00585923	0.00369875	Col14a1/Cyp1b1/Col11a1/Atp7a/Sfrp2/Tgfb2	6
GO:0031641	BP	GO:0031641	regulation of myelination	6/512	60/28943	0.000663816	0.00585923	0.00369875	Hgf/Pard3/Ptn/Jam2/Wasf3/Igf1	6
GO:0035924	BP	GO:0035924	cellular response to vascular endothelial growth factor stimulus	6/512	60/28943	0.000663816	0.00585923	0.00369875	Tcf4/Ccbe1/Pdgfra/Atp2b4/Dab2ip/Prkd2	6
GO:0030521	BP	GO:0030521	androgen receptor signaling pathway	5/512	40/28943	0.000670667	0.00587724	0.00371012	Dab2/Ube3a/Ddx17/Igf1/Zmiz1	5
GO:0032743	BP	GO:0032743	positive regulation of interleukin-2 production	5/512	40/28943	0.000670667	0.00587724	0.00371012	Ccr2/Ptprc/Abl1/Prkd2/Cd83	5
GO:0071425	BP	GO:0071425	hematopoietic stem cell proliferation	5/512	40/28943	0.000670667	0.00587724	0.00371012	Wnt5a/Dab2/Sfrp2/Snai2/Ace	5
GO:0071604	BP	GO:0071604	transforming growth factor beta production	5/512	40/28943	0.000670667	0.00587724	0.00371012	Itgb8/Hif1a/Tsku/Tgfb2/Fn1	5
GO:2000403	BP	GO:2000403	positive regulation of lymphocyte migration	5/512	40/28943	0.000670667	0.00587724	0.00371012	Wnt5a/Ccr2/Jam2/Xcl1/Cxcl12	5
GO:0055021	BP	GO:0055021	regulation of cardiac muscle tissue growth	7/512	83/28943	0.000678142	0.00592574	0.00374073	Col14a1/Rbpj/Tgfbr3/Igf1/Ccnd2/Nog/Rgs2	7
GO:0070373	BP	GO:0070373	negative regulation of ERK1 and ERK2 cascade	7/512	83/28943	0.000678142	0.00592574	0.00374073	Dab2/Arrb1/Igf1/Ptprc/Abl1/Dab2ip/Lif	7
GO:0006576	BP	GO:0006576	cellular biogenic amine metabolic process	8/512	108/28943	0.000681517	0.00593824	0.00374863	Atp7a/Abat/Maoa/Sult1d1/Maob/Tgfb2/Tdo2/Amd1	8
GO:1904063	BP	GO:1904063	negative regulation of cation transmembrane transport	8/512	108/28943	0.000681517	0.00593824	0.00374863	Kcnab1/Ank3/Slc43a2/Osr1/Atp7a/Calca/Rgs2/Tgfb2	8
GO:0034446	BP	GO:0034446	substrate adhesion-dependent cell spreading	8/512	109/28943	0.000724332	0.00629334	0.00397279	Has2/Lamc1/Dab2/Nedd9/Fzd4/Abl1/Fn1/Ntng2	8
GO:0048704	BP	GO:0048704	embryonic skeletal system morphogenesis	8/512	109/28943	0.000724332	0.00629334	0.00397279	Gli3/Col11a1/Osr1/Zeb1/Pdgfra/Osr2/Nog/Tgfb2	8
GO:0009582	BP	GO:0009582	detection of abiotic stimulus	9/512	136/28943	0.000728442	0.00631336	0.00398543	Col11a1/Piezo2/Arrb1/Sema5a/Igf1/Ano1/Cxcl12/Calca/Myc	9
GO:0045913	BP	GO:0045913	positive regulation of carbohydrate metabolic process	7/512	84/28943	0.000728703	0.00631336	0.00398543	Has2/Zbtb20/Cd36/Hif1a/Igf1/Myc/Pth1r	7
GO:0008064	BP	GO:0008064	regulation of actin polymerization or depolymerization	10/512	165/28943	0.000747389	0.00646608	0.00408183	Pfn2/Add3/Add1/Shroom2/Sema5a/Kirrel/Rdx/Tmod2/Scin/Kank4	10
GO:0051693	BP	GO:0051693	actin filament capping	5/512	41/28943	0.000752826	0.0065039	0.00410571	Add3/Add1/Rdx/Tmod2/Scin	5
GO:0009581	BP	GO:0009581	detection of external stimulus	9/512	137/28943	0.000767707	0.0066231	0.00418095	Col11a1/Piezo2/Arrb1/Sema5a/Igf1/Ano1/Cxcl12/Calca/Myc	9
GO:1902547	BP	GO:1902547	regulation of cellular response to vascular endothelial growth factor stimulus	4/512	24/28943	0.000776423	0.00668884	0.00422246	Tcf4/Ccbe1/Atp2b4/Dab2ip	4
GO:0001947	BP	GO:0001947	heart looping	6/512	62/28943	0.000791274	0.00678806	0.00428509	Wnt5a/Rbpj/Hif1a/Eng/Sufu/Aplnr	6
GO:0021872	BP	GO:0021872	forebrain generation of neurons	6/512	62/28943	0.000791274	0.00678806	0.00428509	Gli3/Dclk2/Lef1/Atp7a/Zmiz1/Shank3	6
GO:0045744	BP	GO:0045744	negative regulation of G protein-coupled receptor signaling pathway	6/512	62/28943	0.000791274	0.00678806	0.00428509	Arrb1/Atp2b4/Calca/Rgs2/Rnf157/Aplnr	6
GO:0032412	BP	GO:0032412	regulation of ion transmembrane transporter activity	14/512	293/28943	0.000800243	0.00685538	0.00432759	Cacna2d1/Kcnab1/Ank3/Ccr2/Osr1/Tcaf1/Asph/Atp7a/Tcaf2/Cacng4/Ccl2/Abcb1b/Atp1b1/Shank3	14
GO:0033157	BP	GO:0033157	regulation of intracellular protein transport	12/512	228/28943	0.000811016	0.00692998	0.00437468	Ect2/Gli3/Cd36/Ank3/Tcaf1/Xpo1/Asph/Tcaf2/Prr5l/C2cd5/Zdhhc2/Ccl2	12
GO:0030518	BP	GO:0030518	intracellular steroid hormone receptor signaling pathway	8/512	111/28943	0.000816455	0.00692998	0.00437468	Dab2/Clock/Ube3a/Ddx17/Rbfox2/Igf1/Zmiz1/Per1	8
GO:0002246	BP	GO:0002246	wound healing involved in inflammatory response	3/512	11/28943	0.000816893	0.00692998	0.00437468	Abi3bp/Ccr2/Hif1a	3
GO:0035701	BP	GO:0035701	hematopoietic stem cell migration	3/512	11/28943	0.000816893	0.00692998	0.00437468	Ccr2/Jam2/Ptprc	3
GO:0036302	BP	GO:0036302	atrioventricular canal development	3/512	11/28943	0.000816893	0.00692998	0.00437468	Has2/Rbpj/Eng	3
GO:0090091	BP	GO:0090091	positive regulation of extracellular matrix disassembly	3/512	11/28943	0.000816893	0.00692998	0.00437468	Sema5a/Tgfb2/Fscn1	3
GO:0110011	BP	GO:0110011	regulation of basement membrane organization	3/512	11/28943	0.000816893	0.00692998	0.00437468	Lama2/Lamc1/Nid1	3
GO:0051054	BP	GO:0051054	positive regulation of DNA metabolic process	15/512	328/28943	0.00082595	0.00699709	0.00441705	Egfr/Hgf/Ino80d/Cyp1b1/Hmbox1/Smarca2/Spire1/Ptprc/Tnks/Npm1/Wrn/Myc/Prkd2/Pogz/Mad2l2	15
GO:0007346	BP	GO:0007346	regulation of mitotic cell cycle	20/512	509/28943	0.000838306	0.00708591	0.00447311	Edn3/Pbx1/Egfr/Ppp2r5c/Cdc14a/Foxn3/Smarca2/Igf1/Ccnd2/Brd4/Adamts1/Hus1/Ptch1/Rdx/Abl1/Zmpste24/Myc/Ttc28/Ccl2/Usp2	20
GO:0014015	BP	GO:0014015	positive regulation of gliogenesis	7/512	86/28943	0.000838754	0.00708591	0.00447311	Ptn/Vim/Rtn4/Igf1/Nog/Myc/Lif	7
GO:0038084	BP	GO:0038084	vascular endothelial growth factor signaling pathway	5/512	42/28943	0.00084227	0.00709598	0.00447947	Tcf4/Ccbe1/Pdgfra/Dab2ip/Prkd2	5
GO:1900744	BP	GO:1900744	regulation of p38MAPK cascade	5/512	42/28943	0.00084227	0.00709598	0.00447947	Hgf/Ccr2/Mfhas1/Dab2ip/Per1	5
GO:0030832	BP	GO:0030832	regulation of actin filament length	10/512	168/28943	0.000858439	0.00719999	0.00454513	Pfn2/Add3/Add1/Shroom2/Sema5a/Kirrel/Rdx/Tmod2/Scin/Kank4	10
GO:0001755	BP	GO:0001755	neural crest cell migration	6/512	63/28943	0.000861688	0.00719999	0.00454513	Edn3/Zeb2/Hif1a/Sema5a/Ednrb/Fn1	6
GO:0006584	BP	GO:0006584	catecholamine metabolic process	6/512	63/28943	0.000861688	0.00719999	0.00454513	Atp7a/Abat/Maoa/Sult1d1/Maob/Tgfb2	6
GO:0009712	BP	GO:0009712	catechol-containing compound metabolic process	6/512	63/28943	0.000861688	0.00719999	0.00454513	Atp7a/Abat/Maoa/Sult1d1/Maob/Tgfb2	6
GO:0042698	BP	GO:0042698	ovulation cycle	6/512	63/28943	0.000861688	0.00719999	0.00454513	Ptn/Arrb1/Pdgfra/Fzd4/Adamts1/Ptx3	6
GO:0070098	BP	GO:0070098	chemokine-mediated signaling pathway	6/512	63/28943	0.000861688	0.00719999	0.00454513	Ccr2/Xcl1/Slit3/Hif1a/Cxcl12/Ccl2	6
GO:0070201	BP	GO:0070201	regulation of establishment of protein localization	22/512	587/28943	0.000875155	0.00730253	0.00460986	Ect2/Gli3/Cd36/Clock/Ank3/Cd38/Tcaf1/Arrb1/Hif1a/Xpo1/Pkdcc/Asph/Igf1/Abat/Ano1/Tcaf2/Prr5l/C2cd5/Zdhhc2/Tgfb2/Ccl2/Ppm1f	22
GO:0045621	BP	GO:0045621	positive regulation of lymphocyte differentiation	9/512	140/28943	0.000895963	0.00746595	0.00471302	Gli3/Ccr2/Smarca2/Lef1/Atp11c/Ptprc/Zmiz1/Cd83/Il15ra	9
GO:0045732	BP	GO:0045732	positive regulation of protein catabolic process	11/512	200/28943	0.00092552	0.00761234	0.00480543	Wnt5a/Dab2/Tiparp/Prickle1/Msn/Gpc3/Ankib1/Rnft2/Rdx/Nkd2/Dab2ip	11
GO:0002436	BP	GO:0002436	immune complex clearance by monocytes and macrophages	2/512	3/28943	0.000925993	0.00761234	0.00480543	Ccr2/Ccl2	2
GO:0010751	BP	GO:0010751	negative regulation of nitric oxide mediated signal transduction	2/512	3/28943	0.000925993	0.00761234	0.00480543	Spink1/Atp2b4	2
GO:0021775	BP	GO:0021775	smoothened signaling pathway involved in ventral spinal cord interneuron specification	2/512	3/28943	0.000925993	0.00761234	0.00480543	Gli3/Sufu	2
GO:0021776	BP	GO:0021776	smoothened signaling pathway involved in spinal cord motor neuron cell fate specification	2/512	3/28943	0.000925993	0.00761234	0.00480543	Gli3/Sufu	2
GO:0031104	BP	GO:0031104	dendrite regeneration	2/512	3/28943	0.000925993	0.00761234	0.00480543	Ptn/Matn2	2
GO:0036023	BP	GO:0036023	embryonic skeletal limb joint morphogenesis	2/512	3/28943	0.000925993	0.00761234	0.00480543	Osr1/Osr2	2
GO:0072194	BP	GO:0072194	kidney smooth muscle tissue development	2/512	3/28943	0.000925993	0.00761234	0.00480543	Osr1/Tshz3	2
GO:0090264	BP	GO:0090264	regulation of immune complex clearance by monocytes and macrophages	2/512	3/28943	0.000925993	0.00761234	0.00480543	Ccr2/Ccl2	2
GO:0090265	BP	GO:0090265	positive regulation of immune complex clearance by monocytes and macrophages	2/512	3/28943	0.000925993	0.00761234	0.00480543	Ccr2/Ccl2	2
GO:0045601	BP	GO:0045601	regulation of endothelial cell differentiation	5/512	43/28943	0.000939395	0.00770178	0.00486189	Akap11/Add1/Zeb1/Tmem100/Cdh5	5
GO:0048873	BP	GO:0048873	homeostasis of number of cells within a tissue	5/512	43/28943	0.000939395	0.00770178	0.00486189	Col14a1/Add1/Ccr2/Tex15/Lipa	5
GO:1904375	BP	GO:1904375	regulation of protein localization to cell periphery	9/512	141/28943	0.000942389	0.00771104	0.00486774	Gnai1/Egfr/Dab2/Pid1/Gpc6/Pkdcc/Atp2b4/Zdhhc2/Nkd2	9
GO:0051651	BP	GO:0051651	maintenance of location in cell	12/512	232/28943	0.000943049	0.00771104	0.00486774	Ank3/Vps13d/Xcl1/Asph/Ptprc/Dzip1/Slc30a4/Scin/Abl1/Tgfb2/Ccr5/Aplnr	12
GO:0045444	BP	GO:0045444	fat cell differentiation	13/512	265/28943	0.000957319	0.00781725	0.00493479	Runx1t1/Wnt5a/Steap4/Arid5b/Creb5/Zfp516/Tbl1x/Igf1/Pdgfra/Medag/Sfrp2/Snai2/Rgs2	13
GO:0071695	BP	GO:0071695	anatomical structure maturation	14/512	299/28943	0.000972401	0.00792981	0.00500584	Wnt5a/Dlg2/Rbpj/Spink1/Ank3/Hif1a/Igf1/Ednrb/Calca/B4galt6/Cdh5/Farp2/Pth1r/Tgfb2	14
GO:0007160	BP	GO:0007160	cell-matrix adhesion	12/512	233/28943	0.000978715	0.00797066	0.00503163	Cd36/Itgb8/Nid1/Dlc1/Macf1/Sned1/Epdr1/Pcsk5/Abl1/Slk/Fn1/Ppm1f	12
GO:0042770	BP	GO:0042770	signal transduction in response to DNA damage	10/512	171/28943	0.000982695	0.00799242	0.00504536	Clock/Ppp2r5c/Foxn3/Brd4/Npm1/Hus1/Abl1/Snai2/Zmpste24/Mad2l2	10
GO:0033002	BP	GO:0033002	muscle cell proliferation	13/512	266/28943	0.000990705	0.00804684	0.00507972	Rbpj/Rgs5/Hgf/Pdgfd/Tgfbr3/Hif1a/Igf1/Ccnd2/Nog/Adamts1/Myc/Tgfb2/Notch3	13
GO:0006469	BP	GO:0006469	negative regulation of protein kinase activity	11/512	202/28943	0.00100355	0.00814035	0.00513875	Heg1/Cbl/Ptprc/Adar/Ppm1e/Npm1/Sfrp2/Abl1/Rgs2/Dab2ip/Ppm1f	11
GO:0033365	BP	GO:0033365	protein localization to organelle	30/512	916/28943	0.00101075	0.00818791	0.00516877	Ect2/Dlg2/Gli3/Akap11/Cd36/Gpc6/Dclk1/Smc5/Mid1/Vps13d/Macf1/Dclk2/Prickle1/Rtn4/Xpo1/Mfhas1/Tex15/Msn/Adar/Cacng4/Tnks/Npm1/Dzip1/Tram2/Wrn/Rdx/Zfp423/Tgfb2/Tnpo1/Lif	30
GO:0007204	BP	GO:0007204	positive regulation of cytosolic calcium ion concentration	12/512	234/28943	0.0010155	0.00821544	0.00518615	Cacna2d1/Cd36/Synpo/Ccr2/Cd38/Asph/Ednrb/Pdgfra/Calca/Abl1/Pth1r/Ccr5	12
GO:0090497	BP	GO:0090497	mesenchymal cell migration	6/512	65/28943	0.00101692	0.00821604	0.00518653	Edn3/Zeb2/Hif1a/Sema5a/Ednrb/Fn1	6
GO:0006790	BP	GO:0006790	sulfur compound metabolic process	15/512	335/28943	0.00102101	0.0082382	0.00520052	Acot7/Mamdc2/Acaca/Egflam/Ednrb/Chst2/Spock2/Sult1d1/Gstm1/Arsb/Gamt/Tdo2/Mtr/Acot11/Amd1	15
GO:0032886	BP	GO:0032886	regulation of microtubule-based process	13/512	268/28943	0.00106041	0.00853726	0.00538931	Gnai1/Map2/Fez1/Mid1/Macf1/Xpo1/Npm1/Abl1/Cdh5/Mark2/Tacc1/Tpx2/Tac2	13
GO:0010829	BP	GO:0010829	negative regulation of glucose transmembrane transport	4/512	26/28943	0.00106227	0.00853726	0.00538931	Pid1/Grb10/Myc/Ace	4
GO:0099010	BP	GO:0099010	modification of postsynaptic structure	4/512	26/28943	0.00106227	0.00853726	0.00538931	Pfn2/Filip1/Synpo/Wasf3	4
GO:0035296	BP	GO:0035296	regulation of tube diameter	10/512	173/28943	0.00107344	0.00856015	0.00540375	Edn3/Add3/Tgfbr3/Cd38/Hif1a/Ednrb/Calca/Abl1/Rgs2/Ace	10
GO:0097746	BP	GO:0097746	blood vessel diameter maintenance	10/512	173/28943	0.00107344	0.00856015	0.00540375	Edn3/Add3/Tgfbr3/Cd38/Hif1a/Ednrb/Calca/Abl1/Rgs2/Ace	10
GO:0042135	BP	GO:0042135	neurotransmitter catabolic process	3/512	12/28943	0.00107492	0.00856015	0.00540375	Abat/Maoa/Maob	3
GO:0051798	BP	GO:0051798	positive regulation of hair follicle development	3/512	12/28943	0.00107492	0.00856015	0.00540375	Wnt5a/Fst/Tgfb2	3
GO:1901620	BP	GO:1901620	regulation of smoothened signaling pathway involved in dorsal/ventral neural tube patterning	3/512	12/28943	0.00107492	0.00856015	0.00540375	Gli3/Sufu/Gpr161	3
GO:1903960	BP	GO:1903960	negative regulation of anion transmembrane transport	3/512	12/28943	0.00107492	0.00856015	0.00540375	Slc43a2/Tcaf2/Rgs2	3
GO:1905208	BP	GO:1905208	negative regulation of cardiocyte differentiation	3/512	12/28943	0.00107492	0.00856015	0.00540375	Egfr/Prickle1/Ccnd2	3
GO:0071902	BP	GO:0071902	positive regulation of protein serine/threonine kinase activity	11/512	204/28943	0.00108693	0.00864452	0.00545701	Edn3/Wnt5a/Egfr/Pdgfd/Zeb2/Igf1/Ccnd2/Atp2b4/Ptprc/Fzd4/Dab2ip	11
GO:1904035	BP	GO:1904035	regulation of epithelial cell apoptotic process	8/512	116/28943	0.00108836	0.00864457	0.00545705	Col18a1/Sema5a/Igf1/Adar/Sfrp4/Abl1/Cdh5/Ccl2	8
GO:0042471	BP	GO:0042471	ear morphogenesis	9/512	144/28943	0.0010935	0.00867417	0.00547573	Wnt5a/Cthrc1/Col11a1/Osr1/Tshz1/Zeb1/Osr2/Nog/Myc	9
GO:0048286	BP	GO:0048286	lung alveolus development	6/512	66/28943	0.00110215	0.00870888	0.00549764	Hopx/Pkdcc/Atp7a/Igf1/Ace/Lif	6
GO:0070231	BP	GO:0070231	T cell apoptotic process	6/512	66/28943	0.00110215	0.00870888	0.00549764	Wnt5a/Gli3/Hif1a/Tsc22d3/St3gal1/Tgfb2	6
GO:0072678	BP	GO:0072678	T cell migration	6/512	66/28943	0.00110215	0.00870888	0.00549764	Wnt5a/Ccr2/Xcl1/Msn/Cxcl12/Ccl2	6
GO:0022898	BP	GO:0022898	regulation of transmembrane transporter activity	14/512	303/28943	0.00110369	0.00870973	0.00549818	Cacna2d1/Kcnab1/Ank3/Ccr2/Osr1/Tcaf1/Asph/Atp7a/Tcaf2/Cacng4/Ccl2/Abcb1b/Atp1b1/Shank3	14
GO:0001936	BP	GO:0001936	regulation of endothelial cell proliferation	10/512	174/28943	0.00112131	0.00882602	0.00557159	Wnt5a/Col18a1/Sema5a/Igf1/Cxcl12/Eng/Prkd2/Ccl2/Aplnr/Ppp1r16b	10
GO:0035150	BP	GO:0035150	regulation of tube size	10/512	174/28943	0.00112131	0.00882602	0.00557159	Edn3/Add3/Tgfbr3/Cd38/Hif1a/Ednrb/Calca/Abl1/Rgs2/Ace	10
GO:0038127	BP	GO:0038127	ERBB signaling pathway	8/512	117/28943	0.00115053	0.00904433	0.0057094	Rbpj/Egfr/Rtn4/Cbl/Areg/Abl1/Dab2ip/Fam83a	8
GO:0010935	BP	GO:0010935	regulation of macrophage cytokine production	5/512	45/28943	0.0011583	0.00908203	0.0057332	Wnt5a/Cd36/Rtn4/Gprc5b/Tgfb2	5
GO:0061098	BP	GO:0061098	positive regulation of protein tyrosine kinase activity	5/512	45/28943	0.0011583	0.00908203	0.0057332	Nedd9/Abi2/Gprc5b/Areg/Ace	5
GO:0006029	BP	GO:0006029	proteoglycan metabolic process	7/512	91/28943	0.0011717	0.00916359	0.00578469	Col11a1/Mamdc2/Egflam/Igf1/Spock2/Extl3/Arsb	7
GO:0060420	BP	GO:0060420	regulation of heart growth	7/512	91/28943	0.0011717	0.00916359	0.00578469	Col14a1/Rbpj/Tgfbr3/Igf1/Ccnd2/Nog/Rgs2	7
GO:0002262	BP	GO:0002262	myeloid cell homeostasis	11/512	206/28943	0.00117595	0.0091733	0.00579082	Rps24/Tgfbr3/Add1/Ccr2/Hif1a/Mfhas1/Rbfox2/Adar/Heph/Lipa/Ccl2	11
GO:0032271	BP	GO:0032271	regulation of protein polymerization	11/512	206/28943	0.00117595	0.0091733	0.00579082	Pfn2/Map2/Add3/Add1/Kirrel/Rdx/Tmod2/Scin/Abl1/Cdh5/Kank4	11
GO:0048008	BP	GO:0048008	platelet-derived growth factor receptor signaling pathway	6/512	67/28943	0.00119276	0.0092926	0.00586613	Arid5b/Tiparp/Pdgfd/Cbl/Pdgfra/Abl1	6
GO:0043401	BP	GO:0043401	steroid hormone mediated signaling pathway	8/512	118/28943	0.00121551	0.00944569	0.00596277	Dab2/Clock/Ube3a/Ddx17/Rbfox2/Igf1/Zmiz1/Per1	8
GO:0051897	BP	GO:0051897	positive regulation of protein kinase B signaling	8/512	118/28943	0.00121551	0.00944569	0.00596277	Egfr/Rtn4/Mfhas1/Sema5a/Igf1/Cxcl12/Eng/Cpne1	8
GO:0051235	BP	GO:0051235	maintenance of location	15/512	341/28943	0.00121789	0.00945218	0.00596687	Cd36/Ank3/Vps13d/Xcl1/Asph/Ptprc/Dzip1/Slc30a4/Scin/Abl1/Sufu/Tgfb2/Ccr5/Mest/Aplnr	15
GO:0072012	BP	GO:0072012	glomerulus vasculature development	4/512	27/28943	0.00122972	0.00951982	0.00600956	Pdgfd/Osr1/Pdgfra/Notch3	4
GO:2000647	BP	GO:2000647	negative regulation of stem cell proliferation	4/512	27/28943	0.00122972	0.00951982	0.00600956	Rbpj/Gli3/Ptch1/Snai2	4
GO:2001259	BP	GO:2001259	positive regulation of cation channel activity	7/512	92/28943	0.00124923	0.00965862	0.00609718	Cacna2d1/Ank3/Ccr2/Asph/Cacng4/Ccl2/Shank3	7
GO:0071407	BP	GO:0071407	cellular response to organic cyclic compound	21/512	565/28943	0.00125875	0.00971987	0.00613585	Gnai1/Gramd1b/Egfr/Dab2/Tiparp/Clock/Ube3a/Cyp1b1/Pde2a/Ddx17/Rbfox2/Igf1/Atp2b4/Msn/Npm1/Zmiz1/Ptch1/Snai2/Ccl2/Adcy3/Per1	21
GO:0010469	BP	GO:0010469	regulation of signaling receptor activity	9/512	147/28943	0.00126364	0.00974537	0.00615195	Ccr2/Dlgap4/Hif1a/Cbl/Areg/Nog/Cacng4/Ccl2/Shank3	9
GO:0021955	BP	GO:0021955	central nervous system neuron axonogenesis	5/512	46/28943	0.0012809	0.00985355	0.00622024	Cdh11/Dclk1/Zeb2/Tsku/B4galt6	5
GO:0030517	BP	GO:0030517	negative regulation of axon extension	5/512	46/28943	0.0012809	0.00985355	0.00622024	Map2/Wnt5a/Rtn4/Sema5a/Ccr5	5
GO:2000106	BP	GO:2000106	regulation of leukocyte apoptotic process	8/512	119/28943	0.00128337	0.00985355	0.00622024	Wnt5a/Hif1a/Tsc22d3/St3gal1/Cxcl12/Myc/Tgfb2/Ccr5	8
GO:0072659	BP	GO:0072659	protein localization to plasma membrane	14/512	308/28943	0.00128843	0.00985355	0.00622024	Egfr/Dab2/Pid1/Ank3/Macf1/Pkdcc/Atp2b4/Ptch1/Rdx/Kcnip3/C2cd5/Zdhhc2/Nkd2/Atp1b1	14
GO:0050771	BP	GO:0050771	negative regulation of axonogenesis	6/512	68/28943	0.00128896	0.00985355	0.00622024	Map2/Wnt5a/Rtn4/Sema5a/Ccr5/Efnb3	6
GO:0060389	BP	GO:0060389	pathway-restricted SMAD protein phosphorylation	6/512	68/28943	0.00128896	0.00985355	0.00622024	Bmper/Dab2/Tgfbr3/Nog/Eng/Tgfb2	6
GO:0061371	BP	GO:0061371	determination of heart left/right asymmetry	6/512	68/28943	0.00128896	0.00985355	0.00622024	Wnt5a/Rbpj/Hif1a/Eng/Sufu/Aplnr	6
GO:0071887	BP	GO:0071887	leukocyte apoptotic process	9/512	148/28943	0.00132488	0.0101028	0.00637759	Wnt5a/Gli3/Hif1a/Tsc22d3/St3gal1/Cxcl12/Myc/Tgfb2/Ccr5	9
GO:1904019	BP	GO:1904019	epithelial cell apoptotic process	9/512	148/28943	0.00132488	0.0101028	0.00637759	Col18a1/Lef1/Sema5a/Igf1/Adar/Sfrp4/Abl1/Cdh5/Ccl2	9
GO:0048871	BP	GO:0048871	multicellular organismal homeostasis	22/512	607/28943	0.00134103	0.0102133	0.00644731	Col14a1/Rbpj/Akap11/Cd36/Grb10/Add1/Acaca/Ccr2/Cd38/Zfp516/Tex15/Ednrb/Abat/Tsku/Apbb2/Lipa/Calca/Zfp423/Pth1r/Rrp8/Ccr5/Acot11	22
GO:0071675	BP	GO:0071675	regulation of mononuclear cell migration	8/512	120/28943	0.00135422	0.0103008	0.00650259	Wnt5a/Pdgfd/Ccr2/Jam2/Xcl1/Msn/Cxcl12/Ccl2	8
GO:1902107	BP	GO:1902107	positive regulation of leukocyte differentiation	11/512	210/28943	0.00137202	0.0104103	0.0065717	Gli3/Ccr2/Smarca2/Lef1/Atp11c/Ptprc/Zmiz1/Calca/Lif/Cd83/Il15ra	11
GO:1903708	BP	GO:1903708	positive regulation of hemopoiesis	11/512	210/28943	0.00137202	0.0104103	0.0065717	Gli3/Ccr2/Smarca2/Lef1/Atp11c/Ptprc/Zmiz1/Calca/Lif/Cd83/Il15ra	11
GO:0021860	BP	GO:0021860	pyramidal neuron development	3/512	13/28943	0.00137911	0.0104253	0.00658115	Dclk2/Atp7a/Zmiz1	3
GO:0030949	BP	GO:0030949	positive regulation of vascular endothelial growth factor receptor signaling pathway	3/512	13/28943	0.00137911	0.0104253	0.00658115	Grb10/Hif1a/Prkd2	3
GO:0060272	BP	GO:0060272	embryonic skeletal joint morphogenesis	3/512	13/28943	0.00137911	0.0104253	0.00658115	Osr1/Osr2/Nog	3
GO:0031214	BP	GO:0031214	biomineral tissue development	10/512	179/28943	0.00138759	0.0104635	0.00660526	Ptn/Osr1/Hif1a/Pkdcc/Igf1/Osr2/Gpc3/Zmpste24/Pth1r/Wnt6	10
GO:0071478	BP	GO:0071478	cellular response to radiation	10/512	179/28943	0.00138759	0.0104635	0.00660526	Ect2/Mme/Clock/Ccnd2/Npm1/Hus1/Wrn/Sfrp2/Snai2/Zmpste24	10
GO:0003143	BP	GO:0003143	embryonic heart tube morphogenesis	6/512	69/28943	0.00139098	0.0104761	0.00661322	Wnt5a/Rbpj/Hif1a/Eng/Sufu/Aplnr	6
GO:0042417	BP	GO:0042417	dopamine metabolic process	5/512	47/28943	0.00141282	0.0105643	0.0066689	Atp7a/Abat/Maoa/Maob/Tgfb2	5
GO:0050974	BP	GO:0050974	detection of mechanical stimulus involved in sensory perception	5/512	47/28943	0.00141282	0.0105643	0.0066689	Col11a1/Piezo2/Igf1/Cxcl12/Myc	5
GO:0003171	BP	GO:0003171	atrioventricular valve development	4/512	28/28943	0.0014148	0.0105643	0.0066689	Mdm4/Slit3/Tgfb2/Aplnr	4
GO:0021801	BP	GO:0021801	cerebral cortex radial glia-guided migration	4/512	28/28943	0.0014148	0.0105643	0.0066689	Gli3/Rtn4/Zmiz1/Dab2ip	4
GO:0022030	BP	GO:0022030	telencephalon glial cell migration	4/512	28/28943	0.0014148	0.0105643	0.0066689	Gli3/Rtn4/Zmiz1/Dab2ip	4
GO:0061437	BP	GO:0061437	renal system vasculature development	4/512	28/28943	0.0014148	0.0105643	0.0066689	Pdgfd/Osr1/Pdgfra/Notch3	4
GO:0061440	BP	GO:0061440	kidney vasculature development	4/512	28/28943	0.0014148	0.0105643	0.0066689	Pdgfd/Osr1/Pdgfra/Notch3	4
GO:0001890	BP	GO:0001890	placenta development	10/512	180/28943	0.00144656	0.0107883	0.0068103	Rbpj/Egfr/Ptn/Ndp/Prdm1/Hif1a/Lef1/Tcf23/Xist/Lif	10
GO:0046328	BP	GO:0046328	regulation of JNK cascade	9/512	150/28943	0.00145452	0.0108344	0.00683941	Wnt5a/Egfr/Dab2/Eda2r/Mfhas1/Sfrp4/Sfrp2/Dab2ip/Per1	9
GO:2001020	BP	GO:2001020	regulation of response to DNA damage stimulus	14/512	313/28943	0.00149836	0.0111474	0.007037	Egfr/Ino80d/Smarca2/Spire1/Tex15/Cxcl12/Brd4/Npm1/Abl1/Snai2/Zmpste24/Myc/Pogz/Mad2l2	14
GO:0043535	BP	GO:0043535	regulation of blood vessel endothelial cell migration	7/512	95/28943	0.00150611	0.0111914	0.00706478	Stard13/Col18a1/Hif1a/Igf1/Atp2b4/Abl1/Prkd2	7
GO:0031333	BP	GO:0031333	negative regulation of protein-containing complex assembly	9/512	151/28943	0.00152306	0.0112898	0.00712693	Pfn2/Map2/Add3/Add1/Rdx/Tmod2/Scin/Cdh5/Kank4	9
GO:1900180	BP	GO:1900180	regulation of protein localization to nucleus	9/512	151/28943	0.00152306	0.0112898	0.00712693	Ect2/Gli3/Cd36/Dclk1/Dclk2/Mfhas1/Npm1/Tgfb2/Lif	9
GO:1902105	BP	GO:1902105	regulation of leukocyte differentiation	15/512	349/28943	0.00152929	0.0113223	0.0071474	Gli3/Prdm1/Ccr2/Smarca2/Lef1/Zeb1/Atp11c/Ptprc/Zmiz1/Calca/Abl1/Myc/Lif/Cd83/Il15ra	15
GO:0050865	BP	GO:0050865	regulation of cell activation	27/512	817/28943	0.00156358	0.0115621	0.00729882	Vav3/Wnt5a/Gli3/Selp/Prdm1/Ccr2/Cd38/Smarca2/Xcl1/Lef1/Zeb1/Mfhas1/Atp11c/Igf1/Abat/Pdgfra/Ptprc/Lmo1/Zmiz1/Abl1/Il13ra2/Fn1/Ccl2/Mad2l2/Efnb3/Cd83/Il15ra	27
GO:0050764	BP	GO:0050764	regulation of phagocytosis	8/512	123/28943	0.00158557	0.0116965	0.00738362	Pros1/Cd36/Camk1d/Ptprc/Ptx3/Masp1/Ccl2/Il15ra	8
GO:1902414	BP	GO:1902414	protein localization to cell junction	8/512	123/28943	0.00158557	0.0116965	0.00738362	Jak1/Dlg2/Gpc6/Heg1/Slitrk3/Clstn1/Zdhhc2/Cdh5	8
GO:0007044	BP	GO:0007044	cell-substrate junction assembly	7/512	96/28943	0.0016003	0.0117909	0.00744323	Lamc1/Dlc1/Macf1/Abl1/Slk/Fn1/Ppm1f	7
GO:0014009	BP	GO:0014009	glial cell proliferation	6/512	71/28943	0.00161337	0.0118106	0.00745565	Ptn/Vim/Igf1/Areg/Myc/Shank3	6
GO:0042733	BP	GO:0042733	embryonic digit morphogenesis	6/512	71/28943	0.00161337	0.0118106	0.00745565	Wnt5a/Gli3/Osr1/Osr2/Nog/Sfrp2	6
GO:0043087	BP	GO:0043087	regulation of GTPase activity	15/512	351/28943	0.00161678	0.0118106	0.00745565	Ect2/Vav3/Wnt5a/Ric1/Dennd1a/Ralgapa1/Nedd9/Xcl1/Arrb1/Ralgps2/Fgd1/Rdx/Tiam2/Dab2ip/Ccl2	15
GO:0030318	BP	GO:0030318	melanocyte differentiation	4/512	29/28943	0.00161844	0.0118106	0.00745565	Edn3/Gli3/Zeb2/Ednrb	4
GO:0048745	BP	GO:0048745	smooth muscle tissue development	4/512	29/28943	0.00161844	0.0118106	0.00745565	Tiparp/Osr1/Tshz3/Eng	4
GO:0060571	BP	GO:0060571	morphogenesis of an epithelial fold	4/512	29/28943	0.00161844	0.0118106	0.00745565	Wnt5a/Egfr/Hif1a/Nog	4
GO:1903055	BP	GO:1903055	positive regulation of extracellular matrix organization	4/512	29/28943	0.00161844	0.0118106	0.00745565	Sema5a/Abl1/Tgfb2/Fscn1	4
GO:1903649	BP	GO:1903649	regulation of cytoplasmic transport	4/512	29/28943	0.00161844	0.0118106	0.00745565	Map2/Dab2/Msn/Rdx	4
GO:0007369	BP	GO:0007369	gastrulation	10/512	183/28943	0.0016358	0.0119088	0.00751764	Wnt5a/Osr1/Macf1/Lef1/Osr2/Nog/Sfrp2/Fn1/Poglut1/Aplnr	10
GO:0060041	BP	GO:0060041	retina development in camera-type eye	10/512	183/28943	0.0016358	0.0119088	0.00751764	Rorb/Cyp1b1/Ptn/Ndp/Hif1a/Slc4a7/Pdgfra/Fzd4/Tgfb2/Lif	10
GO:0031058	BP	GO:0031058	positive regulation of histone modification	8/512	124/28943	0.00166928	0.0121381	0.00766238	Rps6ka5/Arrb1/Brd4/Snai2/Prkd2/Rrp8/Aplnr/Lif	8
GO:0009410	BP	GO:0009410	response to xenobiotic stimulus	14/512	317/28943	0.0016862	0.0122319	0.00772165	Vav3/Add3/Cyp26a1/Cyp1b1/Cd38/Fzd1/Abat/Ppm1e/Gstm1/Sfrp2/Myc/Tgfb2/Ppm1f/Abcb1b	14
GO:0032409	BP	GO:0032409	regulation of transporter activity	14/512	317/28943	0.0016862	0.0122319	0.00772165	Cacna2d1/Kcnab1/Ank3/Ccr2/Osr1/Tcaf1/Asph/Atp7a/Tcaf2/Cacng4/Ccl2/Abcb1b/Atp1b1/Shank3	14
GO:0070232	BP	GO:0070232	regulation of T cell apoptotic process	5/512	49/28943	0.00170632	0.0123632	0.00780451	Wnt5a/Hif1a/Tsc22d3/St3gal1/Tgfb2	5
GO:0010359	BP	GO:0010359	regulation of anion channel activity	3/512	14/28943	0.00173228	0.0125059	0.0078946	Tcaf1/Tcaf2/Abcb1b	3
GO:0046886	BP	GO:0046886	positive regulation of hormone biosynthetic process	3/512	14/28943	0.00173228	0.0125059	0.0078946	Dab2/Hif1a/Igf1	3
GO:0090179	BP	GO:0090179	planar cell polarity pathway involved in neural tube closure	3/512	14/28943	0.00173228	0.0125059	0.0078946	Wnt5a/Fzd1/Sfrp2	3
GO:0035065	BP	GO:0035065	regulation of histone acetylation	6/512	72/28943	0.0017342	0.0125059	0.0078946	Rps6ka5/Arrb1/Zfp451/Snai2/Zmpste24/Lif	6
GO:0048609	BP	GO:0048609	multicellular organismal reproductive process	29/512	907/28943	0.00174329	0.0125566	0.00792659	Racgap1/Fst/Clock/Spink1/Ptn/Prdm1/Jam2/Arrb1/Abcg2/Spire1/Scmh1/Tex15/Igf1/Ednrb/Pdgfra/Cxcl12/Pcyt1b/Fzd4/Zmiz1/Adamts1/Dzip1/Meig1/Calca/Ptx3/Tcf23/Rgs2/Gamt/Ace/Lif	29
GO:2000177	BP	GO:2000177	regulation of neural precursor cell proliferation	8/512	125/28943	0.00175644	0.0126365	0.00797701	Wnt5a/Gli3/Ptn/Hif1a/Igf1/Nog/Zfp423/Ccr5	8
GO:0030010	BP	GO:0030010	establishment of cell polarity	9/512	155/28943	0.00182361	0.0129689	0.00818689	Map2/Wnt5a/Fez1/Pard3/Msn/Cdh5/Mark2/Fbf1/Fscn1	9
GO:0051092	BP	GO:0051092	positive regulation of NF-kappaB transcription factor activity	9/512	155/28943	0.00182361	0.0129689	0.00818689	Wnt5a/Cd36/Clock/Tgfbr3/Eda2r/Rps6ka5/Erc1/Npm1/Prkd2	9
GO:0003273	BP	GO:0003273	cell migration involved in endocardial cushion formation	2/512	4/28943	0.00183026	0.0129689	0.00818689	Snai2/Eng	2
GO:0006933	BP	GO:0006933	negative regulation of cell adhesion involved in substrate-bound cell migration	2/512	4/28943	0.00183026	0.0129689	0.00818689	Ptprc/Snai2	2
GO:0007223	BP	GO:0007223	Wnt signaling pathway, calcium modulating pathway	2/512	4/28943	0.00183026	0.0129689	0.00818689	Wnt5a/Fzd4	2
GO:0014826	BP	GO:0014826	vein smooth muscle contraction	2/512	4/28943	0.00183026	0.0129689	0.00818689	Edn3/Ednrb	2
GO:0030035	BP	GO:0030035	microspike assembly	2/512	4/28943	0.00183026	0.0129689	0.00818689	Abl1/Fscn1	2
GO:0072131	BP	GO:0072131	kidney mesenchyme morphogenesis	2/512	4/28943	0.00183026	0.0129689	0.00818689	Osr1/Myc	2
GO:0072133	BP	GO:0072133	metanephric mesenchyme morphogenesis	2/512	4/28943	0.00183026	0.0129689	0.00818689	Osr1/Myc	2
GO:0110135	BP	GO:0110135	Norrin signaling pathway	2/512	4/28943	0.00183026	0.0129689	0.00818689	Ndp/Fzd4	2
GO:1990787	BP	GO:1990787	negative regulation of hh target transcription factor activity	2/512	4/28943	0.00183026	0.0129689	0.00818689	Gli3/Sufu	2
GO:2000412	BP	GO:2000412	positive regulation of thymocyte migration	2/512	4/28943	0.00183026	0.0129689	0.00818689	Ccr2/Xcl1	2
GO:2000439	BP	GO:2000439	positive regulation of monocyte extravasation	2/512	4/28943	0.00183026	0.0129689	0.00818689	Pdgfd/Ccr2	2
GO:0034504	BP	GO:0034504	protein localization to nucleus	14/512	320/28943	0.00183959	0.0129874	0.00819851	Ect2/Gli3/Cd36/Dclk1/Dclk2/Prickle1/Xpo1/Mfhas1/Adar/Npm1/Wrn/Tgfb2/Tnpo1/Lif	14
GO:0060907	BP	GO:0060907	positive regulation of macrophage cytokine production	4/512	30/28943	0.00184159	0.0129874	0.00819851	Wnt5a/Cd36/Rtn4/Gprc5b	4
GO:0071353	BP	GO:0071353	cellular response to interleukin-4	4/512	30/28943	0.00184159	0.0129874	0.00819851	Nfil3/Xcl1/Lef1/Mrc1	4
GO:0048639	BP	GO:0048639	positive regulation of developmental growth	11/512	218/28943	0.00184486	0.0129874	0.00819851	Rbpj/Hopx/Tgfbr3/Macf1/Cpne5/Sema5a/Igf1/Ccnd2/Cxcl12/Fn1/Rnf157	11
GO:0002688	BP	GO:0002688	regulation of leukocyte chemotaxis	8/512	126/28943	0.00184716	0.0129874	0.00819851	Edn3/Wnt5a/Ptn/Ccr2/Xcl1/Camk1d/Cxcl12/Ccl2	8
GO:0048640	BP	GO:0048640	negative regulation of developmental growth	8/512	126/28943	0.00184716	0.0129874	0.00819851	Map2/Wnt5a/Rtn4/Sema5a/Nog/Ptch1/Rgs2/Ccr5	8
GO:0051345	BP	GO:0051345	positive regulation of hydrolase activity	20/512	544/28943	0.00184774	0.0129874	0.00819851	Ect2/Wnt5a/Ric1/Dlc1/Dennd1a/Ralgapa1/Nedd9/Xcl1/Arrb1/Ralgps2/Asph/Pdgfra/Ptprc/Wrn/Sfrp2/Tiam2/Myc/Prkd2/Ccl2/Ppm1f	20
GO:0061035	BP	GO:0061035	regulation of cartilage development	6/512	73/28943	0.00186178	0.013041	0.00823238	Wnt5a/Gli3/Pkdcc/Nog/Snai2/Tgfb2	6
GO:1990868	BP	GO:1990868	response to chemokine	6/512	73/28943	0.00186178	0.013041	0.00823238	Ccr2/Xcl1/Slit3/Hif1a/Cxcl12/Ccl2	6
GO:1990869	BP	GO:1990869	cellular response to chemokine	6/512	73/28943	0.00186178	0.013041	0.00823238	Ccr2/Xcl1/Slit3/Hif1a/Cxcl12/Ccl2	6
GO:0007611	BP	GO:0007611	learning or memory	14/512	321/28943	0.00189322	0.0132461	0.00836182	Mme/Kcnab1/Ube3a/Ptn/Synpo/Hif1a/Abi2/Igf1/Ccnd2/Nog/Tmod2/Abl1/Adcy3/Shank3	14
GO:0001666	BP	GO:0001666	response to hypoxia	11/512	219/28943	0.00191231	0.0133643	0.00843644	Kcnd2/Rbpj/Cd38/Rtn4/Hif1a/Abat/Ddah1/Eng/Myc/Tgfb2/Atp1b1	11
GO:0051260	BP	GO:0051260	protein homooligomerization	10/512	187/28943	0.00191882	0.0133945	0.00845552	Kcnd2/Ect2/Steap4/Acaca/Scara5/Kcnd3/Aqp11/Tdo2/Spast/Kctd12	10
GO:0018958	BP	GO:0018958	phenol-containing compound metabolic process	8/512	127/28943	0.00194154	0.0135376	0.00854586	Wnt5a/Zeb2/Atp7a/Abat/Maoa/Sult1d1/Maob/Tgfb2	8
GO:0140352	BP	GO:0140352	export from cell	31/512	999/28943	0.00194661	0.0135574	0.00855839	Edn3/Pfn2/Nkg7/Dab2/Clock/Ric1/Ppfia2/Lin7a/Nrn1/Ccr2/Cd38/Erc1/Arrb1/Rtn4/Abcg2/Hif1a/Kcnd3/Igf1/Ednrb/Abat/Ano1/Cxcl12/Fzd4/Il13ra2/Nkd2/Maob/Syt15/Tgfb2/Abcb1b/Atp1b1/Lif	31
GO:0050890	BP	GO:0050890	cognition	15/512	358/28943	0.0019567	0.0136122	0.00859296	Mme/Kcnab1/Ube3a/Ptn/Synpo/Hif1a/Abi2/Shroom4/Igf1/Ccnd2/Nog/Tmod2/Abl1/Adcy3/Shank3	15
GO:0003012	BP	GO:0003012	muscle system process	17/512	432/28943	0.00196866	0.0136798	0.00863564	Col14a1/Edn3/Cacna2d1/Cd38/Tshz3/Igf1/Ednrb/Abat/Atp2b4/Apbb2/Calca/Tmod2/Mef2a/Rgs2/Srl/Synm/Atp1b1	17
GO:0045580	BP	GO:0045580	regulation of T cell differentiation	10/512	188/28943	0.00199542	0.0137937	0.00870754	Gli3/Prdm1/Ccr2/Smarca2/Lef1/Zeb1/Ptprc/Zmiz1/Abl1/Cd83	10
GO:0110148	BP	GO:0110148	biomineralization	10/512	188/28943	0.00199542	0.0137937	0.00870754	Ptn/Osr1/Hif1a/Pkdcc/Igf1/Osr2/Gpc3/Zmpste24/Pth1r/Wnt6	10
GO:0010633	BP	GO:0010633	negative regulation of epithelial cell migration	6/512	74/28943	0.00199634	0.0137937	0.00870754	Pfn2/Stard13/Tgfbr3/Ptprg/Atp2b4/Dab2ip	6
GO:0030032	BP	GO:0030032	lamellipodium assembly	6/512	74/28943	0.00199634	0.0137937	0.00870754	Vav3/Ablim1/Abi2/Wasf3/Atp7a/Fscn1	6
GO:0042982	BP	GO:0042982	amyloid precursor protein metabolic process	6/512	74/28943	0.00199634	0.0137937	0.00870754	Adam19/Rtn4/Igf1/Itm2a/Spon1/Ago2	6
GO:0001819	BP	GO:0001819	positive regulation of cytokine production	19/512	509/28943	0.00200614	0.0138458	0.00874042	Zbtb20/Wnt5a/Cd36/Hgf/Cyp1b1/Heg1/Ccr2/Xcl1/Rtn4/Hif1a/Gprc5b/Ccbe1/Ptprc/Calca/Abl1/Prkd2/Ccl2/Ccr5/Cd83	19
GO:0070925	BP	GO:0070925	organelle assembly	29/512	916/28943	0.00201399	0.0138842	0.00876468	Racgap1/Fez1/Cdc14a/Cenpc1/Synpo/Slitrk3/Ablim1/Synpo2/Stard9/Pdgfra/Msn/Lrrc49/Tnks/Npm1/Dzip1/Rdx/Meig1/Tmod2/Mef2a/Zfp423/Farp2/Ntng2/Hps3/Fbf1/Pogz/Tpx2/Fscn1/Shank3/Ubap2l	29
GO:0051781	BP	GO:0051781	positive regulation of cell division	7/512	100/28943	0.00202374	0.0139358	0.00879722	Racgap1/Ect2/Pdgfd/Cdc14a/Ptn/Tgfb2/Spast	7
GO:0008038	BP	GO:0008038	neuron recognition	5/512	51/28943	0.0020422	0.0140154	0.0088475	Wnt5a/Ccdc141/Rtn4/Sema5a/Efnb3	5
GO:0022602	BP	GO:0022602	ovulation cycle process	5/512	51/28943	0.0020422	0.0140154	0.0088475	Arrb1/Pdgfra/Fzd4/Adamts1/Ptx3	5
GO:0051646	BP	GO:0051646	mitochondrion localization	5/512	51/28943	0.0020422	0.0140154	0.0088475	Fez1/Hif1a/Zbed3/Mef2a/Spast	5
GO:0001659	BP	GO:0001659	temperature homeostasis	10/512	189/28943	0.00207446	0.0142209	0.00897721	Rbpj/Cd36/Grb10/Ccr2/Zfp516/Ednrb/Abat/Zfp423/Ccr5/Acot11	10
GO:0006688	BP	GO:0006688	glycosphingolipid biosynthetic process	4/512	31/28943	0.00208518	0.0142784	0.00901349	St8sia4/St3gal1/B4galt6/St6galnac4	4
GO:0032504	BP	GO:0032504	multicellular organism reproduction	30/512	962/28943	0.00212616	0.0144728	0.00913624	Racgap1/Fst/Clock/Spink1/Ptn/Prdm1/Jam2/Arrb1/Abcg2/Spire1/Scmh1/Tex15/Igf1/Ednrb/Abat/Pdgfra/Cxcl12/Pcyt1b/Fzd4/Zmiz1/Adamts1/Dzip1/Meig1/Calca/Ptx3/Tcf23/Rgs2/Gamt/Ace/Lif	30
GO:0010820	BP	GO:0010820	positive regulation of T cell chemotaxis	3/512	15/28943	0.00213707	0.0144728	0.00913624	Wnt5a/Ccr2/Xcl1	3
GO:0043455	BP	GO:0043455	regulation of secondary metabolic process	3/512	15/28943	0.00213707	0.0144728	0.00913624	Wnt5a/Zeb2/Atp7a	3
GO:0048021	BP	GO:0048021	regulation of melanin biosynthetic process	3/512	15/28943	0.00213707	0.0144728	0.00913624	Wnt5a/Zeb2/Atp7a	3
GO:0051782	BP	GO:0051782	negative regulation of cell division	3/512	15/28943	0.00213707	0.0144728	0.00913624	Ptch1/Myc/Orc6	3
GO:0090178	BP	GO:0090178	regulation of establishment of planar polarity involved in neural tube closure	3/512	15/28943	0.00213707	0.0144728	0.00913624	Wnt5a/Fzd1/Sfrp2	3
GO:1900376	BP	GO:1900376	regulation of secondary metabolite biosynthetic process	3/512	15/28943	0.00213707	0.0144728	0.00913624	Wnt5a/Zeb2/Atp7a	3
GO:1903238	BP	GO:1903238	positive regulation of leukocyte tethering or rolling	3/512	15/28943	0.00213707	0.0144728	0.00913624	Selp/Ccr2/Chst2	3
GO:1901615	BP	GO:1901615	organic hydroxy compound metabolic process	20/512	551/28943	0.00214147	0.0144728	0.00913624	Wnt5a/Cyp26a1/Sptlc3/Dab2/Cyp1b1/Zeb2/Hif1a/Atp7a/Ednrb/Abat/Myof/Tsku/Maoa/Lipa/Abca5/Sult1d1/Snai2/Maob/Pth1r/Tgfb2	20
GO:0042476	BP	GO:0042476	odontogenesis	8/512	129/28943	0.00214167	0.0144728	0.00913624	Fst/Gli3/Apcdd1/Osr1/Lef1/Pdgfra/Osr2/Wnt6	8
GO:0046632	BP	GO:0046632	alpha-beta T cell differentiation	8/512	129/28943	0.00214167	0.0144728	0.00913624	Gli3/Prdm1/Ccr2/Lef1/Satb1/Atp7a/Abl1/Cd83	8
GO:0032147	BP	GO:0032147	activation of protein kinase activity	7/512	101/28943	0.00214202	0.0144728	0.00913624	Ect2/Wnt5a/Igf1/Calca/Abl1/Tgfb2/Tpx2	7
GO:0010934	BP	GO:0010934	macrophage cytokine production	5/512	52/28943	0.00222711	0.0150311	0.00948868	Wnt5a/Cd36/Rtn4/Gprc5b/Tgfb2	5
GO:0043406	BP	GO:0043406	positive regulation of MAP kinase activity	8/512	130/28943	0.00224763	0.0151529	0.00956557	Edn3/Wnt5a/Egfr/Pdgfd/Zeb2/Ptprc/Fzd4/Dab2ip	8
GO:0150115	BP	GO:0150115	cell-substrate junction organization	7/512	102/28943	0.00226556	0.0152569	0.00963121	Lamc1/Dlc1/Macf1/Abl1/Slk/Fn1/Ppm1f	7
GO:0001893	BP	GO:0001893	maternal placenta development	4/512	32/28943	0.00235013	0.0157743	0.00995783	Ptn/Prdm1/Tcf23/Lif	4
GO:0030204	BP	GO:0030204	chondroitin sulfate metabolic process	4/512	32/28943	0.00235013	0.0157743	0.00995783	Mamdc2/Egflam/Spock2/Arsb	4
GO:0070670	BP	GO:0070670	response to interleukin-4	4/512	32/28943	0.00235013	0.0157743	0.00995783	Nfil3/Xcl1/Lef1/Mrc1	4
GO:0090150	BP	GO:0090150	establishment of protein localization to membrane	12/512	259/28943	0.00238324	0.0159789	0.010087	Pard3/Ank3/Macf1/Tcaf1/Pkdcc/Aqp11/Tcaf2/Tram2/Clstn1/C2cd5/Zdhhc2/Ccl2	12
GO:0015850	BP	GO:0015850	organic hydroxy compound transport	13/512	294/28943	0.00240643	0.0161167	0.010174	Gramd1b/Dab2/Cd36/Rtn4/Abat/Cxcl12/Tsku/Abca5/Ptch1/Maob/Myc/Syt15/Slc6a2	13
GO:0050821	BP	GO:0050821	protein stabilization	10/512	193/28943	0.00241624	0.0161647	0.0102043	Pfn2/Cdc37l1/Rtn4/Tbl1x/Igf1/Apbb2/Npm1/Zbed3/Usp2/Atp1b1	10
GO:0006687	BP	GO:0006687	glycosphingolipid metabolic process	5/512	53/28943	0.00242391	0.0161806	0.0102143	Itgb8/St8sia4/St3gal1/B4galt6/St6galnac4	5
GO:0061756	BP	GO:0061756	leukocyte adhesion to vascular endothelial cell	5/512	53/28943	0.00242391	0.0161806	0.0102143	Selp/Ccr2/Jam2/Cxcl12/Chst2	5
GO:0033673	BP	GO:0033673	negative regulation of kinase activity	11/512	226/28943	0.00244278	0.0162887	0.0102826	Heg1/Cbl/Ptprc/Adar/Ppm1e/Npm1/Sfrp2/Abl1/Rgs2/Dab2ip/Ppm1f	11
GO:0007224	BP	GO:0007224	smoothened signaling pathway	9/512	162/28943	0.0024623	0.016401	0.0103534	Gli3/Evc2/Gpc3/Nog/Dzip1/Ptch1/Zfp423/Sufu/Gpr161	9
GO:0001776	BP	GO:0001776	leukocyte homeostasis	8/512	132/28943	0.00247188	0.0164246	0.0103684	Ccr2/Hif1a/Tsc22d3/Lmo1/Lipa/Abl1/Tgfb2/Ccl2	8
GO:0016570	BP	GO:0016570	histone modification	18/512	480/28943	0.00247828	0.0164246	0.0103684	Hopx/Prdm1/Rps6ka5/Arrb1/Lef1/Kat6a/Satb1/Tbl1x/Brd4/Zfp451/Snai2/Kat6b/Zmpste24/Prkd2/Rrp8/Per1/Aplnr/Lif	18
GO:0008544	BP	GO:0008544	epidermis development	15/512	367/28943	0.00247929	0.0164246	0.0103684	Wnt5a/Lamc1/Rbpj/Fst/Egfr/Palld/Apcdd1/Satb1/Alg10b/Slc4a7/Atp7a/Sfrp4/Ptch1/Zmpste24/Tgfb2	15
GO:0050727	BP	GO:0050727	regulation of inflammatory response	15/512	367/28943	0.00247929	0.0164246	0.0103684	Wnt5a/Nkg7/Hgf/Clock/Pde2a/Ccr2/Xcl1/Gprc5b/Mfhas1/Igf1/Ednrb/Brd4/Cdh5/Ace/Ccr5	15
GO:0051604	BP	GO:0051604	protein maturation	15/512	367/28943	0.00247929	0.0164246	0.0103684	Gli3/Mme/Adam19/Asph/Ccbe1/Pcsk5/Cpxm2/Spon1/Fam111a/Ptch1/Nkd2/Zmpste24/Myc/Fn1/Ddi2	15
GO:0010001	BP	GO:0010001	glial cell differentiation	12/512	261/28943	0.00253804	0.0167956	0.0106025	Gli3/Pard3/Ptn/Vim/Rtn4/Lef1/Wasf3/Igf1/Nog/Abl1/B4galt6/Lif	12
GO:0051924	BP	GO:0051924	regulation of calcium ion transport	13/512	296/28943	0.00255125	0.0168647	0.0106462	Cacna2d1/Spink1/Asph/Igf1/Cxcl12/Calca/Abl1/Tgfb2/Ccl2/Ace/Usp2/Atp1b1/Aplnr	13
GO:0045931	BP	GO:0045931	positive regulation of mitotic cell cycle	8/512	133/28943	0.00259038	0.0170127	0.0107396	Pbx1/Egfr/Ccnd2/Brd4/Adamts1/Rdx/Abl1/Usp2	8
GO:0010715	BP	GO:0010715	regulation of extracellular matrix disassembly	3/512	16/28943	0.00259591	0.0170127	0.0107396	Sema5a/Tgfb2/Fscn1	3
GO:0010819	BP	GO:0010819	regulation of T cell chemotaxis	3/512	16/28943	0.00259591	0.0170127	0.0107396	Wnt5a/Ccr2/Xcl1	3
GO:0016264	BP	GO:0016264	gap junction assembly	3/512	16/28943	0.00259591	0.0170127	0.0107396	Hopx/Ace/Aplnr	3
GO:0021859	BP	GO:0021859	pyramidal neuron differentiation	3/512	16/28943	0.00259591	0.0170127	0.0107396	Dclk2/Atp7a/Zmiz1	3
GO:0031650	BP	GO:0031650	regulation of heat generation	3/512	16/28943	0.00259591	0.0170127	0.0107396	Ednrb/Abat/Ccr5	3
GO:0043951	BP	GO:0043951	negative regulation of cAMP-mediated signaling	3/512	16/28943	0.00259591	0.0170127	0.0107396	Pde2a/Rnf157/Aplnr	3
GO:0072498	BP	GO:0072498	embryonic skeletal joint development	3/512	16/28943	0.00259591	0.0170127	0.0107396	Osr1/Osr2/Nog	3
GO:0030595	BP	GO:0030595	leukocyte chemotaxis	11/512	228/28943	0.00261443	0.0171157	0.0108046	Edn3/Vav3/Wnt5a/Ptn/Ccr2/Xcl1/Camk1d/Ednrb/Cxcl12/Calca/Ccl2	11
GO:0051348	BP	GO:0051348	negative regulation of transferase activity	12/512	262/28943	0.00261845	0.017119	0.0108067	Heg1/Cbl/Ptprc/Adar/Ppm1e/Npm1/Sfrp2/Abl1/Rgs2/Dab2ip/Ppm1f/Mad2l2	12
GO:0038066	BP	GO:0038066	p38MAPK cascade	5/512	54/28943	0.00263304	0.017119	0.0108067	Hgf/Ccr2/Mfhas1/Dab2ip/Per1	5
GO:0048247	BP	GO:0048247	lymphocyte chemotaxis	5/512	54/28943	0.00263304	0.017119	0.0108067	Wnt5a/Ccr2/Xcl1/Cxcl12/Ccl2	5
GO:2000351	BP	GO:2000351	regulation of endothelial cell apoptotic process	5/512	54/28943	0.00263304	0.017119	0.0108067	Col18a1/Sema5a/Abl1/Cdh5/Ccl2	5
GO:0021904	BP	GO:0021904	dorsal/ventral neural tube patterning	4/512	33/28943	0.00263736	0.017119	0.0108067	Gli3/Ptch1/Sufu/Gpr161	4
GO:0021952	BP	GO:0021952	central nervous system projection neuron axonogenesis	4/512	33/28943	0.00263736	0.017119	0.0108067	Cdh11/Dclk1/Zeb2/Tsku	4
GO:0048566	BP	GO:0048566	embryonic digestive tract development	4/512	33/28943	0.00263736	0.017119	0.0108067	Gli3/Pkdcc/Pcsk5/Pdgfra	4
GO:0061037	BP	GO:0061037	negative regulation of cartilage development	4/512	33/28943	0.00263736	0.017119	0.0108067	Gli3/Nog/Snai2/Tgfb2	4
GO:0019722	BP	GO:0019722	calcium-mediated signaling	10/512	196/28943	0.0027011	0.0175141	0.0110561	Selp/Ccr2/Igf1/Ednrb/Atp2b4/Ptprc/Tmem100/Zmpste24/Ccr5/Atp1b1	10
GO:0009896	BP	GO:0009896	positive regulation of catabolic process	19/512	523/28943	0.00270757	0.0175375	0.0110709	Zbtb20/Wnt5a/Dab2/Tiparp/Vps13d/Prickle1/Hif1a/Igf1/Msn/Gpc3/Prr5l/Ankib1/Rnft2/Rdx/Nkd2/Myc/Dab2ip/Ago2/Samd4	19
GO:1903037	BP	GO:1903037	regulation of leukocyte cell-cell adhesion	15/512	371/28943	0.0027461	0.0177682	0.0112165	Has2/Gli3/Selp/Ccr2/Smarca2/Xcl1/Lef1/Igf1/Ptprc/Cxcl12/Chst2/Zmiz1/Ccl2/Efnb3/Cd83	15
GO:0021766	BP	GO:0021766	hippocampus development	6/512	79/28943	0.00278235	0.0179837	0.0113525	Gli3/Zeb2/Zbtb18/Dclk2/Lef1/Tsku	6
GO:0007249	BP	GO:0007249	I-kappaB kinase/NF-kappaB signaling	11/512	230/28943	0.00279571	0.0180509	0.011395	Wnt5a/Cd36/Eda2r/Erc1/Gprc5b/Ednrb/Brd4/Abl1/Dab2ip/Per1/Cpne1	11
GO:0043405	BP	GO:0043405	regulation of MAP kinase activity	10/512	198/28943	0.00290548	0.0187399	0.0118299	Edn3/Wnt5a/Egfr/Pdgfd/Zeb2/Ptprc/Fzd4/Sfrp2/Rgs2/Dab2ip	10
GO:0002092	BP	GO:0002092	positive regulation of receptor internalization	4/512	34/28943	0.00294775	0.0189925	0.0119893	Dab2/Pard3/Arrb1/Sfrp4	4
GO:0043065	BP	GO:0043065	positive regulation of apoptotic process	21/512	607/28943	0.00295848	0.0190225	0.0120083	Ect2/Wnt5a/Col18a1/Cyp1b1/Dlc1/Ptn/Arrb1/Camk1d/Hif1a/Ptprc/Apbb2/Sfrp4/Scin/Sfrp2/Abl1/Slk/Myc/Dab2ip/Tgfb2/Ccl2/Ace	21
GO:0070167	BP	GO:0070167	regulation of biomineral tissue development	7/512	107/28943	0.00296775	0.0190225	0.0120083	Ptn/Osr1/Hif1a/Pkdcc/Osr2/Zmpste24/Wnt6	7
GO:0048545	BP	GO:0048545	response to steroid hormone	11/512	232/28943	0.00298698	0.0190225	0.0120083	Dab2/Clock/Ube3a/Ddx17/Tbl1x/Rbfox2/Igf1/Areg/Zmiz1/Tgfb2/Per1	11
GO:0003150	BP	GO:0003150	muscular septum morphogenesis	2/512	5/28943	0.0030147	0.0190225	0.0120083	Tgfbr3/Fzd1	2
GO:0003383	BP	GO:0003383	apical constriction	2/512	5/28943	0.0030147	0.0190225	0.0120083	Frmd6/Pard3	2
GO:0007494	BP	GO:0007494	midgut development	2/512	5/28943	0.0030147	0.0190225	0.0120083	Wnt5a/Ednrb	2
GO:0009957	BP	GO:0009957	epidermal cell fate specification	2/512	5/28943	0.0030147	0.0190225	0.0120083	Rbpj/Ptch1	2
GO:0022009	BP	GO:0022009	central nervous system vasculogenesis	2/512	5/28943	0.0030147	0.0190225	0.0120083	Rtn4/Eng	2
GO:0035426	BP	GO:0035426	extracellular matrix-cell signaling	2/512	5/28943	0.0030147	0.0190225	0.0120083	Ndp/Fzd4	2
GO:0036022	BP	GO:0036022	limb joint morphogenesis	2/512	5/28943	0.0030147	0.0190225	0.0120083	Osr1/Osr2	2
GO:0048818	BP	GO:0048818	positive regulation of hair follicle maturation	2/512	5/28943	0.0030147	0.0190225	0.0120083	Wnt5a/Tgfb2	2
GO:0060708	BP	GO:0060708	spongiotrophoblast differentiation	2/512	5/28943	0.0030147	0.0190225	0.0120083	Xist/Lif	2
GO:0060750	BP	GO:0060750	epithelial cell proliferation involved in mammary gland duct elongation	2/512	5/28943	0.0030147	0.0190225	0.0120083	Wnt5a/Areg	2
GO:0061304	BP	GO:0061304	retinal blood vessel morphogenesis	2/512	5/28943	0.0030147	0.0190225	0.0120083	Cyp1b1/Fzd4	2
GO:0071593	BP	GO:0071593	lymphocyte aggregation	2/512	5/28943	0.0030147	0.0190225	0.0120083	Jam2/Msn	2
GO:1901529	BP	GO:1901529	positive regulation of anion channel activity	2/512	5/28943	0.0030147	0.0190225	0.0120083	Tcaf1/Abcb1b	2
GO:1903391	BP	GO:1903391	regulation of adherens junction organization	2/512	5/28943	0.0030147	0.0190225	0.0120083	Add1/Rdx	2
GO:1905007	BP	GO:1905007	positive regulation of epithelial to mesenchymal transition involved in endocardial cushion formation	2/512	5/28943	0.0030147	0.0190225	0.0120083	Eng/Tgfb2	2
GO:2000410	BP	GO:2000410	regulation of thymocyte migration	2/512	5/28943	0.0030147	0.0190225	0.0120083	Ccr2/Xcl1	2
GO:2000437	BP	GO:2000437	regulation of monocyte extravasation	2/512	5/28943	0.0030147	0.0190225	0.0120083	Pdgfd/Ccr2	2
GO:0010942	BP	GO:0010942	positive regulation of cell death	23/512	690/28943	0.00304301	0.0191813	0.0121086	Ect2/Wnt5a/Cd36/Col18a1/Cyp1b1/Dlc1/Ptn/Arrb1/Camk1d/Hif1a/Ptprc/Apbb2/Sfrp4/Scin/Sfrp2/Abl1/Slk/Myc/Dab2ip/Tgfb2/Ccl2/Ace/Slc6a6	23
GO:0044772	BP	GO:0044772	mitotic cell cycle phase transition	17/512	451/28943	0.00306144	0.0192776	0.0121693	Pbx1/Egfr/Ppp2r5c/Smc5/Cdc14a/Foxn3/Smarca2/Ccnd2/Fbxl3/Brd4/Adamts1/Hus1/Rdx/Myc/Ccl2/Abcb1b/Spast	17
GO:0061001	BP	GO:0061001	regulation of dendritic spine morphogenesis	5/512	56/28943	0.00309005	0.0193902	0.0122404	Ube3a/Ppfia2/Caprin2/Abi2/Shank3	5
GO:0070169	BP	GO:0070169	positive regulation of biomineral tissue development	5/512	56/28943	0.00309005	0.0193902	0.0122404	Ptn/Osr1/Pkdcc/Osr2/Wnt6	5
GO:1900271	BP	GO:1900271	regulation of long-term synaptic potentiation	5/512	56/28943	0.00309005	0.0193902	0.0122404	Mme/Ptn/Abl1/Zdhhc2/Shank3	5
GO:0055076	BP	GO:0055076	transition metal ion homeostasis	8/512	137/28943	0.00310942	0.0193902	0.0122404	Steap4/Cp/Hif1a/Scara5/Atp7a/Heph/Slc30a4/Myc	8
GO:0017014	BP	GO:0017014	protein nitrosylation	3/512	17/28943	0.00311107	0.0193902	0.0122404	Atp2b4/Ddah1/Ace	3
GO:0019896	BP	GO:0019896	axonal transport of mitochondrion	3/512	17/28943	0.00311107	0.0193902	0.0122404	Fez1/Hif1a/Spast	3
GO:0051127	BP	GO:0051127	positive regulation of actin nucleation	3/512	17/28943	0.00311107	0.0193902	0.0122404	Abi2/Wasf3/Scin	3
GO:1902033	BP	GO:1902033	regulation of hematopoietic stem cell proliferation	3/512	17/28943	0.00311107	0.0193902	0.0122404	Wnt5a/Snai2/Ace	3
GO:1903019	BP	GO:1903019	negative regulation of glycoprotein metabolic process	3/512	17/28943	0.00311107	0.0193902	0.0122404	Itm2a/Ptx3/Ago2	3
GO:2001028	BP	GO:2001028	positive regulation of endothelial cell chemotaxis	3/512	17/28943	0.00311107	0.0193902	0.0122404	Sema5a/Snai2/Prkd2	3
GO:0007405	BP	GO:0007405	neuroblast proliferation	6/512	81/28943	0.00315421	0.019619	0.0123849	Racgap1/Gli3/Ptn/Hif1a/Lef1/Eml1	6
GO:0051145	BP	GO:0051145	smooth muscle cell differentiation	6/512	81/28943	0.00315421	0.019619	0.0123849	Smarca2/Tshz3/Zeb1/Ednrb/Eng/Aplnr	6
GO:0008277	BP	GO:0008277	regulation of G protein-coupled receptor signaling pathway	8/512	138/28943	0.00325101	0.0201595	0.0127261	Arrb1/Atp2b4/Calca/Tmod2/Rgs2/Rnf157/Aplnr/Kctd12	8
GO:0017015	BP	GO:0017015	regulation of transforming growth factor beta receptor signaling pathway	8/512	138/28943	0.00325101	0.0201595	0.0127261	Dab2/Tgfbr3/Zeb2/Zeb1/Tsku/Zfyve9/Zfp451/Eng	8
GO:0032874	BP	GO:0032874	positive regulation of stress-activated MAPK cascade	8/512	138/28943	0.00325101	0.0201595	0.0127261	Wnt5a/Dab2/Mid1/Eda2r/Ccr2/Mfhas1/Dab2ip/Tgfb2	8
GO:0050863	BP	GO:0050863	regulation of T cell activation	15/512	378/28943	0.00326994	0.020223	0.0127661	Gli3/Prdm1/Ccr2/Smarca2/Xcl1/Lef1/Zeb1/Igf1/Ptprc/Lmo1/Zmiz1/Abl1/Ccl2/Efnb3/Cd83	15
GO:0035116	BP	GO:0035116	embryonic hindlimb morphogenesis	4/512	35/28943	0.0032822	0.020223	0.0127661	Aff3/Osr1/Osr2/Gpc3	4
GO:1904994	BP	GO:1904994	regulation of leukocyte adhesion to vascular endothelial cell	4/512	35/28943	0.0032822	0.020223	0.0127661	Selp/Ccr2/Cxcl12/Chst2	4
GO:2000406	BP	GO:2000406	positive regulation of T cell migration	4/512	35/28943	0.0032822	0.020223	0.0127661	Wnt5a/Ccr2/Xcl1/Cxcl12	4
GO:0033555	BP	GO:0033555	multicellular organismal response to stress	7/512	109/28943	0.00329103	0.020223	0.0127661	Penk/Spire1/Ednrb/Kcnip3/Calca/Slc6a2/Shank3	7
GO:0042310	BP	GO:0042310	vasoconstriction	7/512	109/28943	0.00329103	0.020223	0.0127661	Edn3/Add3/Cd38/Hif1a/Ednrb/Abl1/Ace	7
GO:0070227	BP	GO:0070227	lymphocyte apoptotic process	7/512	109/28943	0.00329103	0.020223	0.0127661	Wnt5a/Gli3/Hif1a/Tsc22d3/St3gal1/Myc/Tgfb2	7
GO:0072676	BP	GO:0072676	lymphocyte migration	7/512	109/28943	0.00329103	0.020223	0.0127661	Wnt5a/Ccr2/Jam2/Xcl1/Msn/Cxcl12/Ccl2	7
GO:0110149	BP	GO:0110149	regulation of biomineralization	7/512	109/28943	0.00329103	0.020223	0.0127661	Ptn/Osr1/Hif1a/Pkdcc/Osr2/Zmpste24/Wnt6	7
GO:0031646	BP	GO:0031646	positive regulation of nervous system process	5/512	57/28943	0.0033388	0.020373	0.0128608	Hgf/Pard3/Wasf3/Igf1/Abat	5
GO:0032964	BP	GO:0032964	collagen biosynthetic process	5/512	57/28943	0.0033388	0.020373	0.0128608	Suco/Vim/Tram2/Fn1/Ccl2	5
GO:0043536	BP	GO:0043536	positive regulation of blood vessel endothelial cell migration	5/512	57/28943	0.0033388	0.020373	0.0128608	Col18a1/Hif1a/Igf1/Abl1/Prkd2	5
GO:0050732	BP	GO:0050732	negative regulation of peptidyl-tyrosine phosphorylation	5/512	57/28943	0.0033388	0.020373	0.0128608	Spink1/Cbl/Igf1/Ptprc/Sfrp2	5
GO:0072577	BP	GO:0072577	endothelial cell apoptotic process	5/512	57/28943	0.0033388	0.020373	0.0128608	Col18a1/Sema5a/Abl1/Cdh5/Ccl2	5
GO:0110151	BP	GO:0110151	positive regulation of biomineralization	5/512	57/28943	0.0033388	0.020373	0.0128608	Ptn/Osr1/Pkdcc/Osr2/Wnt6	5
GO:1903533	BP	GO:1903533	regulation of protein targeting	5/512	57/28943	0.0033388	0.020373	0.0128608	Ank3/Tcaf1/Tcaf2/C2cd5/Ccl2	5
GO:0031056	BP	GO:0031056	regulation of histone modification	10/512	202/28943	0.00335125	0.0204286	0.0128959	Rps6ka5/Arrb1/Brd4/Zfp451/Snai2/Zmpste24/Prkd2/Rrp8/Aplnr/Lif	10
GO:0043433	BP	GO:0043433	negative regulation of DNA-binding transcription factor activity	9/512	170/28943	0.00339696	0.0206866	0.0130588	Pbx1/Cyp1b1/Arrb1/Kat6a/Sfrp4/Ptch1/Dab2ip/Sufu/Mad2l2	9
GO:0046916	BP	GO:0046916	cellular transition metal ion homeostasis	7/512	110/28943	0.00346241	0.0210432	0.0132839	Steap4/Hif1a/Scara5/Atp7a/Heph/Slc30a4/Myc	7
GO:0055006	BP	GO:0055006	cardiac cell development	7/512	110/28943	0.00346241	0.0210432	0.0132839	Col14a1/Tgfbr3/Igf1/Pdgfra/Zmpste24/Mef2a/Rgs2	7
GO:0070304	BP	GO:0070304	positive regulation of stress-activated protein kinase signaling cascade	8/512	140/28943	0.00354916	0.021549	0.0136032	Wnt5a/Dab2/Mid1/Eda2r/Ccr2/Mfhas1/Dab2ip/Tgfb2	8
GO:1904888	BP	GO:1904888	cranial skeletal system development	6/512	83/28943	0.00356192	0.0215836	0.013625	Gli3/Ric1/Foxn3/Pdgfra/Nog/Tgfb2	6
GO:2000756	BP	GO:2000756	regulation of peptidyl-lysine acetylation	6/512	83/28943	0.00356192	0.0215836	0.013625	Rps6ka5/Arrb1/Zfp451/Snai2/Zmpste24/Lif	6
GO:0006826	BP	GO:0006826	iron ion transport	5/512	58/28943	0.00360162	0.0217809	0.0137496	Steap4/Cp/Scara5/Atp7a/Heph	5
GO:0051496	BP	GO:0051496	positive regulation of stress fiber assembly	5/512	58/28943	0.00360162	0.0217809	0.0137496	Pfn2/Ppm1e/Abl1/Ppm1f/Sorbs3	5
GO:0043068	BP	GO:0043068	positive regulation of programmed cell death	21/512	618/28943	0.00363621	0.0219356	0.0138473	Ect2/Wnt5a/Col18a1/Cyp1b1/Dlc1/Ptn/Arrb1/Camk1d/Hif1a/Ptprc/Apbb2/Sfrp4/Scin/Sfrp2/Abl1/Slk/Myc/Dab2ip/Tgfb2/Ccl2/Ace	21
GO:0032760	BP	GO:0032760	positive regulation of tumor necrosis factor production	7/512	111/28943	0.00364051	0.0219356	0.0138473	Zbtb20/Wnt5a/Cd36/Ccr2/Ptprc/Ccl2/Ccr5	7
GO:0031069	BP	GO:0031069	hair follicle morphogenesis	4/512	36/28943	0.00364157	0.0219356	0.0138473	Lamc1/Fst/Atp7a/Tgfb2	4
GO:1903715	BP	GO:1903715	regulation of aerobic respiration	4/512	36/28943	0.00364157	0.0219356	0.0138473	Pde2a/Hif1a/Atp7a/Myc	4
GO:0062013	BP	GO:0062013	positive regulation of small molecule metabolic process	9/512	172/28943	0.00366933	0.0220811	0.0139391	Zbtb20/Dab2/Cd36/Pid1/Lpgat1/Hif1a/Igf1/Myc/Pth1r	9
GO:0010470	BP	GO:0010470	regulation of gastrulation	3/512	18/28943	0.00368464	0.0220862	0.0139423	Osr1/Osr2/Poglut1	3
GO:0070486	BP	GO:0070486	leukocyte aggregation	3/512	18/28943	0.00368464	0.0220862	0.0139423	Has2/Jam2/Msn	3
GO:0140131	BP	GO:0140131	positive regulation of lymphocyte chemotaxis	3/512	18/28943	0.00368464	0.0220862	0.0139423	Wnt5a/Ccr2/Xcl1	3
GO:2000641	BP	GO:2000641	regulation of early endosome to late endosome transport	3/512	18/28943	0.00368464	0.0220862	0.0139423	Dab2/Msn/Rdx	3
GO:0019221	BP	GO:0019221	cytokine-mediated signaling pathway	16/512	421/28943	0.00369669	0.0221367	0.0139742	Jak1/Wnt5a/Eda2r/Rps6ka5/Ccr2/Xcl1/Slit3/Hif1a/Ptprc/Cxcl12/Adar/Il13ra2/Ccl2/Cpne1/Csf2rb2/Il15ra	16
GO:1903844	BP	GO:1903844	regulation of cellular response to transforming growth factor beta stimulus	8/512	141/28943	0.00370596	0.0221704	0.0139955	Dab2/Tgfbr3/Zeb2/Zeb1/Tsku/Zfyve9/Zfp451/Eng	8
GO:0042445	BP	GO:0042445	hormone metabolic process	11/512	239/28943	0.00374092	0.0223577	0.0141137	Cyp26a1/Dab2/Tiparp/Cyp1b1/Hif1a/Pcsk5/Igf1/Ednrb/Pdgfra/Zmpste24/Ace	11
GO:0034109	BP	GO:0034109	homotypic cell-cell adhesion	6/512	84/28943	0.00377986	0.0225463	0.0142328	Jak1/Ank3/Abat/Pdgfra/Rdx/Fn1	6
GO:1903510	BP	GO:1903510	mucopolysaccharide metabolic process	6/512	84/28943	0.00377986	0.0225463	0.0142328	Has2/Mamdc2/Egflam/Ednrb/Spock2/Arsb	6
GO:0006820	BP	GO:0006820	anion transport	18/512	500/28943	0.00380045	0.022647	0.0142963	Racgap1/Cd36/Slc43a2/Tcaf1/Abcg2/Slc4a7/Abat/Ano1/Tcaf2/Clcn5/Sfrp4/Slc2a3/Slc19a1/Myc/Rgs2/Ace/Abcb1b/Slc6a6	18
GO:0043616	BP	GO:0043616	keratinocyte proliferation	5/512	59/28943	0.00387896	0.0230923	0.0145774	Has2/Fst/Zeb1/Ptch1/Snai2	5
GO:0006886	BP	GO:0006886	intracellular protein transport	26/512	831/28943	0.0039233	0.0233335	0.0147297	Ect2/Dlg2/Gli3/Cd36/Ric1/Pard3/Ank3/Vps13d/Vps39/Macf1/Prickle1/Tcaf1/Xpo1/Asph/Aqp11/Tcaf2/Adar/Prr5l/Cacng4/Tram2/Kcnip3/C2cd5/Zdhhc2/Ccl2/Tnpo1/Sorcs2	26
GO:0006897	BP	GO:0006897	endocytosis	23/512	705/28943	0.00394775	0.0234561	0.0148071	Wnt5a/Elmo1/Dab2/Cd36/Ube3a/Pard3/Dennd1a/Add1/Arrb1/Colec12/Cbl/Scara5/Gpc3/Mrc1/Cacng4/Clcn5/Sfrp4/Calca/Ptx3/Abl1/Masp1/Srl/Ly75	23
GO:0009266	BP	GO:0009266	response to temperature stimulus	9/512	174/28943	0.00395854	0.0234912	0.0148292	Zfp516/Scara5/Igf1/Ano1/Myof/Cxcl12/Calca/Ccl2/Acot11	9
GO:0046777	BP	GO:0046777	protein autophosphorylation	11/512	241/28943	0.00398216	0.0234912	0.0148292	Egfr/Pdgfd/Pdgfra/Ptprc/Brd4/Abl1/Slk/Eng/Mark2/Prkd2/Ace	11
GO:0002700	BP	GO:0002700	regulation of production of molecular mediator of immune response	10/512	207/28943	0.0039831	0.0234912	0.0148292	Wnt5a/Cd36/Ccr2/Xcl1/Rtn4/Gprc5b/Ptprc/Il13ra2/Tgfb2/Mad2l2	10
GO:0043491	BP	GO:0043491	protein kinase B signaling	10/512	207/28943	0.0039831	0.0234912	0.0148292	Egfr/Rtn4/Mfhas1/Sema5a/Igf1/Cxcl12/Tmem100/Eng/Ccl2/Cpne1	10
GO:0031647	BP	GO:0031647	regulation of protein stability	13/512	312/28943	0.00398604	0.0234912	0.0148292	Pfn2/Cdc37l1/Rtn4/Asph/Tbl1x/Igf1/Fbxl3/Apbb2/Npm1/Zbed3/Ddi2/Usp2/Atp1b1	13
GO:0006809	BP	GO:0006809	nitric oxide biosynthetic process	6/512	85/28943	0.00400753	0.0234912	0.0148292	Cd36/Cyp1b1/Igf1/Atp2b4/Ddah1/Ptx3	6
GO:0014855	BP	GO:0014855	striated muscle cell proliferation	6/512	85/28943	0.00400753	0.0234912	0.0148292	Rbpj/Hgf/Tgfbr3/Ccnd2/Nog/Tgfb2	6
GO:0051966	BP	GO:0051966	regulation of synaptic transmission, glutamatergic	6/512	85/28943	0.00400753	0.0234912	0.0148292	Gria4/Ccr2/Tshz3/Cacng4/Ccl2/Shank3	6
GO:0070228	BP	GO:0070228	regulation of lymphocyte apoptotic process	6/512	85/28943	0.00400753	0.0234912	0.0148292	Wnt5a/Hif1a/Tsc22d3/St3gal1/Myc/Tgfb2	6
GO:1903557	BP	GO:1903557	positive regulation of tumor necrosis factor superfamily cytokine production	7/512	113/28943	0.0040175	0.0234912	0.0148292	Zbtb20/Wnt5a/Cd36/Ccr2/Ptprc/Ccl2/Ccr5	7
GO:0006884	BP	GO:0006884	cell volume homeostasis	4/512	37/28943	0.00402673	0.0234912	0.0148292	Add1/Aqp11/Npm1/Shank3	4
GO:0032506	BP	GO:0032506	cytokinetic process	4/512	37/28943	0.00402673	0.0234912	0.0148292	Racgap1/Ect2/Spire1/Spast	4
GO:0035909	BP	GO:0035909	aorta morphogenesis	4/512	37/28943	0.00402673	0.0234912	0.0148292	Rbpj/Kat6a/Eng/Tgfb2	4
GO:0046677	BP	GO:0046677	response to antibiotic	4/512	37/28943	0.00402673	0.0234912	0.0148292	Jak1/Hif1a/Cbl/Ciita	4
GO:0048846	BP	GO:0048846	axon extension involved in axon guidance	4/512	37/28943	0.00402673	0.0234912	0.0148292	Wnt5a/Slit3/Sema5a/Cxcl12	4
GO:0071711	BP	GO:0071711	basement membrane organization	4/512	37/28943	0.00402673	0.0234912	0.0148292	Lama2/Lamc1/Nid1/Ntng2	4
GO:0090279	BP	GO:0090279	regulation of calcium ion import	4/512	37/28943	0.00402673	0.0234912	0.0148292	Spink1/Cxcl12/Ccl2/Ace	4
GO:1902284	BP	GO:1902284	neuron projection extension involved in neuron projection guidance	4/512	37/28943	0.00402673	0.0234912	0.0148292	Wnt5a/Slit3/Sema5a/Cxcl12	4
GO:1904738	BP	GO:1904738	vascular associated smooth muscle cell migration	4/512	37/28943	0.00402673	0.0234912	0.0148292	Grb10/Pcsk5/Atp7a/Adamts1	4
GO:0034614	BP	GO:0034614	cellular response to reactive oxygen species	8/512	143/28943	0.00403558	0.0235204	0.0148477	Ect2/Egfr/Cd36/Hgf/Cyp1b1/Atp7a/Pdgfra/Abl1	8
GO:0099173	BP	GO:0099173	postsynapse organization	10/512	208/28943	0.00412008	0.0239899	0.0151441	Wnt5a/Ube3a/Ppfia2/Ptn/Caprin2/Slitrk3/Abi2/Zdhhc2/Ntng2/Shank3	10
GO:0002548	BP	GO:0002548	monocyte chemotaxis	5/512	60/28943	0.00417125	0.0242416	0.015303	Ccr2/Xcl1/Cxcl12/Calca/Ccl2	5
GO:0015872	BP	GO:0015872	dopamine transport	5/512	60/28943	0.00417125	0.0242416	0.015303	Rtn4/Abat/Cxcl12/Syt15/Slc6a2	5
GO:0000723	BP	GO:0000723	telomere maintenance	8/512	144/28943	0.00420865	0.0244358	0.0154255	Ino80d/Smc5/Hmbox1/Tnks/Hus1/Wrn/Myc/Mad2l2	8
GO:0007156	BP	GO:0007156	homophilic cell adhesion via plasma membrane adhesion molecules	7/512	114/28943	0.00421673	0.0244363	0.0154258	Tenm3/Cdh11/Ccdc141/Palld/Cdh10/Clstn1/Cdh5	7
GO:1903076	BP	GO:1903076	regulation of protein localization to plasma membrane	7/512	114/28943	0.00421673	0.0244363	0.0154258	Egfr/Dab2/Pid1/Pkdcc/Atp2b4/Zdhhc2/Nkd2	7
GO:0097529	BP	GO:0097529	myeloid leukocyte migration	11/512	243/28943	0.00423566	0.0245226	0.0154804	Edn3/Vav3/Pdgfd/Ccr2/Xcl1/Camk1d/Rtn4/Ednrb/Cxcl12/Calca/Ccl2	11
GO:0019229	BP	GO:0019229	regulation of vasoconstriction	6/512	86/28943	0.00424519	0.0245546	0.0155005	Edn3/Add3/Cd38/Hif1a/Abl1/Ace	6
GO:0033623	BP	GO:0033623	regulation of integrin activation	3/512	19/28943	0.00431856	0.0248612	0.0156941	Selp/Pcsk5/Farp2	3
GO:0051956	BP	GO:0051956	negative regulation of amino acid transport	3/512	19/28943	0.00431856	0.0248612	0.0156941	Slc43a2/Abat/Rgs2	3
GO:1901550	BP	GO:1901550	regulation of endothelial cell development	3/512	19/28943	0.00431856	0.0248612	0.0156941	Akap11/Add1/Cdh5	3
GO:1902430	BP	GO:1902430	negative regulation of amyloid-beta formation	3/512	19/28943	0.00431856	0.0248612	0.0156941	Rtn4/Igf1/Spon1	3
GO:1903140	BP	GO:1903140	regulation of establishment of endothelial barrier	3/512	19/28943	0.00431856	0.0248612	0.0156941	Akap11/Add1/Cdh5	3
GO:0007254	BP	GO:0007254	JNK cascade	9/512	177/28943	0.00442545	0.0251591	0.0158822	Wnt5a/Egfr/Dab2/Eda2r/Mfhas1/Sfrp4/Sfrp2/Dab2ip/Per1	9
GO:0009612	BP	GO:0009612	response to mechanical stimulus	9/512	177/28943	0.00442545	0.0251591	0.0158822	Cd36/Ptn/Col11a1/Pde2a/Piezo2/Igf1/Cxcl12/Myc/Shank3	9
GO:0051100	BP	GO:0051100	negative regulation of binding	9/512	177/28943	0.00442545	0.0251591	0.0158822	Map2/Dab2/Lef1/Nog/Tnks/Myc/Ace/Cpne1/Mad2l2	9
GO:1903580	BP	GO:1903580	positive regulation of ATP metabolic process	4/512	38/28943	0.0044385	0.0251591	0.0158822	Zbtb20/Pid1/Igf1/Myc	4
GO:1905606	BP	GO:1905606	regulation of presynapse assembly	4/512	38/28943	0.0044385	0.0251591	0.0158822	Gpc6/Slitrk3/Fzd1/Ntng2	4
GO:0000912	BP	GO:0000912	assembly of actomyosin apparatus involved in cytokinesis	2/512	6/28943	0.00446916	0.0251591	0.0158822	Racgap1/Ect2	2
GO:0000915	BP	GO:0000915	actomyosin contractile ring assembly	2/512	6/28943	0.00446916	0.0251591	0.0158822	Racgap1/Ect2	2
GO:0001922	BP	GO:0001922	B-1 B cell homeostasis	2/512	6/28943	0.00446916	0.0251591	0.0158822	Hif1a/Abl1	2
GO:0002434	BP	GO:0002434	immune complex clearance	2/512	6/28943	0.00446916	0.0251591	0.0158822	Ccr2/Ccl2	2
GO:0003402	BP	GO:0003402	planar cell polarity pathway involved in axis elongation	2/512	6/28943	0.00446916	0.0251591	0.0158822	Wnt5a/Sfrp2	2
GO:0010706	BP	GO:0010706	ganglioside biosynthetic process via lactosylceramide	2/512	6/28943	0.00446916	0.0251591	0.0158822	St3gal1/B4galt6	2
GO:0015677	BP	GO:0015677	copper ion import	2/512	6/28943	0.00446916	0.0251591	0.0158822	Steap4/Atp7a	2
GO:0035747	BP	GO:0035747	natural killer cell chemotaxis	2/512	6/28943	0.00446916	0.0251591	0.0158822	Xcl1/Ccl2	2
GO:0042695	BP	GO:0042695	thelarche	2/512	6/28943	0.00446916	0.0251591	0.0158822	Wnt5a/Areg	2
GO:0044837	BP	GO:0044837	actomyosin contractile ring organization	2/512	6/28943	0.00446916	0.0251591	0.0158822	Racgap1/Ect2	2
GO:0060744	BP	GO:0060744	mammary gland branching involved in thelarche	2/512	6/28943	0.00446916	0.0251591	0.0158822	Wnt5a/Areg	2
GO:0060751	BP	GO:0060751	branch elongation involved in mammary gland duct branching	2/512	6/28943	0.00446916	0.0251591	0.0158822	Wnt5a/Areg	2
GO:0060842	BP	GO:0060842	arterial endothelial cell differentiation	2/512	6/28943	0.00446916	0.0251591	0.0158822	Rbpj/Tmem100	2
GO:0061419	BP	GO:0061419	positive regulation of transcription from RNA polymerase II promoter in response to hypoxia	2/512	6/28943	0.00446916	0.0251591	0.0158822	Rbpj/Hif1a	2
GO:0072103	BP	GO:0072103	glomerulus vasculature morphogenesis	2/512	6/28943	0.00446916	0.0251591	0.0158822	Pdgfra/Notch3	2
GO:0072104	BP	GO:0072104	glomerular capillary formation	2/512	6/28943	0.00446916	0.0251591	0.0158822	Pdgfra/Notch3	2
GO:0150012	BP	GO:0150012	positive regulation of neuron projection arborization	2/512	6/28943	0.00446916	0.0251591	0.0158822	Wnt5a/Fzd4	2
GO:2000323	BP	GO:2000323	negative regulation of glucocorticoid receptor signaling pathway	2/512	6/28943	0.00446916	0.0251591	0.0158822	Clock/Per1	2
GO:2000501	BP	GO:2000501	regulation of natural killer cell chemotaxis	2/512	6/28943	0.00446916	0.0251591	0.0158822	Xcl1/Ccl2	2
GO:0008202	BP	GO:0008202	steroid metabolic process	14/512	354/28943	0.00454131	0.0255417	0.0161237	Cyp26a1/Pbx1/Dab2/Tiparp/Cyp1b1/Cyp3a57/Igf1/Ednrb/Pdgfra/Tsku/Lipa/Abca5/Cyp3a59/Snai2	14
GO:0006936	BP	GO:0006936	muscle contraction	13/512	317/28943	0.00454884	0.0255606	0.0161356	Edn3/Cacna2d1/Cd38/Tshz3/Ednrb/Abat/Atp2b4/Apbb2/Calca/Tmod2/Rgs2/Synm/Atp1b1	13
GO:0010721	BP	GO:0010721	negative regulation of cell development	10/512	211/28943	0.00455346	0.025563	0.0161371	Map2/Wnt5a/Ptn/Rtn4/Sema5a/Igf1/Ednrb/Nog/Ccr5/Efnb3	10
GO:0030833	BP	GO:0030833	regulation of actin filament polymerization	8/512	146/28943	0.00457187	0.0256428	0.0161875	Pfn2/Add3/Add1/Kirrel/Rdx/Tmod2/Scin/Kank4	8
GO:0023061	BP	GO:0023061	signal release	20/512	590/28943	0.00459713	0.0257608	0.016262	Edn3/Pfn2/Dab2/Clock/Ppfia2/Lin7a/Nrn1/Cd38/Erc1/Arrb1/Rtn4/Hif1a/Ednrb/Abat/Ano1/Cxcl12/Fzd4/Maob/Syt15/Lif	20
GO:0036293	BP	GO:0036293	response to decreased oxygen levels	11/512	246/28943	0.00463981	0.0259524	0.0163829	Kcnd2/Rbpj/Cd38/Rtn4/Hif1a/Abat/Ddah1/Eng/Myc/Tgfb2/Atp1b1	11
GO:0050870	BP	GO:0050870	positive regulation of T cell activation	11/512	246/28943	0.00463981	0.0259524	0.0163829	Gli3/Ccr2/Smarca2/Xcl1/Lef1/Igf1/Ptprc/Zmiz1/Ccl2/Efnb3/Cd83	11
GO:0030500	BP	GO:0030500	regulation of bone mineralization	6/512	88/28943	0.0047515	0.0265528	0.0167619	Ptn/Osr1/Hif1a/Pkdcc/Osr2/Zmpste24	6
GO:0030858	BP	GO:0030858	positive regulation of epithelial cell differentiation	5/512	62/28943	0.00480239	0.0267149	0.0168643	Zeb2/Tmem100/Sfrp4/Ptch1/Lif	5
GO:0031102	BP	GO:0031102	neuron projection regeneration	5/512	62/28943	0.00480239	0.0267149	0.0168643	Hgf/Ptn/Rtn4/Mtr/Matn2	5
GO:0045778	BP	GO:0045778	positive regulation of ossification	5/512	62/28943	0.00480239	0.0267149	0.0168643	Wnt5a/Ptn/Osr1/Pkdcc/Osr2	5
GO:0048260	BP	GO:0048260	positive regulation of receptor-mediated endocytosis	5/512	62/28943	0.00480239	0.0267149	0.0168643	Dab2/Pard3/Arrb1/Cbl/Sfrp4	5
GO:0050982	BP	GO:0050982	detection of mechanical stimulus	5/512	62/28943	0.00480239	0.0267149	0.0168643	Col11a1/Piezo2/Igf1/Cxcl12/Myc	5
GO:0044070	BP	GO:0044070	regulation of anion transport	7/512	117/28943	0.00485943	0.026962	0.0170203	Slc43a2/Tcaf1/Abat/Tcaf2/Sfrp4/Rgs2/Abcb1b	7
GO:0098727	BP	GO:0098727	maintenance of cell number	10/512	213/28943	0.00486176	0.026962	0.0170203	Rbpj/Smc5/Ptn/Smarca2/Kat6a/Igf1/Nog/Myc/Fut10/Lif	10
GO:0032885	BP	GO:0032885	regulation of polysaccharide biosynthetic process	4/512	39/28943	0.00487771	0.026962	0.0170203	Has2/Cd36/Grb10/Igf1	4
GO:0033238	BP	GO:0033238	regulation of cellular amine metabolic process	4/512	39/28943	0.00487771	0.026962	0.0170203	Atp7a/Abat/Atp2b4/Maob	4
GO:0035066	BP	GO:0035066	positive regulation of histone acetylation	4/512	39/28943	0.00487771	0.026962	0.0170203	Rps6ka5/Arrb1/Snai2/Lif	4
GO:0048265	BP	GO:0048265	response to pain	4/512	39/28943	0.00487771	0.026962	0.0170203	Ednrb/Kcnip3/Calca/Slc6a2	4
GO:0090162	BP	GO:0090162	establishment of epithelial cell polarity	4/512	39/28943	0.00487771	0.026962	0.0170203	Wnt5a/Pard3/Msn/Fbf1	4
GO:0045862	BP	GO:0045862	positive regulation of proteolysis	14/512	357/28943	0.00488516	0.0269788	0.0170309	Dab2/Dlc1/Prickle1/Arrb1/Asph/Ccbe1/Ankib1/Rnft2/Spon1/Sfrp2/Nkd2/Myc/Dab2ip/Ppm1f	14
GO:1901987	BP	GO:1901987	regulation of cell cycle phase transition	16/512	434/28943	0.00493305	0.0272187	0.0171823	Pbx1/Egfr/Clock/Ppp2r5c/Cdc14a/Foxn3/Smarca2/Ccnd2/Atp2b4/Apbb2/Brd4/Npm1/Adamts1/Hus1/Rdx/Ccl2	16
GO:0002367	BP	GO:0002367	cytokine production involved in immune response	8/512	148/28943	0.0049587	0.0273108	0.0172405	Wnt5a/Cd36/Ccr2/Xcl1/Rtn4/Gprc5b/Tgfb2/Mr1	8
GO:0050729	BP	GO:0050729	positive regulation of inflammatory response	8/512	148/28943	0.0049587	0.0273108	0.0172405	Wnt5a/Nkg7/Clock/Pde2a/Ccr2/Gprc5b/Ace/Ccr5	8
GO:0003214	BP	GO:0003214	cardiac left ventricle morphogenesis	3/512	20/28943	0.00501459	0.0274454	0.0173254	Rbpj/Sfrp2/Tgfb2	3
GO:0007379	BP	GO:0007379	segment specification	3/512	20/28943	0.00501459	0.0274454	0.0173254	Cobl/Osr1/Nog	3
GO:0036120	BP	GO:0036120	cellular response to platelet-derived growth factor stimulus	3/512	20/28943	0.00501459	0.0274454	0.0173254	Has2/Atp7a/Snai2	3
GO:0050965	BP	GO:0050965	detection of temperature stimulus involved in sensory perception of pain	3/512	20/28943	0.00501459	0.0274454	0.0173254	Ano1/Cxcl12/Calca	3
GO:0060841	BP	GO:0060841	venous blood vessel development	3/512	20/28943	0.00501459	0.0274454	0.0173254	Heg1/Eng/Aplnr	3
GO:0090594	BP	GO:0090594	inflammatory response to wounding	3/512	20/28943	0.00501459	0.0274454	0.0173254	Abi3bp/Ccr2/Hif1a	3
GO:1904754	BP	GO:1904754	positive regulation of vascular associated smooth muscle cell migration	3/512	20/28943	0.00501459	0.0274454	0.0173254	Pcsk5/Atp7a/Adamts1	3
GO:0001892	BP	GO:0001892	embryonic placenta development	7/512	118/28943	0.00508923	0.027829	0.0175676	Rbpj/Egfr/Prdm1/Hif1a/Lef1/Xist/Lif	7
GO:0002694	BP	GO:0002694	regulation of leukocyte activation	24/512	763/28943	0.0051259	0.0280044	0.0176783	Vav3/Wnt5a/Gli3/Prdm1/Ccr2/Cd38/Smarca2/Xcl1/Lef1/Zeb1/Mfhas1/Atp11c/Igf1/Ptprc/Lmo1/Zmiz1/Abl1/Il13ra2/Fn1/Ccl2/Mad2l2/Efnb3/Cd83/Il15ra	24
GO:0042551	BP	GO:0042551	neuron maturation	5/512	63/28943	0.00514211	0.0280428	0.0177026	Dlg2/Ank3/Ednrb/B4galt6/Farp2	5
GO:0050435	BP	GO:0050435	amyloid-beta metabolic process	5/512	63/28943	0.00514211	0.0280428	0.0177026	Mme/Rtn4/Igf1/Spon1/Ace	5
GO:0032200	BP	GO:0032200	telomere organization	8/512	149/28943	0.00516126	0.0280971	0.0177368	Ino80d/Smc5/Hmbox1/Tnks/Hus1/Wrn/Myc/Mad2l2	8
GO:0043467	BP	GO:0043467	regulation of generation of precursor metabolites and energy	8/512	149/28943	0.00516126	0.0280971	0.0177368	Zbtb20/Cd36/Grb10/Pde2a/Hif1a/Atp7a/Igf1/Myc	8
GO:0009416	BP	GO:0009416	response to light stimulus	13/512	322/28943	0.00517395	0.0281412	0.0177646	Egfr/Mme/Synpo/Arrb1/Hif1a/Sema5a/Fbxl3/Nog/Npm1/Hus1/Wrn/Per1/Usp2	13
GO:1901989	BP	GO:1901989	positive regulation of cell cycle phase transition	7/512	119/28943	0.00532709	0.0289435	0.0182711	Pbx1/Egfr/Ccnd2/Brd4/Npm1/Adamts1/Rdx	7
GO:0033144	BP	GO:0033144	negative regulation of intracellular steroid hormone receptor signaling pathway	4/512	40/28943	0.00534516	0.0289435	0.0182711	Dab2/Clock/Igf1/Per1	4
GO:0050931	BP	GO:0050931	pigment cell differentiation	4/512	40/28943	0.00534516	0.0289435	0.0182711	Edn3/Gli3/Zeb2/Ednrb	4
GO:1903670	BP	GO:1903670	regulation of sprouting angiogenesis	4/512	40/28943	0.00534516	0.0289435	0.0182711	Jak1/Bmper/Stard13/Ppp1r16b	4
GO:1905332	BP	GO:1905332	positive regulation of morphogenesis of an epithelium	4/512	40/28943	0.00534516	0.0289435	0.0182711	Pdgfra/Nog/Abl1/Lif	4
GO:0055007	BP	GO:0055007	cardiac muscle cell differentiation	8/512	150/28943	0.00537009	0.029027	0.0183238	Col14a1/Rbpj/Igf1/Pdgfra/Ccnd2/Zmpste24/Mef2a/Rgs2	8
GO:0072331	BP	GO:0072331	signal transduction by p53 class mediator	8/512	150/28943	0.00537009	0.029027	0.0183238	Ppp2r5c/Eda2r/Mdm4/Npm1/Snai2/Zmpste24/Myc/Rrp8	8
GO:0051893	BP	GO:0051893	regulation of focal adhesion assembly	5/512	64/28943	0.00549848	0.0296423	0.0187123	Dlc1/Macf1/Abl1/Slk/Ppm1f	5
GO:0060393	BP	GO:0060393	regulation of pathway-restricted SMAD protein phosphorylation	5/512	64/28943	0.00549848	0.0296423	0.0187123	Bmper/Dab2/Nog/Eng/Tgfb2	5
GO:0090109	BP	GO:0090109	regulation of cell-substrate junction assembly	5/512	64/28943	0.00549848	0.0296423	0.0187123	Dlc1/Macf1/Abl1/Slk/Ppm1f	5
GO:0006470	BP	GO:0006470	protein dephosphorylation	11/512	252/28943	0.00553971	0.0298383	0.018836	Ppp2r5c/Dlc1/Cdc14a/Ptprg/Vcan/Mfhas1/Ptprc/Ppm1e/Cdh5/Ppm1f/Ppp1r16b	11
GO:0051209	BP	GO:0051209	release of sequestered calcium ion into cytosol	7/512	120/28943	0.0055732	0.0299922	0.0189331	Xcl1/Asph/Ptprc/Abl1/Tgfb2/Ccr5/Aplnr	7
GO:0070588	BP	GO:0070588	calcium ion transmembrane transport	13/512	325/28943	0.00558091	0.0300072	0.0189426	Cacna2d1/Xcl1/Asph/Ednrb/Atp2b4/Ptprc/Cacng4/Calca/Abl1/Tgfb2/Ccr5/Atp1b1/Aplnr	13
GO:0046209	BP	GO:0046209	nitric oxide metabolic process	6/512	91/28943	0.00559233	0.0300422	0.0189647	Cd36/Cyp1b1/Igf1/Atp2b4/Ddah1/Ptx3	6
GO:0071674	BP	GO:0071674	mononuclear cell migration	9/512	184/28943	0.00568184	0.0304962	0.0192513	Wnt5a/Pdgfd/Ccr2/Jam2/Xcl1/Msn/Cxcl12/Calca/Ccl2	9
GO:0051259	BP	GO:0051259	protein complex oligomerization	11/512	253/28943	0.00570223	0.0305639	0.019294	Kcnd2/Ect2/Steap4/Acaca/Scara5/Kcnd3/Aqp11/Znhit6/Tdo2/Spast/Kctd12	11
GO:0030522	BP	GO:0030522	intracellular receptor signaling pathway	10/512	218/28943	0.00570446	0.0305639	0.019294	Cyp26a1/Dab2/Clock/Ube3a/Ddx17/Rbfox2/Igf1/Zmiz1/Snai2/Per1	10
GO:0030217	BP	GO:0030217	T cell differentiation	13/512	326/28943	0.00572211	0.0306316	0.0193368	Gli3/Prdm1/Ccr2/Smarca2/Lef1/Satb1/Zeb1/Atp7a/Ptprc/Zmiz1/Abl1/Mr1/Cd83	13
GO:0034755	BP	GO:0034755	iron ion transmembrane transport	3/512	21/28943	0.00577434	0.0307763	0.0194281	Steap4/Scara5/Atp7a	3
GO:0045821	BP	GO:0045821	positive regulation of glycolytic process	3/512	21/28943	0.00577434	0.0307763	0.0194281	Zbtb20/Igf1/Myc	3
GO:0046697	BP	GO:0046697	decidualization	3/512	21/28943	0.00577434	0.0307763	0.0194281	Ptn/Tcf23/Lif	3
GO:0051797	BP	GO:0051797	regulation of hair follicle development	3/512	21/28943	0.00577434	0.0307763	0.0194281	Wnt5a/Fst/Tgfb2	3
GO:0070230	BP	GO:0070230	positive regulation of lymphocyte apoptotic process	3/512	21/28943	0.00577434	0.0307763	0.0194281	Wnt5a/Myc/Tgfb2	3
GO:0051283	BP	GO:0051283	negative regulation of sequestering of calcium ion	7/512	121/28943	0.00582772	0.0310337	0.0195906	Xcl1/Asph/Ptprc/Abl1/Tgfb2/Ccr5/Aplnr	7
GO:0034110	BP	GO:0034110	regulation of homotypic cell-cell adhesion	4/512	41/28943	0.00584163	0.0310537	0.0196032	Jak1/Ank3/Abat/Rdx	4
GO:0035850	BP	GO:0035850	epithelial cell differentiation involved in kidney development	4/512	41/28943	0.00584163	0.0310537	0.0196032	Basp1/Osr1/Ednrb/Lif	4
GO:0098930	BP	GO:0098930	axonal transport	5/512	65/28943	0.00587195	0.031072	0.0196148	Map2/Dlg2/Fez1/Hif1a/Spast	5
GO:0007219	BP	GO:0007219	Notch signaling pathway	9/512	185/28943	0.00588174	0.031072	0.0196148	Rbpj/Arrb1/Tmem100/Zmiz1/Snai2/Zfp423/Tgfb2/Poglut1/Notch3	9
GO:0071897	BP	GO:0071897	DNA biosynthetic process	9/512	185/28943	0.00588174	0.031072	0.0196148	Hgf/Cyp1b1/Hmbox1/Tnks/Npm1/Wrn/Myc/Prkd2/Mad2l2	9
GO:0097553	BP	GO:0097553	calcium ion transmembrane import into cytosol	9/512	185/28943	0.00588174	0.031072	0.0196148	Cacna2d1/Xcl1/Asph/Ptprc/Calca/Abl1/Tgfb2/Ccr5/Aplnr	9
GO:1903050	BP	GO:1903050	regulation of proteolysis involved in protein catabolic process	10/512	219/28943	0.00588591	0.031072	0.0196148	Dab2/Ube3a/Prickle1/Xpo1/Aqp11/Ankib1/Rnft2/Nkd2/Dab2ip/Sufu	10
GO:0006664	BP	GO:0006664	glycolipid metabolic process	6/512	92/28943	0.00589534	0.031072	0.0196148	Itgb8/St8sia4/St3gal1/B4galt6/St6galnac4/Cwh43	6
GO:0035050	BP	GO:0035050	embryonic heart tube development	6/512	92/28943	0.00589534	0.031072	0.0196148	Wnt5a/Rbpj/Hif1a/Eng/Sufu/Aplnr	6
GO:0043297	BP	GO:0043297	apical junction assembly	6/512	92/28943	0.00589534	0.031072	0.0196148	Ect2/Pard3/Abi2/Snai2/Cdh5/Fbf1	6
GO:0097581	BP	GO:0097581	lamellipodium organization	6/512	92/28943	0.00589534	0.031072	0.0196148	Vav3/Ablim1/Abi2/Wasf3/Atp7a/Fscn1	6
GO:2000112	BP	GO:2000112	regulation of cellular macromolecule biosynthetic process	17/512	482/28943	0.00589595	0.031072	0.0196148	Rbms3/Cd36/Cyp1b1/Grb10/Caprin2/Vim/Kbtbd8/Igf1/Itm2a/Ilf3/Npm1/Secisbp2l/Rgs2/Ago2/Samd4/Per1/Sarnp	17
GO:0032680	BP	GO:0032680	regulation of tumor necrosis factor production	9/512	186/28943	0.00608702	0.0319886	0.0201934	Zbtb20/Wnt5a/Cd36/Clec4a2/Ccr2/Igf1/Ptprc/Ccl2/Ccr5	9
GO:0007498	BP	GO:0007498	mesoderm development	7/512	122/28943	0.00609083	0.0319886	0.0201934	Wnt5a/Osr1/Macf1/Lef1/Nog/Sfrp2/Poglut1	7
GO:0009636	BP	GO:0009636	response to toxic substance	7/512	122/28943	0.00609083	0.0319886	0.0201934	Cd36/Cyp1b1/Abcg2/Hif1a/Atp7a/Slc30a4/Abcb1b	7
GO:0051963	BP	GO:0051963	regulation of synapse assembly	7/512	122/28943	0.00609083	0.0319886	0.0201934	Wnt5a/Gpc6/Lrrn1/Slitrk3/Fzd1/Clstn1/Ntng2	7
GO:0002248	BP	GO:0002248	connective tissue replacement involved in inflammatory response wound healing	2/512	7/28943	0.00618375	0.0320359	0.0202233	Abi3bp/Hif1a	2
GO:0021910	BP	GO:0021910	smoothened signaling pathway involved in ventral spinal cord patterning	2/512	7/28943	0.00618375	0.0320359	0.0202233	Gli3/Sufu	2
GO:0030046	BP	GO:0030046	parallel actin filament bundle assembly	2/512	7/28943	0.00618375	0.0320359	0.0202233	Spire1/Fscn1	2
GO:0032364	BP	GO:0032364	oxygen homeostasis	2/512	7/28943	0.00618375	0.0320359	0.0202233	Hif1a/Aqp11	2
GO:0033239	BP	GO:0033239	negative regulation of cellular amine metabolic process	2/512	7/28943	0.00618375	0.0320359	0.0202233	Atp7a/Atp2b4	2
GO:0035790	BP	GO:0035790	platelet-derived growth factor receptor-alpha signaling pathway	2/512	7/28943	0.00618375	0.0320359	0.0202233	Cbl/Pdgfra	2
GO:0042985	BP	GO:0042985	negative regulation of amyloid precursor protein biosynthetic process	2/512	7/28943	0.00618375	0.0320359	0.0202233	Itm2a/Ago2	2
GO:0048842	BP	GO:0048842	positive regulation of axon extension involved in axon guidance	2/512	7/28943	0.00618375	0.0320359	0.0202233	Sema5a/Cxcl12	2
GO:0051541	BP	GO:0051541	elastin metabolic process	2/512	7/28943	0.00618375	0.0320359	0.0202233	Hif1a/Atp7a	2
GO:0061438	BP	GO:0061438	renal system vasculature morphogenesis	2/512	7/28943	0.00618375	0.0320359	0.0202233	Pdgfra/Notch3	2
GO:0061439	BP	GO:0061439	kidney vasculature morphogenesis	2/512	7/28943	0.00618375	0.0320359	0.0202233	Pdgfra/Notch3	2
GO:0070235	BP	GO:0070235	regulation of activation-induced cell death of T cells	2/512	7/28943	0.00618375	0.0320359	0.0202233	Tsc22d3/Tgfb2	2
GO:0072180	BP	GO:0072180	mesonephric duct morphogenesis	2/512	7/28943	0.00618375	0.0320359	0.0202233	Osr1/Gpc3	2
GO:0090281	BP	GO:0090281	negative regulation of calcium ion import	2/512	7/28943	0.00618375	0.0320359	0.0202233	Spink1/Ace	2
GO:1901621	BP	GO:1901621	negative regulation of smoothened signaling pathway involved in dorsal/ventral neural tube patterning	2/512	7/28943	0.00618375	0.0320359	0.0202233	Sufu/Gpr161	2
GO:2000543	BP	GO:2000543	positive regulation of gastrulation	2/512	7/28943	0.00618375	0.0320359	0.0202233	Osr1/Osr2	2
GO:0055072	BP	GO:0055072	iron ion homeostasis	6/512	93/28943	0.00621014	0.0320639	0.0202409	Steap4/Cp/Hif1a/Scara5/Heph/Myc	6
GO:1901379	BP	GO:1901379	regulation of potassium ion transmembrane transport	6/512	93/28943	0.00621014	0.0320639	0.0202409	Edn3/Kcnab1/Kcnab2/Ank3/Kcnip3/Atp1b1	6
GO:1903509	BP	GO:1903509	liposaccharide metabolic process	6/512	93/28943	0.00621014	0.0320639	0.0202409	Itgb8/St8sia4/St3gal1/B4galt6/St6galnac4/Cwh43	6
GO:2001057	BP	GO:2001057	reactive nitrogen species metabolic process	6/512	93/28943	0.00621014	0.0320639	0.0202409	Cd36/Cyp1b1/Igf1/Atp2b4/Ddah1/Ptx3	6
GO:0009247	BP	GO:0009247	glycolipid biosynthetic process	5/512	66/28943	0.00626292	0.0322818	0.0203785	St8sia4/St3gal1/B4galt6/St6galnac4/Cwh43	5
GO:0060038	BP	GO:0060038	cardiac muscle cell proliferation	5/512	66/28943	0.00626292	0.0322818	0.0203785	Rbpj/Tgfbr3/Ccnd2/Nog/Tgfb2	5
GO:0051282	BP	GO:0051282	regulation of sequestering of calcium ion	7/512	123/28943	0.0063627	0.0326027	0.020581	Xcl1/Asph/Ptprc/Abl1/Tgfb2/Ccr5/Aplnr	7
GO:0010464	BP	GO:0010464	regulation of mesenchymal cell proliferation	4/512	42/28943	0.00636788	0.0326027	0.020581	Wnt5a/Ptn/Zeb1/Myc	4
GO:0014059	BP	GO:0014059	regulation of dopamine secretion	4/512	42/28943	0.00636788	0.0326027	0.020581	Rtn4/Abat/Cxcl12/Syt15	4
GO:0018149	BP	GO:0018149	peptide cross-linking	4/512	42/28943	0.00636788	0.0326027	0.020581	Mamdc2/Egflam/Spock2/Fn1	4
GO:0048730	BP	GO:0048730	epidermis morphogenesis	4/512	42/28943	0.00636788	0.0326027	0.020581	Lamc1/Fst/Atp7a/Tgfb2	4
GO:0061081	BP	GO:0061081	positive regulation of myeloid leukocyte cytokine production involved in immune response	4/512	42/28943	0.00636788	0.0326027	0.020581	Wnt5a/Cd36/Rtn4/Gprc5b	4
GO:0099174	BP	GO:0099174	regulation of presynapse organization	4/512	42/28943	0.00636788	0.0326027	0.020581	Gpc6/Slitrk3/Fzd1/Ntng2	4
GO:1900181	BP	GO:1900181	negative regulation of protein localization to nucleus	4/512	42/28943	0.00636788	0.0326027	0.020581	Cd36/Dclk1/Dclk2/Mfhas1	4
GO:0002285	BP	GO:0002285	lymphocyte activation involved in immune response	10/512	222/28943	0.00645734	0.033033	0.0208527	Nkg7/Ccr2/Lef1/Atp7a/St3gal1/Itm2a/Apbb1ip/Ptprc/Abl1/Mad2l2	10
GO:0006643	BP	GO:0006643	membrane lipid metabolic process	9/512	188/28943	0.00651409	0.0332954	0.0210184	Sptlc3/Itgb8/Cyp1b1/B3gnt5/St8sia4/St3gal1/B4galt6/St6galnac4/Cwh43	9
GO:0042475	BP	GO:0042475	odontogenesis of dentin-containing tooth	6/512	94/28943	0.006537	0.0333846	0.0210747	Fst/Gli3/Apcdd1/Lef1/Pdgfra/Wnt6	6
GO:0050872	BP	GO:0050872	white fat cell differentiation	3/512	22/28943	0.00659929	0.0334788	0.0211341	Creb5/Pdgfra/Snai2	3
GO:0071800	BP	GO:0071800	podosome assembly	3/512	22/28943	0.00659929	0.0334788	0.0211341	Msn/Farp2/Fscn1	3
GO:0072578	BP	GO:0072578	neurotransmitter-gated ion channel clustering	3/512	22/28943	0.00659929	0.0334788	0.0211341	Slitrk3/Zdhhc2/Shank3	3
GO:0090026	BP	GO:0090026	positive regulation of monocyte chemotaxis	3/512	22/28943	0.00659929	0.0334788	0.0211341	Ccr2/Cxcl12/Ccl2	3
GO:0150104	BP	GO:0150104	transport across blood-brain barrier	3/512	22/28943	0.00659929	0.0334788	0.0211341	Cd36/Abcg2/Abcb1b	3
GO:1900746	BP	GO:1900746	regulation of vascular endothelial growth factor signaling pathway	3/512	22/28943	0.00659929	0.0334788	0.0211341	Tcf4/Ccbe1/Dab2ip	3
GO:1902992	BP	GO:1902992	negative regulation of amyloid precursor protein catabolic process	3/512	22/28943	0.00659929	0.0334788	0.0211341	Rtn4/Igf1/Spon1	3
GO:1903909	BP	GO:1903909	regulation of receptor clustering	3/512	22/28943	0.00659929	0.0334788	0.0211341	Ptn/Zdhhc2/Shank3	3
GO:0032963	BP	GO:0032963	collagen metabolic process	7/512	124/28943	0.0066435	0.0336472	0.0212404	Suco/Tgfbr3/Vim/Hif1a/Tram2/Fn1/Ccl2	7
GO:0046620	BP	GO:0046620	regulation of organ growth	7/512	124/28943	0.0066435	0.0336472	0.0212404	Col14a1/Rbpj/Tgfbr3/Igf1/Ccnd2/Nog/Rgs2	7
GO:0001707	BP	GO:0001707	mesoderm formation	5/512	67/28943	0.0066718	0.0337346	0.0212956	Wnt5a/Macf1/Lef1/Nog/Sfrp2	5
GO:0032663	BP	GO:0032663	regulation of interleukin-2 production	5/512	67/28943	0.0066718	0.0337346	0.0212956	Ccr2/Ptprc/Abl1/Prkd2/Cd83	5
GO:1903555	BP	GO:1903555	regulation of tumor necrosis factor superfamily cytokine production	9/512	189/28943	0.00673607	0.0340314	0.0214829	Zbtb20/Wnt5a/Cd36/Clec4a2/Ccr2/Igf1/Ptprc/Ccl2/Ccr5	9
GO:0051341	BP	GO:0051341	regulation of oxidoreductase activity	6/512	95/28943	0.00687616	0.0346817	0.0218935	Edn3/Egfr/Atp7a/Atp2b4/Abl1/Eng	6
GO:1901983	BP	GO:1901983	regulation of protein acetylation	6/512	95/28943	0.00687616	0.0346817	0.0218935	Rps6ka5/Arrb1/Zfp451/Snai2/Zmpste24/Lif	6
GO:0045981	BP	GO:0045981	positive regulation of nucleotide metabolic process	4/512	43/28943	0.00692464	0.0347981	0.0219669	Zbtb20/Pid1/Igf1/Myc	4
GO:1900026	BP	GO:1900026	positive regulation of substrate adhesion-dependent cell spreading	4/512	43/28943	0.00692464	0.0347981	0.0219669	Has2/Dab2/Nedd9/Abl1	4
GO:1900544	BP	GO:1900544	positive regulation of purine nucleotide metabolic process	4/512	43/28943	0.00692464	0.0347981	0.0219669	Zbtb20/Pid1/Igf1/Myc	4
GO:0035710	BP	GO:0035710	CD4-positive, alpha-beta T cell activation	7/512	125/28943	0.00693341	0.0347981	0.0219669	Nkg7/Ccr2/Xcl1/Lef1/Satb1/Atp7a/Cd83	7
GO:0045582	BP	GO:0045582	positive regulation of T cell differentiation	7/512	125/28943	0.00693341	0.0347981	0.0219669	Gli3/Ccr2/Smarca2/Lef1/Ptprc/Zmiz1/Cd83	7
GO:0051208	BP	GO:0051208	sequestering of calcium ion	7/512	125/28943	0.00693341	0.0347981	0.0219669	Xcl1/Asph/Ptprc/Abl1/Tgfb2/Ccr5/Aplnr	7
GO:0000302	BP	GO:0000302	response to reactive oxygen species	9/512	190/28943	0.00696381	0.0349219	0.0220451	Ect2/Egfr/Cd36/Hgf/Cyp1b1/Hif1a/Atp7a/Pdgfra/Abl1	9
GO:0006879	BP	GO:0006879	cellular iron ion homeostasis	5/512	68/28943	0.00709901	0.0355416	0.0224363	Steap4/Hif1a/Scara5/Heph/Myc	5
GO:0061082	BP	GO:0061082	myeloid leukocyte cytokine production	5/512	68/28943	0.00709901	0.0355416	0.0224363	Wnt5a/Cd36/Rtn4/Gprc5b/Tgfb2	5
GO:0050806	BP	GO:0050806	positive regulation of synaptic transmission	13/512	335/28943	0.00712554	0.0356452	0.0225017	Lama2/Gria4/Mme/Ptn/Ccr2/Tshz3/Nog/Cacng4/Clstn1/Abl1/Zdhhc2/Ccl2/Shank3	13
GO:0043122	BP	GO:0043122	regulation of I-kappaB kinase/NF-kappaB signaling	9/512	191/28943	0.0071974	0.0359752	0.02271	Wnt5a/Cd36/Eda2r/Gprc5b/Brd4/Abl1/Dab2ip/Per1/Cpne1	9
GO:0035304	BP	GO:0035304	regulation of protein dephosphorylation	6/512	96/28943	0.00722788	0.0360921	0.0227838	Dlc1/Vcan/Mfhas1/Ptprc/Cdh5/Ppp1r16b	6
GO:0002718	BP	GO:0002718	regulation of cytokine production involved in immune response	7/512	126/28943	0.0072326	0.0360921	0.0227838	Wnt5a/Cd36/Ccr2/Xcl1/Rtn4/Gprc5b/Tgfb2	7
GO:0034248	BP	GO:0034248	regulation of cellular amide metabolic process	16/512	453/28943	0.00732725	0.0365345	0.0230631	Rbms3/Cyp1b1/Caprin2/Vim/Kbtbd8/Rtn4/Igf1/Ilf3/Npm1/Secisbp2l/Spon1/Rgs2/Ago2/Samd4/Per1/Sarnp	16
GO:0010466	BP	GO:0010466	negative regulation of peptidase activity	11/512	262/28943	0.00733988	0.0365573	0.0230775	Hgf/Tfpi2/Spink1/Pi15/Arrb1/Igf1/Gpc3/Sfrp2/Wfdc3/Tfpi/Simc1	11
[truncated: 405 more rows]

## Sheet: Supplementary File 3e
Supplementary Table 5: Results of KEGG pathway enrichment analysis for shared genes bound by SMAD1, SMAD5, and PR. (Plotted in Figure 5B)
[truncated: 21 more rows]

## Sheet: Supplementary File 3f
Supplementary Table 6: Results of motif analysis results for shared peaks between SMAD1, SMAD5 and PR. (Plotted in Figure 5D)
[truncated: 64 more rows]

[truncated: 2 more sheets: Supplementary File 3g, Supplementary File 3h]
